# Supplementary material for: A CRISPR-Cas9 screen identifies EXO1 as a formaldehyde resistance gene
Source: Nat Commun. 2023 Jan 24;14:381. doi: 10.1038/s41467-023-35802-y (PMC9873647; doi:10.1038/s41467-023-35802-y)
Supplement: Supplementary file 4 — Supplementary Data 1 [file 41467_2023_35802_MOESM4_ESM.xlsx]

## Sheet: DrugZ T9 R1
GENE	sumZ	numObs	normZ	pval_synth	rank_synth	fdr_synth	pval_supp	rank_supp	fdr_supp
ERCC8	-26.83	6	-10.53	3.19e-26	1	5.5e-22	1	17226	1
ERCC6	-17.45	6	-6.82	4.45e-12	2	3.04e-08	1	17225	1
ESD	-14.2	4	-6.8	5.3e-12	3	3.04e-08	1	17224	1
ADH5	-8.67	2	-5.86	2.3e-09	4	9.9e-06	1	17223	1
FANCF	-11.92	5	-5.09	1.83e-07	5	0.000632	1	17222	1
ERCC5	-12.42	6	-4.83	6.66e-07	6	0.00185	1	17221	1
BRIP1	-12.36	6	-4.81	7.52e-07	7	0.00185	1	17220	1
TADA2B	-12.17	6	-4.74	1.08e-06	8	0.00232	1	17219	1
C17orf70	-11.88	6	-4.62	1.89e-06	9	0.00361	1	17218	1
FANCC	-10.68	6	-4.15	1.67e-05	10	0.0288	1	17217	1
STXBP4	-10.02	6	-3.89	5.08e-05	11	0.0796	1	17216	1
TRAF3	-9.73	6	-3.77	8.01e-05	12	0.115	1	17215	1
SRCIN1	-9.63	6	-3.73	9.41e-05	13	0.116	1	17214	1
HSD17B11	-6.79	3	-3.73	9.76e-05	14	0.116	1	17213	1
EID2	-7.82	4	-3.72	0.000102	15	0.116	1	17212	1
FANCG	-9.54	6	-3.7	0.000108	16	0.116	1	17211	1
DAZAP2	-6.49	3	-3.56	0.000187	17	0.19	1	17210	1
EXO1	-9.13	6	-3.54	0.000204	18	0.195	1	17209	1
TNFRSF19	-9.08	6	-3.52	0.000219	19	0.198	1	17208	1
C19orf40	-9.03	6	-3.5	0.000234	20	0.198	1	17207	1
HOXD11	-9.01	6	-3.49	0.000242	21	0.198	1	17206	1
PRDM12	-8.83	6	-3.42	0.000314	22	0.246	1	17205	1
NKX2-4	-8.73	6	-3.38	0.000367	23	0.271	1	17204	1
HOXA5	-8.71	6	-3.37	0.000377	24	0.271	1	17203	1
SNX20	-8.66	6	-3.35	0.000402	25	0.276	1	17202	1
NFAM1	-8.64	6	-3.34	0.000416	26	0.276	1	17201	1
SLC17A7	-8.56	6	-3.31	0.000468	27	0.292	1	17200	1
SOLH	-8.54	6	-3.3	0.000475	28	0.292	1	17199	1
OR10P1	-8.48	6	-3.28	0.00052	29	0.309	0.999	17198	1
CDON	-8.45	6	-3.27	0.000543	30	0.312	0.999	17197	1
TOR4A	-7.65	5	-3.24	0.000594	31	0.325	0.999	17196	1
BBX	-8.34	6	-3.22	0.000632	32	0.325	0.999	17195	1
ANKRD11	-8.32	6	-3.22	0.000647	33	0.325	0.999	17194	1
FAM167B	-7.57	5	-3.21	0.000675	34	0.325	0.999	17193	1
OPN4	-8.26	6	-3.19	0.000707	35	0.325	0.999	17192	1
GRID1	-8.24	6	-3.18	0.000728	36	0.325	0.999	17191	1
PLXNA2	-8.24	6	-3.18	0.000729	37	0.325	0.999	17190	1
RFWD3	-8.22	6	-3.18	0.000741	38	0.325	0.999	17189	1
FNBP1L	-8.22	6	-3.18	0.000747	39	0.325	0.999	17188	1
DAZAP1	-8.19	6	-3.17	0.000772	40	0.325	0.999	17187	1
HCFC1R1	-6.65	4	-3.15	0.000819	41	0.325	0.999	17186	1
GSR	-8.14	6	-3.15	0.000827	42	0.325	0.999	17185	1
FANCA	-8.14	6	-3.14	0.000833	43	0.325	0.999	17184	1
XPC	-8.11	6	-3.13	0.000866	44	0.325	0.999	17183	1
ODF3L2	-8.11	6	-3.13	0.000869	45	0.325	0.999	17182	1
ANKRD65	-8.1	6	-3.13	0.000871	46	0.325	0.999	17181	1
IFT172	-8.08	6	-3.12	0.000898	47	0.325	0.999	17180	1
STIP1	-8.08	6	-3.12	0.000905	48	0.325	0.999	17179	1
LEPREL4	-8.01	6	-3.09	0.000992	49	0.349	0.999	17178	1
PPL	-7.99	6	-3.09	0.00102	50	0.35	0.999	17177	1
ZSCAN18	-7.97	6	-3.08	0.00104	51	0.353	0.999	17176	1
COL21A1	-7.87	6	-3.04	0.0012	52	0.394	0.999	17175	1
C5orf22	-6.41	4	-3.03	0.00121	53	0.394	0.999	17174	1
TLR1	-5.54	3	-3.03	0.00124	54	0.396	0.999	17173	1
NSF	-7.72	6	-2.98	0.00145	55	0.45	0.999	17172	1
SFMBT1	-7.69	6	-2.97	0.0015	56	0.45	0.999	17171	1
FANCI	-7.68	6	-2.96	0.00151	57	0.45	0.998	17170	1
SHARPIN	-7.67	6	-2.96	0.00155	58	0.45	0.998	17169	1
RDH5	-7.66	6	-2.95	0.00157	59	0.45	0.998	17168	1
TULP3	-7.62	6	-2.94	0.00163	60	0.45	0.998	17167	1
TSKS	-7.6	6	-2.93	0.00168	61	0.45	0.998	17166	1
MAP3K13	-7.59	6	-2.93	0.0017	62	0.45	0.998	17165	1
CHMP4C	-6.92	5	-2.92	0.00172	63	0.45	0.998	17164	1
DTD2	-6.19	4	-2.92	0.00172	64	0.45	0.998	17163	1
IL1R2	-7.58	6	-2.92	0.00173	65	0.45	0.998	17162	1
KCNJ11	-7.57	6	-2.92	0.00174	66	0.45	0.998	17161	1
GPR150	-6.91	5	-2.92	0.00175	67	0.45	0.998	17160	1
SOCS4	-6.16	4	-2.91	0.00181	68	0.457	0.998	17159	1
POLR2I	-7.47	6	-2.88	0.00198	69	0.49	0.998	17158	1
NXT2	-6.82	5	-2.88	0.00199	70	0.49	0.998	17157	1
SLC22A7	-7.44	6	-2.87	0.00207	71	0.502	0.998	17156	1
TPM1	-7.39	6	-2.85	0.0022	72	0.502	0.998	17155	1
LEPROT	-4.25	2	-2.84	0.00225	73	0.502	0.998	17154	1
TCTEX1D2	-6	4	-2.83	0.00231	74	0.502	0.998	17153	1
SYT4	-6	4	-2.83	0.00233	75	0.502	0.998	17152	1
LURAP1	-6.7	5	-2.83	0.00235	76	0.502	0.998	17151	1
PPM1F	-7.33	6	-2.83	0.00235	77	0.502	0.998	17150	1
CYP4F2	-2.99	1	-2.82	0.00241	78	0.502	0.998	17149	1
STXBP6	-7.31	6	-2.82	0.00242	79	0.502	0.998	17148	1
KLK10	-7.29	6	-2.81	0.00249	80	0.502	0.998	17147	1
PGBD3	-7.29	6	-2.81	0.00249	81	0.502	0.998	17146	1
MAN2A2	-7.27	6	-2.8	0.00256	82	0.502	0.997	17145	1
ALKBH7	-7.26	6	-2.8	0.00258	83	0.502	0.997	17144	1
GJB1	-5.92	4	-2.79	0.00261	84	0.502	0.997	17143	1
ANKRD35	-7.25	6	-2.79	0.00261	85	0.502	0.997	17142	1
WDR88	-7.25	6	-2.79	0.00261	86	0.502	0.997	17141	1
CCDC64B	-7.24	6	-2.79	0.00263	87	0.502	0.997	17140	1
CCS	-7.24	6	-2.79	0.00264	88	0.502	0.997	17139	1
ZNF226	-5.91	4	-2.79	0.00265	89	0.502	0.997	17138	1
A1BG	-7.23	6	-2.79	0.00266	90	0.502	0.997	17137	1
LYPLA1	-2.95	1	-2.78	0.00268	91	0.502	0.997	17136	1
RAB31	-6.59	5	-2.78	0.00271	92	0.502	0.997	17135	1
VPS37D	-7.21	6	-2.78	0.00272	93	0.502	0.997	17134	1
OR6Q1	-5.1	3	-2.78	0.00274	94	0.502	0.997	17133	1
ESPNL	-7.16	6	-2.76	0.00291	95	0.526	0.997	17132	1
FANCE	-7.15	6	-2.75	0.00296	96	0.526	0.997	17131	1
RARS	-6.52	5	-2.75	0.00296	97	0.526	0.997	17130	1
BHLHE23	-6.5	5	-2.74	0.00304	98	0.535	0.997	17129	1
HCRTR2	-7.11	6	-2.74	0.00308	99	0.536	0.997	17128	1
TFIP11	-7.07	6	-2.72	0.00322	100	0.547	0.997	17127	1
ENPEP	-7.07	6	-2.72	0.00323	101	0.547	0.997	17126	1
WIPF2	-7.07	6	-2.72	0.00325	102	0.547	0.997	17125	1
EN1	-6.45	5	-2.72	0.00327	103	0.547	0.997	17124	1
NDUFA13	-7.05	6	-2.71	0.00333	104	0.551	0.997	17123	1
PIGT	-7.01	6	-2.7	0.00347	105	0.552	0.997	17122	1
SLC16A6	-4.95	3	-2.7	0.0035	106	0.552	0.997	17121	1
MTSS1L	-7	6	-2.69	0.00353	107	0.552	0.996	17120	1
OR5J2	-4.04	2	-2.69	0.00357	108	0.552	0.996	17119	1
HOXB9	-6.99	6	-2.69	0.00358	109	0.552	0.996	17118	1
HTR5A	-6.37	5	-2.69	0.00362	110	0.552	0.996	17117	1
PDE10A	-6.98	6	-2.69	0.00362	111	0.552	0.996	17116	1
USP46	-6.97	6	-2.68	0.00365	112	0.552	0.996	17115	1
PDGFA	-6.96	6	-2.68	0.00367	113	0.552	0.996	17114	1
KIAA0825	-6.96	6	-2.68	0.00368	114	0.552	0.996	17113	1
TGM2	-6.96	6	-2.68	0.00371	115	0.552	0.996	17112	1
ZNF395	-6.95	6	-2.67	0.00375	116	0.552	0.996	17111	1
IQSEC3	-6.95	6	-2.67	0.00375	117	0.552	0.996	17110	1
LRCH3	-6.92	6	-2.66	0.00386	118	0.557	0.996	17109	1
TMEM233	-6.92	6	-2.66	0.00387	119	0.557	0.996	17108	1
QSER1	-6.31	5	-2.66	0.00391	120	0.557	0.996	17107	1
FAM151A	-6.29	5	-2.65	0.00399	121	0.557	0.996	17106	1
ATP8B1	-6.89	6	-2.65	0.004	122	0.557	0.996	17105	1
BDH1	-6.88	6	-2.65	0.00405	123	0.557	0.996	17104	1
CDH4	-6.88	6	-2.65	0.00407	124	0.557	0.996	17103	1
VEGFC	-6.87	6	-2.64	0.00409	125	0.557	0.996	17102	1
ARFGAP1	-6.86	6	-2.64	0.00415	126	0.557	0.996	17101	1
NACAD	-6.85	6	-2.64	0.00418	127	0.557	0.996	17100	1
ART3	-3.95	2	-2.64	0.00421	128	0.557	0.996	17099	1
SLC18A1	-6.84	6	-2.63	0.00424	129	0.557	0.996	17098	1
SCAMP5	-6.84	6	-2.63	0.00427	130	0.557	0.996	17097	1
PHF14	-6.83	6	-2.63	0.00428	131	0.557	0.996	17096	1
F10	-6.82	6	-2.62	0.00434	132	0.557	0.996	17095	1
PEX3	-3.94	2	-2.62	0.00436	133	0.557	0.996	17094	1
ATE1	-6.82	6	-2.62	0.00437	134	0.557	0.996	17093	1
FAM212A	-6.81	6	-2.62	0.00441	135	0.557	0.996	17092	1
EVX1	-6.81	6	-2.62	0.00442	136	0.557	0.996	17091	1
UBE2O	-6.8	6	-2.62	0.00443	137	0.557	0.996	17090	1
PLEKHG5	-6.8	6	-2.62	0.00446	138	0.557	0.996	17089	1
VAT1L	-6.79	6	-2.61	0.0045	139	0.558	0.995	17088	1
FRYL	-6.78	6	-2.61	0.00456	140	0.561	0.995	17087	1
DPP7	-6.76	6	-2.6	0.00466	141	0.57	0.995	17086	1
CC2D1B	-6.75	6	-2.6	0.0047	142	0.57	0.995	17085	1
RBPJ	-6.15	5	-2.59	0.00481	143	0.58	0.995	17084	1
SNTB1	-6.72	6	-2.59	0.00485	144	0.581	0.995	17083	1
UCK2	-6.7	6	-2.58	0.00497	145	0.588	0.995	17082	1
ARPP21	-6.7	6	-2.58	0.00499	146	0.588	0.995	17081	1
APOH	-6.69	6	-2.57	0.00503	147	0.589	0.995	17080	1
STX1A	-6.68	6	-2.57	0.00509	148	0.592	0.995	17079	1
TCP10L	-2.72	1	-2.57	0.00514	149	0.592	0.995	17078	1
RNASE8	-3.85	2	-2.57	0.00515	150	0.592	0.995	17077	1
GNAT2	-6.65	6	-2.55	0.00531	151	0.604	0.995	17076	1
IL17D	-6.06	5	-2.55	0.00533	152	0.604	0.995	17075	1
DUSP7	-6.62	6	-2.55	0.00546	153	0.615	0.995	17074	1
HMHA1	-6.57	6	-2.52	0.0058	154	0.645	0.994	17073	1
NUDT1	-6.57	6	-2.52	0.0058	155	0.645	0.994	17072	1
ALPI	-6.55	6	-2.52	0.00594	156	0.654	0.994	17071	1
MLX	-6.54	6	-2.51	0.00598	157	0.654	0.994	17070	1
NFU1	-2.67	1	-2.51	0.006	158	0.654	0.994	17069	1
FAM49A	-6.52	6	-2.51	0.0061	159	0.66	0.994	17068	1
PAGE4	-2.66	1	-2.5	0.00613	160	0.66	0.994	17067	1
PLEKHJ1	-6.5	6	-2.5	0.00624	161	0.667	0.994	17066	1
HAAO	-6.5	6	-2.5	0.00628	162	0.667	0.994	17065	1
PPP1R14C	-5.3	4	-2.49	0.00631	163	0.667	0.994	17064	1
FXYD7	-4.58	3	-2.49	0.00644	164	0.677	0.994	17063	1
OR6B3	-4.57	3	-2.48	0.00649	165	0.677	0.994	17062	1
LURAP1L	-5.25	4	-2.47	0.00673	166	0.698	0.993	17061	1
VSX2	-6.42	6	-2.46	0.00685	167	0.704	0.993	17060	1
ZDHHC19	-6.41	6	-2.46	0.00688	168	0.704	0.993	17059	1
ASIC1	-6.41	6	-2.46	0.00693	169	0.704	0.993	17058	1
ZNF76	-6.39	6	-2.46	0.00703	170	0.704	0.993	17057	1
SLC9A7	-6.39	6	-2.45	0.0071	171	0.704	0.993	17056	1
RRM2B	-5.83	5	-2.45	0.00714	172	0.704	0.993	17055	1
PDZRN4	-6.37	6	-2.45	0.00719	173	0.704	0.993	17054	1
NAB2	-6.37	6	-2.45	0.00719	174	0.704	0.993	17053	1
TIMP4	-6.37	6	-2.45	0.00719	175	0.704	0.993	17052	1
CSTL1	-5.2	4	-2.45	0.00721	176	0.704	0.993	17051	1
ZFYVE28	-6.37	6	-2.44	0.00726	177	0.704	0.993	17050	1
FABP7	-3.67	2	-2.44	0.00736	178	0.704	0.993	17049	1
GTF2E1	-6.35	6	-2.44	0.00737	179	0.704	0.993	17048	1
CBX4	-6.35	6	-2.44	0.00738	180	0.704	0.993	17047	1
SLC6A5	-6.34	6	-2.43	0.00748	181	0.704	0.993	17046	1
ZNF703	-6.34	6	-2.43	0.00749	182	0.704	0.993	17045	1
PRSS33	-6.33	6	-2.43	0.00757	183	0.704	0.992	17044	1
TRAIP	-6.33	6	-2.43	0.00758	184	0.704	0.992	17043	1
SCIN	-6.32	6	-2.43	0.00762	185	0.704	0.992	17042	1
DYRK1A	-6.32	6	-2.43	0.00762	186	0.704	0.992	17041	1
RNF149	-6.31	6	-2.42	0.00771	187	0.704	0.992	17040	1
KCNQ5	-6.31	6	-2.42	0.00771	188	0.704	0.992	17039	1
TAF5L	-6.31	6	-2.42	0.00774	189	0.704	0.992	17038	1
TCF7L2	-6.3	6	-2.42	0.00777	190	0.704	0.992	17037	1
PAQR6	-6.29	6	-2.42	0.00784	191	0.707	0.992	17036	1
TOM1	-6.29	6	-2.41	0.00789	192	0.707	0.992	17035	1
HELQ	-6.28	6	-2.41	0.00799	193	0.713	0.992	17034	1
SIN3B	-6.27	6	-2.41	0.00806	194	0.716	0.992	17033	1
FASTKD2	-4.41	3	-2.4	0.0083	195	0.724	0.992	17032	1
IFNB1	-4.41	3	-2.39	0.00833	196	0.724	0.992	17031	1
C12orf44	-6.24	6	-2.39	0.00833	197	0.724	0.992	17030	1
COLEC11	-6.23	6	-2.39	0.00844	198	0.724	0.992	17029	1
FANCB	-6.22	6	-2.39	0.00853	199	0.724	0.991	17028	1
PLXNB3	-6.22	6	-2.38	0.00855	200	0.724	0.991	17027	1
RAB25	-5.67	5	-2.38	0.00859	201	0.724	0.991	17026	1
PYDC1	-5.07	4	-2.38	0.00861	202	0.724	0.991	17025	1
ADAM29	-5.07	4	-2.38	0.00866	203	0.724	0.991	17024	1
ZUFSP	-4.38	3	-2.38	0.00869	204	0.724	0.991	17023	1
HSD11B1	-6.2	6	-2.38	0.0087	205	0.724	0.991	17022	1
LY86	-3.58	2	-2.38	0.00871	206	0.724	0.991	17021	1
CACNG4	-6.2	6	-2.38	0.00871	207	0.724	0.991	17020	1
ANKRD33	-6.19	6	-2.37	0.0088	208	0.728	0.991	17019	1
TAF6L	-6.18	6	-2.37	0.00885	209	0.729	0.991	17018	1
SPP2	-6.15	6	-2.36	0.00917	210	0.747	0.991	17017	1
COX4I2	-6.15	6	-2.36	0.00918	211	0.747	0.991	17016	1
RETSAT	-6.15	6	-2.36	0.00919	212	0.747	0.991	17015	1
ADAM20	-5.01	4	-2.36	0.00925	213	0.748	0.991	17014	1
ZNF654	-3.54	2	-2.35	0.0094	214	0.75	0.991	17013	1
TMEM160	-6.12	6	-2.35	0.00941	215	0.75	0.991	17012	1
TCTE3	-5.59	5	-2.35	0.00945	216	0.75	0.991	17011	1
EHBP1L1	-6.12	6	-2.35	0.00948	217	0.75	0.991	17010	1
ZCCHC11	-6.12	6	-2.35	0.0095	218	0.75	0.99	17009	1
CAPN1	-6.11	6	-2.34	0.00954	219	0.75	0.99	17008	1
ZNF281	-6.1	6	-2.34	0.00969	220	0.759	0.99	17007	1
SGPP2	-6.09	6	-2.33	0.00981	221	0.762	0.99	17006	1
PYGB	-6.08	6	-2.33	0.00982	222	0.762	0.99	17005	1
RABGAP1L	-6.08	6	-2.33	0.00988	223	0.763	0.99	17004	1
ADAMTSL5	-6.07	6	-2.33	0.00993	224	0.764	0.99	17003	1
NCALD	-6.06	6	-2.32	0.0101	225	0.769	0.99	17002	1
COX6B2	-4.94	4	-2.32	0.0101	226	0.769	0.99	17001	1
ST3GAL1	-6.05	6	-2.32	0.0102	227	0.769	0.99	17000	1
CCNO	-6.05	6	-2.32	0.0102	228	0.769	0.99	16999	1
OR52E4	-4.28	3	-2.32	0.0102	229	0.769	0.99	16998	1
C15orf56	-5.51	5	-2.32	0.0103	230	0.77	0.99	16997	1
AKAP4	-6.03	6	-2.31	0.0104	231	0.773	0.99	16996	1
HEXIM1	-4.92	4	-2.31	0.0104	232	0.773	0.99	16995	1
C19orf44	-6.02	6	-2.31	0.0105	233	0.773	0.99	16994	1
PTPRN	-6.01	6	-2.31	0.0106	234	0.773	0.989	16993	1
GABARAP	-2.45	1	-2.3	0.0107	235	0.773	0.989	16992	1
ISOC1	-6.01	6	-2.3	0.0107	236	0.773	0.989	16991	1
RAD21L1	-3.47	2	-2.3	0.0107	237	0.773	0.989	16990	1
FIZ1	-5.99	6	-2.3	0.0108	238	0.773	0.989	16989	1
ASCC1	-5.47	5	-2.3	0.0109	239	0.773	0.989	16988	1
CISD2	-4.89	4	-2.29	0.0109	240	0.773	0.989	16987	1
SPRY2	-5.99	6	-2.29	0.0109	241	0.773	0.989	16986	1
KTI12	-5.46	5	-2.29	0.0109	242	0.773	0.989	16985	1
ADAMTS18	-5.98	6	-2.29	0.011	243	0.773	0.989	16984	1
C19orf25	-5.46	5	-2.29	0.011	244	0.773	0.989	16983	1
LRRC38	-5.98	6	-2.29	0.011	245	0.773	0.989	16982	1
PLSCR2	-3.44	2	-2.29	0.0111	246	0.777	0.989	16981	1
SUSD5	-5.96	6	-2.29	0.0111	247	0.777	0.989	16980	1
FAM46C	-4.87	4	-2.28	0.0112	248	0.777	0.989	16979	1
TNIP1	-5.94	6	-2.27	0.0115	249	0.792	0.989	16978	1
CIC	-5.93	6	-2.27	0.0116	250	0.792	0.988	16977	1
PPP1R1A	-5.93	6	-2.27	0.0116	251	0.792	0.988	16976	1
ZNF311	-5.92	6	-2.27	0.0116	252	0.792	0.988	16975	1
ADORA2B	-5.92	6	-2.27	0.0117	253	0.792	0.988	16974	1
SNX15	-5.91	6	-2.26	0.0118	254	0.792	0.988	16973	1
ZDHHC24	-5.91	6	-2.26	0.0118	255	0.792	0.988	16972	1
CPNE8	-4.18	3	-2.26	0.0118	256	0.792	0.988	16971	1
SPSB3	-5.91	6	-2.26	0.0118	257	0.792	0.988	16970	1
PLLP	-5.38	5	-2.26	0.0119	258	0.797	0.988	16969	1
HERPUD1	-5.88	6	-2.25	0.0122	259	0.803	0.988	16968	1
GAS7	-5.88	6	-2.25	0.0122	260	0.803	0.988	16967	1
FAM196A	-5.36	5	-2.25	0.0122	261	0.803	0.988	16966	1
GALNT6	-5.87	6	-2.25	0.0123	262	0.803	0.988	16965	1
MCM8	-5.87	6	-2.25	0.0123	263	0.803	0.988	16964	1
C9	-4.79	4	-2.25	0.0123	264	0.803	0.988	16963	1
TMEM134	-5.86	6	-2.25	0.0124	265	0.803	0.988	16962	1
DNAJB13	-5.86	6	-2.24	0.0124	266	0.803	0.988	16961	1
PLEKHG4	-5.86	6	-2.24	0.0124	267	0.803	0.988	16960	1
ALDH3B2	-4.13	3	-2.24	0.0126	268	0.808	0.987	16959	1
SLC6A19	-5.84	6	-2.24	0.0126	269	0.808	0.987	16958	1
JMJD7	-5.83	6	-2.23	0.0128	270	0.815	0.987	16957	1
STK19	-5.82	6	-2.23	0.0129	271	0.815	0.987	16956	1
GJB6	-5.81	6	-2.22	0.013	272	0.815	0.987	16955	1
PTRH1	-5.81	6	-2.22	0.0131	273	0.815	0.987	16954	1
PRPH2	-5.8	6	-2.22	0.0131	274	0.815	0.987	16953	1
UBALD1	-5.3	5	-2.22	0.0132	275	0.815	0.987	16952	1
C3orf70	-5.8	6	-2.22	0.0132	276	0.815	0.987	16951	1
ERCC3	-5.8	6	-2.22	0.0132	277	0.815	0.987	16950	1
HRH3	-5.8	6	-2.22	0.0132	278	0.815	0.987	16949	1
PALMD	-4.73	4	-2.22	0.0133	279	0.815	0.987	16948	1
MUC22	-5.79	6	-2.22	0.0133	280	0.815	0.987	16947	1
GALR1	-5.78	6	-2.21	0.0135	281	0.815	0.987	16946	1
RBM46	-5.78	6	-2.21	0.0135	282	0.815	0.987	16945	1
NLRP10	-5.77	6	-2.21	0.0135	283	0.815	0.986	16944	1
RMDN3	-5.77	6	-2.21	0.0136	284	0.815	0.986	16943	1
DAZL	-3.33	2	-2.21	0.0136	285	0.815	0.986	16942	1
STK17B	-4.08	3	-2.21	0.0136	286	0.815	0.986	16941	1
CYP27B1	-5.77	6	-2.21	0.0136	287	0.815	0.986	16940	1
CST9L	-4.08	3	-2.21	0.0136	288	0.815	0.986	16939	1
LPA	-5.75	6	-2.2	0.0138	289	0.821	0.986	16938	1
INHBC	-5.75	6	-2.2	0.0139	290	0.821	0.986	16937	1
CPN2	-5.75	6	-2.2	0.0139	291	0.821	0.986	16936	1
ZSCAN25	-5.75	6	-2.2	0.0139	292	0.822	0.986	16935	1
UVSSA	-5.73	6	-2.19	0.0141	293	0.824	0.986	16934	1
PRKAG2	-5.73	6	-2.19	0.0142	294	0.824	0.986	16933	1
DDX20	-5.72	6	-2.19	0.0143	295	0.824	0.986	16932	1
LIN28A	-2.33	1	-2.19	0.0143	296	0.824	0.986	16931	1
TMC8	-5.71	6	-2.19	0.0144	297	0.824	0.986	16930	1
GGN	-5.71	6	-2.18	0.0144	298	0.824	0.986	16929	1
RSPO3	-3.3	2	-2.18	0.0144	299	0.824	0.986	16928	1
OPTC	-5.71	6	-2.18	0.0145	300	0.824	0.986	16927	1
SLC25A19	-5.7	6	-2.18	0.0146	301	0.824	0.985	16926	1
RIPK4	-5.2	5	-2.18	0.0146	302	0.824	0.985	16925	1
SAMD1	-5.7	6	-2.18	0.0146	303	0.824	0.985	16924	1
TMEM120B	-5.69	6	-2.18	0.0147	304	0.824	0.985	16923	1
C2orf69	-4.65	4	-2.18	0.0147	305	0.824	0.985	16922	1
RBBP7	-5.69	6	-2.18	0.0148	306	0.824	0.985	16921	1
COL4A3	-5.68	6	-2.17	0.0148	307	0.824	0.985	16920	1
C11orf16	-5.68	6	-2.17	0.0149	308	0.824	0.985	16919	1
SLC19A1	-5.68	6	-2.17	0.0149	309	0.824	0.985	16918	1
RECQL5	-5.67	6	-2.17	0.015	310	0.824	0.985	16917	1
B3GNT6	-5.67	6	-2.17	0.015	311	0.824	0.985	16916	1
ATAD5	-5.67	6	-2.17	0.015	312	0.824	0.985	16915	1
PIRT	-4.01	3	-2.17	0.015	313	0.824	0.985	16914	1
VTI1A	-5.67	6	-2.17	0.015	314	0.825	0.985	16913	1
DBNL	-5.66	6	-2.17	0.0151	315	0.825	0.985	16912	1
HNRNPH3	-5.66	6	-2.17	0.0152	316	0.825	0.985	16911	1
TBP	-5.17	5	-2.17	0.0152	317	0.825	0.985	16910	1
RNF128	-5.65	6	-2.16	0.0153	318	0.827	0.985	16909	1
SOAT2	-5.65	6	-2.16	0.0153	319	0.827	0.985	16908	1
TMEM126A	-3.99	3	-2.16	0.0154	320	0.827	0.985	16907	1
SLCO1B1	-3.26	2	-2.16	0.0155	321	0.827	0.985	16906	1
DENND3	-5.64	6	-2.16	0.0155	322	0.827	0.985	16905	1
RAD52	-5.64	6	-2.16	0.0155	323	0.827	0.984	16904	1
SPDYE3	-3.25	2	-2.16	0.0156	324	0.827	0.984	16903	1
NOTO	-5.63	6	-2.15	0.0156	325	0.827	0.984	16902	1
TUSC1	-4.59	4	-2.15	0.0157	326	0.827	0.984	16901	1
ZER1	-5.63	6	-2.15	0.0157	327	0.827	0.984	16900	1
CUX1	-5.62	6	-2.15	0.0158	328	0.827	0.984	16899	1
SLC25A22	-5.61	6	-2.15	0.0159	329	0.827	0.984	16898	1
PDCD6	-5.61	6	-2.15	0.0159	330	0.827	0.984	16897	1
USP39	-5.61	6	-2.15	0.016	331	0.827	0.984	16896	1
PANX3	-5.61	6	-2.14	0.016	332	0.827	0.984	16895	1
RBPJL	-5.6	6	-2.14	0.016	333	0.827	0.984	16894	1
AGT	-5.11	5	-2.14	0.0161	334	0.827	0.984	16893	1
ADAMTS4	-5.6	6	-2.14	0.0161	335	0.827	0.984	16892	1
PHF7	-5.6	6	-2.14	0.0162	336	0.829	0.984	16891	1
SLC36A4	-5.08	5	-2.13	0.0166	337	0.839	0.983	16890	1
IFNGR2	-5.57	6	-2.13	0.0166	338	0.839	0.983	16889	1
ACBD4	-5.57	6	-2.13	0.0167	339	0.839	0.983	16888	1
FAM161B	-5.57	6	-2.13	0.0167	340	0.839	0.983	16887	1
CACNB2	-5.56	6	-2.13	0.0167	341	0.839	0.983	16886	1
TPM2	-5.56	6	-2.13	0.0167	342	0.839	0.983	16885	1
CNIH4	-5.08	5	-2.13	0.0167	343	0.839	0.983	16884	1
KRTAP22-1	-4.54	4	-2.13	0.0168	344	0.839	0.983	16883	1
SLC29A1	-5.55	6	-2.12	0.017	345	0.842	0.983	16882	1
SLC20A1	-5.55	6	-2.12	0.017	346	0.842	0.983	16881	1
AMICA1	-5.54	6	-2.12	0.017	347	0.842	0.983	16880	1
OR51T1	-3.92	3	-2.12	0.0171	348	0.842	0.983	16879	1
MEDAG	-5.53	6	-2.12	0.0172	349	0.842	0.983	16878	1
DCAF15	-5.53	6	-2.12	0.0172	350	0.842	0.983	16877	1
CRISPLD2	-5.53	6	-2.11	0.0173	351	0.842	0.983	16876	1
SPIRE1	-5.53	6	-2.11	0.0173	352	0.842	0.983	16875	1
TTPA	-5.53	6	-2.11	0.0173	353	0.842	0.983	16874	1
RANBP3L	-4.51	4	-2.11	0.0173	354	0.842	0.983	16873	1
MADCAM1	-5.04	5	-2.11	0.0174	355	0.842	0.983	16872	1
DSCAML1	-5.52	6	-2.11	0.0175	356	0.846	0.983	16871	1
CD93	-5.51	6	-2.1	0.0176	357	0.852	0.982	16870	1
LRFN3	-5.49	6	-2.1	0.0179	358	0.852	0.982	16869	1
PHF8	-5.49	6	-2.1	0.0179	359	0.852	0.982	16868	1
FEM1B	-5.49	6	-2.1	0.0179	360	0.852	0.982	16867	1
GOLGA1	-5.49	6	-2.1	0.018	361	0.852	0.982	16866	1
ZNF319	-4.48	4	-2.1	0.018	362	0.852	0.982	16865	1
CNOT3	-5.48	6	-2.1	0.0181	363	0.852	0.982	16864	1
BCO2	-5.48	6	-2.1	0.0181	364	0.852	0.982	16863	1
GZMK	-4.48	4	-2.09	0.0181	365	0.852	0.982	16862	1
DLX1	-5.48	6	-2.09	0.0181	366	0.852	0.982	16861	1
TBX22	-5.48	6	-2.09	0.0182	367	0.852	0.982	16860	1
SH3BGRL3	-3.16	2	-2.09	0.0182	368	0.852	0.982	16859	1
QARS	-5.47	6	-2.09	0.0184	369	0.857	0.982	16858	1
SLC7A11	-5.46	6	-2.09	0.0185	370	0.857	0.982	16857	1
RC3H1	-5.46	6	-2.09	0.0185	371	0.857	0.982	16856	1
PCDH9	-5.46	6	-2.08	0.0185	372	0.857	0.981	16855	1
KRT38	-4.98	5	-2.08	0.0186	373	0.857	0.981	16854	1
ECEL1	-5.45	6	-2.08	0.0186	374	0.857	0.981	16853	1
GPAA1	-5.45	6	-2.08	0.0187	375	0.859	0.981	16852	1
RGL3	-5.44	6	-2.08	0.0189	376	0.863	0.981	16851	1
MROH2A	-5.44	6	-2.08	0.0189	377	0.863	0.981	16850	1
C1orf94	-5.43	6	-2.07	0.0191	378	0.866	0.981	16849	1
NSUN5	-5.43	6	-2.07	0.0191	379	0.866	0.981	16848	1
ZNF267	-2.21	1	-2.07	0.0191	380	0.866	0.981	16847	1
TLE6	-5.42	6	-2.07	0.0192	381	0.866	0.981	16846	1
NKX2-2	-5.42	6	-2.07	0.0193	382	0.869	0.981	16845	1
TMEM147	-5.41	6	-2.07	0.0193	383	0.87	0.981	16844	1
PAQR8	-5.41	6	-2.07	0.0194	384	0.87	0.981	16843	1
LDHD	-5.39	6	-2.06	0.0197	385	0.88	0.98	16842	1
OR2Y1	-3.81	3	-2.06	0.0198	386	0.882	0.98	16841	1
FAM170B	-5.38	6	-2.05	0.02	387	0.888	0.98	16840	1
ARHGAP30	-5.37	6	-2.05	0.0201	388	0.888	0.98	16839	1
ARF5	-4.39	4	-2.05	0.0201	389	0.888	0.98	16838	1
SCNN1B	-5.37	6	-2.05	0.0201	390	0.888	0.98	16837	1
USP11	-5.37	6	-2.05	0.0202	391	0.888	0.98	16836	1
SH2B2	-5.36	6	-2.05	0.0203	392	0.888	0.98	16835	1
ACCSL	-5.36	6	-2.05	0.0203	393	0.888	0.98	16834	1
TUBE1	-3.79	3	-2.05	0.0203	394	0.888	0.98	16833	1
HRASLS5	-5.36	6	-2.05	0.0204	395	0.889	0.98	16832	1
SFXN2	-5.35	6	-2.04	0.0204	396	0.889	0.98	16831	1
OR2W1	-2.18	1	-2.04	0.0205	397	0.889	0.98	16830	1
RBM19	-5.34	6	-2.04	0.0207	398	0.891	0.979	16829	1
FRMD8	-5.34	6	-2.04	0.0207	399	0.891	0.979	16828	1
SRSF5	-5.34	6	-2.04	0.0208	400	0.891	0.979	16827	1
HLTF	-3.77	3	-2.04	0.0208	401	0.891	0.979	16826	1
TBX1	-5.33	6	-2.04	0.0208	402	0.891	0.979	16825	1
LECT2	-5.33	6	-2.04	0.0209	403	0.891	0.979	16824	1
RBBP8	-5.33	6	-2.04	0.0209	404	0.891	0.979	16823	1
SRPR	-5.32	6	-2.03	0.0211	405	0.893	0.979	16822	1
FIP1L1	-5.32	6	-2.03	0.0211	406	0.893	0.979	16821	1
TTK	-3.07	2	-2.03	0.0212	407	0.893	0.979	16820	1
ACN9	-3.76	3	-2.03	0.0213	408	0.893	0.979	16819	1
C9orf114	-5.31	6	-2.03	0.0213	409	0.893	0.979	16818	1
ZNF697	-5.31	6	-2.03	0.0213	410	0.893	0.979	16817	1
IGFL4	-4.33	4	-2.03	0.0214	411	0.893	0.979	16816	1
AMPH	-5.31	6	-2.03	0.0214	412	0.893	0.979	16815	1
TFPT	-5.31	6	-2.03	0.0214	413	0.893	0.979	16814	1
GDPD2	-5.3	6	-2.02	0.0215	414	0.894	0.978	16813	1
ANKRD32	-5.29	6	-2.02	0.0217	415	0.894	0.978	16812	1
PLD4	-5.29	6	-2.02	0.0217	416	0.894	0.978	16811	1
CLPP	-5.29	6	-2.02	0.0217	417	0.894	0.978	16810	1
ICK	-5.29	6	-2.02	0.0217	418	0.894	0.978	16809	1
ADRA1D	-5.29	6	-2.02	0.0218	419	0.894	0.978	16808	1
CELF3	-5.28	6	-2.02	0.0219	420	0.894	0.978	16807	1
PRKACG	-4.82	5	-2.02	0.0219	421	0.894	0.978	16806	1
ADAMTS15	-5.28	6	-2.01	0.022	422	0.894	0.978	16805	1
ZNF236	-5.28	6	-2.01	0.022	423	0.894	0.978	16804	1
EFCC1	-5.28	6	-2.01	0.022	424	0.894	0.978	16803	1
MLPH	-5.27	6	-2.01	0.0221	425	0.894	0.978	16802	1
HEXIM2	-5.27	6	-2.01	0.0222	426	0.894	0.978	16801	1
MIEN1	-4.81	5	-2.01	0.0222	427	0.894	0.978	16800	1
PIGF	-3.04	2	-2.01	0.0222	428	0.894	0.978	16799	1
C5orf51	-4.8	5	-2.01	0.0223	429	0.896	0.978	16798	1
ZNF653	-5.26	6	-2.01	0.0224	430	0.896	0.978	16797	1
AKNA	-5.26	6	-2.01	0.0224	431	0.896	0.978	16796	1
FOXP4	-5.24	6	-2	0.0227	432	0.905	0.977	16795	1
SLC25A25	-5.24	6	-2	0.0227	433	0.905	0.977	16794	1
TTPAL	-4.77	5	-2	0.023	434	0.911	0.977	16793	1
CX3CL1	-4.77	5	-2	0.023	435	0.911	0.977	16792	1
KIAA0556	-5.21	6	-1.99	0.0234	436	0.922	0.977	16791	1
IGSF11	-5.21	6	-1.99	0.0235	437	0.922	0.977	16790	1
TCEAL4	-4.24	4	-1.98	0.0237	438	0.922	0.976	16789	1
C1orf106	-5.19	6	-1.98	0.0238	439	0.922	0.976	16788	1
NEK9	-5.19	6	-1.98	0.0239	440	0.922	0.976	16787	1
FLNC	-5.19	6	-1.98	0.0239	441	0.922	0.976	16786	1
RORA	-5.19	6	-1.98	0.024	442	0.922	0.976	16785	1
RPRD1B	-5.18	6	-1.98	0.024	443	0.922	0.976	16784	1
IDUA	-4.73	5	-1.98	0.024	444	0.922	0.976	16783	1
OTX1	-5.18	6	-1.98	0.0241	445	0.922	0.976	16782	1
GALNT12	-5.18	6	-1.98	0.0241	446	0.922	0.976	16781	1
GNMT	-5.18	6	-1.97	0.0242	447	0.922	0.976	16780	1
RPS15	-4.72	5	-1.97	0.0242	448	0.922	0.976	16779	1
ZBTB20	-5.17	6	-1.97	0.0243	449	0.922	0.976	16778	1
ZKSCAN1	-5.16	6	-1.97	0.0245	450	0.922	0.976	16777	1
PPT2	-5.16	6	-1.97	0.0245	451	0.922	0.976	16776	1
OSBP2	-5.16	6	-1.97	0.0245	452	0.922	0.975	16775	1
APOBEC2	-4.71	5	-1.97	0.0245	453	0.922	0.975	16774	1
VNN1	-5.16	6	-1.97	0.0245	454	0.922	0.975	16773	1
LRRC61	-4.71	5	-1.97	0.0246	455	0.922	0.975	16772	1
B3GALT5	-4.21	4	-1.97	0.0246	456	0.922	0.975	16771	1
TNF	-5.16	6	-1.97	0.0246	457	0.922	0.975	16770	1
CHTF18	-5.16	6	-1.97	0.0246	458	0.922	0.975	16769	1
MARC2	-5.15	6	-1.97	0.0247	459	0.922	0.975	16768	1
GCGR	-5.15	6	-1.97	0.0247	460	0.922	0.975	16767	1
OR13C8	-4.21	4	-1.96	0.0247	461	0.922	0.975	16766	1
LOXL4	-5.15	6	-1.96	0.0248	462	0.922	0.975	16765	1
XKRX	-5.15	6	-1.96	0.0248	463	0.922	0.975	16764	1
FAM199X	-5.15	6	-1.96	0.0249	464	0.922	0.975	16763	1
C1QL3	-4.69	5	-1.96	0.0249	465	0.922	0.975	16762	1
WAS	-5.14	6	-1.96	0.025	466	0.922	0.975	16761	1
GSK3A	-5.14	6	-1.96	0.025	467	0.922	0.975	16760	1
RASSF1	-5.14	6	-1.96	0.025	468	0.922	0.975	16759	1
CEP41	-5.13	6	-1.96	0.0253	469	0.926	0.975	16758	1
C5orf48	-2.96	2	-1.95	0.0253	470	0.926	0.975	16757	1
STAT5B	-5.13	6	-1.95	0.0253	471	0.926	0.975	16756	1
STARD9	-5.12	6	-1.95	0.0254	472	0.926	0.975	16755	1
PELI2	-5.12	6	-1.95	0.0255	473	0.926	0.975	16754	1
RPL8	-3.62	3	-1.95	0.0255	474	0.926	0.974	16753	1
UCKL1	-5.11	6	-1.95	0.0256	475	0.926	0.974	16752	1
HDAC5	-5.11	6	-1.95	0.0256	476	0.926	0.974	16751	1
ACOX3	-5.11	6	-1.95	0.0256	477	0.926	0.974	16750	1
SST	-4.17	4	-1.95	0.0257	478	0.926	0.974	16749	1
ELAC2	-5.11	6	-1.95	0.0258	479	0.926	0.974	16748	1
INPP5E	-5.11	6	-1.95	0.0258	480	0.926	0.974	16747	1
PKN1	-5.1	6	-1.94	0.026	481	0.93	0.974	16746	1
USP42	-5.1	6	-1.94	0.026	482	0.93	0.974	16745	1
ATXN2L	-5.09	6	-1.94	0.0261	483	0.93	0.974	16744	1
TMEM216	-4.65	5	-1.94	0.0262	484	0.93	0.974	16743	1
TEAD3	-5.09	6	-1.94	0.0262	485	0.93	0.974	16742	1
STYX	-2.93	2	-1.94	0.0264	486	0.931	0.974	16741	1
BHLHE40	-5.08	6	-1.94	0.0264	487	0.931	0.974	16740	1
C8orf47	-4.64	5	-1.94	0.0264	488	0.931	0.974	16739	1
CXCL11	-2.93	2	-1.94	0.0265	489	0.932	0.974	16738	1
PLCD3	-5.07	6	-1.93	0.0266	490	0.932	0.973	16737	1
TWF2	-5.07	6	-1.93	0.0267	491	0.932	0.973	16736	1
NAA38	-2.07	1	-1.93	0.0267	492	0.932	0.973	16735	1
C10orf99	-3.58	3	-1.93	0.0267	493	0.932	0.973	16734	1
XG	-3.58	3	-1.93	0.0268	494	0.932	0.973	16733	1
AKR1E2	-5.06	6	-1.93	0.0269	495	0.932	0.973	16732	1
CYR61	-5.06	6	-1.93	0.0269	496	0.932	0.973	16731	1
ACSL3	-5.06	6	-1.93	0.027	497	0.932	0.973	16730	1
KIAA1199	-5.06	6	-1.93	0.027	498	0.932	0.973	16729	1
WBP11	-2.06	1	-1.93	0.0271	499	0.932	0.973	16728	1
NAPEPLD	-5.05	6	-1.93	0.0271	500	0.932	0.973	16727	1
LCN6	-5.05	6	-1.92	0.0272	501	0.936	0.973	16726	1
CYP2S1	-5.04	6	-1.92	0.0273	502	0.937	0.973	16725	1
TTC12	-5.04	6	-1.92	0.0275	503	0.938	0.973	16724	1
NUDT14	-5.03	6	-1.92	0.0277	504	0.938	0.972	16723	1
KCMF1	-5.02	6	-1.91	0.0278	505	0.938	0.972	16722	1
SLC29A2	-5.02	6	-1.91	0.0278	506	0.938	0.972	16721	1
HAS3	-5.02	6	-1.91	0.0278	507	0.938	0.972	16720	1
PSMB10	-5.02	6	-1.91	0.0279	508	0.938	0.972	16719	1
RPP25	-5.02	6	-1.91	0.0279	509	0.938	0.972	16718	1
PCYT1A	-5.02	6	-1.91	0.028	510	0.938	0.972	16717	1
TMEM37	-5.02	6	-1.91	0.028	511	0.938	0.972	16716	1
ANLN	-5.01	6	-1.91	0.028	512	0.938	0.972	16715	1
CCR1	-5.01	6	-1.91	0.028	513	0.938	0.972	16714	1
HSPB2	-5.01	6	-1.91	0.028	514	0.938	0.972	16713	1
DNAJB6	-3.54	3	-1.91	0.0281	515	0.938	0.972	16712	1
C16orf54	-4.09	4	-1.91	0.0281	516	0.938	0.972	16711	1
CD109	-5.01	6	-1.91	0.0282	517	0.938	0.972	16710	1
ACTL6B	-5.01	6	-1.91	0.0282	518	0.938	0.972	16709	1
CDKL2	-5	6	-1.91	0.0283	519	0.938	0.972	16708	1
KIAA1598	-5	6	-1.9	0.0284	520	0.938	0.972	16707	1
SDK1	-5	6	-1.9	0.0284	521	0.938	0.972	16706	1
ARHGEF40	-5	6	-1.9	0.0285	522	0.938	0.972	16705	1
LRRC45	-5	6	-1.9	0.0285	523	0.938	0.972	16704	1
LHFP	-4.56	5	-1.9	0.0286	524	0.938	0.971	16703	1
WNT10A	-4.99	6	-1.9	0.0286	525	0.938	0.971	16702	1
YBX2	-3.53	3	-1.9	0.0286	526	0.938	0.971	16701	1
POU2F3	-4.99	6	-1.9	0.0288	527	0.94	0.971	16700	1
RGS7	-4.98	6	-1.9	0.0289	528	0.942	0.971	16699	1
DYRK3	-4.98	6	-1.9	0.029	529	0.942	0.971	16698	1
SLIT2	-4.98	6	-1.9	0.029	530	0.942	0.971	16697	1
LSM14A	-4.97	6	-1.89	0.0291	531	0.943	0.971	16696	1
S100A4	-2.03	1	-1.89	0.0291	532	0.943	0.971	16695	1
ANKRD16	-4.97	6	-1.89	0.0292	533	0.943	0.971	16694	1
CHAD	-4.97	6	-1.89	0.0292	534	0.943	0.971	16693	1
CGA	-2.86	2	-1.89	0.0294	535	0.945	0.971	16692	1
RABEPK	-4.96	6	-1.89	0.0294	536	0.945	0.971	16691	1
UNC5B	-4.96	6	-1.89	0.0295	537	0.945	0.97	16690	1
GBA2	-4.96	6	-1.89	0.0296	538	0.945	0.97	16689	1
KITLG	-3.5	3	-1.89	0.0296	539	0.945	0.97	16688	1
KMO	-4.52	5	-1.89	0.0297	540	0.946	0.97	16687	1
EP300	-4.94	6	-1.88	0.0299	541	0.951	0.97	16686	1
MEGF6	-4.94	6	-1.88	0.0299	542	0.951	0.97	16685	1
AP1M1	-4.94	6	-1.88	0.03	543	0.951	0.97	16684	1
BPIFB6	-4.94	6	-1.88	0.03	544	0.951	0.97	16683	1
CPSF2	-4.94	6	-1.88	0.0301	545	0.951	0.97	16682	1
TMEM56	-2.85	2	-1.88	0.0303	546	0.953	0.97	16681	1
PDLIM3	-4.93	6	-1.88	0.0303	547	0.953	0.97	16680	1
SLC5A4	-4.93	6	-1.88	0.0303	548	0.953	0.97	16679	1
PTHLH	-4.92	6	-1.87	0.0304	549	0.954	0.97	16678	1
PRSS50	-4.92	6	-1.87	0.0305	550	0.954	0.97	16677	1
C9orf89	-4.92	6	-1.87	0.0306	551	0.956	0.969	16676	1
CHRAC1	-4.01	4	-1.87	0.0309	552	0.959	0.969	16675	1
HPSE2	-4.9	6	-1.87	0.031	553	0.959	0.969	16674	1
ELAVL3	-4.9	6	-1.87	0.0311	554	0.959	0.969	16673	1
GPER	-4.47	5	-1.86	0.0311	555	0.959	0.969	16672	1
HSF2	-3.46	3	-1.86	0.0311	556	0.959	0.969	16671	1
ASTL	-4.9	6	-1.86	0.0311	557	0.959	0.969	16670	1
CXorf61	-2	1	-1.86	0.0312	558	0.959	0.969	16669	1
TGFA	-4.47	5	-1.86	0.0312	559	0.959	0.969	16668	1
KDELR1	-4.89	6	-1.86	0.0312	560	0.959	0.969	16667	1
KAZN	-4.89	6	-1.86	0.0312	561	0.959	0.969	16666	1
BTBD1	-4.89	6	-1.86	0.0313	562	0.959	0.969	16665	1
SFT2D1	-4.46	5	-1.86	0.0314	563	0.959	0.969	16664	1
LDLRAD2	-4.89	6	-1.86	0.0314	564	0.959	0.969	16663	1
SMPD1	-4.89	6	-1.86	0.0315	565	0.959	0.969	16662	1
ERGIC1	-4.88	6	-1.86	0.0315	566	0.959	0.968	16661	1
ATG4B	-4.88	6	-1.86	0.0316	567	0.959	0.968	16660	1
CERS6	-4.88	6	-1.86	0.0316	568	0.959	0.968	16659	1
TSC22D1	-4.88	6	-1.86	0.0317	569	0.959	0.968	16658	1
ZNF142	-4.87	6	-1.85	0.0319	570	0.965	0.968	16657	1
DNTTIP2	-4.87	6	-1.85	0.032	571	0.965	0.968	16656	1
DTD1	-4.87	6	-1.85	0.032	572	0.965	0.968	16655	1
GLE1	-4.86	6	-1.85	0.0321	573	0.965	0.968	16654	1
RASSF4	-4.86	6	-1.85	0.0321	574	0.965	0.968	16653	1
PIAS3	-4.86	6	-1.85	0.0323	575	0.965	0.968	16652	1
CTSL2	-4.43	5	-1.85	0.0323	576	0.965	0.968	16651	1
TPBG	-4.85	6	-1.85	0.0324	577	0.967	0.968	16650	1
TMEM125	-3.96	4	-1.84	0.0325	578	0.968	0.967	16649	1
PTX4	-4.85	6	-1.84	0.0325	579	0.968	0.967	16648	1
ZMIZ2	-4.84	6	-1.84	0.0329	580	0.97	0.967	16647	1
ABCD1	-4.83	6	-1.84	0.033	581	0.97	0.967	16646	1
CXXC4	-4.83	6	-1.84	0.033	582	0.97	0.967	16645	1
C2orf88	-2.79	2	-1.84	0.0331	583	0.97	0.967	16644	1
TSPAN5	-3.94	4	-1.84	0.0332	584	0.97	0.967	16643	1
FGD5	-4.82	6	-1.84	0.0333	585	0.97	0.967	16642	1
CADPS	-4.82	6	-1.83	0.0333	586	0.97	0.967	16641	1
SIDT1	-4.82	6	-1.83	0.0334	587	0.97	0.967	16640	1
TCHH	-4.82	6	-1.83	0.0334	588	0.97	0.967	16639	1
PPP4R4	-4.82	6	-1.83	0.0334	589	0.97	0.967	16638	1
PTPRN2	-4.82	6	-1.83	0.0334	590	0.97	0.967	16637	1
HS3ST2	-4.81	6	-1.83	0.0336	591	0.97	0.966	16636	1
HSD3B7	-4.81	6	-1.83	0.0336	592	0.97	0.966	16635	1
SLC2A4	-4.81	6	-1.83	0.0336	593	0.97	0.966	16634	1
POSTN	-4.81	6	-1.83	0.0337	594	0.97	0.966	16633	1
CHPF2	-4.81	6	-1.83	0.0338	595	0.97	0.966	16632	1
STMN3	-4.39	5	-1.83	0.0338	596	0.97	0.966	16631	1
CEACAM3	-2.77	2	-1.83	0.0338	597	0.97	0.966	16630	1
SYT2	-4.8	6	-1.83	0.0338	598	0.97	0.966	16629	1
UBE2F	-3.4	3	-1.83	0.0338	599	0.97	0.966	16628	1
CYSLTR2	-3.4	3	-1.83	0.0339	600	0.97	0.966	16627	1
IDH1	-1.96	1	-1.83	0.0339	601	0.97	0.966	16626	1
NLRP3	-4.8	6	-1.83	0.0339	602	0.97	0.966	16625	1
NHEJ1	-4.38	5	-1.82	0.034	603	0.97	0.966	16624	1
EPHX3	-4.79	6	-1.82	0.0343	604	0.97	0.966	16623	1
AMIGO3	-4.79	6	-1.82	0.0343	605	0.97	0.966	16622	1
PPAN	-4.78	6	-1.82	0.0344	606	0.97	0.966	16621	1
COL10A1	-4.78	6	-1.82	0.0344	607	0.97	0.966	16620	1
SMYD2	-4.78	6	-1.82	0.0344	608	0.97	0.966	16619	1
FAM170A	-4.78	6	-1.82	0.0344	609	0.97	0.966	16618	1
SLC4A1AP	-4.78	6	-1.82	0.0345	610	0.97	0.966	16617	1
FAM78B	-4.78	6	-1.82	0.0345	611	0.97	0.965	16616	1
C12orf52	-4.78	6	-1.82	0.0346	612	0.97	0.965	16615	1
FANCM	-4.78	6	-1.82	0.0346	613	0.97	0.965	16614	1
ICAM3	-4.78	6	-1.82	0.0346	614	0.97	0.965	16613	1
ANKMY2	-4.78	6	-1.82	0.0346	615	0.97	0.965	16612	1
PLEKHB1	-4.77	6	-1.82	0.0347	616	0.971	0.965	16611	1
ATXN1	-4.77	6	-1.81	0.0348	617	0.972	0.965	16610	1
VWF	-4.76	6	-1.81	0.0351	618	0.974	0.965	16609	1
ZNF345	-2.75	2	-1.81	0.0352	619	0.974	0.965	16608	1
GPR56	-4.76	6	-1.81	0.0352	620	0.974	0.965	16607	1
DLG4	-4.75	6	-1.81	0.0353	621	0.974	0.965	16606	1
UBE2E1	-4.75	6	-1.81	0.0354	622	0.974	0.965	16605	1
AP5B1	-4.34	5	-1.81	0.0354	623	0.974	0.965	16604	1
MYLK	-4.75	6	-1.81	0.0355	624	0.974	0.965	16603	1
SNRK	-4.75	6	-1.8	0.0356	625	0.974	0.964	16602	1
EPHB4	-4.74	6	-1.8	0.0357	626	0.974	0.964	16601	1
DRAXIN	-4.74	6	-1.8	0.0357	627	0.974	0.964	16600	1
DEFB134	-1.93	1	-1.8	0.0358	628	0.974	0.964	16599	1
C20orf112	-4.74	6	-1.8	0.0359	629	0.974	0.964	16598	1
SAMD10	-4.74	6	-1.8	0.0359	630	0.974	0.964	16597	1
ITGAE	-4.74	6	-1.8	0.0359	631	0.974	0.964	16596	1
OR1A2	-1.93	1	-1.8	0.0359	632	0.974	0.964	16595	1
GRIP1	-4.73	6	-1.8	0.0361	633	0.974	0.964	16594	1
LTBP2	-4.73	6	-1.8	0.0361	634	0.974	0.964	16593	1
SEPT3	-4.73	6	-1.8	0.0361	635	0.974	0.964	16592	1
LRRC49	-4.73	6	-1.8	0.0362	636	0.974	0.964	16591	1
SEC14L3	-4.73	6	-1.8	0.0362	637	0.974	0.964	16590	1
OR13A1	-4.73	6	-1.8	0.0362	638	0.974	0.964	16589	1
MYH4	-4.73	6	-1.8	0.0362	639	0.974	0.964	16588	1
TMEM40	-4.72	6	-1.8	0.0362	640	0.974	0.964	16587	1
UTP14A	-4.72	6	-1.8	0.0363	641	0.974	0.964	16586	1
PDE3B	-4.72	6	-1.8	0.0363	642	0.974	0.964	16585	1
TXNDC17	-4.72	6	-1.79	0.0364	643	0.974	0.964	16584	1
CLCN4	-4.72	6	-1.79	0.0364	644	0.974	0.964	16583	1
SCD	-1.93	1	-1.79	0.0365	645	0.974	0.964	16582	1
SIX1	-4.71	6	-1.79	0.0367	646	0.974	0.963	16581	1
DGCR8	-4.71	6	-1.79	0.0368	647	0.974	0.963	16580	1
NENF	-4.3	5	-1.79	0.0368	648	0.974	0.963	16579	1
CHML	-2.72	2	-1.79	0.0368	649	0.974	0.963	16578	1
ACTR6	-4.3	5	-1.79	0.0368	650	0.974	0.963	16577	1
NBEAL2	-4.71	6	-1.79	0.0368	651	0.974	0.963	16576	1
ZIC3	-4.7	6	-1.79	0.0369	652	0.974	0.963	16575	1
OCA2	-4.69	6	-1.78	0.0372	653	0.974	0.963	16574	1
THAP2	-3.82	4	-1.78	0.0375	654	0.974	0.962	16573	1
HAUS7	-4.68	6	-1.78	0.0376	655	0.974	0.962	16572	1
PHC3	-4.68	6	-1.78	0.0376	656	0.974	0.962	16571	1
DPH1	-4.68	6	-1.78	0.0377	657	0.974	0.962	16570	1
ACP6	-4.67	6	-1.78	0.0379	658	0.974	0.962	16569	1
CTSL1	-1.91	1	-1.78	0.0379	659	0.974	0.962	16568	1
NTNG2	-4.67	6	-1.78	0.0379	660	0.974	0.962	16567	1
VCL	-4.67	6	-1.77	0.038	661	0.974	0.962	16566	1
OR2G3	-4.26	5	-1.77	0.038	662	0.974	0.962	16565	1
TMEM108	-4.67	6	-1.77	0.038	663	0.974	0.962	16564	1
ATP5I	-3.3	3	-1.77	0.038	664	0.974	0.962	16563	1
DNAJC21	-4.67	6	-1.77	0.0381	665	0.974	0.962	16562	1
AKAP11	-4.26	5	-1.77	0.0381	666	0.974	0.962	16561	1
PLAG1	-4.26	5	-1.77	0.0381	667	0.974	0.962	16560	1
PAQR4	-4.66	6	-1.77	0.0382	668	0.974	0.962	16559	1
TFF1	-4.66	6	-1.77	0.0382	669	0.974	0.962	16558	1
USP26	-3.81	4	-1.77	0.0383	670	0.974	0.962	16557	1
CELF2	-4.66	6	-1.77	0.0383	671	0.974	0.962	16556	1
HOXA9	-4.26	5	-1.77	0.0383	672	0.974	0.962	16555	1
PDE7B	-4.66	6	-1.77	0.0383	673	0.974	0.962	16554	1
SLC35G1	-4.66	6	-1.77	0.0383	674	0.974	0.962	16553	1
ANAPC15	-4.66	6	-1.77	0.0383	675	0.974	0.962	16552	1
ZNF23	-3.29	3	-1.77	0.0384	676	0.974	0.962	16551	1
TMEM200A	-3.8	4	-1.77	0.0384	677	0.974	0.962	16550	1
FAM189B	-4.65	6	-1.77	0.0385	678	0.974	0.961	16549	1
IFT140	-4.65	6	-1.77	0.0385	679	0.974	0.961	16548	1
CYP4A22	-1.9	1	-1.77	0.0385	680	0.974	0.961	16547	1
NAA11	-3.29	3	-1.77	0.0386	681	0.974	0.961	16546	1
DGUOK	-4.65	6	-1.77	0.0386	682	0.974	0.961	16545	1
TMEM41A	-4.65	6	-1.77	0.0387	683	0.974	0.961	16544	1
GTPBP1	-4.65	6	-1.77	0.0387	684	0.974	0.961	16543	1
ATP6V1C2	-4.65	6	-1.77	0.0387	685	0.974	0.961	16542	1
FAM19A5	-4.65	6	-1.76	0.0388	686	0.975	0.961	16541	1
CKM	-4.64	6	-1.76	0.0389	687	0.975	0.961	16540	1
KLRG2	-4.63	6	-1.76	0.0392	688	0.977	0.961	16539	1
LTBP4	-4.63	6	-1.76	0.0392	689	0.977	0.961	16538	1
CLDN23	-4.23	5	-1.76	0.0392	690	0.977	0.961	16537	1
SLC31A1	-1.89	1	-1.76	0.0393	691	0.977	0.961	16536	1
UPK3B	-4.63	6	-1.76	0.0394	692	0.977	0.961	16535	1
ZNF641	-4.63	6	-1.76	0.0394	693	0.977	0.961	16534	1
ILDR1	-4.63	6	-1.76	0.0394	694	0.977	0.961	16533	1
DISP1	-4.63	6	-1.76	0.0394	695	0.977	0.961	16532	1
IKZF2	-4.62	6	-1.76	0.0396	696	0.978	0.96	16531	1
ZNF329	-3.77	4	-1.75	0.0396	697	0.978	0.96	16530	1
CYP4A11	-1.89	1	-1.75	0.0397	698	0.978	0.96	16529	1
SYT14	-4.62	6	-1.75	0.0397	699	0.978	0.96	16528	1
OR1J1	-2.66	2	-1.75	0.0399	700	0.982	0.96	16527	1
EPB42	-4.6	6	-1.75	0.0402	701	0.982	0.96	16526	1
BMP2K	-4.6	6	-1.75	0.0403	702	0.982	0.96	16525	1
DDIT3	-3.76	4	-1.75	0.0403	703	0.982	0.96	16524	1
ABHD2	-4.59	6	-1.74	0.0405	704	0.982	0.959	16523	1
FAM187A	-3.75	4	-1.74	0.0406	705	0.982	0.959	16522	1
MFSD10	-4.59	6	-1.74	0.0407	706	0.982	0.959	16521	1
MGAT3	-4.19	5	-1.74	0.0407	707	0.982	0.959	16520	1
TPH2	-4.59	6	-1.74	0.0408	708	0.982	0.959	16519	1
LHFPL5	-4.58	6	-1.74	0.0409	709	0.982	0.959	16518	1
GRB10	-4.58	6	-1.74	0.0409	710	0.982	0.959	16517	1
FAM129A	-4.58	6	-1.74	0.041	711	0.982	0.959	16516	1
CCDC141	-4.58	6	-1.74	0.041	712	0.982	0.959	16515	1
SLC16A5	-4.58	6	-1.74	0.041	713	0.982	0.959	16514	1
CDH15	-4.58	6	-1.74	0.0411	714	0.982	0.959	16513	1
TOPORS	-4.58	6	-1.74	0.0411	715	0.982	0.959	16512	1
AQP3	-4.58	6	-1.74	0.0411	716	0.982	0.959	16511	1
CDO1	-4.58	6	-1.74	0.0411	717	0.982	0.959	16510	1
LZTS1	-4.58	6	-1.74	0.0412	718	0.982	0.959	16509	1
MANEAL	-4.58	6	-1.74	0.0412	719	0.982	0.959	16508	1
MMP19	-4.57	6	-1.74	0.0412	720	0.982	0.959	16507	1
GNB1L	-4.57	6	-1.73	0.0415	721	0.982	0.959	16506	1
MAK16	-4.57	6	-1.73	0.0415	722	0.982	0.959	16505	1
MCHR2	-4.56	6	-1.73	0.0416	723	0.982	0.958	16504	1
KRT74	-4.56	6	-1.73	0.0416	724	0.982	0.958	16503	1
PKN3	-4.56	6	-1.73	0.0416	725	0.982	0.958	16502	1
STEAP2	-4.56	6	-1.73	0.0416	726	0.982	0.958	16501	1
B3GNT4	-4.16	5	-1.73	0.0417	727	0.982	0.958	16500	1
OR10AG1	-2.63	2	-1.73	0.0417	728	0.982	0.958	16499	1
DTNB	-4.56	6	-1.73	0.0418	729	0.982	0.958	16498	1
AHSG	-4.56	6	-1.73	0.0419	730	0.982	0.958	16497	1
LSR	-4.55	6	-1.73	0.0419	731	0.982	0.958	16496	1
FBXO9	-4.55	6	-1.73	0.0419	732	0.982	0.958	16495	1
CCDC94	-4.55	6	-1.73	0.042	733	0.982	0.958	16494	1
GRIN3B	-4.55	6	-1.73	0.042	734	0.982	0.958	16493	1
CLEC4G	-4.55	6	-1.73	0.0421	735	0.982	0.958	16492	1
LOXL1	-4.55	6	-1.73	0.0421	736	0.982	0.958	16491	1
STIL	-4.55	6	-1.73	0.0421	737	0.982	0.958	16490	1
PPP2R4	-4.54	6	-1.72	0.0423	738	0.982	0.958	16489	1
PORCN	-4.54	6	-1.72	0.0423	739	0.982	0.958	16488	1
DAGLB	-4.54	6	-1.72	0.0424	740	0.982	0.958	16487	1
KIAA1211L	-4.54	6	-1.72	0.0424	741	0.982	0.958	16486	1
PRRG3	-4.54	6	-1.72	0.0424	742	0.982	0.958	16485	1
PRR12	-4.54	6	-1.72	0.0424	743	0.982	0.958	16484	1
CBFB	-4.54	6	-1.72	0.0424	744	0.982	0.958	16483	1
APOBEC3A	-3.21	3	-1.72	0.0425	745	0.982	0.958	16482	1
BCKDK	-4.54	6	-1.72	0.0426	746	0.983	0.957	16481	1
ADAD2	-4.53	6	-1.72	0.0426	747	0.983	0.957	16480	1
FOXRED2	-4.53	6	-1.72	0.0427	748	0.983	0.957	16479	1
CHD1	-4.53	6	-1.72	0.0428	749	0.983	0.957	16478	1
SYCP2L	-4.53	6	-1.72	0.0428	750	0.983	0.957	16477	1
HMOX1	-4.53	6	-1.72	0.0429	751	0.983	0.957	16476	1
CNOT1	-4.52	6	-1.72	0.043	752	0.983	0.957	16475	1
C14orf178	-1.85	1	-1.72	0.043	753	0.983	0.957	16474	1
TRMT61B	-4.52	6	-1.72	0.043	754	0.983	0.957	16473	1
CKAP2L	-4.52	6	-1.72	0.0431	755	0.984	0.957	16472	1
NDUFB2	-4.12	5	-1.71	0.0433	756	0.987	0.957	16471	1
GPATCH2	-4.51	6	-1.71	0.0434	757	0.988	0.957	16470	1
NLRP14	-4.11	5	-1.71	0.044	758	0.991	0.956	16469	1
ACBD5	-4.5	6	-1.71	0.044	759	0.991	0.956	16468	1
USP16	-4.5	6	-1.71	0.044	760	0.991	0.956	16467	1
SAP30BP	-4.49	6	-1.7	0.0441	761	0.991	0.956	16466	1
NIPAL2	-3.18	3	-1.7	0.0442	762	0.991	0.956	16465	1
FOSB	-4.49	6	-1.7	0.0442	763	0.991	0.956	16464	1
LHX3	-4.49	6	-1.7	0.0443	764	0.991	0.956	16463	1
ANKRD12	-4.49	6	-1.7	0.0443	765	0.991	0.956	16462	1
TSPAN32	-4.49	6	-1.7	0.0444	766	0.991	0.956	16461	1
PTP4A3	-4.49	6	-1.7	0.0444	767	0.991	0.956	16460	1
FOXH1	-4.48	6	-1.7	0.0446	768	0.991	0.955	16459	1
HLF	-4.48	6	-1.7	0.0446	769	0.991	0.955	16458	1
ZNF614	-1.83	1	-1.7	0.0447	770	0.991	0.955	16457	1
UBR5	-4.48	6	-1.7	0.0447	771	0.991	0.955	16456	1
AIFM3	-4.46	6	-1.69	0.0452	772	0.991	0.955	16455	1
MSRB1	-3.64	4	-1.69	0.0454	773	0.991	0.955	16454	0.999
NDUFV1	-4.46	6	-1.69	0.0455	774	0.991	0.955	16453	0.999
CDC42EP3	-3.15	3	-1.69	0.0455	775	0.991	0.955	16452	0.999
OR1M1	-3.64	4	-1.69	0.0455	776	0.991	0.955	16451	0.999
RHOBTB1	-4.45	6	-1.69	0.0456	777	0.991	0.954	16450	0.999
NCOA2	-4.45	6	-1.69	0.0456	778	0.991	0.954	16449	0.999
UBE2T	-3.64	4	-1.69	0.0457	779	0.991	0.954	16448	0.999
HTATSF1	-4.45	6	-1.69	0.0457	780	0.991	0.954	16447	0.999
GGT7	-4.45	6	-1.69	0.0458	781	0.991	0.954	16446	0.999
DNASE1L3	-4.06	5	-1.69	0.0458	782	0.991	0.954	16445	0.999
FAM92B	-4.45	6	-1.69	0.0458	783	0.991	0.954	16444	0.999
ARSG	-4.45	6	-1.69	0.0458	784	0.991	0.954	16443	0.999
ARHGEF4	-4.45	6	-1.69	0.0459	785	0.991	0.954	16442	0.999
SAP30	-3.63	4	-1.68	0.046	786	0.991	0.954	16441	0.999
ABCB6	-4.44	6	-1.68	0.0461	787	0.991	0.954	16440	0.999
RORC	-4.44	6	-1.68	0.0461	788	0.991	0.954	16439	0.999
C18orf25	-2.56	2	-1.68	0.0463	789	0.991	0.954	16438	0.999
RNF145	-4.04	5	-1.68	0.0466	790	0.991	0.953	16437	0.999
NES	-4.43	6	-1.68	0.0466	791	0.991	0.953	16436	0.999
PPM1H	-4.43	6	-1.68	0.0467	792	0.991	0.953	16435	0.999
CCDC8	-3.61	4	-1.68	0.0468	793	0.991	0.953	16434	0.999
HTR7	-4.42	6	-1.67	0.0471	794	0.991	0.953	16433	0.999
DIS3L2	-4.41	6	-1.67	0.0471	795	0.991	0.953	16432	0.999
FAM171A2	-4.41	6	-1.67	0.0474	796	0.991	0.953	16431	0.999
GTF2H1	-1.8	1	-1.67	0.0475	797	0.991	0.953	16430	0.999
MIIP	-4.4	6	-1.67	0.0475	798	0.991	0.952	16429	0.999
SDF2	-4.02	5	-1.67	0.0476	799	0.991	0.952	16428	0.999
UNK	-4.4	6	-1.67	0.0476	800	0.991	0.952	16427	0.999
KLF5	-4.4	6	-1.67	0.0477	801	0.991	0.952	16426	0.999
UBA5	-4.01	5	-1.67	0.0479	802	0.991	0.952	16425	0.999
C14orf28	-1.79	1	-1.67	0.0479	803	0.991	0.952	16424	0.999
CUL9	-4.39	6	-1.67	0.0479	804	0.991	0.952	16423	0.999
MYOC	-4.39	6	-1.67	0.0479	805	0.991	0.952	16422	0.999
CXCR1	-3.59	4	-1.66	0.048	806	0.991	0.952	16421	0.999
UTF1	-4.39	6	-1.66	0.0481	807	0.991	0.952	16420	0.999
MEF2BNB	-2.53	2	-1.66	0.0481	808	0.991	0.952	16419	0.999
GLRX2	-2.53	2	-1.66	0.0482	809	0.991	0.952	16418	0.999
GFAP	-4.39	6	-1.66	0.0482	810	0.991	0.952	16417	0.999
C22orf29	-4.39	6	-1.66	0.0482	811	0.991	0.952	16416	0.999
OR51F1	-3.1	3	-1.66	0.0483	812	0.991	0.952	16415	0.999
C2orf42	-4.38	6	-1.66	0.0484	813	0.991	0.952	16414	0.999
TP63	-4.38	6	-1.66	0.0484	814	0.991	0.952	16413	0.999
LPHN1	-4.38	6	-1.66	0.0484	815	0.991	0.952	16412	0.999
POU4F2	-4.38	6	-1.66	0.0485	816	0.991	0.951	16411	0.999
MXRA5	-4.38	6	-1.66	0.0485	817	0.991	0.951	16410	0.999
COL8A2	-4	5	-1.66	0.0486	818	0.991	0.951	16409	0.999
NBR1	-4.37	6	-1.66	0.0487	819	0.991	0.951	16408	0.999
TSSK4	-4.37	6	-1.66	0.0487	820	0.991	0.951	16407	0.999
TFEB	-4.37	6	-1.66	0.0487	821	0.991	0.951	16406	0.999
CAMKK1	-4.37	6	-1.66	0.0488	822	0.991	0.951	16405	0.999
IL25	-4.37	6	-1.66	0.0488	823	0.991	0.951	16404	0.999
RINT1	-4.37	6	-1.66	0.0488	824	0.991	0.951	16403	0.999
REN	-4.37	6	-1.65	0.049	825	0.991	0.951	16402	0.999
METTL2A	-1.78	1	-1.65	0.0491	826	0.991	0.951	16401	0.999
C11orf91	-3.56	4	-1.65	0.0492	827	0.991	0.951	16400	0.999
CHRNA9	-4.36	6	-1.65	0.0493	828	0.991	0.951	16399	0.999
CCDC85B	-3.98	5	-1.65	0.0493	829	0.991	0.951	16398	0.999
SIRPB1	-3.98	5	-1.65	0.0493	830	0.991	0.951	16397	0.999
RILP	-4.36	6	-1.65	0.0494	831	0.991	0.951	16396	0.999
PDE2A	-4.36	6	-1.65	0.0494	832	0.991	0.951	16395	0.999
NXF5	-2.51	2	-1.65	0.0494	833	0.991	0.951	16394	0.999
INTU	-4.35	6	-1.65	0.0495	834	0.991	0.951	16393	0.999
GPR65	-2.51	2	-1.65	0.0496	835	0.991	0.95	16392	0.999
AQP5	-4.35	6	-1.65	0.0496	836	0.991	0.95	16391	0.999
ARHGEF11	-4.35	6	-1.65	0.0496	837	0.991	0.95	16390	0.999
HOOK1	-4.35	6	-1.65	0.0497	838	0.991	0.95	16389	0.999
GABRA1	-4.35	6	-1.65	0.0498	839	0.991	0.95	16388	0.999
ANKRD9	-3.97	5	-1.65	0.0498	840	0.991	0.95	16387	0.999
OR2AT4	-3.55	4	-1.65	0.0499	841	0.991	0.95	16386	0.999
IFT46	-4.34	6	-1.65	0.0499	842	0.991	0.95	16385	0.999
LTA	-3.96	5	-1.65	0.0499	843	0.991	0.95	16384	0.999
RSRC1	-3.96	5	-1.65	0.05	844	0.991	0.95	16383	0.999
MSH4	-3.96	5	-1.64	0.05	845	0.991	0.95	16382	0.999
IHH	-4.34	6	-1.64	0.05	846	0.991	0.95	16381	0.999
LAMB1	-4.34	6	-1.64	0.05	847	0.991	0.95	16380	0.999
RNF32	-4.34	6	-1.64	0.0501	848	0.991	0.95	16379	0.999
DHRS7B	-4.34	6	-1.64	0.0501	849	0.991	0.95	16378	0.999
ZNRF1	-4.34	6	-1.64	0.0502	850	0.991	0.95	16377	0.999
KLHL17	-4.34	6	-1.64	0.0502	851	0.991	0.95	16376	0.999
SEL1L	-4.34	6	-1.64	0.0503	852	0.991	0.95	16375	0.999
C4orf46	-1.77	1	-1.64	0.0503	853	0.991	0.95	16374	0.999
PLTP	-4.33	6	-1.64	0.0503	854	0.991	0.95	16373	0.999
KIAA1467	-4.33	6	-1.64	0.0504	855	0.991	0.95	16372	0.999
C10orf53	-3.54	4	-1.64	0.0504	856	0.991	0.95	16371	0.999
CCDC146	-4.33	6	-1.64	0.0504	857	0.991	0.95	16370	0.999
SLCO1B3	-2.5	2	-1.64	0.0506	858	0.991	0.949	16369	0.999
COPS7B	-4.32	6	-1.64	0.0507	859	0.991	0.949	16368	0.999
PTPN6	-4.32	6	-1.64	0.0507	860	0.991	0.949	16367	0.999
C9orf172	-4.32	6	-1.64	0.0509	861	0.991	0.949	16366	0.999
KIAA1324	-4.32	6	-1.64	0.0509	862	0.991	0.949	16365	0.999
GALK1	-4.32	6	-1.64	0.0509	863	0.991	0.949	16364	0.999
TMPRSS6	-4.32	6	-1.63	0.0511	864	0.991	0.949	16363	0.999
HIVEP3	-4.32	6	-1.63	0.0511	865	0.991	0.949	16362	0.999
PDGFC	-4.32	6	-1.63	0.0511	866	0.991	0.949	16361	0.999
SIRT4	-4.31	6	-1.63	0.0511	867	0.991	0.949	16360	0.999
NPHP3	-4.31	6	-1.63	0.0512	868	0.991	0.949	16359	0.999
LRP10	-4.31	6	-1.63	0.0512	869	0.991	0.949	16358	0.999
VPS45	-4.31	6	-1.63	0.0513	870	0.991	0.949	16357	0.999
C2orf81	-4.31	6	-1.63	0.0513	871	0.991	0.949	16356	0.999
ZNF721	-1.76	1	-1.63	0.0513	872	0.991	0.949	16355	0.999
PMM1	-4.31	6	-1.63	0.0515	873	0.991	0.949	16354	0.999
TRAF2	-4.31	6	-1.63	0.0515	874	0.991	0.949	16353	0.999
SUN3	-4.3	6	-1.63	0.0515	875	0.991	0.948	16352	0.999
NCR3LG1	-4.3	6	-1.63	0.0517	876	0.991	0.948	16351	0.999
HUWE1	-4.3	6	-1.63	0.0518	877	0.991	0.948	16350	0.999
SYTL1	-4.3	6	-1.63	0.0518	878	0.991	0.948	16349	0.999
TBC1D10B	-3.92	5	-1.63	0.0519	879	0.991	0.948	16348	0.999
GRB7	-4.29	6	-1.63	0.052	880	0.991	0.948	16347	0.999
SCN8A	-4.29	6	-1.63	0.052	881	0.991	0.948	16346	0.999
LGI3	-4.29	6	-1.63	0.052	882	0.991	0.948	16345	0.999
ZNF556	-3.92	5	-1.62	0.0521	883	0.991	0.948	16344	0.999
FOXD2	-4.29	6	-1.62	0.0522	884	0.991	0.948	16343	0.999
CHD7	-4.29	6	-1.62	0.0522	885	0.991	0.948	16342	0.999
ZNF678	-2.48	2	-1.62	0.0522	886	0.991	0.948	16341	0.999
PLEKHA5	-4.29	6	-1.62	0.0523	887	0.991	0.948	16340	0.999
PLEKHH1	-4.28	6	-1.62	0.0524	888	0.991	0.948	16339	0.999
RASL10A	-4.28	6	-1.62	0.0524	889	0.991	0.948	16338	0.999
RASEF	-4.28	6	-1.62	0.0524	890	0.991	0.948	16337	0.999
CEACAM21	-3.91	5	-1.62	0.0525	891	0.991	0.948	16336	0.999
CMBL	-4.28	6	-1.62	0.0526	892	0.991	0.947	16335	0.999
NTF4	-4.28	6	-1.62	0.0526	893	0.991	0.947	16334	0.999
FAM174A	-3.49	4	-1.62	0.0527	894	0.991	0.947	16333	0.999
FDX1	-1.75	1	-1.62	0.0527	895	0.991	0.947	16332	0.999
KRT5	-4.28	6	-1.62	0.0528	896	0.991	0.947	16331	0.999
SLC24A1	-4.27	6	-1.62	0.0529	897	0.991	0.947	16330	0.999
DYNC2H1	-4.27	6	-1.62	0.053	898	0.991	0.947	16329	0.999
ZNF607	-3.02	3	-1.62	0.053	899	0.991	0.947	16328	0.999
ADAMTS17	-4.27	6	-1.62	0.0531	900	0.991	0.947	16327	0.999
NLRP6	-4.27	6	-1.61	0.0532	901	0.991	0.947	16326	0.999
EHHADH	-4.27	6	-1.61	0.0532	902	0.991	0.947	16325	0.999
RAD9A	-4.26	6	-1.61	0.0533	903	0.991	0.947	16324	0.999
SLCO5A1	-4.26	6	-1.61	0.0533	904	0.991	0.947	16323	0.999
CACNA2D4	-4.26	6	-1.61	0.0534	905	0.991	0.947	16322	0.999
DHRS7C	-4.26	6	-1.61	0.0534	906	0.991	0.947	16321	0.999
PLP1	-4.26	6	-1.61	0.0535	907	0.991	0.947	16320	0.999
MYO3B	-4.26	6	-1.61	0.0535	908	0.991	0.946	16319	0.999
C17orf75	-4.26	6	-1.61	0.0536	909	0.991	0.946	16318	0.999
ARHGEF10	-4.25	6	-1.61	0.0538	910	0.991	0.946	16317	0.999
STX6	-4.24	6	-1.61	0.0541	911	0.991	0.946	16316	0.999
CHGB	-4.24	6	-1.61	0.0541	912	0.991	0.946	16315	0.999
MARCH11	-3.87	5	-1.61	0.0541	913	0.991	0.946	16314	0.999
CHAT	-4.24	6	-1.6	0.0543	914	0.991	0.946	16313	0.999
COX7A2L	-2.45	2	-1.6	0.0545	915	0.991	0.946	16312	0.999
IGHMBP2	-4.24	6	-1.6	0.0545	916	0.991	0.946	16311	0.999
LEO1	-4.24	6	-1.6	0.0545	917	0.991	0.946	16310	0.999
SOX11	-4.24	6	-1.6	0.0545	918	0.991	0.945	16309	0.999
AP4M1	-4.23	6	-1.6	0.0546	919	0.991	0.945	16308	0.999
TRIM38	-3.45	4	-1.6	0.0548	920	0.991	0.945	16307	0.999
EBLN1	-3.45	4	-1.6	0.0548	921	0.991	0.945	16306	0.999
SUPT20H	-4.22	6	-1.6	0.0551	922	0.991	0.945	16305	0.998
CDK5R2	-4.22	6	-1.6	0.0552	923	0.991	0.945	16304	0.998
MYC	-3.85	5	-1.59	0.0554	924	0.991	0.945	16303	0.998
PSMD5	-4.21	6	-1.59	0.0554	925	0.991	0.945	16302	0.998
LY75	-4.21	6	-1.59	0.0554	926	0.991	0.945	16301	0.998
ZNF224	-2.98	3	-1.59	0.0555	927	0.991	0.945	16300	0.998
ELL2	-4.21	6	-1.59	0.0555	928	0.991	0.944	16299	0.998
PYDC2	-1.72	1	-1.59	0.0556	929	0.991	0.944	16298	0.998
NKX3-1	-4.21	6	-1.59	0.0556	930	0.991	0.944	16297	0.998
CYP27C1	-4.21	6	-1.59	0.0558	931	0.991	0.944	16296	0.998
RPL35	-1.72	1	-1.59	0.0558	932	0.991	0.944	16295	0.998
NCKAP5L	-4.21	6	-1.59	0.0558	933	0.991	0.944	16294	0.998
MFAP5	-2.97	3	-1.59	0.0559	934	0.991	0.944	16293	0.998
PECR	-4.2	6	-1.59	0.056	935	0.991	0.944	16292	0.998
NAT16	-4.2	6	-1.59	0.0561	936	0.991	0.944	16291	0.998
MPPE1	-4.2	6	-1.59	0.0562	937	0.991	0.944	16290	0.998
INPP4A	-4.2	6	-1.59	0.0562	938	0.991	0.944	16289	0.998
RNF224	-3.83	5	-1.59	0.0563	939	0.991	0.944	16288	0.998
GMPR2	-3.83	5	-1.59	0.0564	940	0.991	0.944	16287	0.998
ASIP	-3.42	4	-1.59	0.0565	941	0.991	0.944	16286	0.998
WDR67	-3.82	5	-1.58	0.0565	942	0.991	0.943	16285	0.998
LAMA5	-4.19	6	-1.58	0.0566	943	0.991	0.943	16284	0.998
FANCD2	-4.19	6	-1.58	0.0566	944	0.991	0.943	16283	0.998
DHRS4	-2.42	2	-1.58	0.0567	945	0.991	0.943	16282	0.998
ETV7	-4.19	6	-1.58	0.0567	946	0.991	0.943	16281	0.998
RALB	-4.19	6	-1.58	0.0567	947	0.991	0.943	16280	0.998
C1orf53	-4.18	6	-1.58	0.0568	948	0.991	0.943	16279	0.998
TOMM7	-1.71	1	-1.58	0.0568	949	0.991	0.943	16278	0.998
UGT2A1	-2.96	3	-1.58	0.0568	950	0.991	0.943	16277	0.998
HECTD1	-4.18	6	-1.58	0.057	951	0.991	0.943	16276	0.998
RGR	-4.18	6	-1.58	0.0571	952	0.991	0.943	16275	0.998
HSPB8	-3.81	5	-1.58	0.0573	953	0.991	0.943	16274	0.998
TPRG1L	-4.17	6	-1.58	0.0574	954	0.991	0.943	16273	0.998
EMC10	-4.17	6	-1.58	0.0574	955	0.991	0.943	16272	0.998
SOGA1	-4.17	6	-1.58	0.0574	956	0.991	0.943	16271	0.998
MUM1	-4.17	6	-1.58	0.0575	957	0.991	0.942	16270	0.998
SLC44A4	-4.17	6	-1.58	0.0576	958	0.991	0.942	16269	0.998
HSD17B12	-3.4	4	-1.58	0.0576	959	0.991	0.942	16268	0.998
BHLHE22	-3.8	5	-1.58	0.0576	960	0.991	0.942	16267	0.998
SUGP2	-4.16	6	-1.57	0.0578	961	0.991	0.942	16266	0.998
PTH1R	-4.16	6	-1.57	0.0579	962	0.991	0.942	16265	0.998
RNF207	-4.16	6	-1.57	0.0579	963	0.991	0.942	16264	0.998
CD7	-4.16	6	-1.57	0.058	964	0.991	0.942	16263	0.998
DUSP22	-3.39	4	-1.57	0.0581	965	0.991	0.942	16262	0.998
LRRC71	-4.15	6	-1.57	0.0582	966	0.991	0.942	16261	0.998
TAL1	-4.15	6	-1.57	0.0582	967	0.991	0.942	16260	0.998
FAM63A	-4.15	6	-1.57	0.0583	968	0.991	0.942	16259	0.998
FKBP11	-4.15	6	-1.57	0.0584	969	0.991	0.942	16258	0.998
IPO4	-4.15	6	-1.57	0.0585	970	0.991	0.941	16257	0.998
ODC1	-4.14	6	-1.57	0.0586	971	0.991	0.941	16256	0.998
PODNL1	-4.14	6	-1.57	0.0587	972	0.991	0.941	16255	0.998
CISD3	-3.78	5	-1.57	0.0587	973	0.991	0.941	16254	0.998
C6orf106	-2.39	2	-1.57	0.0588	974	0.991	0.941	16253	0.998
SSBP4	-4.14	6	-1.57	0.0588	975	0.991	0.941	16252	0.998
MINPP1	-4.14	6	-1.56	0.0588	976	0.991	0.941	16251	0.998
NOD1	-4.14	6	-1.56	0.0588	977	0.991	0.941	16250	0.998
ZNF195	-2.93	3	-1.56	0.0588	978	0.991	0.941	16249	0.998
ATP2A1	-4.14	6	-1.56	0.0589	979	0.991	0.941	16248	0.998
HES5	-2.93	3	-1.56	0.0589	980	0.991	0.941	16247	0.998
OR5B21	-2.92	3	-1.56	0.059	981	0.991	0.941	16246	0.998
TBC1D22A	-4.14	6	-1.56	0.059	982	0.991	0.941	16245	0.998
NYAP1	-4.14	6	-1.56	0.059	983	0.991	0.941	16244	0.998
CCDC136	-4.14	6	-1.56	0.059	984	0.991	0.941	16243	0.998
ACAD8	-4.13	6	-1.56	0.0591	985	0.991	0.941	16242	0.998
SMC3	-4.13	6	-1.56	0.0591	986	0.991	0.941	16241	0.998
DNAJC17	-4.13	6	-1.56	0.0591	987	0.991	0.941	16240	0.998
OVOL2	-4.13	6	-1.56	0.0592	988	0.991	0.941	16239	0.998
OR1B1	-3.77	5	-1.56	0.0592	989	0.991	0.941	16238	0.998
SLC39A8	-2.92	3	-1.56	0.0592	990	0.991	0.941	16237	0.998
NOP14	-4.13	6	-1.56	0.0593	991	0.991	0.941	16236	0.998
CMTM7	-4.13	6	-1.56	0.0593	992	0.991	0.941	16235	0.998
PRKAR2B	-4.13	6	-1.56	0.0593	993	0.991	0.941	16234	0.998
CNGB1	-4.13	6	-1.56	0.0594	994	0.991	0.941	16233	0.998
PIH1D2	-3.77	5	-1.56	0.0594	995	0.991	0.941	16232	0.998
MAPK3	-4.12	6	-1.56	0.0595	996	0.991	0.941	16231	0.998
PRL	-4.12	6	-1.56	0.0595	997	0.991	0.94	16230	0.998
GTPBP3	-4.12	6	-1.56	0.0596	998	0.991	0.94	16229	0.998
HMGCS2	-4.12	6	-1.56	0.0596	999	0.991	0.94	16228	0.998
SMURF1	-4.12	6	-1.56	0.0596	1000	0.991	0.94	16227	0.998
PPM1M	-4.12	6	-1.56	0.0596	1001	0.991	0.94	16226	0.998
ETV2	-4.12	6	-1.56	0.0597	1002	0.991	0.94	16225	0.998
DHFR	-2.91	3	-1.56	0.0598	1003	0.991	0.94	16224	0.998
SENP8	-3.36	4	-1.55	0.0601	1004	0.991	0.94	16223	0.998
CLUH	-4.11	6	-1.55	0.0602	1005	0.991	0.94	16222	0.998
WDR35	-4.11	6	-1.55	0.0602	1006	0.991	0.94	16221	0.998
SGPP1	-4.11	6	-1.55	0.0602	1007	0.991	0.94	16220	0.998
ARHGAP11A	-2.91	3	-1.55	0.0602	1008	0.991	0.94	16219	0.998
MAP2K6	-4.11	6	-1.55	0.0603	1009	0.991	0.94	16218	0.998
GIF	-4.11	6	-1.55	0.0604	1010	0.991	0.94	16217	0.998
KCNK15	-3.75	5	-1.55	0.0604	1011	0.991	0.94	16216	0.998
SLC35B2	-4.1	6	-1.55	0.0605	1012	0.991	0.94	16215	0.998
TMEM196	-4.1	6	-1.55	0.0606	1013	0.991	0.939	16214	0.998
STAMBPL1	-4.1	6	-1.55	0.0606	1014	0.991	0.939	16213	0.998
TMEM190	-4.1	6	-1.55	0.0606	1015	0.991	0.939	16212	0.998
DGCR2	-4.1	6	-1.55	0.0607	1016	0.991	0.939	16211	0.998
RNF170	-4.1	6	-1.55	0.0607	1017	0.991	0.939	16210	0.998
GDPD5	-4.1	6	-1.55	0.0608	1018	0.991	0.939	16209	0.998
YDJC	-4.1	6	-1.55	0.0609	1019	0.991	0.939	16208	0.998
KCNC4	-4.09	6	-1.55	0.0609	1020	0.991	0.939	16207	0.998
TXNRD1	-4.09	6	-1.55	0.061	1021	0.991	0.939	16206	0.998
TANGO2	-4.09	6	-1.55	0.061	1022	0.991	0.939	16205	0.998
C1orf122	-3.74	5	-1.55	0.061	1023	0.991	0.939	16204	0.998
GPR84	-4.09	6	-1.55	0.0611	1024	0.991	0.939	16203	0.998
ITGA2B	-4.09	6	-1.54	0.0613	1025	0.991	0.939	16202	0.998
SMTNL1	-4.08	6	-1.54	0.0615	1026	0.991	0.939	16201	0.998
TEP1	-4.08	6	-1.54	0.0616	1027	0.991	0.938	16200	0.998
UMPS	-4.08	6	-1.54	0.0616	1028	0.991	0.938	16199	0.998
MTHFD2L	-4.08	6	-1.54	0.0617	1029	0.991	0.938	16198	0.998
C19orf54	-4.08	6	-1.54	0.0617	1030	0.991	0.938	16197	0.998
SKIV2L2	-3.33	4	-1.54	0.0618	1031	0.991	0.938	16196	0.998
TRO	-4.07	6	-1.54	0.0619	1032	0.991	0.938	16195	0.998
NRAS	-2.35	2	-1.54	0.0619	1033	0.991	0.938	16194	0.998
CABLES1	-4.07	6	-1.54	0.0619	1034	0.991	0.938	16193	0.998
GALNTL6	-4.07	6	-1.54	0.0621	1035	0.991	0.938	16192	0.998
NLRP2	-4.07	6	-1.54	0.0621	1036	0.991	0.938	16191	0.998
PDK3	-4.07	6	-1.54	0.0623	1037	0.991	0.938	16190	0.998
HAND2	-3.71	5	-1.54	0.0623	1038	0.991	0.938	16189	0.998
TGM5	-4.07	6	-1.54	0.0623	1039	0.991	0.938	16188	0.998
PPP3R2	-3.71	5	-1.53	0.0624	1040	0.991	0.938	16187	0.998
GTSE1	-4.06	6	-1.53	0.0625	1041	0.991	0.938	16186	0.998
MOS	-3.71	5	-1.53	0.0625	1042	0.991	0.938	16185	0.998
PHACTR2	-4.06	6	-1.53	0.0625	1043	0.991	0.938	16184	0.998
MRPL15	-4.06	6	-1.53	0.0625	1044	0.991	0.937	16183	0.998
KBTBD11	-4.06	6	-1.53	0.0625	1045	0.991	0.937	16182	0.998
LRGUK	-4.06	6	-1.53	0.0626	1046	0.991	0.937	16181	0.998
FAM104B	-1.66	1	-1.53	0.0626	1047	0.991	0.937	16180	0.998
RBCK1	-4.06	6	-1.53	0.0627	1048	0.991	0.937	16179	0.998
MACROD1	-4.06	6	-1.53	0.0627	1049	0.991	0.937	16178	0.998
ME3	-4.06	6	-1.53	0.0627	1050	0.991	0.937	16177	0.998
CYP2D6	-2.34	2	-1.53	0.0628	1051	0.991	0.937	16176	0.998
OR51B5	-3.31	4	-1.53	0.0628	1052	0.991	0.937	16175	0.998
KCNC3	-4.05	6	-1.53	0.0629	1053	0.991	0.937	16174	0.998
PRSS22	-4.05	6	-1.53	0.063	1054	0.991	0.937	16173	0.998
KIAA1009	-4.05	6	-1.53	0.0631	1055	0.991	0.937	16172	0.998
CDKL3	-3.31	4	-1.53	0.0632	1056	0.991	0.937	16171	0.998
SMOC1	-4.05	6	-1.53	0.0632	1057	0.991	0.937	16170	0.998
TIAF1	-3.3	4	-1.53	0.0632	1058	0.991	0.937	16169	0.998
FFAR1	-3.69	5	-1.53	0.0632	1059	0.991	0.937	16168	0.998
SLC6A16	-4.05	6	-1.53	0.0633	1060	0.991	0.937	16167	0.998
NDUFAF1	-1.65	1	-1.53	0.0633	1061	0.991	0.937	16166	0.998
ECSIT	-4.04	6	-1.53	0.0633	1062	0.991	0.937	16165	0.998
TMEM170A	-3.69	5	-1.53	0.0633	1063	0.991	0.937	16164	0.998
PAIP1	-3.69	5	-1.53	0.0634	1064	0.991	0.937	16163	0.998
NT5C3B	-4.04	6	-1.53	0.0634	1065	0.991	0.937	16162	0.998
LAIR1	-2.86	3	-1.53	0.0635	1066	0.991	0.937	16161	0.998
SEPHS1	-3.3	4	-1.53	0.0636	1067	0.991	0.936	16160	0.998
SLC4A1	-4.04	6	-1.53	0.0636	1068	0.991	0.936	16159	0.998
GJC2	-3.69	5	-1.53	0.0636	1069	0.991	0.936	16158	0.998
SLC17A8	-4.04	6	-1.53	0.0636	1070	0.991	0.936	16157	0.998
ASF1B	-4.04	6	-1.53	0.0636	1071	0.991	0.936	16156	0.998
FAM189A2	-4.04	6	-1.52	0.0637	1072	0.991	0.936	16155	0.998
HNRNPA0	-3.68	5	-1.52	0.0638	1073	0.991	0.936	16154	0.998
LHX8	-4.03	6	-1.52	0.0638	1074	0.991	0.936	16153	0.998
FETUB	-4.03	6	-1.52	0.0638	1075	0.991	0.936	16152	0.998
NUDT21	-4.03	6	-1.52	0.0639	1076	0.991	0.936	16151	0.998
DDX3X	-4.03	6	-1.52	0.064	1077	0.991	0.936	16150	0.998
NOP10	-2.85	3	-1.52	0.064	1078	0.991	0.936	16149	0.998
ARVCF	-4.03	6	-1.52	0.0642	1079	0.991	0.936	16148	0.998
NXF1	-4.02	6	-1.52	0.0643	1080	0.991	0.936	16147	0.998
MDK	-3.67	5	-1.52	0.0644	1081	0.991	0.936	16146	0.998
FAM219A	-4.02	6	-1.52	0.0644	1082	0.991	0.936	16145	0.998
ARFIP1	-1.64	1	-1.52	0.0645	1083	0.991	0.936	16144	0.998
ACPP	-4.02	6	-1.52	0.0647	1084	0.991	0.935	16143	0.998
N4BP1	-4.02	6	-1.52	0.0647	1085	0.991	0.935	16142	0.998
RCVRN	-3.67	5	-1.52	0.0647	1086	0.991	0.935	16141	0.998
PPP1R3G	-4.02	6	-1.52	0.0647	1087	0.991	0.935	16140	0.998
MELK	-4.02	6	-1.52	0.0648	1088	0.991	0.935	16139	0.998
RAB3IP	-4.01	6	-1.52	0.0648	1089	0.991	0.935	16138	0.998
GHRL	-2.84	3	-1.52	0.0649	1090	0.991	0.935	16137	0.998
SYCP2	-2.32	2	-1.51	0.065	1091	0.991	0.935	16136	0.998
SEMA4A	-4.01	6	-1.51	0.065	1092	0.991	0.935	16135	0.998
EIF4B	-2.84	3	-1.51	0.065	1093	0.991	0.935	16134	0.998
DRD4	-4.01	6	-1.51	0.065	1094	0.991	0.935	16133	0.998
CORO2A	-4.01	6	-1.51	0.0651	1095	0.991	0.935	16132	0.998
CCDC12	-4.01	6	-1.51	0.0651	1096	0.991	0.935	16131	0.998
CLCA1	-4.01	6	-1.51	0.0651	1097	0.991	0.935	16130	0.998
SLC30A7	-4.01	6	-1.51	0.0651	1098	0.991	0.935	16129	0.998
ZNF444	-3.66	5	-1.51	0.0651	1099	0.991	0.935	16128	0.998
RIMS3	-4.01	6	-1.51	0.0652	1100	0.991	0.935	16127	0.998
KIAA1107	-4	6	-1.51	0.0653	1101	0.991	0.935	16126	0.998
NOTCH3	-4	6	-1.51	0.0653	1102	0.991	0.935	16125	0.998
SNX22	-4	6	-1.51	0.0654	1103	0.991	0.935	16124	0.998
FBXL15	-4	6	-1.51	0.0655	1104	0.991	0.934	16123	0.998
TECPR2	-4	6	-1.51	0.0656	1105	0.991	0.934	16122	0.998
NT5DC1	-1.63	1	-1.51	0.0656	1106	0.991	0.934	16121	0.998
FNDC1	-4	6	-1.51	0.0657	1107	0.991	0.934	16120	0.998
RNF126	-3.26	4	-1.51	0.0658	1108	0.991	0.934	16119	0.998
S100PBP	-4	6	-1.51	0.0658	1109	0.991	0.934	16118	0.998
BDH2	-1.63	1	-1.51	0.0658	1110	0.991	0.934	16117	0.998
KLHL3	-3.99	6	-1.51	0.0659	1111	0.991	0.934	16116	0.998
C11orf48	-3.99	6	-1.51	0.0659	1112	0.991	0.934	16115	0.998
NTN3	-3.99	6	-1.51	0.0659	1113	0.991	0.934	16114	0.998
MTDH	-3.26	4	-1.51	0.066	1114	0.991	0.934	16113	0.998
ACTC1	-3.64	5	-1.51	0.066	1115	0.991	0.934	16112	0.998
CCL14	-3.64	5	-1.5	0.0662	1116	0.991	0.934	16111	0.998
TMEM52	-3.99	6	-1.5	0.0663	1117	0.991	0.934	16110	0.998
DDO	-3.99	6	-1.5	0.0663	1118	0.991	0.934	16109	0.998
EPHB1	-3.99	6	-1.5	0.0663	1119	0.991	0.934	16108	0.998
KALRN	-3.98	6	-1.5	0.0663	1120	0.991	0.934	16107	0.998
TAGLN3	-3.98	6	-1.5	0.0664	1121	0.991	0.934	16106	0.998
FBXO2	-3.98	6	-1.5	0.0664	1122	0.991	0.934	16105	0.998
ALDH9A1	-3.98	6	-1.5	0.0664	1123	0.991	0.934	16104	0.998
LCMT2	-3.98	6	-1.5	0.0667	1124	0.991	0.933	16103	0.998
MRPL42	-2.3	2	-1.5	0.0667	1125	0.991	0.933	16102	0.998
TNFRSF10B	-3.98	6	-1.5	0.0668	1126	0.991	0.933	16101	0.998
ZC3H10	-3.63	5	-1.5	0.0668	1127	0.991	0.933	16100	0.998
SPEM1	-3.97	6	-1.5	0.0669	1128	0.991	0.933	16099	0.998
OR56B4	-2.81	3	-1.5	0.0669	1129	0.991	0.933	16098	0.998
CFH	-3.97	6	-1.5	0.067	1130	0.991	0.933	16097	0.998
LRRC47	-3.97	6	-1.5	0.067	1131	0.991	0.933	16096	0.998
BICD2	-3.97	6	-1.5	0.0671	1132	0.991	0.933	16095	0.998
KIAA1524	-3.62	5	-1.5	0.0671	1133	0.991	0.933	16094	0.998
KLHL31	-3.97	6	-1.5	0.0672	1134	0.991	0.933	16093	0.998
DNAL4	-3.97	6	-1.5	0.0673	1135	0.991	0.933	16092	0.998
ASPDH	-3.96	6	-1.5	0.0674	1136	0.991	0.933	16091	0.998
AGR2	-2.8	3	-1.5	0.0674	1137	0.991	0.933	16090	0.998
TMEM229A	-3.96	6	-1.5	0.0674	1138	0.991	0.933	16089	0.998
NPHS2	-3.96	6	-1.5	0.0674	1139	0.991	0.933	16088	0.998
OSBPL1A	-3.96	6	-1.49	0.0676	1140	0.991	0.932	16087	0.998
LIPF	-3.61	5	-1.49	0.0676	1141	0.991	0.932	16086	0.998
SNX5	-1.62	1	-1.49	0.0676	1142	0.991	0.932	16085	0.998
EDARADD	-3.61	5	-1.49	0.0677	1143	0.991	0.932	16084	0.998
EIF5B	-3.96	6	-1.49	0.0677	1144	0.991	0.932	16083	0.998
C17orf47	-3.61	5	-1.49	0.0678	1145	0.991	0.932	16082	0.998
HPDL	-3.96	6	-1.49	0.0678	1146	0.991	0.932	16081	0.998
SCN1B	-3.96	6	-1.49	0.0679	1147	0.991	0.932	16080	0.998
MED9	-3.61	5	-1.49	0.0679	1148	0.991	0.932	16079	0.998
PRAP1	-3.95	6	-1.49	0.0679	1149	0.991	0.932	16078	0.998
PM20D2	-3.95	6	-1.49	0.068	1150	0.991	0.932	16077	0.998
GUCY2C	-3.95	6	-1.49	0.0681	1151	0.991	0.932	16076	0.998
MAGEA10	-3.61	5	-1.49	0.0681	1152	0.991	0.932	16075	0.998
RPN1	-3.95	6	-1.49	0.0681	1153	0.991	0.932	16074	0.998
KDELC2	-3.95	6	-1.49	0.0682	1154	0.991	0.932	16073	0.998
DBR1	-3.95	6	-1.49	0.0682	1155	0.991	0.932	16072	0.998
SP6	-3.6	5	-1.49	0.0682	1156	0.991	0.932	16071	0.998
CHCHD7	-3.22	4	-1.49	0.0684	1157	0.991	0.932	16070	0.998
TMOD2	-3.94	6	-1.49	0.0686	1158	0.991	0.931	16069	0.998
LSMD1	-3.94	6	-1.49	0.0687	1159	0.991	0.931	16068	0.998
FKBP1B	-3.94	6	-1.49	0.0687	1160	0.991	0.931	16067	0.998
IKBKE	-3.94	6	-1.48	0.0688	1161	0.991	0.931	16066	0.998
H2BFWT	-3.21	4	-1.48	0.0688	1162	0.991	0.931	16065	0.998
FGB	-3.93	6	-1.48	0.0689	1163	0.991	0.931	16064	0.998
TMEM214	-3.93	6	-1.48	0.069	1164	0.991	0.931	16063	0.998
KCNJ8	-3.93	6	-1.48	0.0691	1165	0.991	0.931	16062	0.998
TTF2	-3.93	6	-1.48	0.0692	1166	0.991	0.931	16061	0.998
IRS2	-3.93	6	-1.48	0.0694	1167	0.991	0.931	16060	0.998
TMEM43	-3.93	6	-1.48	0.0694	1168	0.991	0.931	16059	0.998
BTBD10	-3.58	5	-1.48	0.0696	1169	0.991	0.93	16058	0.998
OR7C2	-2.77	3	-1.48	0.0697	1170	0.991	0.93	16057	0.998
NR3C1	-3.92	6	-1.48	0.0697	1171	0.991	0.93	16056	0.998
POLD4	-2.77	3	-1.48	0.0701	1172	0.991	0.93	16055	0.998
OSBPL8	-3.91	6	-1.48	0.0701	1173	0.991	0.93	16054	0.998
IKZF1	-3.91	6	-1.47	0.0701	1174	0.991	0.93	16053	0.998
FBXO10	-3.91	6	-1.47	0.0702	1175	0.991	0.93	16052	0.998
GSTA4	-3.57	5	-1.47	0.0703	1176	0.991	0.93	16051	0.998
NFRKB	-3.91	6	-1.47	0.0703	1177	0.991	0.93	16050	0.998
CHI3L2	-3.91	6	-1.47	0.0704	1178	0.991	0.93	16049	0.998
DEFB123	-2.76	3	-1.47	0.0704	1179	0.991	0.93	16048	0.998
CALML5	-3.57	5	-1.47	0.0705	1180	0.991	0.93	16047	0.998
OR2V1	-3.19	4	-1.47	0.0706	1181	0.991	0.929	16046	0.998
MTNR1B	-3.9	6	-1.47	0.0706	1182	0.991	0.929	16045	0.998
NPY	-3.56	5	-1.47	0.0706	1183	0.991	0.929	16044	0.998
SGSM1	-3.9	6	-1.47	0.0706	1184	0.991	0.929	16043	0.998
TNNI2	-3.56	5	-1.47	0.0706	1185	0.991	0.929	16042	0.998
DNAH17	-3.9	6	-1.47	0.0707	1186	0.991	0.929	16041	0.998
RPA4	-2.76	3	-1.47	0.0707	1187	0.991	0.929	16040	0.998
MAN1A1	-3.9	6	-1.47	0.0708	1188	0.991	0.929	16039	0.998
ZNF185	-3.9	6	-1.47	0.0708	1189	0.991	0.929	16038	0.998
HES6	-3.9	6	-1.47	0.0709	1190	0.991	0.929	16037	0.998
NKIRAS1	-1.59	1	-1.47	0.0709	1191	0.991	0.929	16036	0.998
ADAR	-3.9	6	-1.47	0.0709	1192	0.991	0.929	16035	0.998
KIAA0232	-3.9	6	-1.47	0.0709	1193	0.991	0.929	16034	0.998
FIBCD1	-3.9	6	-1.47	0.071	1194	0.991	0.929	16033	0.998
CMAS	-3.9	6	-1.47	0.071	1195	0.991	0.929	16032	0.998
C12orf55	-3.89	6	-1.47	0.0711	1196	0.991	0.929	16031	0.998
CES5A	-3.89	6	-1.47	0.0712	1197	0.991	0.929	16030	0.998
POU3F4	-3.89	6	-1.47	0.0712	1198	0.991	0.929	16029	0.998
SOX30	-3.89	6	-1.47	0.0714	1199	0.991	0.929	16028	0.998
ENPP3	-3.89	6	-1.47	0.0714	1200	0.991	0.929	16027	0.998
UBXN2A	-1.59	1	-1.47	0.0714	1201	0.991	0.929	16026	0.998
C14orf80	-3.89	6	-1.47	0.0714	1202	0.991	0.929	16025	0.998
LY6G6C	-2.24	2	-1.46	0.0715	1203	0.991	0.928	16024	0.998
HEPN1	-3.17	4	-1.46	0.0716	1204	0.991	0.928	16023	0.998
TTYH2	-3.88	6	-1.46	0.0717	1205	0.991	0.928	16022	0.998
TNFSF4	-3.54	5	-1.46	0.0717	1206	0.991	0.928	16021	0.998
REPIN1	-3.88	6	-1.46	0.0717	1207	0.991	0.928	16020	0.998
FBXL21	-3.54	5	-1.46	0.0718	1208	0.991	0.928	16019	0.998
TTC7A	-3.88	6	-1.46	0.0718	1209	0.991	0.928	16018	0.998
HEMGN	-2.24	2	-1.46	0.0719	1210	0.991	0.928	16017	0.998
CIDEC	-2.74	3	-1.46	0.0719	1211	0.991	0.928	16016	0.998
MRPL21	-3.88	6	-1.46	0.0719	1212	0.991	0.928	16015	0.998
TDRD10	-3.88	6	-1.46	0.072	1213	0.991	0.928	16014	0.998
CDK20	-3.87	6	-1.46	0.0721	1214	0.991	0.928	16013	0.998
STAT5A	-3.87	6	-1.46	0.0721	1215	0.991	0.928	16012	0.998
CDC7	-2.74	3	-1.46	0.0722	1216	0.991	0.928	16011	0.998
FGF14	-3.87	6	-1.46	0.0724	1217	0.991	0.928	16010	0.998
RPGRIP1	-3.87	6	-1.46	0.0724	1218	0.991	0.928	16009	0.998
MESDC1	-3.87	6	-1.46	0.0725	1219	0.991	0.927	16008	0.998
CTSO	-2.23	2	-1.46	0.0726	1220	0.991	0.927	16007	0.998
MAS1	-3.16	4	-1.46	0.0726	1221	0.991	0.927	16006	0.998
SYT10	-3.87	6	-1.46	0.0726	1222	0.991	0.927	16005	0.998
LRRC8A	-3.86	6	-1.46	0.0726	1223	0.991	0.927	16004	0.998
RAMP1	-3.86	6	-1.46	0.0727	1224	0.991	0.927	16003	0.998
AATK	-3.86	6	-1.46	0.0728	1225	0.991	0.927	16002	0.998
CDK16	-3.86	6	-1.46	0.0728	1226	0.991	0.927	16001	0.998
YIF1B	-3.86	6	-1.45	0.0729	1227	0.991	0.927	16000	0.998
NR2F1	-3.86	6	-1.45	0.0729	1228	0.991	0.927	15999	0.998
KIAA1257	-3.86	6	-1.45	0.073	1229	0.991	0.927	15998	0.998
SLC5A2	-3.86	6	-1.45	0.073	1230	0.991	0.927	15997	0.998
ERN2	-3.86	6	-1.45	0.073	1231	0.991	0.927	15996	0.998
BLCAP	-3.15	4	-1.45	0.073	1232	0.991	0.927	15995	0.998
NDEL1	-3.52	5	-1.45	0.0731	1233	0.991	0.927	15994	0.998
CCDC169	-3.15	4	-1.45	0.0731	1234	0.991	0.927	15993	0.998
BEND5	-3.86	6	-1.45	0.0732	1235	0.991	0.927	15992	0.998
CLDN15	-3.85	6	-1.45	0.0732	1236	0.991	0.927	15991	0.998
FRMD6	-3.85	6	-1.45	0.0733	1237	0.991	0.927	15990	0.998
TANGO6	-3.85	6	-1.45	0.0733	1238	0.991	0.927	15989	0.998
RTN4RL1	-3.85	6	-1.45	0.0735	1239	0.991	0.927	15988	0.998
ZNF584	-3.85	6	-1.45	0.0735	1240	0.991	0.926	15987	0.998
EYS	-3.85	6	-1.45	0.0737	1241	0.991	0.926	15986	0.998
ANXA10	-3.51	5	-1.45	0.0737	1242	0.991	0.926	15985	0.998
CYP4F11	-3.84	6	-1.45	0.0738	1243	0.991	0.926	15984	0.998
SLCO1C1	-3.84	6	-1.45	0.0739	1244	0.991	0.926	15983	0.998
KIF16B	-3.84	6	-1.45	0.074	1245	0.991	0.926	15982	0.998
NOTUM	-3.84	6	-1.45	0.0741	1246	0.991	0.926	15981	0.998
TRPM5	-3.84	6	-1.45	0.0741	1247	0.991	0.926	15980	0.998
KRTAP13-3	-1.57	1	-1.45	0.0741	1248	0.991	0.926	15979	0.998
MAST1	-3.84	6	-1.45	0.0742	1249	0.991	0.926	15978	0.998
SLX4IP	-3.84	6	-1.45	0.0742	1250	0.991	0.926	15977	0.998
SLC25A30	-3.84	6	-1.44	0.0743	1251	0.991	0.926	15976	0.998
LRAT	-3.83	6	-1.44	0.0743	1252	0.991	0.926	15975	0.998
LMBR1	-3.5	5	-1.44	0.0743	1253	0.991	0.926	15974	0.998
C1orf95	-3.83	6	-1.44	0.0744	1254	0.991	0.926	15973	0.998
JOSD1	-3.5	5	-1.44	0.0744	1255	0.991	0.926	15972	0.998
CXCR6	-2.71	3	-1.44	0.0745	1256	0.991	0.926	15971	0.998
TRAPPC8	-3.83	6	-1.44	0.0747	1257	0.991	0.925	15970	0.998
TAS2R40	-3.49	5	-1.44	0.0747	1258	0.991	0.925	15969	0.998
GYS1	-3.83	6	-1.44	0.0748	1259	0.991	0.925	15968	0.998
DIAPH3	-3.82	6	-1.44	0.0749	1260	0.991	0.925	15967	0.998
FUK	-3.82	6	-1.44	0.0749	1261	0.991	0.925	15966	0.998
KIFC3	-3.82	6	-1.44	0.075	1262	0.991	0.925	15965	0.998
PCGF2	-3.82	6	-1.44	0.0751	1263	0.991	0.925	15964	0.998
FLRT1	-3.82	6	-1.44	0.0752	1264	0.991	0.925	15963	0.998
TANK	-3.82	6	-1.44	0.0753	1265	0.991	0.925	15962	0.998
PABPC3	-3.12	4	-1.44	0.0754	1266	0.991	0.925	15961	0.998
LETMD1	-3.82	6	-1.44	0.0754	1267	0.991	0.925	15960	0.998
CCDC70	-3.11	4	-1.44	0.0754	1268	0.991	0.925	15959	0.998
ELMO1	-3.81	6	-1.44	0.0755	1269	0.991	0.925	15958	0.998
UEVLD	-3.81	6	-1.44	0.0755	1270	0.991	0.924	15957	0.998
POM121L2	-3.48	5	-1.44	0.0755	1271	0.991	0.924	15956	0.998
KIAA0146	-3.81	6	-1.44	0.0756	1272	0.991	0.924	15955	0.998
SLC7A7	-3.81	6	-1.44	0.0756	1273	0.991	0.924	15954	0.998
SALL4	-3.81	6	-1.44	0.0756	1274	0.991	0.924	15953	0.998
ZNF853	-3.48	5	-1.43	0.0757	1275	0.991	0.924	15952	0.998
FAM221A	-3.81	6	-1.43	0.0757	1276	0.991	0.924	15951	0.998
LRRC16A	-3.81	6	-1.43	0.0758	1277	0.991	0.924	15950	0.998
SIPA1	-3.81	6	-1.43	0.0759	1278	0.991	0.924	15949	0.998
GPR157	-3.81	6	-1.43	0.0759	1279	0.991	0.924	15948	0.998
CD70	-3.81	6	-1.43	0.0759	1280	0.991	0.924	15947	0.998
GDAP1	-3.8	6	-1.43	0.0761	1281	0.991	0.924	15946	0.998
TCF3	-3.8	6	-1.43	0.0761	1282	0.991	0.924	15945	0.998
CPSF3	-3.8	6	-1.43	0.0761	1283	0.991	0.924	15944	0.998
KIFC1	-3.8	6	-1.43	0.0761	1284	0.991	0.924	15943	0.998
FANCL	-2.69	3	-1.43	0.0763	1285	0.991	0.924	15942	0.998
PRPF4B	-3.8	6	-1.43	0.0763	1286	0.991	0.924	15941	0.998
TMEM144	-2.69	3	-1.43	0.0763	1287	0.991	0.924	15940	0.998
ZMYND10	-3.8	6	-1.43	0.0763	1288	0.991	0.924	15939	0.998
C2orf49	-3.8	6	-1.43	0.0764	1289	0.991	0.924	15938	0.998
TLR2	-3.47	5	-1.43	0.0765	1290	0.991	0.924	15937	0.998
C11orf53	-3.47	5	-1.43	0.0765	1291	0.991	0.924	15936	0.998
ZNF16	-3.8	6	-1.43	0.0765	1292	0.991	0.923	15935	0.998
IBSP	-3.1	4	-1.43	0.0766	1293	0.991	0.923	15934	0.998
GUCA2B	-3.1	4	-1.43	0.0767	1294	0.991	0.923	15933	0.998
ANKIB1	-3.79	6	-1.43	0.0768	1295	0.991	0.923	15932	0.998
AJUBA	-3.79	6	-1.43	0.0768	1296	0.991	0.923	15931	0.998
VTI1B	-1.55	1	-1.43	0.0769	1297	0.991	0.923	15930	0.998
YPEL1	-3.46	5	-1.43	0.0769	1298	0.991	0.923	15929	0.998
TMEM42	-3.79	6	-1.43	0.0769	1299	0.991	0.923	15928	0.998
GCNT3	-3.46	5	-1.43	0.077	1300	0.991	0.923	15927	0.998
SNRNP70	-3.78	6	-1.42	0.0771	1301	0.991	0.923	15926	0.998
RFX7	-3.78	6	-1.42	0.0773	1302	0.991	0.923	15925	0.998
NRIP1	-3.45	5	-1.42	0.0774	1303	0.991	0.923	15924	0.998
SYPL2	-3.78	6	-1.42	0.0774	1304	0.991	0.923	15923	0.998
FGF4	-3.78	6	-1.42	0.0774	1305	0.991	0.923	15922	0.998
SLC25A36	-3.09	4	-1.42	0.0774	1306	0.991	0.923	15921	0.998
IL18	-1.54	1	-1.42	0.0775	1307	0.991	0.923	15920	0.998
ZNF608	-3.78	6	-1.42	0.0776	1308	0.991	0.922	15919	0.998
SARDH	-3.78	6	-1.42	0.0776	1309	0.991	0.922	15918	0.998
SETDB1	-3.77	6	-1.42	0.0777	1310	0.991	0.922	15917	0.998
THRSP	-3.08	4	-1.42	0.0778	1311	0.991	0.922	15916	0.998
C1orf115	-3.77	6	-1.42	0.0778	1312	0.991	0.922	15915	0.998
BCL9	-3.77	6	-1.42	0.0778	1313	0.991	0.922	15914	0.998
PRPH	-3.77	6	-1.42	0.0778	1314	0.991	0.922	15913	0.998
CYP11B2	-3.44	5	-1.42	0.0779	1315	0.991	0.922	15912	0.998
PRM2	-3.44	5	-1.42	0.0779	1316	0.991	0.922	15911	0.998
PLBD1	-3.77	6	-1.42	0.078	1317	0.991	0.922	15910	0.998
C7orf25	-3.77	6	-1.42	0.0781	1318	0.991	0.922	15909	0.998
AKAP6	-3.77	6	-1.42	0.0781	1319	0.991	0.922	15908	0.998
NEUROG1	-2.66	3	-1.42	0.0783	1320	0.991	0.922	15907	0.998
NR5A1	-3.76	6	-1.42	0.0783	1321	0.991	0.922	15906	0.998
HINT3	-3.76	6	-1.42	0.0783	1322	0.991	0.922	15905	0.998
FLYWCH1	-3.76	6	-1.42	0.0784	1323	0.991	0.922	15904	0.998
ZNF605	-2.66	3	-1.42	0.0784	1324	0.991	0.922	15903	0.998
TLX2	-3.76	6	-1.42	0.0785	1325	0.991	0.922	15902	0.998
TUSC2	-3.43	5	-1.42	0.0785	1326	0.991	0.922	15901	0.998
F2R	-3.76	6	-1.41	0.0786	1327	0.991	0.921	15900	0.998
RARRES3	-3.76	6	-1.41	0.0786	1328	0.991	0.921	15899	0.998
IL36B	-3.07	4	-1.41	0.0786	1329	0.991	0.921	15898	0.998
HIATL1	-3.76	6	-1.41	0.0787	1330	0.991	0.921	15897	0.998
SNAI2	-3.75	6	-1.41	0.0788	1331	0.991	0.921	15896	0.998
KRTAP20-3	-1.53	1	-1.41	0.0789	1332	0.991	0.921	15895	0.998
PHLDB3	-3.75	6	-1.41	0.0789	1333	0.991	0.921	15894	0.998
TP53I11	-3.75	6	-1.41	0.0789	1334	0.991	0.921	15893	0.998
AARS	-3.75	6	-1.41	0.079	1335	0.991	0.921	15892	0.998
BTG3	-3.75	6	-1.41	0.0791	1336	0.991	0.921	15891	0.998
BAZ1A	-3.75	6	-1.41	0.0791	1337	0.991	0.921	15890	0.998
HDAC2	-3.75	6	-1.41	0.0792	1338	0.991	0.921	15889	0.998
DNAH11	-3.75	6	-1.41	0.0792	1339	0.991	0.921	15888	0.998
C20orf96	-3.75	6	-1.41	0.0793	1340	0.991	0.921	15887	0.998
CREB3L2	-3.75	6	-1.41	0.0793	1341	0.991	0.921	15886	0.998
HAPLN4	-3.75	6	-1.41	0.0794	1342	0.991	0.921	15885	0.998
DSCAM	-3.75	6	-1.41	0.0794	1343	0.991	0.921	15884	0.998
TMCO3	-3.74	6	-1.41	0.0794	1344	0.991	0.921	15883	0.998
PCMTD1	-1.53	1	-1.41	0.0795	1345	0.991	0.921	15882	0.998
HOMER1	-3.42	5	-1.41	0.0796	1346	0.991	0.92	15881	0.998
PITHD1	-3.74	6	-1.41	0.0796	1347	0.991	0.92	15880	0.998
EPS15L1	-3.74	6	-1.41	0.0797	1348	0.991	0.92	15879	0.998
L1CAM	-3.74	6	-1.41	0.0797	1349	0.991	0.92	15878	0.998
RPGRIP1L	-3.74	6	-1.41	0.0797	1350	0.991	0.92	15877	0.998
CDK2AP1	-2.16	2	-1.41	0.0799	1351	0.991	0.92	15876	0.998
DNAJC14	-3.74	6	-1.41	0.0799	1352	0.991	0.92	15875	0.998
OTUD5	-3.73	6	-1.4	0.0801	1353	0.991	0.92	15874	0.998
GATAD1	-2.64	3	-1.4	0.0801	1354	0.991	0.92	15873	0.998
PTGER4	-3.41	5	-1.4	0.0802	1355	0.991	0.92	15872	0.998
GPC6	-3.73	6	-1.4	0.0802	1356	0.991	0.92	15871	0.998
PHKA2	-3.73	6	-1.4	0.0802	1357	0.991	0.92	15870	0.998
CTR9	-3.73	6	-1.4	0.0803	1358	0.991	0.92	15869	0.998
SHC4	-3.73	6	-1.4	0.0803	1359	0.991	0.92	15868	0.998
FAM173B	-3.73	6	-1.4	0.0804	1360	0.991	0.92	15867	0.998
ATAD2	-3.73	6	-1.4	0.0804	1361	0.991	0.92	15866	0.998
FAM198A	-3.73	6	-1.4	0.0805	1362	0.991	0.92	15865	0.998
IQUB	-3.73	6	-1.4	0.0806	1363	0.991	0.919	15864	0.998
GLA	-3.72	6	-1.4	0.0806	1364	0.991	0.919	15863	0.998
AMBP	-3.72	6	-1.4	0.0806	1365	0.991	0.919	15862	0.998
ZKSCAN2	-3.72	6	-1.4	0.0807	1366	0.991	0.919	15861	0.998
KDM4E	-3.04	4	-1.4	0.0807	1367	0.991	0.919	15860	0.998
DNAJB2	-3.72	6	-1.4	0.0808	1368	0.991	0.919	15859	0.998
FBXO27	-3.72	6	-1.4	0.0809	1369	0.991	0.919	15858	0.998
SLC25A47	-3.72	6	-1.4	0.0809	1370	0.991	0.919	15857	0.998
TTBK1	-3.72	6	-1.4	0.081	1371	0.991	0.919	15856	0.998
SSSCA1	-3.72	6	-1.4	0.081	1372	0.991	0.919	15855	0.998
ALOX12B	-3.72	6	-1.4	0.081	1373	0.991	0.919	15854	0.998
EPN3	-3.71	6	-1.4	0.0812	1374	0.991	0.919	15853	0.998
PTTG1	-2.14	2	-1.4	0.0812	1375	0.991	0.919	15852	0.998
TMEM141	-2.63	3	-1.4	0.0813	1376	0.991	0.919	15851	0.998
PRX	-3.71	6	-1.4	0.0813	1377	0.991	0.919	15850	0.998
HOXA1	-3.71	6	-1.4	0.0814	1378	0.991	0.919	15849	0.998
LRRIQ3	-2.14	2	-1.39	0.0815	1379	0.991	0.918	15848	0.998
AMBRA1	-3.71	6	-1.39	0.0816	1380	0.991	0.918	15847	0.998
BEX2	-1.51	1	-1.39	0.0817	1381	0.991	0.918	15846	0.998
VANGL1	-3.71	6	-1.39	0.0817	1382	0.991	0.918	15845	0.998
IFI30	-3.71	6	-1.39	0.0817	1383	0.991	0.918	15844	0.998
LIN37	-3.71	6	-1.39	0.0817	1384	0.991	0.918	15843	0.998
FAM83E	-3.7	6	-1.39	0.0819	1385	0.991	0.918	15842	0.998
SRGAP1	-3.7	6	-1.39	0.0819	1386	0.991	0.918	15841	0.998
ZDHHC23	-3.7	6	-1.39	0.082	1387	0.991	0.918	15840	0.998
SPTBN2	-3.7	6	-1.39	0.082	1388	0.991	0.918	15839	0.998
GALT	-3.7	6	-1.39	0.0821	1389	0.991	0.918	15838	0.998
ARFGEF2	-3.7	6	-1.39	0.0823	1390	0.991	0.918	15837	0.998
SPRN	-3.02	4	-1.39	0.0823	1391	0.991	0.918	15836	0.998
TMEM14E	-2.61	3	-1.39	0.0823	1392	0.991	0.918	15835	0.998
C19orf80	-3.69	6	-1.39	0.0824	1393	0.991	0.918	15834	0.998
DACH2	-3.69	6	-1.39	0.0824	1394	0.991	0.918	15833	0.998
RARRES2	-3.37	5	-1.39	0.0825	1395	0.991	0.917	15832	0.998
SEC11A	-1.51	1	-1.39	0.0826	1396	0.991	0.917	15831	0.998
GNG12	-1.51	1	-1.39	0.0826	1397	0.991	0.917	15830	0.998
CEACAM5	-3.01	4	-1.39	0.0828	1398	0.991	0.917	15829	0.998
TECPR1	-3.69	6	-1.39	0.083	1399	0.991	0.917	15828	0.998
RECK	-3.68	6	-1.39	0.083	1400	0.991	0.917	15827	0.998
CDH5	-3.68	6	-1.39	0.083	1401	0.991	0.917	15826	0.998
PEBP4	-3.68	6	-1.39	0.083	1402	0.991	0.917	15825	0.998
RAB33A	-3.68	6	-1.38	0.083	1403	0.991	0.917	15824	0.998
RAD21	-2.13	2	-1.38	0.0831	1404	0.991	0.917	15823	0.998
ZNF785	-3.36	5	-1.38	0.0831	1405	0.991	0.917	15822	0.998
WDR45B	-3.68	6	-1.38	0.0833	1406	0.991	0.917	15821	0.998
PDSS1	-2.6	3	-1.38	0.0833	1407	0.991	0.917	15820	0.998
PRR3	-3.36	5	-1.38	0.0834	1408	0.991	0.917	15819	0.998
SECISBP2	-3.68	6	-1.38	0.0835	1409	0.991	0.917	15818	0.998
FAM20A	-3.68	6	-1.38	0.0836	1410	0.991	0.916	15817	0.998
HEXB	-3.67	6	-1.38	0.0837	1411	0.991	0.916	15816	0.998
SOGA3	-3.67	6	-1.38	0.0838	1412	0.991	0.916	15815	0.998
ARMC5	-3.67	6	-1.38	0.0838	1413	0.991	0.916	15814	0.998
C1orf186	-2.6	3	-1.38	0.0838	1414	0.991	0.916	15813	0.998
KRT83	-2.12	2	-1.38	0.0839	1415	0.991	0.916	15812	0.998
MAGEA1	-1.5	1	-1.38	0.084	1416	0.991	0.916	15811	0.998
CHIA	-3.35	5	-1.38	0.0841	1417	0.991	0.916	15810	0.998
CXCL6	-2.12	2	-1.38	0.0841	1418	0.991	0.916	15809	0.998
FBLN1	-3.67	6	-1.38	0.0842	1419	0.991	0.916	15808	0.998
THPO	-3.67	6	-1.38	0.0842	1420	0.991	0.916	15807	0.998
ONECUT1	-3.34	5	-1.38	0.0843	1421	0.991	0.916	15806	0.998
ANKRD17	-3.66	6	-1.38	0.0844	1422	0.991	0.916	15805	0.998
SLC18A2	-3.66	6	-1.37	0.0846	1423	0.991	0.915	15804	0.998
CD9	-3.66	6	-1.37	0.0846	1424	0.991	0.915	15803	0.998
POLR2L	-3.66	6	-1.37	0.0847	1425	0.991	0.915	15802	0.998
SHROOM1	-3.66	6	-1.37	0.0847	1426	0.991	0.915	15801	0.998
CCL25	-2.11	2	-1.37	0.0848	1427	0.991	0.915	15800	0.998
SALL3	-3.65	6	-1.37	0.0848	1428	0.991	0.915	15799	0.998
SERPINB8	-3.34	5	-1.37	0.0848	1429	0.991	0.915	15798	0.998
CNR1	-3.65	6	-1.37	0.0849	1430	0.991	0.915	15797	0.998
ZFP62	-3.33	5	-1.37	0.0849	1431	0.991	0.915	15796	0.998
DOCK7	-3.65	6	-1.37	0.085	1432	0.991	0.915	15795	0.998
PIAS2	-3.65	6	-1.37	0.085	1433	0.991	0.915	15794	0.998
NABP2	-3.33	5	-1.37	0.0851	1434	0.991	0.915	15793	0.998
FNIP2	-3.64	6	-1.37	0.0855	1435	0.991	0.915	15792	0.998
BRD2	-3.64	6	-1.37	0.0855	1436	0.991	0.914	15791	0.998
NAT8L	-3.64	6	-1.37	0.0857	1437	0.991	0.914	15790	0.997
PCDH12	-3.64	6	-1.37	0.0857	1438	0.991	0.914	15789	0.997
INPP5B	-3.64	6	-1.37	0.0857	1439	0.991	0.914	15788	0.997
TCF7L1	-3.64	6	-1.37	0.0857	1440	0.991	0.914	15787	0.997
MAML3	-3.64	6	-1.37	0.086	1441	0.991	0.914	15786	0.997
LY6G5B	-3.32	5	-1.37	0.086	1442	0.991	0.914	15785	0.997
ERAP2	-3.64	6	-1.37	0.086	1443	0.991	0.914	15784	0.997
TIMM8B	-2.57	3	-1.36	0.0862	1444	0.991	0.914	15783	0.997
SCN2B	-3.63	6	-1.36	0.0863	1445	0.991	0.914	15782	0.997
UST	-3.63	6	-1.36	0.0864	1446	0.991	0.914	15781	0.997
HOMER2	-3.63	6	-1.36	0.0864	1447	0.991	0.914	15780	0.997
C9orf72	-2.09	2	-1.36	0.0865	1448	0.991	0.913	15779	0.997
TMTC3	-3.62	6	-1.36	0.0868	1449	0.991	0.913	15778	0.997
BFSP1	-3.62	6	-1.36	0.0868	1450	0.991	0.913	15777	0.997
GSDMD	-3.62	6	-1.36	0.0869	1451	0.991	0.913	15776	0.997
OLFM2	-3.62	6	-1.36	0.087	1452	0.991	0.913	15775	0.997
TMEM200B	-2.96	4	-1.36	0.087	1453	0.991	0.913	15774	0.997
AIF1L	-3.62	6	-1.36	0.0872	1454	0.991	0.913	15773	0.997
ING1	-3.62	6	-1.36	0.0873	1455	0.991	0.913	15772	0.997
CALHM1	-3.61	6	-1.36	0.0873	1456	0.991	0.913	15771	0.997
FAM171B	-3.61	6	-1.36	0.0874	1457	0.991	0.913	15770	0.997
TINAG	-2.95	4	-1.36	0.0874	1458	0.991	0.913	15769	0.997
IARS2	-3.61	6	-1.36	0.0876	1459	0.991	0.912	15768	0.997
TAOK1	-3.61	6	-1.36	0.0876	1460	0.991	0.912	15767	0.997
TTLL10	-3.61	6	-1.36	0.0876	1461	0.991	0.912	15766	0.997
DNAJA2	-3.61	6	-1.35	0.0878	1462	0.991	0.912	15765	0.997
ZNF616	-1.47	1	-1.35	0.0878	1463	0.991	0.912	15764	0.997
PISD	-3.6	6	-1.35	0.088	1464	0.991	0.912	15763	0.997
EMC7	-3.29	5	-1.35	0.088	1465	0.991	0.912	15762	0.997
PEF1	-3.6	6	-1.35	0.0882	1466	0.991	0.912	15761	0.996
C6orf100	-2.54	3	-1.35	0.0883	1467	0.991	0.912	15760	0.996
KCNMB1	-3.6	6	-1.35	0.0883	1468	0.991	0.912	15759	0.996
RBM22	-3.6	6	-1.35	0.0884	1469	0.991	0.912	15758	0.996
CYP2W1	-3.6	6	-1.35	0.0885	1470	0.991	0.911	15757	0.996
RPS2	-1.47	1	-1.35	0.0885	1471	0.991	0.911	15756	0.996
OR6B2	-1.47	1	-1.35	0.0886	1472	0.991	0.911	15755	0.996
UTS2R	-3.59	6	-1.35	0.0886	1473	0.991	0.911	15754	0.996
SPINK8	-3.28	5	-1.35	0.0887	1474	0.991	0.911	15753	0.996
RPS15A	-1.47	1	-1.35	0.0888	1475	0.991	0.911	15752	0.996
ZNF304	-3.59	6	-1.35	0.0888	1476	0.991	0.911	15751	0.996
EFCAB11	-2.07	2	-1.35	0.0888	1477	0.991	0.911	15750	0.996
ZNF746	-3.59	6	-1.35	0.0889	1478	0.991	0.911	15749	0.996
NME1	-2.93	4	-1.35	0.0892	1479	0.991	0.911	15748	0.996
DDX54	-3.58	6	-1.34	0.0893	1480	0.991	0.911	15747	0.996
KHDRBS1	-3.58	6	-1.34	0.0893	1481	0.991	0.911	15746	0.996
TMEM175	-3.58	6	-1.34	0.0894	1482	0.991	0.911	15745	0.996
TXNRD3NB	-2.92	4	-1.34	0.0894	1483	0.991	0.911	15744	0.996
POLA2	-3.58	6	-1.34	0.0895	1484	0.991	0.911	15743	0.996
LOH12CR1	-3.58	6	-1.34	0.0896	1485	0.991	0.91	15742	0.996
NLRP8	-3.58	6	-1.34	0.0897	1486	0.991	0.91	15741	0.996
PPP1R16B	-3.58	6	-1.34	0.0897	1487	0.991	0.91	15740	0.996
GMNN	-2.06	2	-1.34	0.0897	1488	0.991	0.91	15739	0.996
FA2H	-3.57	6	-1.34	0.0899	1489	0.991	0.91	15738	0.996
LAMTOR4	-2.53	3	-1.34	0.0901	1490	0.991	0.91	15737	0.996
SGSM2	-3.57	6	-1.34	0.0901	1491	0.991	0.91	15736	0.996
FSTL4	-3.57	6	-1.34	0.0901	1492	0.991	0.91	15735	0.996
TRMT12	-3.57	6	-1.34	0.0902	1493	0.991	0.91	15734	0.996
PIGZ	-3.57	6	-1.34	0.0903	1494	0.991	0.91	15733	0.996
C10orf105	-2.06	2	-1.34	0.0903	1495	0.991	0.91	15732	0.996
XPO4	-3.57	6	-1.34	0.0903	1496	0.991	0.91	15731	0.996
CYP26C1	-3.57	6	-1.34	0.0903	1497	0.991	0.91	15730	0.996
LYRM7	-1.46	1	-1.34	0.0904	1498	0.991	0.91	15729	0.996
TP53INP2	-3.57	6	-1.34	0.0904	1499	0.991	0.91	15728	0.996
GRK1	-3.57	6	-1.34	0.0904	1500	0.991	0.91	15727	0.996
MROH8	-3.57	6	-1.34	0.0904	1501	0.991	0.91	15726	0.996
KLHL25	-3.57	6	-1.34	0.0904	1502	0.991	0.91	15725	0.996
ATG10	-2.52	3	-1.34	0.0906	1503	0.991	0.909	15724	0.996
ZNF132	-3.25	5	-1.34	0.0906	1504	0.991	0.909	15723	0.996
HSD17B14	-3.56	6	-1.34	0.0906	1505	0.991	0.909	15722	0.996
IL2	-2.06	2	-1.34	0.0907	1506	0.991	0.909	15721	0.996
MZT1	-1.45	1	-1.34	0.0907	1507	0.991	0.909	15720	0.996
OR2AG2	-2.06	2	-1.34	0.0908	1508	0.991	0.909	15719	0.996
CNTNAP2	-3.56	6	-1.34	0.0908	1509	0.991	0.909	15718	0.996
FOS	-3.56	6	-1.34	0.0909	1510	0.991	0.909	15717	0.996
DNA2	-3.56	6	-1.33	0.0909	1511	0.991	0.909	15716	0.996
WNT9B	-3.56	6	-1.33	0.091	1512	0.991	0.909	15715	0.996
EFCAB9	-1.45	1	-1.33	0.091	1513	0.991	0.909	15714	0.996
ARAP1	-3.56	6	-1.33	0.091	1514	0.991	0.909	15713	0.996
ZPBP2	-2.05	2	-1.33	0.0912	1515	0.991	0.909	15712	0.996
ZKSCAN7	-3.24	5	-1.33	0.0913	1516	0.991	0.909	15711	0.996
RMDN2	-3.55	6	-1.33	0.0914	1517	0.991	0.909	15710	0.996
BAZ2B	-3.55	6	-1.33	0.0914	1518	0.991	0.909	15709	0.996
RNF130	-3.55	6	-1.33	0.0914	1519	0.991	0.909	15708	0.996
VWA9	-3.55	6	-1.33	0.0915	1520	0.991	0.909	15707	0.996
RNASE10	-2.51	3	-1.33	0.0915	1521	0.991	0.908	15706	0.996
RAB32	-3.55	6	-1.33	0.0916	1522	0.991	0.908	15705	0.996
FUT7	-3.24	5	-1.33	0.0916	1523	0.991	0.908	15704	0.996
LRP2	-3.55	6	-1.33	0.0917	1524	0.991	0.908	15703	0.996
MYF6	-3.55	6	-1.33	0.0917	1525	0.991	0.908	15702	0.996
PSORS1C2	-3.23	5	-1.33	0.0919	1526	0.991	0.908	15701	0.996
C16orf97	-2.89	4	-1.33	0.092	1527	0.991	0.908	15700	0.996
CFTR	-3.54	6	-1.33	0.0921	1528	0.991	0.908	15699	0.996
SLC29A4	-3.23	5	-1.33	0.0921	1529	0.991	0.908	15698	0.996
EFS	-3.54	6	-1.33	0.0921	1530	0.991	0.908	15697	0.996
ADGB	-3.54	6	-1.33	0.0922	1531	0.991	0.908	15696	0.996
SSRP1	-3.54	6	-1.33	0.0922	1532	0.991	0.908	15695	0.996
CNTFR	-3.54	6	-1.33	0.0923	1533	0.991	0.908	15694	0.996
MTCH1	-3.54	6	-1.33	0.0924	1534	0.991	0.908	15693	0.996
COA4	-2.89	4	-1.33	0.0924	1535	0.991	0.908	15692	0.996
SSTR4	-3.23	5	-1.33	0.0924	1536	0.991	0.908	15691	0.996
IMPA2	-3.53	6	-1.33	0.0925	1537	0.991	0.908	15690	0.996
CLSTN3	-3.53	6	-1.33	0.0925	1538	0.991	0.907	15689	0.996
UBE2Z	-3.53	6	-1.33	0.0925	1539	0.991	0.907	15688	0.996
EID3	-3.22	5	-1.33	0.0926	1540	0.991	0.907	15687	0.996
ICA1	-3.53	6	-1.32	0.0926	1541	0.991	0.907	15686	0.996
HOXB2	-3.53	6	-1.32	0.0927	1542	0.991	0.907	15685	0.996
VSTM2B	-3.53	6	-1.32	0.0927	1543	0.991	0.907	15684	0.996
RANGAP1	-3.53	6	-1.32	0.0927	1544	0.991	0.907	15683	0.996
VSTM2A	-3.53	6	-1.32	0.0928	1545	0.991	0.907	15682	0.996
GDF2	-3.53	6	-1.32	0.0929	1546	0.991	0.907	15681	0.996
RBM14	-3.53	6	-1.32	0.0929	1547	0.991	0.907	15680	0.996
GPR68	-3.22	5	-1.32	0.093	1548	0.991	0.907	15679	0.996
PNOC	-3.22	5	-1.32	0.093	1549	0.991	0.907	15678	0.996
DCT	-3.53	6	-1.32	0.093	1550	0.991	0.907	15677	0.996
SPINK6	-1.44	1	-1.32	0.0931	1551	0.991	0.907	15676	0.996
NUDT5	-2.87	4	-1.32	0.0934	1552	0.991	0.907	15675	0.996
IQCF1	-2.49	3	-1.32	0.0936	1553	0.991	0.906	15674	0.996
AGPAT5	-3.21	5	-1.32	0.0936	1554	0.991	0.906	15673	0.996
CCR6	-2.87	4	-1.32	0.0937	1555	0.991	0.906	15672	0.996
BCL2L1	-3.51	6	-1.32	0.0939	1556	0.991	0.906	15671	0.996
SAGE1	-2.87	4	-1.32	0.0941	1557	0.991	0.906	15670	0.996
KIAA0355	-3.51	6	-1.32	0.0941	1558	0.991	0.906	15669	0.996
PTPRB	-3.51	6	-1.32	0.0942	1559	0.991	0.906	15668	0.996
INHBA	-3.51	6	-1.31	0.0943	1560	0.991	0.906	15667	0.996
RFXANK	-3.51	6	-1.31	0.0943	1561	0.991	0.906	15666	0.996
TOR1AIP2	-3.5	6	-1.31	0.0944	1562	0.991	0.906	15665	0.996
VIM	-3.5	6	-1.31	0.0945	1563	0.991	0.906	15664	0.996
DOC2A	-3.5	6	-1.31	0.0945	1564	0.991	0.905	15663	0.996
APP	-3.5	6	-1.31	0.0946	1565	0.991	0.905	15662	0.996
FKBP8	-3.5	6	-1.31	0.0946	1566	0.991	0.905	15661	0.996
ALLC	-3.5	6	-1.31	0.0946	1567	0.991	0.905	15660	0.996
YIPF2	-3.5	6	-1.31	0.0946	1568	0.991	0.905	15659	0.996
NTSR1	-3.5	6	-1.31	0.0948	1569	0.991	0.905	15658	0.996
NFE2L1	-3.5	6	-1.31	0.0948	1570	0.991	0.905	15657	0.996
PCID2	-3.5	6	-1.31	0.0948	1571	0.991	0.905	15656	0.996
MYH11	-3.5	6	-1.31	0.0949	1572	0.991	0.905	15655	0.996
GSTP1	-3.5	6	-1.31	0.095	1573	0.991	0.905	15654	0.996
PSTPIP1	-3.5	6	-1.31	0.095	1574	0.991	0.905	15653	0.996
SYP	-3.5	6	-1.31	0.095	1575	0.991	0.905	15652	0.996
SLC43A1	-3.49	6	-1.31	0.0951	1576	0.991	0.905	15651	0.996
CD300LB	-3.49	6	-1.31	0.0951	1577	0.991	0.905	15650	0.996
ITIH6	-3.49	6	-1.31	0.0952	1578	0.991	0.905	15649	0.996
TMEM86B	-3.49	6	-1.31	0.0952	1579	0.991	0.905	15648	0.996
ADCY10	-3.49	6	-1.31	0.0953	1580	0.991	0.905	15647	0.996
ITM2C	-3.49	6	-1.31	0.0953	1581	0.991	0.905	15646	0.996
C10orf131	-1.42	1	-1.31	0.0954	1582	0.991	0.905	15645	0.996
LRRK1	-3.49	6	-1.31	0.0954	1583	0.991	0.905	15644	0.996
NPAS4	-3.49	6	-1.31	0.0955	1584	0.991	0.904	15643	0.996
ALG12	-3.49	6	-1.31	0.0956	1585	0.991	0.904	15642	0.996
ARID1B	-3.49	6	-1.31	0.0956	1586	0.991	0.904	15641	0.996
TMC2	-3.49	6	-1.31	0.0956	1587	0.991	0.904	15640	0.996
KIAA0226	-3.49	6	-1.31	0.0957	1588	0.991	0.904	15639	0.996
IRAK2	-3.48	6	-1.31	0.0958	1589	0.991	0.904	15638	0.996
MANEA	-2.84	4	-1.31	0.0958	1590	0.991	0.904	15637	0.996
ARFGAP3	-3.48	6	-1.31	0.0959	1591	0.991	0.904	15636	0.996
DPM2	-2.84	4	-1.31	0.0959	1592	0.991	0.904	15635	0.996
RNF34	-3.48	6	-1.3	0.096	1593	0.991	0.904	15634	0.996
TSPAN6	-2.84	4	-1.3	0.0963	1594	0.991	0.904	15633	0.996
MTHFR	-3.48	6	-1.3	0.0964	1595	0.991	0.904	15632	0.996
RSPO4	-3.47	6	-1.3	0.0964	1596	0.991	0.904	15631	0.996
RNF20	-3.47	6	-1.3	0.0966	1597	0.991	0.903	15630	0.996
FAM175A	-2.45	3	-1.3	0.0966	1598	0.991	0.903	15629	0.996
PRAM1	-3.47	6	-1.3	0.0967	1599	0.991	0.903	15628	0.996
JMY	-3.47	6	-1.3	0.0967	1600	0.991	0.903	15627	0.996
RLBP1	-3.47	6	-1.3	0.0968	1601	0.991	0.903	15626	0.996
AHSA2	-2	2	-1.3	0.0968	1602	0.991	0.903	15625	0.996
MLXIP	-3.47	6	-1.3	0.0968	1603	0.991	0.903	15624	0.996
NR2C1	-3.47	6	-1.3	0.0969	1604	0.991	0.903	15623	0.996
CCDC178	-2	2	-1.3	0.0969	1605	0.991	0.903	15622	0.996
NADSYN1	-3.46	6	-1.3	0.0971	1606	0.991	0.903	15621	0.996
CDK14	-3.46	6	-1.3	0.0972	1607	0.991	0.903	15620	0.996
HRSP12	-2.45	3	-1.3	0.0972	1608	0.991	0.903	15619	0.996
RIC8A	-3.46	6	-1.3	0.0974	1609	0.991	0.903	15618	0.996
STS	-3.46	6	-1.3	0.0974	1610	0.991	0.903	15617	0.996
NTRK1	-3.46	6	-1.3	0.0974	1611	0.991	0.903	15616	0.996
SMPDL3B	-3.46	6	-1.3	0.0975	1612	0.991	0.903	15615	0.996
IL17RC	-3.46	6	-1.3	0.0976	1613	0.991	0.902	15614	0.996
GLYATL3	-3.16	5	-1.3	0.0976	1614	0.991	0.902	15613	0.996
GNPTAB	-3.46	6	-1.29	0.0977	1615	0.991	0.902	15612	0.996
SOCS1	-3.15	5	-1.29	0.0977	1616	0.991	0.902	15611	0.996
INPPL1	-3.45	6	-1.29	0.0978	1617	0.991	0.902	15610	0.996
ATP5B	-3.45	6	-1.29	0.0978	1618	0.991	0.902	15609	0.996
TCP11L2	-3.45	6	-1.29	0.0979	1619	0.991	0.902	15608	0.996
CSNK1A1L	-2.82	4	-1.29	0.0979	1620	0.991	0.902	15607	0.996
CKMT2	-3.45	6	-1.29	0.098	1621	0.991	0.902	15606	0.996
SDF2L1	-3.45	6	-1.29	0.0981	1622	0.991	0.902	15605	0.996
BRICD5	-3.45	6	-1.29	0.0982	1623	0.991	0.902	15604	0.996
CA13	-3.45	6	-1.29	0.0982	1624	0.991	0.902	15603	0.996
PFKL	-3.45	6	-1.29	0.0982	1625	0.991	0.902	15602	0.996
OR4K15	-1.41	1	-1.29	0.0983	1626	0.991	0.902	15601	0.996
BTN3A3	-2.44	3	-1.29	0.0983	1627	0.991	0.902	15600	0.996
GRPR	-3.45	6	-1.29	0.0984	1628	0.991	0.902	15599	0.996
TBXA2R	-3.45	6	-1.29	0.0984	1629	0.991	0.902	15598	0.996
FFAR2	-3.44	6	-1.29	0.0984	1630	0.991	0.902	15597	0.996
OXA1L	-3.44	6	-1.29	0.0986	1631	0.991	0.901	15596	0.996
GPRIN3	-3.14	5	-1.29	0.0986	1632	0.991	0.901	15595	0.996
APEH	-3.44	6	-1.29	0.0987	1633	0.991	0.901	15594	0.996
UBE3A	-1.99	2	-1.29	0.0988	1634	0.991	0.901	15593	0.996
ANXA11	-3.44	6	-1.29	0.0988	1635	0.991	0.901	15592	0.996
MED16	-3.44	6	-1.29	0.0989	1636	0.991	0.901	15591	0.996
KIF22	-3.44	6	-1.29	0.0991	1637	0.991	0.901	15590	0.995
XIRP1	-3.43	6	-1.29	0.0992	1638	0.991	0.901	15589	0.995
IRX4	-3.43	6	-1.29	0.0992	1639	0.991	0.901	15588	0.995
KCND2	-3.43	6	-1.29	0.0992	1640	0.991	0.901	15587	0.995
PDGFRB	-3.43	6	-1.29	0.0993	1641	0.991	0.901	15586	0.995
JAG1	-3.43	6	-1.29	0.0993	1642	0.991	0.901	15585	0.995
C15orf52	-3.43	6	-1.29	0.0993	1643	0.991	0.901	15584	0.995
C17orf77	-2.8	4	-1.29	0.0993	1644	0.991	0.901	15583	0.995
OSBPL10	-3.43	6	-1.29	0.0994	1645	0.991	0.901	15582	0.995
HTR4	-3.43	6	-1.28	0.0994	1646	0.991	0.901	15581	0.995
F8	-3.43	6	-1.28	0.0995	1647	0.991	0.901	15580	0.995
ALDH7A1	-3.43	6	-1.28	0.0995	1648	0.991	0.9	15579	0.995
C11orf1	-2.42	3	-1.28	0.0997	1649	0.991	0.9	15578	0.995
ARHGAP31	-3.43	6	-1.28	0.0998	1650	0.991	0.9	15577	0.995
SLC27A4	-3.42	6	-1.28	0.0998	1651	0.991	0.9	15576	0.995
SYNGR2	-2.8	4	-1.28	0.0999	1652	0.991	0.9	15575	0.995
HCFC2	-3.42	6	-1.28	0.1	1653	0.991	0.9	15574	0.995
CRLF3	-3.42	6	-1.28	0.1	1654	0.991	0.9	15573	0.995
BCOR	-3.42	6	-1.28	0.1	1655	0.991	0.9	15572	0.995
PLAC9	-1.98	2	-1.28	0.1	1656	0.991	0.9	15571	0.995
SCT	-2.79	4	-1.28	0.1	1657	0.991	0.9	15570	0.995
GDF5	-3.42	6	-1.28	0.1	1658	0.991	0.9	15569	0.995
MSRA	-3.42	6	-1.28	0.1	1659	0.991	0.9	15568	0.995
MFSD5	-3.42	6	-1.28	0.1	1660	0.991	0.9	15567	0.995
VWA8	-3.42	6	-1.28	0.1	1661	0.991	0.9	15566	0.995
USHBP1	-3.42	6	-1.28	0.1	1662	0.991	0.9	15565	0.995
COX8C	-2.79	4	-1.28	0.101	1663	0.991	0.899	15564	0.995
SSC5D	-3.41	6	-1.28	0.101	1664	0.991	0.899	15563	0.995
BCL11B	-3.41	6	-1.28	0.101	1665	0.991	0.899	15562	0.995
GPR12	-3.41	6	-1.28	0.101	1666	0.991	0.899	15561	0.995
SYCN	-3.41	6	-1.27	0.101	1667	0.991	0.899	15560	0.995
PSMB9	-3.4	6	-1.27	0.101	1668	0.991	0.899	15559	0.995
TAX1BP1	-3.4	6	-1.27	0.101	1669	0.991	0.899	15558	0.995
ACVR2B	-3.4	6	-1.27	0.101	1670	0.991	0.899	15557	0.995
TTC9B	-3.4	6	-1.27	0.101	1671	0.991	0.899	15556	0.995
LUZP2	-3.4	6	-1.27	0.101	1672	0.991	0.899	15555	0.995
REV3L	-3.4	6	-1.27	0.102	1673	0.991	0.898	15554	0.995
ENG	-3.4	6	-1.27	0.102	1674	0.991	0.898	15553	0.995
ZFP92	-3.1	5	-1.27	0.102	1675	0.991	0.898	15552	0.995
RAB28	-3.4	6	-1.27	0.102	1676	0.991	0.898	15551	0.995
TRAPPC10	-3.4	6	-1.27	0.102	1677	0.991	0.898	15550	0.995
ATF5	-3.4	6	-1.27	0.102	1678	0.991	0.898	15549	0.995
CXCL12	-3.4	6	-1.27	0.102	1679	0.991	0.898	15548	0.995
CCNF	-3.4	6	-1.27	0.102	1680	0.991	0.898	15547	0.995
ASIC3	-3.4	6	-1.27	0.102	1681	0.991	0.898	15546	0.995
APBB1	-3.4	6	-1.27	0.102	1682	0.991	0.898	15545	0.995
FBRS	-3.4	6	-1.27	0.102	1683	0.991	0.898	15544	0.995
ANKRD29	-3.4	6	-1.27	0.102	1684	0.991	0.898	15543	0.995
CTTN	-3.39	6	-1.27	0.102	1685	0.991	0.898	15542	0.995
CHDH	-3.39	6	-1.27	0.102	1686	0.991	0.898	15541	0.995
GATA5	-3.39	6	-1.27	0.102	1687	0.991	0.898	15540	0.995
LHFPL4	-3.39	6	-1.27	0.102	1688	0.991	0.898	15539	0.995
SHISA7	-3.39	6	-1.27	0.102	1689	0.991	0.898	15538	0.995
CCNA2	-3.39	6	-1.27	0.102	1690	0.991	0.898	15537	0.995
CREB3L1	-3.39	6	-1.27	0.102	1691	0.991	0.898	15536	0.995
KCTD1	-3.39	6	-1.27	0.102	1692	0.991	0.898	15535	0.995
TMEM194B	-3.09	5	-1.27	0.102	1693	0.991	0.898	15534	0.995
PANK4	-3.38	6	-1.27	0.103	1694	0.991	0.897	15533	0.995
OR51A7	-1.95	2	-1.27	0.103	1695	0.991	0.897	15532	0.995
SEZ6L	-3.38	6	-1.27	0.103	1696	0.991	0.897	15531	0.995
DTX4	-3.38	6	-1.27	0.103	1697	0.991	0.897	15530	0.995
PITX1	-3.38	6	-1.27	0.103	1698	0.991	0.897	15529	0.995
FAM3B	-3.38	6	-1.27	0.103	1699	0.991	0.897	15528	0.995
PVRL4	-3.38	6	-1.26	0.103	1700	0.991	0.897	15527	0.995
PNISR	-3.38	6	-1.26	0.103	1701	0.991	0.897	15526	0.995
TRIM14	-3.38	6	-1.26	0.103	1702	0.991	0.897	15525	0.995
ZC2HC1B	-2.76	4	-1.26	0.103	1703	0.991	0.897	15524	0.995
SERPINF2	-3.38	6	-1.26	0.103	1704	0.991	0.897	15523	0.995
CD1C	-3.38	6	-1.26	0.103	1705	0.991	0.897	15522	0.995
KRT32	-3.38	6	-1.26	0.103	1706	0.991	0.897	15521	0.995
HSPB3	-3.08	5	-1.26	0.103	1707	0.991	0.897	15520	0.995
C1QTNF2	-3.37	6	-1.26	0.103	1708	0.991	0.897	15519	0.995
UBFD1	-1.38	1	-1.26	0.103	1709	0.991	0.897	15518	0.995
DAND5	-3.37	6	-1.26	0.103	1710	0.991	0.897	15517	0.995
MSLNL	-3.37	6	-1.26	0.103	1711	0.991	0.897	15516	0.995
TSPAN9	-3.37	6	-1.26	0.104	1712	0.991	0.896	15515	0.995
MYL3	-1.95	2	-1.26	0.104	1713	0.991	0.896	15514	0.995
C1QL1	-3.08	5	-1.26	0.104	1714	0.991	0.896	15513	0.995
ATR	-3.07	5	-1.26	0.104	1715	0.991	0.896	15512	0.995
PREX2	-3.37	6	-1.26	0.104	1716	0.991	0.896	15511	0.995
OR1N2	-2.75	4	-1.26	0.104	1717	0.991	0.896	15510	0.995
KLHDC10	-3.37	6	-1.26	0.104	1718	0.991	0.896	15509	0.995
C9orf156	-3.37	6	-1.26	0.104	1719	0.991	0.896	15508	0.995
CCDC89	-3.36	6	-1.26	0.104	1720	0.991	0.896	15507	0.995
LYPD3	-3.36	6	-1.26	0.104	1721	0.991	0.896	15506	0.995
CNTF	-3.07	5	-1.26	0.104	1722	0.991	0.896	15505	0.995
C4orf45	-1.37	1	-1.26	0.104	1723	0.991	0.896	15504	0.995
ALOX12	-3.36	6	-1.26	0.104	1724	0.991	0.896	15503	0.995
MARCKSL1	-2.74	4	-1.26	0.104	1725	0.991	0.896	15502	0.995
TGIF2	-3.07	5	-1.26	0.104	1726	0.991	0.896	15501	0.995
CLEC9A	-3.36	6	-1.26	0.104	1727	0.991	0.896	15500	0.995
CEP95	-3.36	6	-1.26	0.104	1728	0.991	0.896	15499	0.995
RTCA	-3.36	6	-1.26	0.105	1729	0.991	0.895	15498	0.995
DLX6	-3.36	6	-1.26	0.105	1730	0.991	0.895	15497	0.995
COL18A1	-3.36	6	-1.26	0.105	1731	0.991	0.895	15496	0.995
CC2D1A	-3.36	6	-1.26	0.105	1732	0.991	0.895	15495	0.995
PDZD7	-3.36	6	-1.26	0.105	1733	0.991	0.895	15494	0.995
ZDHHC6	-2.37	3	-1.25	0.105	1734	0.991	0.895	15493	0.995
HIF3A	-3.35	6	-1.25	0.105	1735	0.991	0.895	15492	0.995
CAMKK2	-3.35	6	-1.25	0.105	1736	0.991	0.895	15491	0.995
GRIK3	-3.35	6	-1.25	0.105	1737	0.991	0.895	15490	0.995
TROVE2	-3.06	5	-1.25	0.105	1738	0.991	0.895	15489	0.995
ZDHHC4	-3.35	6	-1.25	0.105	1739	0.991	0.895	15488	0.995
HDGFL1	-3.35	6	-1.25	0.105	1740	0.991	0.895	15487	0.995
SERPINB1	-3.35	6	-1.25	0.105	1741	0.991	0.895	15486	0.995
SMTN	-3.35	6	-1.25	0.105	1742	0.991	0.895	15485	0.995
NOB1	-2.37	3	-1.25	0.105	1743	0.991	0.895	15484	0.995
SSBP1	-1.37	1	-1.25	0.105	1744	0.991	0.895	15483	0.995
ZNF689	-3.34	6	-1.25	0.106	1745	0.991	0.894	15482	0.995
LRWD1	-3.34	6	-1.25	0.106	1746	0.991	0.894	15481	0.995
ZNF521	-3.34	6	-1.25	0.106	1747	0.991	0.894	15480	0.995
CAMK2N2	-3.34	6	-1.25	0.106	1748	0.991	0.894	15479	0.995
PALM	-3.34	6	-1.25	0.106	1749	0.991	0.894	15478	0.995
PHC2	-3.34	6	-1.25	0.106	1750	0.991	0.894	15477	0.995
LIME1	-3.34	6	-1.25	0.106	1751	0.991	0.894	15476	0.995
NRG4	-2.72	4	-1.25	0.106	1752	0.991	0.894	15475	0.995
TRPV2	-3.34	6	-1.25	0.106	1753	0.991	0.894	15474	0.995
CAPN13	-3.34	6	-1.25	0.106	1754	0.991	0.894	15473	0.995
CCNYL1	-2.36	3	-1.25	0.106	1755	0.991	0.894	15472	0.995
ERLIN1	-3.33	6	-1.25	0.106	1756	0.991	0.894	15471	0.995
TH	-3.33	6	-1.25	0.106	1757	0.991	0.894	15470	0.995
PTGIS	-3.33	6	-1.24	0.107	1758	0.991	0.893	15469	0.995
USP9Y	-3.33	6	-1.24	0.107	1759	0.991	0.893	15468	0.995
C1orf233	-3.04	5	-1.24	0.107	1760	0.991	0.893	15467	0.995
IRX5	-3.32	6	-1.24	0.107	1761	0.991	0.893	15466	0.995
SUPT7L	-3.32	6	-1.24	0.107	1762	0.991	0.893	15465	0.995
PRKAR1B	-3.32	6	-1.24	0.107	1763	0.991	0.893	15464	0.995
PCGF1	-3.32	6	-1.24	0.107	1764	0.991	0.893	15463	0.995
TYMP	-3.32	6	-1.24	0.107	1765	0.991	0.893	15462	0.995
AKT1S1	-3.32	6	-1.24	0.107	1766	0.991	0.893	15461	0.995
RNASE7	-2.35	3	-1.24	0.107	1767	0.991	0.893	15460	0.995
COPB2	-3.32	6	-1.24	0.107	1768	0.991	0.893	15459	0.995
ARHGAP44	-3.32	6	-1.24	0.107	1769	0.991	0.893	15458	0.995
SLC14A1	-3.32	6	-1.24	0.107	1770	0.991	0.893	15457	0.995
ZNF610	-1.92	2	-1.24	0.108	1771	0.991	0.892	15456	0.995
C22orf23	-3.32	6	-1.24	0.108	1772	0.991	0.892	15455	0.995
AMZ2	-1.35	1	-1.24	0.108	1773	0.991	0.892	15454	0.995
FAM198B	-3.32	6	-1.24	0.108	1774	0.991	0.892	15453	0.995
COQ7	-3.31	6	-1.24	0.108	1775	0.991	0.892	15452	0.995
STARD3	-3.31	6	-1.24	0.108	1776	0.991	0.892	15451	0.995
CMYA5	-3.31	6	-1.24	0.108	1777	0.991	0.892	15450	0.995
SLC1A5	-3.31	6	-1.24	0.108	1778	0.991	0.892	15449	0.995
ZHX2	-3.31	6	-1.24	0.108	1779	0.991	0.892	15448	0.995
ZNF460	-3.02	5	-1.24	0.108	1780	0.991	0.892	15447	0.995
MED13L	-3.31	6	-1.24	0.108	1781	0.991	0.892	15446	0.995
EFHC2	-3.31	6	-1.24	0.108	1782	0.991	0.892	15445	0.995
ACVR2A	-3.31	6	-1.24	0.108	1783	0.991	0.892	15444	0.995
NCCRP1	-3.31	6	-1.24	0.108	1784	0.991	0.892	15443	0.995
RABL6	-3.31	6	-1.24	0.108	1785	0.991	0.892	15442	0.995
GH2	-2.34	3	-1.24	0.108	1786	0.991	0.892	15441	0.995
IGSF9	-3.31	6	-1.24	0.108	1787	0.991	0.892	15440	0.995
DUSP10	-3.3	6	-1.23	0.108	1788	0.991	0.892	15439	0.995
HSD17B3	-3.3	6	-1.23	0.109	1789	0.991	0.891	15438	0.995
CTAGE5	-2.69	4	-1.23	0.109	1790	0.991	0.891	15437	0.995
ADPRH	-3.3	6	-1.23	0.109	1791	0.991	0.891	15436	0.995
L3MBTL3	-3.3	6	-1.23	0.109	1792	0.991	0.891	15435	0.995
XKR4	-3.3	6	-1.23	0.109	1793	0.991	0.891	15434	0.995
TMEM249	-3.3	6	-1.23	0.109	1794	0.991	0.891	15433	0.994
UBE4B	-3.3	6	-1.23	0.109	1795	0.991	0.891	15432	0.994
SLTM	-3.3	6	-1.23	0.109	1796	0.991	0.891	15431	0.994
EED	-3.01	5	-1.23	0.109	1797	0.991	0.891	15430	0.994
ZNF260	-1.9	2	-1.23	0.109	1798	0.991	0.891	15429	0.994
MTMR14	-3.29	6	-1.23	0.109	1799	0.991	0.891	15428	0.994
MED13	-3.29	6	-1.23	0.109	1800	0.991	0.891	15427	0.994
AKAP9	-3.29	6	-1.23	0.109	1801	0.991	0.891	15426	0.994
OR1N1	-1.34	1	-1.23	0.109	1802	0.991	0.891	15425	0.994
C1orf27	-2.69	4	-1.23	0.109	1803	0.991	0.891	15424	0.994
TNKS	-3.29	6	-1.23	0.109	1804	0.991	0.891	15423	0.994
MEFV	-3.29	6	-1.23	0.11	1805	0.991	0.89	15422	0.994
FBXW11	-2.68	4	-1.23	0.11	1806	0.991	0.89	15421	0.994
IQSEC2	-3.29	6	-1.23	0.11	1807	0.991	0.89	15420	0.994
LCTL	-3.29	6	-1.23	0.11	1808	0.991	0.89	15419	0.994
NEK4	-3.29	6	-1.23	0.11	1809	0.991	0.89	15418	0.994
OSBP	-3.28	6	-1.23	0.11	1810	0.991	0.89	15417	0.994
ITPR1	-3.28	6	-1.23	0.11	1811	0.991	0.89	15416	0.994
OXER1	-3	5	-1.23	0.11	1812	0.991	0.89	15415	0.994
RAB12	-2.68	4	-1.23	0.11	1813	0.991	0.89	15414	0.994
RMI1	-1.34	1	-1.23	0.11	1814	0.991	0.89	15413	0.994
DNMT3B	-3.28	6	-1.23	0.11	1815	0.991	0.89	15412	0.994
ACHE	-3.28	6	-1.23	0.11	1816	0.991	0.89	15411	0.994
ACOT13	-3	5	-1.23	0.11	1817	0.991	0.89	15410	0.994
PSD4	-3.28	6	-1.23	0.11	1818	0.991	0.89	15409	0.994
COX8A	-2.68	4	-1.22	0.11	1819	0.991	0.89	15408	0.994
RC3H2	-3.28	6	-1.22	0.11	1820	0.991	0.89	15407	0.994
C15orf61	-2.99	5	-1.22	0.11	1821	0.991	0.89	15406	0.994
LRRTM4	-2.99	5	-1.22	0.11	1822	0.991	0.89	15405	0.994
ELAC1	-3.28	6	-1.22	0.11	1823	0.991	0.89	15404	0.994
LDLRAD4	-3.28	6	-1.22	0.11	1824	0.991	0.89	15403	0.994
C1orf172	-3.28	6	-1.22	0.11	1825	0.991	0.89	15402	0.994
PDCD11	-3.28	6	-1.22	0.11	1826	0.991	0.89	15401	0.994
TMEM164	-3.27	6	-1.22	0.111	1827	0.991	0.889	15400	0.994
RNF4	-2.32	3	-1.22	0.111	1828	0.991	0.889	15399	0.994
POLH	-3.27	6	-1.22	0.111	1829	0.991	0.889	15398	0.994
SETBP1	-3.27	6	-1.22	0.111	1830	0.991	0.889	15397	0.994
GMIP	-3.27	6	-1.22	0.111	1831	0.991	0.889	15396	0.994
PLCB3	-3.27	6	-1.22	0.111	1832	0.991	0.889	15395	0.994
TAPBPL	-3.27	6	-1.22	0.111	1833	0.991	0.889	15394	0.994
KCNH5	-3.27	6	-1.22	0.111	1834	0.991	0.889	15393	0.994
APOL1	-2.98	5	-1.22	0.111	1835	0.991	0.889	15392	0.994
MAP3K10	-3.26	6	-1.22	0.111	1836	0.991	0.889	15391	0.994
MAP2	-3.26	6	-1.22	0.111	1837	0.991	0.889	15390	0.994
RAI2	-2.66	4	-1.22	0.111	1838	0.991	0.889	15389	0.994
AGXT2	-3.26	6	-1.22	0.112	1839	0.991	0.888	15388	0.994
SLC22A18	-3.26	6	-1.22	0.112	1840	0.991	0.888	15387	0.994
FNIP1	-3.26	6	-1.22	0.112	1841	0.991	0.888	15386	0.994
KRTAP13-1	-2.31	3	-1.22	0.112	1842	0.991	0.888	15385	0.994
YOD1	-3.26	6	-1.22	0.112	1843	0.991	0.888	15384	0.994
C1QL4	-3.26	6	-1.22	0.112	1844	0.991	0.888	15383	0.994
GCA	-3.26	6	-1.22	0.112	1845	0.991	0.888	15382	0.994
OR11A1	-1.88	2	-1.22	0.112	1846	0.991	0.888	15381	0.994
HIST1H2BA	-1.88	2	-1.22	0.112	1847	0.991	0.888	15380	0.994
GALNTL5	-2.3	3	-1.22	0.112	1848	0.991	0.888	15379	0.994
COPS8	-1.33	1	-1.22	0.112	1849	0.991	0.888	15378	0.994
GYG1	-2.3	3	-1.22	0.112	1850	0.991	0.888	15377	0.994
ZNF7	-3.26	6	-1.22	0.112	1851	0.991	0.888	15376	0.994
C6orf201	-2.97	5	-1.22	0.112	1852	0.991	0.888	15375	0.994
FAM188B	-3.25	6	-1.22	0.112	1853	0.991	0.888	15374	0.994
ASB16	-3.25	6	-1.21	0.112	1854	0.991	0.888	15373	0.994
NDRG3	-2.97	5	-1.21	0.112	1855	0.991	0.888	15372	0.994
NHLRC1	-2.97	5	-1.21	0.112	1856	0.991	0.888	15371	0.994
KLF11	-3.25	6	-1.21	0.113	1857	0.991	0.887	15370	0.994
ASB7	-2.97	5	-1.21	0.113	1858	0.991	0.887	15369	0.994
TOP2B	-3.25	6	-1.21	0.113	1859	0.991	0.887	15368	0.994
ALG13	-3.25	6	-1.21	0.113	1860	0.991	0.887	15367	0.994
UBXN10	-3.25	6	-1.21	0.113	1861	0.991	0.887	15366	0.994
GPD1	-3.25	6	-1.21	0.113	1862	0.991	0.887	15365	0.994
ARHGEF25	-3.24	6	-1.21	0.113	1863	0.991	0.887	15364	0.994
COQ10A	-3.24	6	-1.21	0.113	1864	0.991	0.887	15363	0.994
EGFL7	-3.24	6	-1.21	0.113	1865	0.991	0.887	15362	0.994
SCN4B	-3.24	6	-1.21	0.113	1866	0.991	0.887	15361	0.994
ATP5C1	-1.87	2	-1.21	0.113	1867	0.991	0.887	15360	0.994
PKD1	-3.24	6	-1.21	0.113	1868	0.991	0.887	15359	0.994
NUP133	-3.24	6	-1.21	0.113	1869	0.991	0.887	15358	0.994
RRAS	-3.24	6	-1.21	0.113	1870	0.991	0.887	15357	0.994
FCRL1	-3.24	6	-1.21	0.113	1871	0.991	0.887	15356	0.994
AMPD2	-3.24	6	-1.21	0.113	1872	0.991	0.887	15355	0.994
BIRC7	-3.24	6	-1.21	0.113	1873	0.991	0.887	15354	0.994
C10orf32	-2.29	3	-1.21	0.114	1874	0.991	0.886	15353	0.994
HNF4G	-3.24	6	-1.21	0.114	1875	0.991	0.886	15352	0.994
ACTN3	-3.24	6	-1.21	0.114	1876	0.991	0.886	15351	0.994
WDYHV1	-2.95	5	-1.21	0.114	1877	0.991	0.886	15350	0.994
C8orf58	-3.24	6	-1.21	0.114	1878	0.991	0.886	15349	0.994
AMT	-3.23	6	-1.21	0.114	1879	0.991	0.886	15348	0.994
CHRNA6	-3.23	6	-1.21	0.114	1880	0.991	0.886	15347	0.994
FAM76A	-2.29	3	-1.21	0.114	1881	0.991	0.886	15346	0.994
KIF26B	-3.23	6	-1.21	0.114	1882	0.991	0.886	15345	0.994
CNST	-3.23	6	-1.21	0.114	1883	0.991	0.886	15344	0.994
ZC3H7B	-3.23	6	-1.21	0.114	1884	0.991	0.886	15343	0.994
GRAMD1A	-3.23	6	-1.21	0.114	1885	0.991	0.886	15342	0.994
CHST13	-2.95	5	-1.2	0.114	1886	0.991	0.886	15341	0.994
FIBIN	-3.23	6	-1.2	0.114	1887	0.991	0.886	15340	0.994
AKAP12	-2.95	5	-1.2	0.114	1888	0.991	0.886	15339	0.994
TBC1D10A	-3.23	6	-1.2	0.114	1889	0.991	0.886	15338	0.994
UBN1	-3.23	6	-1.2	0.114	1890	0.991	0.886	15337	0.994
NUTM1	-3.23	6	-1.2	0.114	1891	0.991	0.886	15336	0.994
CHD6	-3.23	6	-1.2	0.114	1892	0.991	0.886	15335	0.994
LDOC1L	-3.22	6	-1.2	0.114	1893	0.991	0.886	15334	0.994
CD244	-3.22	6	-1.2	0.114	1894	0.991	0.886	15333	0.994
RGS22	-3.22	6	-1.2	0.114	1895	0.991	0.886	15332	0.994
MTR	-3.22	6	-1.2	0.115	1896	0.991	0.885	15331	0.994
ARID4A	-2.63	4	-1.2	0.115	1897	0.991	0.885	15330	0.994
MRFAP1	-2.63	4	-1.2	0.115	1898	0.991	0.885	15329	0.994
TNNT1	-3.22	6	-1.2	0.115	1899	0.991	0.885	15328	0.994
PITPNM2	-3.22	6	-1.2	0.115	1900	0.991	0.885	15327	0.994
KCTD16	-3.21	6	-1.2	0.115	1901	0.991	0.885	15326	0.994
ZNF33A	-1.86	2	-1.2	0.115	1902	0.991	0.885	15325	0.994
PRR9	-1.85	2	-1.2	0.115	1903	0.991	0.885	15324	0.994
PHF1	-3.21	6	-1.2	0.115	1904	0.991	0.885	15323	0.994
PLEKHG1	-3.21	6	-1.2	0.115	1905	0.991	0.885	15322	0.994
PTRF	-3.21	6	-1.2	0.115	1906	0.991	0.885	15321	0.994
NUF2	-1.85	2	-1.2	0.115	1907	0.991	0.885	15320	0.994
PARD3B	-3.21	6	-1.2	0.115	1908	0.991	0.885	15319	0.994
TIGD6	-2.93	5	-1.2	0.116	1909	0.991	0.884	15318	0.994
GRPEL2	-2.27	3	-1.2	0.116	1910	0.991	0.884	15317	0.994
SKAP1	-3.21	6	-1.2	0.116	1911	0.991	0.884	15316	0.994
AQP6	-3.21	6	-1.2	0.116	1912	0.991	0.884	15315	0.994
ARHGEF18	-3.21	6	-1.2	0.116	1913	0.991	0.884	15314	0.994
VWC2	-3.21	6	-1.2	0.116	1914	0.991	0.884	15313	0.994
CPO	-2.27	3	-1.2	0.116	1915	0.991	0.884	15312	0.994
CAMK2A	-3.2	6	-1.2	0.116	1916	0.991	0.884	15311	0.994
TMPRSS15	-3.2	6	-1.2	0.116	1917	0.991	0.884	15310	0.994
SIGLEC9	-2.62	4	-1.2	0.116	1918	0.991	0.884	15309	0.994
BARX2	-3.2	6	-1.2	0.116	1919	0.991	0.884	15308	0.994
CCDC68	-2.92	5	-1.19	0.116	1920	0.991	0.884	15307	0.994
ADRA2C	-3.2	6	-1.19	0.116	1921	0.991	0.884	15306	0.994
SF3A2	-3.2	6	-1.19	0.117	1922	0.991	0.883	15305	0.994
MRPL10	-2.92	5	-1.19	0.117	1923	0.991	0.883	15304	0.994
CCDC47	-3.2	6	-1.19	0.117	1924	0.991	0.883	15303	0.994
MICALL2	-3.2	6	-1.19	0.117	1925	0.991	0.883	15302	0.994
DOK4	-3.2	6	-1.19	0.117	1926	0.991	0.883	15301	0.994
FAM46B	-3.2	6	-1.19	0.117	1927	0.991	0.883	15300	0.994
CA4	-3.19	6	-1.19	0.117	1928	0.991	0.883	15299	0.994
SOST	-3.19	6	-1.19	0.117	1929	0.991	0.883	15298	0.994
MEOX1	-2.61	4	-1.19	0.117	1930	0.991	0.883	15297	0.994
TDRD6	-2.91	5	-1.19	0.117	1931	0.991	0.883	15296	0.994
DGKE	-3.19	6	-1.19	0.117	1932	0.991	0.883	15295	0.994
UCP1	-3.19	6	-1.19	0.117	1933	0.991	0.883	15294	0.994
WNT2	-3.19	6	-1.19	0.117	1934	0.991	0.883	15293	0.994
TPD52L3	-2.26	3	-1.19	0.117	1935	0.991	0.883	15292	0.994
KLHL36	-3.19	6	-1.19	0.117	1936	0.991	0.883	15291	0.994
GXYLT1	-2.6	4	-1.19	0.117	1937	0.991	0.883	15290	0.994
C8orf33	-3.19	6	-1.19	0.117	1938	0.991	0.883	15289	0.994
CRYL1	-3.19	6	-1.19	0.117	1939	0.991	0.883	15288	0.994
PARD6G	-3.19	6	-1.19	0.117	1940	0.991	0.883	15287	0.994
FBXW2	-3.18	6	-1.19	0.117	1941	0.991	0.883	15286	0.994
CRYM	-3.18	6	-1.19	0.118	1942	0.991	0.882	15285	0.994
ITGA11	-3.18	6	-1.19	0.118	1943	0.991	0.882	15284	0.994
ZBTB26	-1.84	2	-1.19	0.118	1944	0.991	0.882	15283	0.994
ACOT7	-3.18	6	-1.19	0.118	1945	0.991	0.882	15282	0.994
ZNF598	-3.18	6	-1.19	0.118	1946	0.991	0.882	15281	0.994
SDAD1	-2.6	4	-1.19	0.118	1947	0.991	0.882	15280	0.994
TARS2	-3.18	6	-1.19	0.118	1948	0.991	0.882	15279	0.994
SERPINE1	-3.18	6	-1.19	0.118	1949	0.991	0.882	15278	0.994
IGBP1	-1.84	2	-1.19	0.118	1950	0.991	0.882	15277	0.994
FAM89A	-3.18	6	-1.18	0.118	1951	0.991	0.882	15276	0.994
FAM110A	-3.18	6	-1.18	0.118	1952	0.991	0.882	15275	0.994
C11orf89	-3.18	6	-1.18	0.118	1953	0.991	0.882	15274	0.994
GAB1	-3.17	6	-1.18	0.118	1954	0.991	0.882	15273	0.994
SPATA2	-2.9	5	-1.18	0.118	1955	0.991	0.882	15272	0.994
ZNF211	-3.17	6	-1.18	0.118	1956	0.991	0.882	15271	0.994
F2RL1	-2.24	3	-1.18	0.118	1957	0.991	0.882	15270	0.994
TSPAN2	-2.89	5	-1.18	0.119	1958	0.991	0.881	15269	0.994
SPPL3	-3.17	6	-1.18	0.119	1959	0.991	0.881	15268	0.994
PDE8A	-3.17	6	-1.18	0.119	1960	0.991	0.881	15267	0.994
ERF	-3.17	6	-1.18	0.119	1961	0.991	0.881	15266	0.994
RBP7	-2.24	3	-1.18	0.119	1962	0.991	0.881	15265	0.994
THEMIS	-2.89	5	-1.18	0.119	1963	0.991	0.881	15264	0.994
HTR3B	-3.16	6	-1.18	0.119	1964	0.991	0.881	15263	0.994
ATG3	-3.16	6	-1.18	0.119	1965	0.991	0.881	15262	0.994
RIOK3	-2.89	5	-1.18	0.119	1966	0.991	0.881	15261	0.994
RSAD2	-3.16	6	-1.18	0.119	1967	0.991	0.881	15260	0.994
SIVA1	-3.16	6	-1.18	0.119	1968	0.991	0.881	15259	0.994
GHSR	-3.16	6	-1.18	0.119	1969	0.991	0.881	15258	0.994
ABI1	-3.16	6	-1.18	0.119	1970	0.991	0.881	15257	0.994
BACH2	-3.16	6	-1.18	0.119	1971	0.991	0.881	15256	0.994
DESI1	-3.16	6	-1.18	0.119	1972	0.991	0.881	15255	0.994
DSCR3	-3.16	6	-1.18	0.12	1973	0.991	0.88	15254	0.994
KERA	-3.16	6	-1.18	0.12	1974	0.991	0.88	15253	0.994
SULT2A1	-2.23	3	-1.18	0.12	1975	0.991	0.88	15252	0.994
NAIF1	-3.15	6	-1.18	0.12	1976	0.991	0.88	15251	0.994
MEGF9	-3.15	6	-1.18	0.12	1977	0.991	0.88	15250	0.994
LTB4R2	-3.15	6	-1.18	0.12	1978	0.991	0.88	15249	0.994
DLG5	-3.15	6	-1.17	0.12	1979	0.991	0.88	15248	0.994
EXD2	-3.15	6	-1.17	0.12	1980	0.991	0.88	15247	0.994
TTC24	-3.15	6	-1.17	0.12	1981	0.991	0.88	15246	0.994
APOM	-3.15	6	-1.17	0.12	1982	0.991	0.88	15245	0.994
STRAP	-1.29	1	-1.17	0.12	1983	0.991	0.88	15244	0.994
BBS9	-3.15	6	-1.17	0.12	1984	0.991	0.88	15243	0.994
ACACB	-3.15	6	-1.17	0.12	1985	0.991	0.88	15242	0.994
ARHGEF17	-3.15	6	-1.17	0.12	1986	0.991	0.88	15241	0.994
DHX8	-3.15	6	-1.17	0.121	1987	0.991	0.879	15240	0.994
CLRN1	-2.87	5	-1.17	0.121	1988	0.991	0.879	15239	0.994
BECN1	-2.87	5	-1.17	0.121	1989	0.991	0.879	15238	0.994
LUZP1	-3.14	6	-1.17	0.121	1990	0.991	0.879	15237	0.994
PWP2	-3.14	6	-1.17	0.121	1991	0.991	0.879	15236	0.994
LRRC3B	-2.22	3	-1.17	0.121	1992	0.991	0.879	15235	0.994
SYNJ1	-3.14	6	-1.17	0.121	1993	0.991	0.879	15234	0.994
SLC9A3R1	-3.14	6	-1.17	0.121	1994	0.991	0.879	15233	0.994
THBS3	-3.14	6	-1.17	0.121	1995	0.991	0.879	15232	0.994
CASP7	-3.14	6	-1.17	0.121	1996	0.991	0.879	15231	0.994
LGR6	-3.14	6	-1.17	0.121	1997	0.991	0.879	15230	0.994
NARFL	-3.14	6	-1.17	0.121	1998	0.991	0.879	15229	0.994
PINLYP	-3.14	6	-1.17	0.121	1999	0.991	0.879	15228	0.994
[truncated: 15,227 more rows]

## Sheet: DrugZ T9 R2
GENE	sumZ	numObs	normZ	pval_synth	rank_synth	fdr_synth	pval_supp	rank_supp	fdr_supp
ERCC8	-40.12	6	-15.49	2e-54	1	3.44e-50	1	17223	1
ERCC6	-37.94	6	-14.64	7.48e-49	2	6.44e-45	1	17222	1
UVSSA	-32.55	6	-12.55	1.93e-36	3	1.11e-32	1	17221	1
FANCF	-22.96	5	-9.68	1.83e-22	4	7.87e-19	1	17220	1
ERCC5	-22.63	6	-8.7	1.65e-18	5	5.68e-15	1	17219	1
ADH5	-12.8	2	-8.52	7.87e-18	6	2.26e-14	1	17218	1
CBFB	-21.37	6	-8.21	1.09e-16	7	2.68e-13	1	17217	1
ESD	-16.2	4	-7.62	1.25e-14	8	2.7e-11	1	17216	1
MED16	-18.63	6	-7.15	4.31e-13	9	8.25e-10	1	17215	1
C19orf40	-17.7	6	-6.79	5.66e-12	10	9.36e-09	1	17214	1
FANCA	-17.68	6	-6.78	5.98e-12	11	9.36e-09	1	17213	1
PPP2R4	-15.5	6	-5.93	1.48e-09	12	2.08e-06	1	17212	1
HSD17B12	-12.63	4	-5.92	1.57e-09	13	2.08e-06	1	17211	1
EXO1	-14.77	6	-5.65	7.98e-09	14	9.82e-06	1	17210	1
TGFBR1	-14.27	6	-5.46	2.42e-08	15	2.78e-05	1	17209	1
FANCC	-13.31	6	-5.09	1.82e-07	16	0.000196	1	17208	1
FANCG	-13.17	6	-5.03	2.46e-07	17	0.000249	1	17207	1
PGBD3	-12.97	6	-4.95	3.63e-07	18	0.000347	1	17206	1
VCPIP1	-12.46	6	-4.76	9.86e-07	19	0.000894	1	17205	1
FANCE	-12.14	6	-4.63	1.81e-06	20	0.00156	1	17204	1
ADRB2	-11.83	6	-4.51	3.2e-06	21	0.00263	1	17203	1
GNAS	-11.6	6	-4.42	4.89e-06	22	0.00383	1	17202	1
DAZAP1	-11.43	6	-4.36	6.57e-06	23	0.00492	1	17201	1
C17orf70	-11.33	6	-4.32	7.9e-06	24	0.00542	1	17200	1
MSL3	-11.33	6	-4.32	7.97e-06	25	0.00542	1	17199	1
PTPLA	-8	3	-4.31	8.18e-06	26	0.00542	1	17198	1
RFWD3	-11.2	6	-4.27	9.91e-06	27	0.00632	1	17197	1
ZNF592	-10.46	6	-3.98	3.47e-05	28	0.0213	1	17196	1
CCL18	-7.36	3	-3.96	3.8e-05	29	0.0226	1	17195	1
OR11H6	-7.18	3	-3.86	5.66e-05	30	0.0315	1	17194	1
RAD9A	-10.15	6	-3.86	5.68e-05	31	0.0315	1	17193	1
FOXK1	-10.04	6	-3.82	6.78e-05	32	0.0365	1	17192	1
DR1	-7.95	4	-3.7	0.000108	33	0.0565	1	17191	1
SIVA1	-9.72	6	-3.69	0.000112	34	0.0566	1	17190	1
ACTR5	-9.68	6	-3.68	0.000118	35	0.0583	1	17189	1
C17orf85	-9.59	6	-3.64	0.000136	36	0.0652	1	17188	1
CAND1	-9.42	6	-3.57	0.000175	37	0.0816	1	17187	1
SAMD1	-9.37	6	-3.56	0.000189	38	0.0855	1	17186	1
COPS8	-3.77	1	-3.51	0.000226	39	0.0998	1	17185	1
JMJD6	-9.16	6	-3.48	0.000255	40	0.109	1	17184	1
SUPT3H	-6.47	3	-3.47	0.000259	41	0.109	1	17183	1
NAE1	-9.1	6	-3.45	0.000278	42	0.114	1	17182	1
EMC3	-5.21	2	-3.42	0.000309	43	0.124	1	17181	1
POLE3	-6.37	3	-3.41	0.00032	44	0.125	1	17180	1
STIP1	-8.99	6	-3.41	0.000326	45	0.125	1	17179	1
TFAP4	-8.96	6	-3.4	0.000342	46	0.128	1	17178	1
GORASP1	-8.94	6	-3.39	0.000349	47	0.128	1	17177	1
RAD1	-3.61	1	-3.35	0.000404	48	0.145	1	17176	1
EHMT1	-8.71	6	-3.3	0.000485	49	0.17	1	17175	1
GTF2H5	-3.55	1	-3.29	0.000496	50	0.171	1	17174	1
NBN	-7.06	4	-3.27	0.000531	51	0.178	0.999	17173	1
UXS1	-8.63	6	-3.27	0.000536	52	0.178	0.999	17172	1
TIPRL	-6.94	4	-3.22	0.000644	53	0.209	0.999	17171	1
FOXQ1	-7.67	5	-3.18	0.00073	54	0.233	0.999	17170	1
HUS1	-8.38	6	-3.17	0.00076	55	0.238	0.999	17169	1
SPOP	-8.33	6	-3.15	0.000813	56	0.244	0.999	17168	1
PTBP1	-8.32	6	-3.15	0.000815	57	0.244	0.999	17167	1
FANCI	-8.32	6	-3.15	0.00082	58	0.244	0.999	17166	1
C11orf30	-8.28	6	-3.13	0.00087	59	0.254	0.999	17165	1
CUL5	-8.22	6	-3.11	0.000935	60	0.269	0.999	17164	1
RNF4	-5.76	3	-3.08	0.00103	61	0.292	0.999	17163	1
CELF5	-8.1	6	-3.06	0.00109	62	0.304	0.999	17162	1
NUDCD3	-7.96	6	-3.01	0.0013	63	0.349	0.999	17161	1
WHSC1L1	-7.96	6	-3.01	0.00132	64	0.349	0.999	17160	1
MAPK11	-7.95	6	-3	0.00134	65	0.349	0.999	17159	1
RNF111	-7.94	6	-3	0.00135	66	0.349	0.999	17158	1
CSNK1G2	-7.92	6	-2.99	0.00137	67	0.349	0.999	17157	1
FZD3	-7.92	6	-2.99	0.00138	68	0.349	0.999	17156	1
OTUD5	-7.9	6	-2.99	0.00141	69	0.351	0.999	17155	1
CYB5R4	-5.52	3	-2.95	0.00158	70	0.389	0.998	17154	1
MOB1A	-3.16	1	-2.93	0.00171	71	0.415	0.998	17153	1
NONO	-5.46	3	-2.92	0.00176	72	0.417	0.998	17152	1
CAPSL	-4.46	2	-2.92	0.00177	73	0.417	0.998	17151	1
GPRASP1	-7.04	5	-2.91	0.0018	74	0.419	0.998	17150	1
PPP4R2	-3.14	1	-2.9	0.00184	75	0.423	0.998	17149	1
CCNC	-3.13	1	-2.9	0.00188	76	0.425	0.998	17148	1
PLEC	-7.61	6	-2.87	0.00203	77	0.451	0.998	17147	1
TG	-7.6	6	-2.87	0.00206	78	0.451	0.998	17146	1
DDX42	-7.57	6	-2.86	0.00213	79	0.451	0.998	17145	1
KRT78	-6.17	4	-2.85	0.00216	80	0.451	0.998	17144	1
ZC3H7A	-7.55	6	-2.85	0.00217	81	0.451	0.998	17143	1
NPFFR1	-6.89	5	-2.85	0.00218	82	0.451	0.998	17142	1
TMEM169	-7.54	6	-2.85	0.0022	83	0.451	0.998	17141	1
TCOF1	-7.54	6	-2.85	0.00222	84	0.451	0.998	17140	1
TNFRSF19	-7.54	6	-2.84	0.00222	85	0.451	0.998	17139	1
PDCL	-7.51	6	-2.83	0.00231	86	0.452	0.998	17138	1
DDX39B	-7.5	6	-2.83	0.00232	87	0.452	0.998	17137	1
GLYCTK	-7.49	6	-2.83	0.00235	88	0.452	0.998	17136	1
HIRA	-7.49	6	-2.83	0.00236	89	0.452	0.998	17135	1
ERF	-7.48	6	-2.82	0.00238	90	0.452	0.998	17134	1
BAZ1B	-7.47	6	-2.82	0.0024	91	0.452	0.998	17133	1
ATXN1L	-7.47	6	-2.82	0.00241	92	0.452	0.998	17132	1
ZNF551	-6.08	4	-2.81	0.00248	93	0.46	0.998	17131	1
RNF224	-6.78	5	-2.8	0.00253	94	0.464	0.997	17130	1
TXNDC17	-7.38	6	-2.78	0.00268	95	0.485	0.997	17129	1
CEBPE	-7.37	6	-2.78	0.0027	96	0.485	0.997	17128	1
RBBP8	-7.35	6	-2.77	0.00278	97	0.488	0.997	17127	1
SWI5	-7.35	6	-2.77	0.00278	98	0.488	0.997	17126	1
MCM8	-7.33	6	-2.77	0.00284	99	0.488	0.997	17125	1
GRIN1	-7.33	6	-2.77	0.00284	100	0.488	0.997	17124	1
DRAXIN	-7.33	6	-2.76	0.00286	101	0.488	0.997	17123	1
CHAF1A	-7.27	6	-2.74	0.00307	102	0.512	0.997	17122	1
PHF12	-7.26	6	-2.74	0.00308	103	0.512	0.997	17121	1
ANKRD32	-7.26	6	-2.74	0.00309	104	0.512	0.997	17120	1
ZBTB4	-7.25	6	-2.73	0.00312	105	0.512	0.997	17119	1
NEUROG1	-5.11	3	-2.73	0.0032	106	0.519	0.997	17118	1
ATP6AP1L	-7.21	6	-2.72	0.00327	107	0.521	0.997	17117	1
DEGS1	-6.58	5	-2.72	0.0033	108	0.521	0.997	17116	1
CRH	-5.88	4	-2.71	0.00332	109	0.521	0.997	17115	1
SNRPA	-7.2	6	-2.71	0.00332	110	0.521	0.997	17114	1
ARHGAP8	-7.18	6	-2.71	0.0034	111	0.528	0.997	17113	1
SMYD2	-7.17	6	-2.7	0.00344	112	0.528	0.997	17112	1
HDAC3	-6.47	5	-2.67	0.00381	113	0.581	0.996	17111	1
TMEM9B	-7.04	6	-2.65	0.00402	114	0.605	0.996	17110	1
C17orf53	-7.03	6	-2.65	0.00404	115	0.605	0.996	17109	1
SUZ12	-6.39	5	-2.63	0.00421	116	0.623	0.996	17108	1
FANCB	-6.98	6	-2.63	0.00427	117	0.623	0.996	17107	1
MTMR9	-6.98	6	-2.63	0.00427	118	0.623	0.996	17106	1
CD81	-6.96	6	-2.62	0.00437	119	0.629	0.996	17105	1
SEPT8	-6.96	6	-2.62	0.00438	120	0.629	0.996	17104	1
GNMT	-6.95	6	-2.62	0.00443	121	0.63	0.996	17103	1
POLE4	-6.94	6	-2.61	0.00447	122	0.631	0.996	17102	1
CSN3	-4.9	3	-2.61	0.00457	123	0.637	0.995	17101	1
LRRC45	-6.92	6	-2.6	0.00461	124	0.637	0.995	17100	1
ZNF23	-4.88	3	-2.6	0.00467	125	0.637	0.995	17099	1
FBXW11	-5.64	4	-2.6	0.00468	126	0.637	0.995	17098	1
CWC27	-6.9	6	-2.6	0.0047	127	0.637	0.995	17097	1
TAF15	-6.89	6	-2.59	0.00474	128	0.637	0.995	17096	1
MUS81	-6.89	6	-2.59	0.00477	129	0.637	0.995	17095	1
ADCY5	-6.86	6	-2.58	0.0049	130	0.65	0.995	17094	1
IRX5	-6.8	6	-2.56	0.00527	131	0.693	0.995	17093	1
CYHR1	-6.78	6	-2.55	0.00538	132	0.702	0.995	17092	1
C7orf73	-2.76	1	-2.54	0.00547	133	0.703	0.995	17091	1
BTG2	-6.76	6	-2.54	0.00549	134	0.703	0.995	17090	1
ATM	-6.75	6	-2.54	0.00554	135	0.703	0.994	17089	1
MED13	-6.74	6	-2.54	0.00559	136	0.703	0.994	17088	1
TP53INP1	-6.74	6	-2.53	0.00563	137	0.703	0.994	17087	1
SNRK	-6.74	6	-2.53	0.00563	138	0.703	0.994	17086	1
SLC39A9	-6.73	6	-2.53	0.00569	139	0.706	0.994	17085	1
PARP1	-6.71	6	-2.52	0.00583	140	0.717	0.994	17084	1
ASB7	-6.1	5	-2.51	0.00596	141	0.726	0.994	17083	1
PSME3	-6.68	6	-2.51	0.00598	142	0.726	0.994	17082	1
ZSWIM7	-3.85	2	-2.51	0.0061	143	0.729	0.994	17081	1
YY2	-6.66	6	-2.5	0.00616	144	0.729	0.994	17080	1
ZNF484	-2.71	1	-2.5	0.00619	145	0.729	0.994	17079	1
PLA2R1	-6.65	6	-2.5	0.00622	146	0.729	0.994	17078	1
UBA3	-6.64	6	-2.5	0.00625	147	0.729	0.994	17077	1
A2ML1	-6.63	6	-2.49	0.00632	148	0.729	0.994	17076	1
C19orf80	-6.63	6	-2.49	0.00632	149	0.729	0.994	17075	1
HIST2H2AB	-4.69	3	-2.49	0.00635	150	0.729	0.994	17074	1
IL11	-6.58	6	-2.47	0.00667	151	0.761	0.993	17073	1
MTHFR	-6.57	6	-2.47	0.00675	152	0.761	0.993	17072	1
UBR4	-6.56	6	-2.47	0.0068	153	0.761	0.993	17071	1
STX5	-6.56	6	-2.47	0.00684	154	0.761	0.993	17070	1
VAMP5	-5.35	4	-2.46	0.00693	155	0.761	0.993	17069	1
SEPT4	-6.55	6	-2.46	0.00693	156	0.761	0.993	17068	1
UIMC1	-6.55	6	-2.46	0.00694	157	0.761	0.993	17067	1
MYH6	-6.53	6	-2.46	0.00704	158	0.762	0.993	17066	1
NOLC1	-6.53	6	-2.45	0.00708	159	0.762	0.993	17065	1
TTBK2	-6.52	6	-2.45	0.0071	160	0.762	0.993	17064	1
ACTN3	-6.52	6	-2.45	0.00714	161	0.762	0.993	17063	1
PLEKHA2	-6.51	6	-2.45	0.00718	162	0.762	0.993	17062	1
C16orf72	-6.51	6	-2.45	0.00721	163	0.762	0.993	17061	1
BRIP1	-6.49	6	-2.44	0.0074	164	0.765	0.993	17060	1
EVC	-6.49	6	-2.44	0.00741	165	0.765	0.993	17059	1
DDX21	-6.48	6	-2.44	0.00742	166	0.765	0.993	17058	1
TOMM7	-2.64	1	-2.43	0.00747	167	0.765	0.993	17057	1
KCTD7	-6.47	6	-2.43	0.00754	168	0.765	0.992	17056	1
HK3	-6.47	6	-2.43	0.00755	169	0.765	0.992	17055	1
SLC16A6	-4.57	3	-2.43	0.00757	170	0.765	0.992	17054	1
ANKRD65	-6.46	6	-2.43	0.00759	171	0.765	0.992	17053	1
CABIN1	-6.45	6	-2.42	0.00769	172	0.766	0.992	17052	1
ACHE	-6.45	6	-2.42	0.0077	173	0.766	0.992	17051	1
RHBDF2	-6.44	6	-2.42	0.00775	174	0.766	0.992	17050	1
BTBD10	-5.87	5	-2.42	0.00782	175	0.766	0.992	17049	1
GMDS	-6.43	6	-2.42	0.00783	176	0.766	0.992	17048	1
GCG	-6.42	6	-2.41	0.00794	177	0.773	0.992	17047	1
IGFLR1	-6.41	6	-2.41	0.00804	178	0.778	0.992	17046	1
CCDC179	-2.61	1	-2.4	0.00823	179	0.791	0.992	17045	1
KAT5	-5.82	5	-2.39	0.00835	180	0.797	0.992	17044	1
GP6	-6.37	6	-2.39	0.00838	181	0.797	0.992	17043	1
SON	-6.36	6	-2.39	0.00849	182	0.803	0.992	17042	1
CD33	-5.79	5	-2.38	0.00864	183	0.805	0.991	17041	1
RPRD1B	-6.34	6	-2.38	0.00864	184	0.805	0.991	17040	1
LIN7C	-5.79	5	-2.38	0.00865	185	0.805	0.991	17039	1
SLC11A1	-6.32	6	-2.37	0.00881	186	0.816	0.991	17038	1
ST8SIA5	-6.31	6	-2.37	0.0089	187	0.82	0.991	17037	1
FAN1	-6.3	6	-2.36	0.00905	188	0.829	0.991	17036	1
PPAP2B	-6.29	6	-2.36	0.00914	189	0.833	0.991	17035	1
DIRAS1	-4.44	3	-2.36	0.00923	190	0.835	0.991	17034	1
SF1	-6.27	6	-2.35	0.00926	191	0.835	0.991	17033	1
SLX4	-6.25	6	-2.35	0.00945	192	0.841	0.991	17032	1
EXOC3L4	-6.25	6	-2.35	0.00949	193	0.841	0.991	17031	1
DCAF4	-6.25	6	-2.34	0.00954	194	0.841	0.99	17030	1
ELOVL6	-5.7	5	-2.34	0.00956	195	0.841	0.99	17029	1
RIBC1	-6.24	6	-2.34	0.00957	196	0.841	0.99	17028	1
MED28	-5.09	4	-2.34	0.00968	197	0.846	0.99	17027	1
SLC4A10	-6.23	6	-2.34	0.00973	198	0.847	0.99	17026	1
VPRBP	-5.08	4	-2.33	0.00981	199	0.848	0.99	17025	1
CERS6	-6.22	6	-2.33	0.00984	200	0.848	0.99	17024	1
ZNF367	-6.21	6	-2.33	0.00994	201	0.85	0.99	17023	1
SCNM1	-6.2	6	-2.33	0.00996	202	0.85	0.99	17022	1
AGR2	-4.38	3	-2.32	0.0101	203	0.855	0.99	17021	1
ANAPC15	-6.18	6	-2.32	0.0102	204	0.86	0.99	17020	1
NHP2	-2.52	1	-2.31	0.0104	205	0.868	0.99	17019	1
PLEKHA1	-6.16	6	-2.31	0.0104	206	0.868	0.99	17018	1
WDR54	-6.16	6	-2.31	0.0105	207	0.871	0.99	17017	1
HDAC8	-6.15	6	-2.31	0.0106	208	0.875	0.989	17016	1
P2RX2	-6.14	6	-2.3	0.0106	209	0.875	0.989	17015	1
LMBR1	-5.6	5	-2.3	0.0107	210	0.876	0.989	17014	1
LHPP	-6.13	6	-2.3	0.0108	211	0.881	0.989	17013	1
GUCY1B3	-6.12	6	-2.3	0.0109	212	0.881	0.989	17012	1
SPANXD	-2.5	1	-2.29	0.0109	213	0.881	0.989	17011	1
KLF2	-6.11	6	-2.29	0.011	214	0.881	0.989	17010	1
UFSP2	-6.11	6	-2.29	0.011	215	0.881	0.989	17009	1
MMP11	-6.1	6	-2.29	0.0111	216	0.881	0.989	17008	1
GPSM1	-6.09	6	-2.28	0.0112	217	0.881	0.989	17007	1
BLOC1S2	-2.49	1	-2.28	0.0112	218	0.881	0.989	17006	1
GTPBP2	-6.08	6	-2.28	0.0113	219	0.881	0.989	17005	1
TK1	-6.08	6	-2.28	0.0113	220	0.881	0.989	17004	1
EPHA10	-6.08	6	-2.28	0.0113	221	0.881	0.989	17003	1
CRELD2	-6.08	6	-2.28	0.0114	222	0.881	0.989	17002	1
IQCF1	-4.28	3	-2.27	0.0116	223	0.888	0.988	17001	1
PSMG1	-5.53	5	-2.27	0.0116	224	0.888	0.988	17000	1
EMC8	-6.05	6	-2.27	0.0117	225	0.888	0.988	16999	1
CCDC103	-6.05	6	-2.27	0.0117	226	0.888	0.988	16998	1
UNC93A	-6.04	6	-2.27	0.0117	227	0.888	0.988	16997	1
PAN3	-6.04	6	-2.27	0.0118	228	0.888	0.988	16996	1
GFER	-6.04	6	-2.26	0.0118	229	0.889	0.988	16995	1
EED	-5.5	5	-2.26	0.0119	230	0.892	0.988	16994	1
CHKB	-6.02	6	-2.25	0.0121	231	0.892	0.988	16993	1
SAP30BP	-6.01	6	-2.25	0.0121	232	0.892	0.988	16992	1
MDN1	-4.91	4	-2.25	0.0121	233	0.892	0.988	16991	1
ZNF641	-6.01	6	-2.25	0.0121	234	0.892	0.988	16990	1
ANKRD37	-5.48	5	-2.25	0.0122	235	0.892	0.988	16989	1
GDF7	-6	6	-2.25	0.0123	236	0.898	0.988	16988	1
TTC21B	-5.99	6	-2.24	0.0124	237	0.9	0.988	16987	1
MED25	-5.99	6	-2.24	0.0124	238	0.9	0.988	16986	1
SETD1A	-5.97	6	-2.24	0.0127	239	0.901	0.987	16985	1
PRKACA	-5.97	6	-2.24	0.0127	240	0.901	0.987	16984	1
LRRC26	-5.96	6	-2.23	0.0127	241	0.901	0.987	16983	1
ACOX1	-5.96	6	-2.23	0.0127	242	0.901	0.987	16982	1
MFAP1	-5.96	6	-2.23	0.0127	243	0.901	0.987	16981	1
IL17D	-5.44	5	-2.23	0.0128	244	0.901	0.987	16980	1
PHC3	-5.96	6	-2.23	0.0128	245	0.903	0.987	16979	1
RAB40C	-5.94	6	-2.23	0.013	246	0.907	0.987	16978	1
RSPH9	-5.94	6	-2.23	0.013	247	0.907	0.987	16977	1
SOX17	-5.42	5	-2.22	0.0131	248	0.907	0.987	16976	1
TOP3B	-5.93	6	-2.22	0.0131	249	0.907	0.987	16975	1
VDAC2	-2.42	1	-2.22	0.0132	250	0.909	0.987	16974	1
CCDC168	-5.41	5	-2.22	0.0132	251	0.909	0.987	16973	1
POLD3	-5.92	6	-2.22	0.0133	252	0.912	0.987	16972	1
WDR48	-5.91	6	-2.21	0.0134	253	0.913	0.987	16971	1
LY6G6F	-5.9	6	-2.21	0.0135	254	0.917	0.986	16970	1
CDH4	-5.89	6	-2.21	0.0136	255	0.917	0.986	16969	1
TGFBR2	-5.89	6	-2.21	0.0137	256	0.917	0.986	16968	1
NDST4	-5.89	6	-2.21	0.0137	257	0.917	0.986	16967	1
SH3RF2	-5.88	6	-2.2	0.0138	258	0.917	0.986	16966	1
DCPS	-5.88	6	-2.2	0.0139	259	0.917	0.986	16965	1
PNLIPRP1	-5.87	6	-2.2	0.0139	260	0.917	0.986	16964	1
SNTB2	-5.87	6	-2.2	0.014	261	0.917	0.986	16963	1
INHBA	-5.86	6	-2.2	0.0141	262	0.917	0.986	16962	1
AMBRA1	-5.86	6	-2.2	0.0141	263	0.917	0.986	16961	1
RGS16	-5.35	5	-2.19	0.0141	264	0.917	0.986	16960	1
CDKN1C	-5.86	6	-2.19	0.0142	265	0.917	0.986	16959	1
USP37	-5.34	5	-2.19	0.0142	266	0.917	0.986	16958	1
LY75	-5.85	6	-2.19	0.0142	267	0.917	0.986	16957	1
GIMAP8	-5.85	6	-2.19	0.0143	268	0.917	0.986	16956	1
PAIP1	-5.33	5	-2.18	0.0145	269	0.923	0.986	16955	1
FBXO6	-5.83	6	-2.18	0.0145	270	0.923	0.986	16954	1
FBXO28	-5.83	6	-2.18	0.0146	271	0.927	0.985	16953	1
SLC29A1	-5.82	6	-2.18	0.0147	272	0.934	0.985	16952	1
XRCC3	-5.81	6	-2.17	0.0148	273	0.936	0.985	16951	1
CMTM7	-5.8	6	-2.17	0.015	274	0.939	0.985	16950	1
ETS2	-5.8	6	-2.17	0.015	275	0.939	0.985	16949	1
LCLAT1	-5.79	6	-2.17	0.015	276	0.939	0.985	16948	1
EAF1	-5.79	6	-2.17	0.0151	277	0.939	0.985	16947	1
CNOT6	-5.78	6	-2.16	0.0153	278	0.939	0.985	16946	1
SEPT6	-5.77	6	-2.16	0.0154	279	0.939	0.985	16945	1
RECQL5	-5.77	6	-2.16	0.0154	280	0.939	0.985	16944	1
CCDC14	-5.77	6	-2.16	0.0154	281	0.939	0.985	16943	1
GMEB1	-5.77	6	-2.16	0.0155	282	0.939	0.985	16942	1
UBE2Q1	-5.77	6	-2.16	0.0155	283	0.939	0.985	16941	1
COL1A1	-5.75	6	-2.15	0.0157	284	0.939	0.984	16940	1
PPARD	-5.75	6	-2.15	0.0157	285	0.939	0.984	16939	1
ASIC4	-5.75	6	-2.15	0.0158	286	0.939	0.984	16938	1
ABCC1	-5.74	6	-2.15	0.0159	287	0.939	0.984	16937	1
PRSS33	-5.73	6	-2.14	0.016	288	0.939	0.984	16936	1
SYNGR2	-4.68	4	-2.14	0.016	289	0.939	0.984	16935	1
SFMBT1	-5.73	6	-2.14	0.0161	290	0.939	0.984	16934	1
CTNNB1	-5.72	6	-2.14	0.0162	291	0.939	0.984	16933	1
ZDHHC16	-5.72	6	-2.14	0.0162	292	0.939	0.984	16932	1
C1orf51	-5.71	6	-2.14	0.0163	293	0.939	0.984	16931	1
DDX5	-5.71	6	-2.14	0.0163	294	0.939	0.984	16930	1
CTXN1	-4.03	3	-2.13	0.0164	295	0.939	0.984	16929	1
ARIH2	-4.65	4	-2.13	0.0165	296	0.939	0.984	16928	1
NR0B2	-5.7	6	-2.13	0.0165	297	0.939	0.984	16927	1
PPP1R16A	-5.7	6	-2.13	0.0165	298	0.939	0.983	16926	1
ZNF317	-5.7	6	-2.13	0.0165	299	0.939	0.983	16925	1
APITD1	-3.29	2	-2.13	0.0166	300	0.939	0.983	16924	1
ABCA9	-5.69	6	-2.13	0.0166	301	0.939	0.983	16923	1
GPR148	-4.65	4	-2.13	0.0166	302	0.939	0.983	16922	1
FKBP15	-5.69	6	-2.13	0.0166	303	0.939	0.983	16921	1
FNDC1	-5.69	6	-2.13	0.0167	304	0.939	0.983	16920	1
TACR2	-5.69	6	-2.13	0.0167	305	0.939	0.983	16919	1
TMEM51	-5.69	6	-2.13	0.0167	306	0.939	0.983	16918	1
ASNSD1	-5.68	6	-2.13	0.0167	307	0.939	0.983	16917	1
TMEM229A	-5.68	6	-2.12	0.0169	308	0.943	0.983	16916	1
PDZD11	-2.31	1	-2.12	0.017	309	0.947	0.983	16915	1
TRIP12	-5.67	6	-2.12	0.017	310	0.947	0.983	16914	1
USP42	-5.66	6	-2.12	0.0171	311	0.948	0.983	16913	1
NDUFAF1	-2.31	1	-2.12	0.0172	312	0.949	0.983	16912	1
ZNF18	-5.65	6	-2.11	0.0173	313	0.952	0.983	16911	1
PIGL	-5.65	6	-2.11	0.0174	314	0.952	0.983	16910	1
NAGLU	-5.64	6	-2.11	0.0175	315	0.955	0.983	16909	1
NAA60	-5.64	6	-2.11	0.0176	316	0.957	0.982	16908	1
SEL1L3	-5.63	6	-2.11	0.0176	317	0.958	0.982	16907	1
ASGR1	-5.62	6	-2.1	0.0179	318	0.966	0.982	16906	1
DYRK4	-5.61	6	-2.1	0.0179	319	0.966	0.982	16905	1
ALCAM	-5.61	6	-2.1	0.018	320	0.966	0.982	16904	1
RBFOX3	-5.6	6	-2.1	0.0181	321	0.97	0.982	16903	1
FGF23	-5.6	6	-2.09	0.0182	322	0.971	0.982	16902	1
DCC	-5.59	6	-2.09	0.0183	323	0.971	0.982	16901	1
SMARCAL1	-5.59	6	-2.09	0.0183	324	0.971	0.982	16900	1
NR2F2	-5.59	6	-2.09	0.0184	325	0.971	0.982	16899	1
ARMCX1	-4.56	4	-2.09	0.0185	326	0.971	0.982	16898	1
TMEM120B	-5.58	6	-2.09	0.0185	327	0.971	0.982	16897	1
TRAM1	-3.22	2	-2.09	0.0185	328	0.971	0.981	16896	1
STK35	-5.57	6	-2.08	0.0186	329	0.974	0.981	16895	1
NFYA	-5.57	6	-2.08	0.0187	330	0.975	0.981	16894	1
GABRA3	-5.57	6	-2.08	0.0188	331	0.977	0.981	16893	1
PKMYT1	-5.55	6	-2.07	0.019	332	0.978	0.981	16892	1
C8orf31	-5.55	6	-2.07	0.0191	333	0.978	0.981	16891	1
DDX39A	-5.52	6	-2.06	0.0195	334	0.978	0.98	16890	1
ERCC1	-5.52	6	-2.06	0.0196	335	0.978	0.98	16889	1
SP6	-5.04	5	-2.06	0.0196	336	0.978	0.98	16888	1
LPAR3	-5.52	6	-2.06	0.0197	337	0.978	0.98	16887	1
TM4SF5	-5.51	6	-2.06	0.0197	338	0.978	0.98	16886	1
PPME1	-5.5	6	-2.06	0.0199	339	0.978	0.98	16885	1
PCBP1	-5.5	6	-2.06	0.0199	340	0.978	0.98	16884	1
RAD54L	-5.5	6	-2.05	0.02	341	0.978	0.98	16883	1
GNA13	-5.49	6	-2.05	0.0201	342	0.978	0.98	16882	1
VAV3	-5.49	6	-2.05	0.0201	343	0.978	0.98	16881	1
FANCM	-5.49	6	-2.05	0.0202	344	0.978	0.98	16880	1
BBX	-5.49	6	-2.05	0.0202	345	0.978	0.98	16879	1
KIAA1328	-5.49	6	-2.05	0.0202	346	0.978	0.98	16878	1
SENP8	-4.47	4	-2.05	0.0204	347	0.978	0.98	16877	1
NOS3	-5.47	6	-2.04	0.0205	348	0.978	0.979	16876	1
PAXBP1	-4.98	5	-2.04	0.0208	349	0.978	0.979	16875	0.999
ACVR2A	-5.46	6	-2.04	0.0208	350	0.978	0.979	16874	0.999
AURKB	-4.98	5	-2.04	0.0208	351	0.978	0.979	16873	0.999
ANKRD39	-5.45	6	-2.04	0.0209	352	0.978	0.979	16872	0.999
RPS29	-2.22	1	-2.03	0.0209	353	0.978	0.979	16871	0.999
PAN2	-5.45	6	-2.03	0.021	354	0.978	0.979	16870	0.999
OR6J1	-4.45	4	-2.03	0.021	355	0.978	0.979	16869	0.999
C2orf48	-5.44	6	-2.03	0.0211	356	0.978	0.979	16868	0.999
EHMT2	-5.44	6	-2.03	0.0211	357	0.978	0.979	16867	0.999
NAV2	-5.44	6	-2.03	0.0211	358	0.978	0.979	16866	0.999
DNASE1	-5.44	6	-2.03	0.0211	359	0.978	0.979	16865	0.999
SUV420H2	-5.43	6	-2.03	0.0213	360	0.978	0.979	16864	0.999
WRN	-5.42	6	-2.03	0.0214	361	0.978	0.979	16863	0.999
ZMYM4	-5.42	6	-2.02	0.0215	362	0.978	0.978	16862	0.999
STK19	-5.41	6	-2.02	0.0217	363	0.978	0.978	16861	0.999
ASPHD1	-4.94	5	-2.02	0.0217	364	0.978	0.978	16860	0.999
RBMX2	-3.12	2	-2.02	0.0218	365	0.978	0.978	16859	0.999
TACC3	-5.4	6	-2.02	0.0219	366	0.978	0.978	16858	0.999
CLK3	-5.4	6	-2.01	0.022	367	0.978	0.978	16857	0.999
CCDC27	-5.4	6	-2.01	0.022	368	0.978	0.978	16856	0.999
SMAD3	-5.39	6	-2.01	0.022	369	0.978	0.978	16855	0.999
TNRC18	-5.39	6	-2.01	0.0221	370	0.978	0.978	16854	0.999
ANG	-3.81	3	-2.01	0.0221	371	0.978	0.978	16853	0.999
MED30	-3.81	3	-2.01	0.0222	372	0.978	0.978	16852	0.999
CHTF18	-5.38	6	-2.01	0.0223	373	0.978	0.978	16851	0.999
FAM221A	-5.38	6	-2.01	0.0223	374	0.978	0.978	16850	0.999
NKPD1	-5.37	6	-2	0.0225	375	0.978	0.977	16849	0.999
UBN1	-5.37	6	-2	0.0226	376	0.978	0.977	16848	0.999
TEX33	-5.37	6	-2	0.0226	377	0.978	0.977	16847	0.999
FAM129A	-5.36	6	-2	0.0228	378	0.978	0.977	16846	0.999
KNSTRN	-5.35	6	-2	0.023	379	0.978	0.977	16845	0.999
RBM25	-4.88	5	-1.99	0.023	380	0.978	0.977	16844	0.999
PDDC1	-5.35	6	-1.99	0.0231	381	0.978	0.977	16843	0.999
DNAJC21	-5.34	6	-1.99	0.0231	382	0.978	0.977	16842	0.999
DMRT1	-5.34	6	-1.99	0.0232	383	0.978	0.977	16841	0.999
ANKS1A	-5.33	6	-1.99	0.0234	384	0.978	0.977	16840	0.999
AUNIP	-4.87	5	-1.99	0.0234	385	0.978	0.977	16839	0.999
RXRA	-5.32	6	-1.99	0.0235	386	0.978	0.976	16838	0.999
NOL7	-5.32	6	-1.99	0.0235	387	0.978	0.976	16837	0.999
ZSCAN31	-4.34	4	-1.98	0.0236	388	0.978	0.976	16836	0.999
RAD21	-3.07	2	-1.98	0.0236	389	0.978	0.976	16835	0.999
CDC42BPG	-5.32	6	-1.98	0.0236	390	0.978	0.976	16834	0.999
MCM9	-5.32	6	-1.98	0.0236	391	0.978	0.976	16833	0.999
MFAP2	-5.31	6	-1.98	0.0237	392	0.978	0.976	16832	0.999
GPR161	-5.31	6	-1.98	0.0238	393	0.978	0.976	16831	0.999
STAU1	-5.31	6	-1.98	0.0239	394	0.978	0.976	16830	0.999
STAU2	-3.75	3	-1.98	0.0239	395	0.978	0.976	16829	0.999
TAPT1	-5.31	6	-1.98	0.0239	396	0.978	0.976	16828	0.999
NAGS	-5.3	6	-1.98	0.0239	397	0.978	0.976	16827	0.999
CEP192	-5.3	6	-1.98	0.0241	398	0.978	0.976	16826	0.999
KIRREL	-5.29	6	-1.97	0.0241	399	0.978	0.976	16825	0.999
SUPT20H	-5.29	6	-1.97	0.0242	400	0.978	0.976	16824	0.999
UBE2O	-5.29	6	-1.97	0.0243	401	0.978	0.976	16823	0.999
ETAA1	-3.05	2	-1.97	0.0245	402	0.978	0.975	16822	0.999
HELT	-5.27	6	-1.97	0.0246	403	0.978	0.975	16821	0.999
ENO4	-5.27	6	-1.97	0.0247	404	0.978	0.975	16820	0.999
OR7C1	-3.72	3	-1.96	0.0249	405	0.978	0.975	16819	0.999
TMCC3	-5.26	6	-1.96	0.0249	406	0.978	0.975	16818	0.999
NUP133	-5.26	6	-1.96	0.0249	407	0.978	0.975	16817	0.999
QSOX1	-5.26	6	-1.96	0.025	408	0.978	0.975	16816	0.999
CECR6	-4.8	5	-1.96	0.025	409	0.978	0.975	16815	0.999
SEC22A	-4.8	5	-1.96	0.025	410	0.978	0.975	16814	0.999
CACNB3	-5.25	6	-1.96	0.0251	411	0.978	0.975	16813	0.999
TECTA	-5.25	6	-1.96	0.0251	412	0.978	0.975	16812	0.999
RILPL2	-4.79	5	-1.96	0.0251	413	0.978	0.975	16811	0.999
ZNF284	-2.14	1	-1.96	0.0252	414	0.978	0.975	16810	0.999
CELF2	-5.25	6	-1.96	0.0252	415	0.978	0.975	16809	0.999
LRRC43	-5.25	6	-1.96	0.0253	416	0.978	0.975	16808	0.999
TEX35	-5.24	6	-1.95	0.0254	417	0.978	0.975	16807	0.999
CLCN6	-5.23	6	-1.95	0.0256	418	0.978	0.974	16806	0.999
MAPRE1	-2.13	1	-1.95	0.0257	419	0.978	0.974	16805	0.999
SPICE1	-5.23	6	-1.95	0.0257	420	0.978	0.974	16804	0.999
HOXA1	-5.22	6	-1.95	0.0258	421	0.978	0.974	16803	0.999
RLTPR	-5.22	6	-1.95	0.0258	422	0.978	0.974	16802	0.999
TRIM16	-3.69	3	-1.95	0.0258	423	0.978	0.974	16801	0.999
KLHL35	-5.22	6	-1.94	0.0259	424	0.978	0.974	16800	0.999
AHCYL2	-5.21	6	-1.94	0.0261	425	0.978	0.974	16799	0.999
RTN4RL1	-5.21	6	-1.94	0.0261	426	0.978	0.974	16798	0.999
KLHL2	-5.2	6	-1.94	0.0263	427	0.978	0.974	16797	0.998
PSPC1	-5.2	6	-1.94	0.0263	428	0.978	0.974	16796	0.998
CENPI	-5.2	6	-1.94	0.0263	429	0.978	0.974	16795	0.998
GEN1	-4.24	4	-1.94	0.0265	430	0.978	0.974	16794	0.998
L3MBTL3	-5.19	6	-1.93	0.0265	431	0.978	0.973	16793	0.998
SLC35D3	-5.18	6	-1.93	0.0267	432	0.978	0.973	16792	0.998
OPRL1	-5.18	6	-1.93	0.0268	433	0.978	0.973	16791	0.998
SLCO1C1	-5.18	6	-1.93	0.0268	434	0.978	0.973	16790	0.998
NUDC	-3.66	3	-1.93	0.027	435	0.978	0.973	16789	0.998
KRT79	-5.17	6	-1.93	0.027	436	0.978	0.973	16788	0.998
HNRNPH1	-4.22	4	-1.92	0.0272	437	0.978	0.973	16787	0.998
RRP36	-5.16	6	-1.92	0.0273	438	0.978	0.973	16786	0.998
SPAG5	-5.16	6	-1.92	0.0273	439	0.978	0.973	16785	0.998
SRMS	-5.15	6	-1.92	0.0274	440	0.978	0.973	16784	0.998
ELFN2	-4.7	5	-1.92	0.0274	441	0.978	0.973	16783	0.998
KCTD18	-5.15	6	-1.92	0.0274	442	0.978	0.973	16782	0.998
PRSS8	-5.15	6	-1.92	0.0275	443	0.978	0.973	16781	0.998
ABCC3	-5.15	6	-1.92	0.0276	444	0.978	0.972	16780	0.998
MED12	-5.15	6	-1.92	0.0276	445	0.978	0.972	16779	0.998
GOLGA3	-5.15	6	-1.92	0.0276	446	0.978	0.972	16778	0.998
GRB14	-5.15	6	-1.92	0.0276	447	0.978	0.972	16777	0.998
ZNF865	-4.69	5	-1.91	0.0278	448	0.978	0.972	16776	0.998
SPHKAP	-5.14	6	-1.91	0.0278	449	0.978	0.972	16775	0.998
AGPS	-5.14	6	-1.91	0.0278	450	0.978	0.972	16774	0.998
LHX2	-5.14	6	-1.91	0.0279	451	0.978	0.972	16773	0.998
CCDC12	-5.13	6	-1.91	0.028	452	0.978	0.972	16772	0.998
SLC1A6	-5.13	6	-1.91	0.028	453	0.978	0.972	16771	0.998
GGA1	-5.12	6	-1.91	0.0282	454	0.978	0.972	16770	0.998
ZNF410	-5.12	6	-1.91	0.0284	455	0.978	0.972	16769	0.998
FOXR1	-5.11	6	-1.9	0.0284	456	0.978	0.972	16768	0.998
ADRA2C	-5.11	6	-1.9	0.0286	457	0.978	0.971	16767	0.998
GCA	-5.11	6	-1.9	0.0286	458	0.978	0.971	16766	0.998
ZNF774	-5.1	6	-1.9	0.0287	459	0.978	0.971	16765	0.998
LRRC14B	-5.1	6	-1.9	0.0288	460	0.978	0.971	16764	0.998
DIP2C	-5.09	6	-1.9	0.0289	461	0.978	0.971	16763	0.998
KCNK3	-5.09	6	-1.89	0.0291	462	0.978	0.971	16762	0.998
TBC1D7	-4.14	4	-1.89	0.0295	463	0.978	0.971	16761	0.997
CDK5	-4.63	5	-1.89	0.0296	464	0.978	0.97	16760	0.997
BAIAP2	-5.07	6	-1.89	0.0296	465	0.978	0.97	16759	0.997
ARSF	-5.07	6	-1.89	0.0296	466	0.978	0.97	16758	0.997
ITIH6	-5.06	6	-1.88	0.0298	467	0.978	0.97	16757	0.997
EIF2D	-5.06	6	-1.88	0.0298	468	0.978	0.97	16756	0.997
OR5AU1	-4.62	5	-1.88	0.0299	469	0.978	0.97	16755	0.997
HRC	-5.05	6	-1.88	0.03	470	0.978	0.97	16754	0.997
SEC11A	-2.06	1	-1.88	0.0301	471	0.978	0.97	16753	0.997
GJD3	-5.05	6	-1.88	0.0301	472	0.978	0.97	16752	0.997
AP2S1	-5.04	6	-1.88	0.0302	473	0.978	0.97	16751	0.997
PLS1	-5.04	6	-1.88	0.0303	474	0.978	0.97	16750	0.997
TSPO2	-5.04	6	-1.88	0.0303	475	0.978	0.97	16749	0.997
CIC	-5.04	6	-1.88	0.0303	476	0.978	0.97	16748	0.997
VPS26B	-5.04	6	-1.87	0.0304	477	0.978	0.97	16747	0.997
SLAIN2	-5.04	6	-1.87	0.0304	478	0.978	0.97	16746	0.997
POLR1E	-5.03	6	-1.87	0.0305	479	0.978	0.969	16745	0.997
DENND4A	-5.03	6	-1.87	0.0306	480	0.978	0.969	16744	0.997
FAM3A	-5.03	6	-1.87	0.0307	481	0.978	0.969	16743	0.997
DIABLO	-5.03	6	-1.87	0.0307	482	0.978	0.969	16742	0.997
TAS1R1	-5.02	6	-1.87	0.0307	483	0.978	0.969	16741	0.997
KLHL6	-5.02	6	-1.87	0.0308	484	0.978	0.969	16740	0.997
NSUN5	-5.02	6	-1.87	0.0308	485	0.978	0.969	16739	0.997
TIMP4	-5.02	6	-1.87	0.031	486	0.978	0.969	16738	0.997
MAPK8	-5.01	6	-1.87	0.031	487	0.978	0.969	16737	0.997
ZFP37	-5.01	6	-1.86	0.0311	488	0.978	0.969	16736	0.997
ABHD17A	-2.89	2	-1.86	0.0311	489	0.978	0.969	16735	0.997
MAD2L2	-5.01	6	-1.86	0.0312	490	0.978	0.969	16734	0.997
MARCH9	-5	6	-1.86	0.0313	491	0.978	0.969	16733	0.997
PVRL3	-5	6	-1.86	0.0313	492	0.978	0.969	16732	0.997
MAPK8IP1	-5	6	-1.86	0.0314	493	0.978	0.969	16731	0.997
DEFB118	-2.88	2	-1.86	0.0315	494	0.978	0.968	16730	0.997
FANCD2	-4.99	6	-1.86	0.0316	495	0.978	0.968	16729	0.997
DHX8	-4.99	6	-1.86	0.0316	496	0.978	0.968	16728	0.997
C10orf71	-4.99	6	-1.86	0.0316	497	0.978	0.968	16727	0.997
RNLS	-4.99	6	-1.86	0.0317	498	0.978	0.968	16726	0.997
MGAT2	-4.07	4	-1.86	0.0318	499	0.978	0.968	16725	0.997
SH2B1	-4.99	6	-1.85	0.0318	500	0.978	0.968	16724	0.997
CARKD	-4.98	6	-1.85	0.0318	501	0.978	0.968	16723	0.997
WDR83	-4.98	6	-1.85	0.032	502	0.978	0.968	16722	0.997
GREM1	-4.06	4	-1.85	0.032	503	0.978	0.968	16721	0.997
MED23	-4.97	6	-1.85	0.0322	504	0.978	0.968	16720	0.997
CEACAM5	-4.06	4	-1.85	0.0322	505	0.978	0.968	16719	0.997
TNFSF14	-4.96	6	-1.85	0.0324	506	0.978	0.968	16718	0.997
PDZK1IP1	-4.96	6	-1.85	0.0324	507	0.978	0.968	16717	0.997
RBAK	-4.96	6	-1.85	0.0324	508	0.978	0.968	16716	0.997
NSUN7	-4.96	6	-1.85	0.0325	509	0.978	0.968	16715	0.997
CAPZA1	-2.03	1	-1.85	0.0325	510	0.978	0.968	16714	0.997
DPY19L1	-2.86	2	-1.84	0.0325	511	0.978	0.967	16713	0.997
SLC15A2	-4.96	6	-1.84	0.0326	512	0.978	0.967	16712	0.997
FRYL	-4.96	6	-1.84	0.0326	513	0.978	0.967	16711	0.997
EPN3	-4.96	6	-1.84	0.0326	514	0.978	0.967	16710	0.997
MAGEA11	-3.5	3	-1.84	0.0326	515	0.978	0.967	16709	0.997
PDHA1	-4.95	6	-1.84	0.0327	516	0.978	0.967	16708	0.997
TRAPPC3	-4.52	5	-1.84	0.0328	517	0.978	0.967	16707	0.997
C5orf48	-2.85	2	-1.84	0.033	518	0.978	0.967	16706	0.997
ZFP91	-4.94	6	-1.84	0.0331	519	0.978	0.967	16705	0.997
UMPS	-4.94	6	-1.84	0.0331	520	0.978	0.967	16704	0.997
MARC2	-4.94	6	-1.84	0.0331	521	0.978	0.967	16703	0.997
CIT	-4.93	6	-1.83	0.0334	522	0.978	0.967	16702	0.997
CD5	-4.93	6	-1.83	0.0334	523	0.978	0.967	16701	0.997
MIXL1	-4.92	6	-1.83	0.0336	524	0.978	0.966	16700	0.997
ACOT7	-4.92	6	-1.83	0.0338	525	0.978	0.966	16699	0.997
PTH	-2.84	2	-1.83	0.0338	526	0.978	0.966	16698	0.997
ZNF589	-4.91	6	-1.83	0.0339	527	0.978	0.966	16697	0.997
GINS1	-3.47	3	-1.83	0.034	528	0.978	0.966	16696	0.997
RBP2	-4.91	6	-1.82	0.0341	529	0.978	0.966	16695	0.996
PDP1	-4.48	5	-1.82	0.0341	530	0.978	0.966	16694	0.996
KIAA1109	-4.9	6	-1.82	0.0341	531	0.978	0.966	16693	0.996
TRIM6	-4.9	6	-1.82	0.0343	532	0.978	0.966	16692	0.996
PPP1R3G	-4.89	6	-1.82	0.0346	533	0.978	0.965	16691	0.996
RRP9	-4.89	6	-1.82	0.0347	534	0.978	0.965	16690	0.996
DOK2	-4.88	6	-1.82	0.0347	535	0.978	0.965	16689	0.996
JAG1	-4.88	6	-1.82	0.0347	536	0.978	0.965	16688	0.996
CCNYL1	-3.45	3	-1.81	0.035	537	0.978	0.965	16687	0.996
KIAA1549L	-4.87	6	-1.81	0.0351	538	0.978	0.965	16686	0.996
AIFM3	-4.86	6	-1.81	0.0353	539	0.978	0.965	16685	0.996
PTPRK	-4.86	6	-1.81	0.0353	540	0.978	0.965	16684	0.996
ATP6V0E2	-4.86	6	-1.81	0.0353	541	0.978	0.965	16683	0.996
RNPS1	-1.99	1	-1.81	0.0354	542	0.978	0.965	16682	0.996
CLIP3	-4.86	6	-1.81	0.0354	543	0.978	0.965	16681	0.996
UFL1	-4.44	5	-1.81	0.0354	544	0.978	0.965	16680	0.996
DCTD	-4.85	6	-1.8	0.0358	545	0.978	0.964	16679	0.996
MTMR7	-4.85	6	-1.8	0.0358	546	0.978	0.964	16678	0.996
PABPC1L	-4.84	6	-1.8	0.0359	547	0.978	0.964	16677	0.996
COL11A2	-4.84	6	-1.8	0.036	548	0.978	0.964	16676	0.996
MTSS1	-4.84	6	-1.8	0.036	549	0.978	0.964	16675	0.996
HES7	-4.84	6	-1.8	0.036	550	0.978	0.964	16674	0.996
TRMT11	-4.42	5	-1.8	0.036	551	0.978	0.964	16673	0.996
ZNF622	-4.84	6	-1.8	0.0361	552	0.978	0.964	16672	0.996
ARHGAP9	-4.84	6	-1.8	0.0362	553	0.978	0.964	16671	0.996
JAM2	-3.95	4	-1.8	0.0362	554	0.978	0.964	16670	0.996
ABCC8	-4.83	6	-1.8	0.0363	555	0.978	0.964	16669	0.996
SPERT	-4.4	5	-1.79	0.0365	556	0.978	0.963	16668	0.996
HAUS5	-4.82	6	-1.79	0.0365	557	0.978	0.963	16667	0.996
SHISA2	-4.82	6	-1.79	0.0366	558	0.978	0.963	16666	0.996
SLC2A1	-4.82	6	-1.79	0.0366	559	0.978	0.963	16665	0.996
PRR26	-4.82	6	-1.79	0.0366	560	0.978	0.963	16664	0.996
LSG1	-4.4	5	-1.79	0.0366	561	0.978	0.963	16663	0.996
FTSJD1	-4.4	5	-1.79	0.0368	562	0.978	0.963	16662	0.996
MRC2	-4.82	6	-1.79	0.0368	563	0.978	0.963	16661	0.996
NDUFV3	-4.81	6	-1.79	0.0369	564	0.978	0.963	16660	0.996
JMJD7	-4.81	6	-1.79	0.0369	565	0.978	0.963	16659	0.996
ZNF599	-4.39	5	-1.79	0.0371	566	0.978	0.963	16658	0.996
WWTR1	-4.8	6	-1.78	0.0372	567	0.978	0.963	16657	0.995
TOE1	-4.8	6	-1.78	0.0372	568	0.978	0.963	16656	0.995
CHD1	-4.8	6	-1.78	0.0373	569	0.978	0.963	16655	0.995
IFT81	-3.92	4	-1.78	0.0373	570	0.978	0.963	16654	0.995
FGF9	-4.79	6	-1.78	0.0376	571	0.978	0.962	16653	0.995
GABRP	-4.79	6	-1.78	0.0377	572	0.978	0.962	16652	0.995
AGO2	-4.79	6	-1.78	0.0377	573	0.978	0.962	16651	0.995
HRNR	-3.39	3	-1.78	0.0377	574	0.978	0.962	16650	0.995
SS18L2	-3.38	3	-1.78	0.0378	575	0.978	0.962	16649	0.995
RRP1B	-4.78	6	-1.77	0.038	576	0.978	0.962	16648	0.995
DNAJC4	-4.77	6	-1.77	0.0382	577	0.978	0.962	16647	0.995
C1orf54	-3.89	4	-1.77	0.0383	578	0.978	0.962	16646	0.995
HSPBP1	-4.77	6	-1.77	0.0383	579	0.978	0.962	16645	0.995
HECTD3	-4.77	6	-1.77	0.0383	580	0.978	0.962	16644	0.995
ATL1	-4.77	6	-1.77	0.0384	581	0.978	0.962	16643	0.995
KRTAP1-4	-1.94	1	-1.77	0.0385	582	0.978	0.961	16642	0.995
FBXL3	-4.76	6	-1.77	0.0386	583	0.978	0.961	16641	0.995
USF2	-4.75	6	-1.76	0.0388	584	0.978	0.961	16640	0.995
CCDC135	-4.75	6	-1.76	0.0389	585	0.978	0.961	16639	0.995
CDK6	-4.75	6	-1.76	0.0389	586	0.978	0.961	16638	0.995
SLC35F4	-4.75	6	-1.76	0.039	587	0.978	0.961	16637	0.995
RNF146	-4.75	6	-1.76	0.039	588	0.978	0.961	16636	0.995
ALDH4A1	-4.75	6	-1.76	0.039	589	0.978	0.961	16635	0.995
C19orf71	-4.74	6	-1.76	0.0392	590	0.978	0.961	16634	0.995
WRNIP1	-4.74	6	-1.76	0.0393	591	0.978	0.961	16633	0.995
SMOC1	-4.74	6	-1.76	0.0394	592	0.978	0.961	16632	0.995
EXOSC3	-3.87	4	-1.76	0.0394	593	0.978	0.961	16631	0.995
BRAP	-4.73	6	-1.76	0.0394	594	0.978	0.961	16630	0.995
TPPP2	-4.73	6	-1.76	0.0396	595	0.978	0.96	16629	0.995
CRISP2	-3.34	3	-1.76	0.0396	596	0.978	0.96	16628	0.995
CWF19L1	-4.73	6	-1.76	0.0396	597	0.978	0.96	16627	0.995
SREBF2	-4.73	6	-1.76	0.0396	598	0.978	0.96	16626	0.995
TEKT1	-4.73	6	-1.75	0.0397	599	0.978	0.96	16625	0.995
EMC2	-1.93	1	-1.75	0.0397	600	0.978	0.96	16624	0.995
C1orf112	-4.73	6	-1.75	0.0397	601	0.978	0.96	16623	0.995
PLAC9	-2.73	2	-1.75	0.0398	602	0.978	0.96	16622	0.995
CITED2	-3.34	3	-1.75	0.0398	603	0.978	0.96	16621	0.995
ZCRB1	-1.93	1	-1.75	0.0399	604	0.978	0.96	16620	0.995
B3GALT2	-3.85	4	-1.75	0.04	605	0.978	0.96	16619	0.995
CCL13	-1.93	1	-1.75	0.0401	606	0.978	0.96	16618	0.995
C3orf58	-4.71	6	-1.75	0.0401	607	0.978	0.96	16617	0.995
SLC25A12	-4.71	6	-1.75	0.0404	608	0.978	0.96	16616	0.995
ATXN7L3	-4.71	6	-1.75	0.0404	609	0.978	0.96	16615	0.995
KLF16	-4.7	6	-1.74	0.0406	610	0.978	0.959	16614	0.995
ZNF41	-3.32	3	-1.74	0.0406	611	0.978	0.959	16613	0.995
CDC42EP1	-4.29	5	-1.74	0.0406	612	0.978	0.959	16612	0.995
RFC3	-4.7	6	-1.74	0.0406	613	0.978	0.959	16611	0.995
CHST7	-4.7	6	-1.74	0.0406	614	0.978	0.959	16610	0.995
KRT38	-4.28	5	-1.74	0.041	615	0.978	0.959	16609	0.994
CEP350	-4.69	6	-1.74	0.041	616	0.978	0.959	16608	0.994
GPR173	-4.28	5	-1.74	0.0411	617	0.978	0.959	16607	0.994
UBR5	-4.68	6	-1.74	0.0413	618	0.978	0.959	16606	0.994
SEC61A2	-4.68	6	-1.74	0.0413	619	0.978	0.959	16605	0.994
SVIP	-1.91	1	-1.73	0.0414	620	0.978	0.959	16604	0.994
DHRS7B	-4.67	6	-1.73	0.0416	621	0.978	0.958	16603	0.994
NAA30	-4.26	5	-1.73	0.0416	622	0.978	0.958	16602	0.994
INSIG1	-4.67	6	-1.73	0.0416	623	0.978	0.958	16601	0.994
LSM14A	-4.67	6	-1.73	0.0416	624	0.978	0.958	16600	0.994
STK11	-4.67	6	-1.73	0.0417	625	0.978	0.958	16599	0.994
TIAL1	-4.67	6	-1.73	0.0417	626	0.978	0.958	16598	0.994
KIAA1432	-4.67	6	-1.73	0.0417	627	0.978	0.958	16597	0.994
SNIP1	-4.26	5	-1.73	0.0417	628	0.978	0.958	16596	0.994
GLYAT	-4.26	5	-1.73	0.0418	629	0.978	0.958	16595	0.994
MARK2	-4.66	6	-1.73	0.0418	630	0.978	0.958	16594	0.994
FANCL	-3.29	3	-1.72	0.0424	631	0.978	0.958	16593	0.994
TAS1R2	-4.65	6	-1.72	0.0424	632	0.978	0.958	16592	0.994
NVL	-4.65	6	-1.72	0.0424	633	0.978	0.958	16591	0.994
DCX	-4.65	6	-1.72	0.0424	634	0.978	0.958	16590	0.994
USH1C	-4.65	6	-1.72	0.0425	635	0.978	0.958	16589	0.994
TTC17	-4.64	6	-1.72	0.0426	636	0.978	0.957	16588	0.994
AZI1	-4.64	6	-1.72	0.0426	637	0.978	0.957	16587	0.994
MORN2	-3.28	3	-1.72	0.0428	638	0.978	0.957	16586	0.994
IMMT	-4.63	6	-1.72	0.0429	639	0.978	0.957	16585	0.994
SOCS6	-3.28	3	-1.72	0.0429	640	0.978	0.957	16584	0.994
CPD	-4.63	6	-1.72	0.0429	641	0.978	0.957	16583	0.994
AGPAT1	-4.63	6	-1.72	0.043	642	0.978	0.957	16582	0.994
MS4A2	-3.27	3	-1.72	0.0431	643	0.978	0.957	16581	0.994
KNDC1	-4.62	6	-1.71	0.0432	644	0.978	0.957	16580	0.994
OTOP3	-4.62	6	-1.71	0.0432	645	0.978	0.957	16579	0.994
IRF5	-4.62	6	-1.71	0.0432	646	0.978	0.957	16578	0.994
TMX2	-4.22	5	-1.71	0.0433	647	0.978	0.957	16577	0.994
FSBP	-4.22	5	-1.71	0.0434	648	0.978	0.957	16576	0.994
COL20A1	-4.62	6	-1.71	0.0434	649	0.978	0.957	16575	0.994
SEPT5	-4.62	6	-1.71	0.0434	650	0.978	0.957	16574	0.994
UBL4B	-3.77	4	-1.71	0.0436	651	0.978	0.956	16573	0.994
TSPAN5	-3.76	4	-1.71	0.0437	652	0.978	0.956	16572	0.994
RIF1	-4.61	6	-1.71	0.0437	653	0.978	0.956	16571	0.994
IMP3	-3.76	4	-1.71	0.0439	654	0.978	0.956	16570	0.994
TRIM72	-4.6	6	-1.71	0.0439	655	0.978	0.956	16569	0.994
RAPGEF3	-4.6	6	-1.71	0.044	656	0.978	0.956	16568	0.994
BPIFB6	-4.6	6	-1.7	0.0442	657	0.978	0.956	16567	0.994
BEND6	-2.65	2	-1.7	0.0444	658	0.978	0.956	16566	0.993
GALNT12	-4.59	6	-1.7	0.0445	659	0.978	0.956	16565	0.993
ZNF593	-4.19	5	-1.7	0.0445	660	0.978	0.955	16564	0.993
ZG16	-4.58	6	-1.7	0.0447	661	0.978	0.955	16563	0.993
NPRL3	-4.58	6	-1.7	0.0447	662	0.978	0.955	16562	0.993
DKK2	-4.58	6	-1.7	0.0449	663	0.978	0.955	16561	0.993
EME1	-4.58	6	-1.7	0.0449	664	0.978	0.955	16560	0.993
APOO	-2.64	2	-1.7	0.0449	665	0.978	0.955	16559	0.993
ROCK2	-4.57	6	-1.7	0.045	666	0.978	0.955	16558	0.993
FYCO1	-4.57	6	-1.69	0.0451	667	0.978	0.955	16557	0.993
TEAD4	-4.57	6	-1.69	0.0452	668	0.978	0.955	16556	0.993
INO80D	-4.57	6	-1.69	0.0453	669	0.978	0.955	16555	0.993
RANBP3	-4.56	6	-1.69	0.0454	670	0.978	0.955	16554	0.993
SLC29A4	-4.16	5	-1.69	0.0455	671	0.978	0.955	16553	0.993
KLHDC8A	-4.56	6	-1.69	0.0455	672	0.978	0.954	16552	0.993
RQCD1	-4.56	6	-1.69	0.0455	673	0.978	0.954	16551	0.993
SLC25A5	-1.86	1	-1.69	0.0456	674	0.978	0.954	16550	0.993
FMN2	-4.56	6	-1.69	0.0457	675	0.978	0.954	16549	0.993
HOXA3	-4.55	6	-1.69	0.046	676	0.978	0.954	16548	0.993
CACNG6	-4.55	6	-1.68	0.046	677	0.978	0.954	16547	0.993
OR5J2	-2.63	2	-1.68	0.046	678	0.978	0.954	16546	0.993
TMBIM1	-4.55	6	-1.68	0.0461	679	0.978	0.954	16545	0.993
C19orf35	-4.55	6	-1.68	0.0461	680	0.978	0.954	16544	0.993
CLMP	-4.54	6	-1.68	0.0461	681	0.978	0.954	16543	0.993
C1orf27	-3.71	4	-1.68	0.0462	682	0.978	0.954	16542	0.993
SPI1	-4.54	6	-1.68	0.0463	683	0.978	0.954	16541	0.993
CAPN9	-4.54	6	-1.68	0.0463	684	0.978	0.954	16540	0.993
IGBP1	-2.62	2	-1.68	0.0464	685	0.978	0.954	16539	0.993
RPL3	-1.85	1	-1.68	0.0464	686	0.978	0.954	16538	0.993
KRTAP10-7	-1.85	1	-1.68	0.0465	687	0.978	0.954	16537	0.993
PRDX2	-2.62	2	-1.68	0.0465	688	0.978	0.953	16536	0.993
MOCS2	-2.62	2	-1.68	0.0466	689	0.978	0.953	16535	0.993
TMEM182	-3.7	4	-1.68	0.0467	690	0.978	0.953	16534	0.993
C22orf26	-3.2	3	-1.68	0.0468	691	0.978	0.953	16533	0.993
CD34	-4.52	6	-1.68	0.0469	692	0.978	0.953	16532	0.993
TYRO3	-4.52	6	-1.68	0.047	693	0.978	0.953	16531	0.993
CAMP	-4.13	5	-1.67	0.047	694	0.978	0.953	16530	0.993
GFOD1	-4.52	6	-1.67	0.047	695	0.978	0.953	16529	0.993
EDC3	-4.52	6	-1.67	0.047	696	0.978	0.953	16528	0.993
APCDD1L	-4.52	6	-1.67	0.0471	697	0.978	0.953	16527	0.993
ABCG5	-4.52	6	-1.67	0.0471	698	0.978	0.953	16526	0.993
FLII	-4.52	6	-1.67	0.0472	699	0.978	0.953	16525	0.993
MCM5	-4.12	5	-1.67	0.0472	700	0.978	0.953	16524	0.993
RPS6KB1	-4.12	5	-1.67	0.0472	701	0.978	0.953	16523	0.993
SIRT1	-4.51	6	-1.67	0.0473	702	0.978	0.953	16522	0.993
OR2B6	-1.84	1	-1.67	0.0474	703	0.978	0.953	16521	0.993
GADD45A	-4.51	6	-1.67	0.0474	704	0.978	0.953	16520	0.993
NR3C2	-4.51	6	-1.67	0.0476	705	0.978	0.952	16519	0.993
ARHGAP15	-3.68	4	-1.67	0.0478	706	0.978	0.952	16518	0.993
PNISR	-4.5	6	-1.67	0.0478	707	0.978	0.952	16517	0.993
SPPL2C	-4.11	5	-1.67	0.0478	708	0.978	0.952	16516	0.993
BPIFB1	-4.5	6	-1.67	0.0478	709	0.978	0.952	16515	0.993
SSH3	-4.5	6	-1.67	0.0479	710	0.978	0.952	16514	0.993
C1QTNF4	-3.18	3	-1.66	0.048	711	0.978	0.952	16513	0.993
LAMC1	-4.49	6	-1.66	0.048	712	0.978	0.952	16512	0.993
BTBD16	-4.49	6	-1.66	0.0482	713	0.978	0.952	16511	0.993
ATP8A2	-4.49	6	-1.66	0.0483	714	0.978	0.952	16510	0.993
DHRS7C	-4.49	6	-1.66	0.0484	715	0.978	0.952	16509	0.993
MEF2A	-4.48	6	-1.66	0.0484	716	0.978	0.952	16508	0.993
AVPR1B	-4.48	6	-1.66	0.0487	717	0.978	0.951	16507	0.993
SESN2	-4.47	6	-1.66	0.0489	718	0.978	0.951	16506	0.992
PTGDS	-4.47	6	-1.66	0.049	719	0.978	0.951	16505	0.992
ANKMY1	-4.47	6	-1.65	0.049	720	0.978	0.951	16504	0.992
BTN1A1	-4.47	6	-1.65	0.049	721	0.978	0.951	16503	0.992
NANOS2	-4.08	5	-1.65	0.0491	722	0.978	0.951	16502	0.992
C12orf66	-4.46	6	-1.65	0.0493	723	0.978	0.951	16501	0.992
ATP2A1	-4.46	6	-1.65	0.0495	724	0.978	0.951	16500	0.992
NUDCD1	-4.46	6	-1.65	0.0495	725	0.978	0.951	16499	0.992
IL27RA	-4.46	6	-1.65	0.0495	726	0.978	0.95	16498	0.992
KPTN	-4.46	6	-1.65	0.0495	727	0.978	0.95	16497	0.992
JUND	-4.45	6	-1.65	0.0498	728	0.978	0.95	16496	0.992
ZNF572	-3.63	4	-1.65	0.0499	729	0.978	0.95	16495	0.992
NXPE3	-4.45	6	-1.65	0.05	730	0.978	0.95	16494	0.992
ZBTB26	-2.57	2	-1.64	0.05	731	0.978	0.95	16493	0.992
KRTAP21-2	-1.81	1	-1.64	0.0501	732	0.978	0.95	16492	0.992
GP1BB	-4.06	5	-1.64	0.0501	733	0.978	0.95	16491	0.992
SENP1	-4.44	6	-1.64	0.0501	734	0.978	0.95	16490	0.992
HNRNPA2B1	-4.44	6	-1.64	0.0501	735	0.978	0.95	16489	0.992
STK3	-4.44	6	-1.64	0.0502	736	0.978	0.95	16488	0.992
COLGALT2	-4.44	6	-1.64	0.0502	737	0.978	0.95	16487	0.992
CHERP	-4.44	6	-1.64	0.0502	738	0.978	0.95	16486	0.992
HOXC11	-4.44	6	-1.64	0.0502	739	0.978	0.95	16485	0.992
C17orf50	-4.44	6	-1.64	0.0503	740	0.978	0.95	16484	0.992
E2F4	-4.44	6	-1.64	0.0504	741	0.978	0.95	16483	0.992
NLRP2	-4.44	6	-1.64	0.0504	742	0.978	0.95	16482	0.992
ESCO2	-3.13	3	-1.64	0.0505	743	0.978	0.949	16481	0.992
CLDND1	-4.43	6	-1.64	0.0506	744	0.978	0.949	16480	0.992
IL36A	-4.04	5	-1.64	0.0506	745	0.978	0.949	16479	0.992
ULK3	-4.43	6	-1.64	0.0507	746	0.978	0.949	16478	0.992
SCUBE2	-4.43	6	-1.64	0.0507	747	0.978	0.949	16477	0.992
SRBD1	-3.61	4	-1.64	0.0509	748	0.978	0.949	16476	0.992
ZNF100	-1.81	1	-1.64	0.0509	749	0.978	0.949	16475	0.992
EFCAB13	-2.55	2	-1.64	0.051	750	0.978	0.949	16474	0.992
TIGD3	-4.42	6	-1.63	0.051	751	0.978	0.949	16473	0.992
ST6GALNAC6	-4.42	6	-1.63	0.0511	752	0.978	0.949	16472	0.992
CACFD1	-4.41	6	-1.63	0.0512	753	0.978	0.949	16471	0.992
SNX15	-4.41	6	-1.63	0.0512	754	0.978	0.949	16470	0.992
GTF2E2	-3.6	4	-1.63	0.0513	755	0.978	0.949	16469	0.992
RAB25	-4.03	5	-1.63	0.0513	756	0.978	0.949	16468	0.992
C11orf21	-4.41	6	-1.63	0.0514	757	0.978	0.949	16467	0.992
C11orf87	-4.02	5	-1.63	0.0515	758	0.978	0.949	16466	0.992
DHX32	-4.41	6	-1.63	0.0515	759	0.978	0.949	16465	0.992
PSPN	-3.12	3	-1.63	0.0515	760	0.978	0.948	16464	0.992
CNN1	-4.41	6	-1.63	0.0516	761	0.978	0.948	16463	0.992
C18orf25	-2.54	2	-1.63	0.0516	762	0.978	0.948	16462	0.992
CEP95	-4.4	6	-1.63	0.0516	763	0.978	0.948	16461	0.992
CLIC3	-4.4	6	-1.63	0.0517	764	0.978	0.948	16460	0.992
C9orf47	-4.4	6	-1.63	0.0518	765	0.978	0.948	16459	0.992
RPAIN	-4.02	5	-1.63	0.0518	766	0.978	0.948	16458	0.992
C1D	-1.8	1	-1.63	0.0519	767	0.978	0.948	16457	0.992
ISL2	-4.4	6	-1.63	0.0519	768	0.978	0.948	16456	0.992
LRRN4CL	-4.01	5	-1.63	0.0519	769	0.978	0.948	16455	0.992
HDC	-4.4	6	-1.63	0.052	770	0.978	0.948	16454	0.992
CNGA4	-4.4	6	-1.63	0.052	771	0.978	0.948	16453	0.992
STK32C	-4.39	6	-1.63	0.052	772	0.978	0.948	16452	0.992
MAP3K4	-4.39	6	-1.62	0.0523	773	0.978	0.948	16451	0.992
B3GNT3	-4.39	6	-1.62	0.0524	774	0.978	0.948	16450	0.992
UFM1	-2.53	2	-1.62	0.0524	775	0.978	0.948	16449	0.992
KLHDC10	-4.38	6	-1.62	0.0525	776	0.978	0.948	16448	0.992
PPP1CC	-3.58	4	-1.62	0.0525	777	0.978	0.947	16447	0.992
MED24	-4.38	6	-1.62	0.0525	778	0.978	0.947	16446	0.992
APBA3	-4.38	6	-1.62	0.0526	779	0.978	0.947	16445	0.992
CD248	-4	5	-1.62	0.0527	780	0.978	0.947	16444	0.992
DMBT1	-4.38	6	-1.62	0.0528	781	0.978	0.947	16443	0.992
DSC3	-4.38	6	-1.62	0.0528	782	0.978	0.947	16442	0.992
C20orf96	-4.37	6	-1.62	0.0529	783	0.978	0.947	16441	0.992
AGAP2	-4.37	6	-1.62	0.0529	784	0.978	0.947	16440	0.992
KIRREL3	-4.37	6	-1.62	0.0531	785	0.978	0.947	16439	0.992
BECN1	-3.99	5	-1.62	0.0531	786	0.978	0.947	16438	0.992
B3GAT1	-4.36	6	-1.61	0.0533	787	0.978	0.947	16437	0.992
KRT13	-4.36	6	-1.61	0.0533	788	0.978	0.947	16436	0.992
PCK2	-4.36	6	-1.61	0.0535	789	0.978	0.947	16435	0.992
HPDL	-4.36	6	-1.61	0.0535	790	0.978	0.947	16434	0.992
KLK9	-3.98	5	-1.61	0.0536	791	0.978	0.946	16433	0.992
TRPC4	-4.35	6	-1.61	0.0537	792	0.978	0.946	16432	0.992
MKNK2	-4.35	6	-1.61	0.0537	793	0.978	0.946	16431	0.992
THAP4	-4.35	6	-1.61	0.0537	794	0.978	0.946	16430	0.992
TMEM101	-4.35	6	-1.61	0.0538	795	0.978	0.946	16429	0.992
CHPF	-4.35	6	-1.61	0.0538	796	0.978	0.946	16428	0.992
EMR3	-4.35	6	-1.61	0.0539	797	0.978	0.946	16427	0.992
NKAIN2	-3.55	4	-1.61	0.054	798	0.978	0.946	16426	0.992
SLC35A2	-4.35	6	-1.61	0.0541	799	0.978	0.946	16425	0.992
ABCA13	-4.34	6	-1.6	0.0544	800	0.978	0.946	16424	0.992
FOXH1	-4.34	6	-1.6	0.0544	801	0.978	0.946	16423	0.992
DNAH2	-4.34	6	-1.6	0.0545	802	0.978	0.945	16422	0.992
DYRK1A	-4.33	6	-1.6	0.0547	803	0.978	0.945	16421	0.991
RNF168	-4.33	6	-1.6	0.0548	804	0.978	0.945	16420	0.991
PTPN11	-2.5	2	-1.6	0.0548	805	0.978	0.945	16419	0.991
C16orf78	-4.33	6	-1.6	0.0549	806	0.978	0.945	16418	0.991
CTSC	-4.33	6	-1.6	0.0549	807	0.978	0.945	16417	0.991
WDYHV1	-3.95	5	-1.6	0.0549	808	0.978	0.945	16416	0.991
TCEB3	-4.32	6	-1.6	0.0551	809	0.978	0.945	16415	0.991
HIPK4	-4.32	6	-1.6	0.0551	810	0.978	0.945	16414	0.991
TMEM259	-4.32	6	-1.6	0.0551	811	0.978	0.945	16413	0.991
DCAF16	-1.76	1	-1.6	0.0552	812	0.978	0.945	16412	0.991
DBX2	-4.32	6	-1.6	0.0553	813	0.978	0.945	16411	0.991
CD22	-4.32	6	-1.59	0.0554	814	0.978	0.945	16410	0.991
CD320	-4.32	6	-1.59	0.0554	815	0.978	0.945	16409	0.991
N4BP1	-4.32	6	-1.59	0.0554	816	0.978	0.945	16408	0.991
OSBPL2	-4.32	6	-1.59	0.0554	817	0.978	0.945	16407	0.991
PKP2	-4.31	6	-1.59	0.0555	818	0.978	0.944	16406	0.991
TRIM11	-4.31	6	-1.59	0.0556	819	0.978	0.944	16405	0.991
CLN6	-4.31	6	-1.59	0.0557	820	0.978	0.944	16404	0.991
ASF1A	-4.31	6	-1.59	0.0558	821	0.978	0.944	16403	0.991
CHMP3	-3.52	4	-1.59	0.0558	822	0.978	0.944	16402	0.991
TRIAP1	-3.51	4	-1.59	0.0559	823	0.978	0.944	16401	0.991
C1GALT1C1	-1.76	1	-1.59	0.0559	824	0.978	0.944	16400	0.991
PTPRQ	-4.3	6	-1.59	0.0559	825	0.978	0.944	16399	0.991
SLC16A4	-4.3	6	-1.59	0.0559	826	0.978	0.944	16398	0.991
ATRN	-4.3	6	-1.59	0.0559	827	0.978	0.944	16397	0.991
ERCC6L2	-4.3	6	-1.59	0.0559	828	0.978	0.944	16396	0.991
DUSP8	-3.93	5	-1.59	0.0559	829	0.978	0.944	16395	0.991
GTF2IRD1	-4.3	6	-1.59	0.056	830	0.978	0.944	16394	0.991
ZSWIM6	-4.3	6	-1.59	0.0561	831	0.978	0.944	16393	0.991
PTGIS	-4.3	6	-1.59	0.0561	832	0.978	0.944	16392	0.991
AP1G2	-4.3	6	-1.59	0.0561	833	0.978	0.944	16391	0.991
EMC10	-4.3	6	-1.59	0.0562	834	0.978	0.944	16390	0.991
GFAP	-4.3	6	-1.59	0.0562	835	0.978	0.944	16389	0.991
ASCC2	-4.3	6	-1.59	0.0563	836	0.978	0.944	16388	0.991
EFNB2	-4.3	6	-1.59	0.0563	837	0.978	0.944	16387	0.991
NR2C2	-4.29	6	-1.59	0.0563	838	0.978	0.944	16386	0.991
WDR12	-1.75	1	-1.59	0.0563	839	0.978	0.944	16385	0.991
KRT15	-4.29	6	-1.59	0.0563	840	0.978	0.944	16384	0.991
DNAH17	-4.29	6	-1.59	0.0564	841	0.978	0.944	16383	0.991
GPR119	-3.92	5	-1.59	0.0564	842	0.978	0.944	16382	0.991
RUSC1	-4.29	6	-1.58	0.0565	843	0.978	0.944	16381	0.991
ADPRH	-4.29	6	-1.58	0.0566	844	0.978	0.943	16380	0.991
CENPV	-3.91	5	-1.58	0.0567	845	0.978	0.943	16379	0.991
DNALI1	-4.28	6	-1.58	0.0571	846	0.978	0.943	16378	0.991
PLXNB3	-4.28	6	-1.58	0.0572	847	0.978	0.943	16377	0.991
IGFL3	-1.74	1	-1.58	0.0572	848	0.978	0.943	16376	0.991
DSE	-3.9	5	-1.58	0.0573	849	0.978	0.943	16375	0.991
PRDM6	-4.27	6	-1.58	0.0574	850	0.978	0.943	16374	0.991
CHST6	-4.27	6	-1.58	0.0574	851	0.978	0.943	16373	0.991
DRD3	-4.27	6	-1.58	0.0574	852	0.978	0.943	16372	0.991
MFHAS1	-3.9	5	-1.58	0.0575	853	0.978	0.942	16371	0.991
DYX1C1	-4.26	6	-1.58	0.0576	854	0.978	0.942	16370	0.991
NLRC3	-4.26	6	-1.57	0.0577	855	0.978	0.942	16369	0.991
HEMK1	-4.26	6	-1.57	0.0578	856	0.978	0.942	16368	0.991
SLC52A3	-4.26	6	-1.57	0.0578	857	0.978	0.942	16367	0.991
CHADL	-4.26	6	-1.57	0.0578	858	0.978	0.942	16366	0.991
AP3S2	-4.26	6	-1.57	0.058	859	0.978	0.942	16365	0.991
GMPPB	-4.26	6	-1.57	0.058	860	0.978	0.942	16364	0.991
ZP1	-4.26	6	-1.57	0.058	861	0.978	0.942	16363	0.991
LRRC6	-1.74	1	-1.57	0.0582	862	0.978	0.942	16362	0.991
ACTRT3	-4.25	6	-1.57	0.0582	863	0.978	0.942	16361	0.991
CNBP	-4.25	6	-1.57	0.0583	864	0.978	0.942	16360	0.991
SLC10A7	-4.25	6	-1.57	0.0584	865	0.978	0.942	16359	0.991
ISX	-4.25	6	-1.57	0.0585	866	0.978	0.942	16358	0.991
ACAA2	-3.47	4	-1.57	0.0585	867	0.978	0.942	16357	0.991
TMEM5	-4.24	6	-1.57	0.0586	868	0.978	0.941	16356	0.991
ITIH2	-4.24	6	-1.57	0.0586	869	0.978	0.941	16355	0.991
SHC1	-4.24	6	-1.57	0.0586	870	0.978	0.941	16354	0.991
FRMPD2	-4.24	6	-1.57	0.0586	871	0.978	0.941	16353	0.991
SLC25A37	-4.24	6	-1.57	0.0587	872	0.978	0.941	16352	0.991
PRAM1	-4.24	6	-1.57	0.0587	873	0.978	0.941	16351	0.991
TOPORS	-4.24	6	-1.57	0.0587	874	0.978	0.941	16350	0.991
PTPRG	-4.24	6	-1.57	0.0587	875	0.978	0.941	16349	0.991
HELQ	-4.24	6	-1.57	0.0588	876	0.978	0.941	16348	0.991
FAM104A	-4.24	6	-1.57	0.0588	877	0.978	0.941	16347	0.991
LILRB1	-1.73	1	-1.56	0.0588	878	0.978	0.941	16346	0.991
OR56A3	-2.44	2	-1.56	0.0591	879	0.978	0.941	16345	0.991
CC2D1A	-4.23	6	-1.56	0.0593	880	0.978	0.941	16344	0.991
TJP3	-4.23	6	-1.56	0.0594	881	0.978	0.941	16343	0.991
METTL6	-2.99	3	-1.56	0.0595	882	0.978	0.941	16342	0.991
BATF	-3.85	5	-1.56	0.0595	883	0.978	0.94	16341	0.991
NBEAL1	-4.22	6	-1.56	0.0596	884	0.978	0.94	16340	0.991
RFC5	-4.22	6	-1.56	0.0597	885	0.978	0.94	16339	0.991
RPTOR	-4.22	6	-1.56	0.0597	886	0.978	0.94	16338	0.991
KCNJ10	-3.85	5	-1.56	0.0597	887	0.978	0.94	16337	0.991
DPPA5	-1.72	1	-1.56	0.0597	888	0.978	0.94	16336	0.991
ZNF33A	-2.43	2	-1.56	0.0599	889	0.978	0.94	16335	0.991
RBBP7	-4.21	6	-1.56	0.0599	890	0.978	0.94	16334	0.991
MED22	-4.21	6	-1.56	0.0599	891	0.978	0.94	16333	0.991
ZBTB8A	-4.21	6	-1.56	0.0599	892	0.978	0.94	16332	0.991
RAB8B	-4.21	6	-1.55	0.06	893	0.978	0.94	16331	0.991
GPR75	-3.84	5	-1.55	0.0601	894	0.978	0.94	16330	0.991
DOC2A	-4.21	6	-1.55	0.0601	895	0.978	0.94	16329	0.991
ATIC	-4.21	6	-1.55	0.0601	896	0.978	0.94	16328	0.991
ATP10D	-4.21	6	-1.55	0.0602	897	0.978	0.94	16327	0.991
GPR26	-4.21	6	-1.55	0.0602	898	0.978	0.94	16326	0.991
SPRYD7	-3.84	5	-1.55	0.0602	899	0.978	0.94	16325	0.991
ENDOV	-4.21	6	-1.55	0.0603	900	0.978	0.94	16324	0.991
TAF3	-4.2	6	-1.55	0.0604	901	0.978	0.94	16323	0.991
PDE10A	-4.2	6	-1.55	0.0604	902	0.978	0.94	16322	0.991
SMYD3	-4.2	6	-1.55	0.0604	903	0.978	0.94	16321	0.991
SLC1A1	-4.2	6	-1.55	0.0605	904	0.978	0.94	16320	0.991
PSMD4	-2.43	2	-1.55	0.0605	905	0.978	0.939	16319	0.991
FADS6	-4.2	6	-1.55	0.0607	906	0.978	0.939	16318	0.991
MGAT1	-4.19	6	-1.55	0.0609	907	0.978	0.939	16317	0.991
GLA	-4.19	6	-1.55	0.0609	908	0.978	0.939	16316	0.991
SLC7A11	-4.19	6	-1.54	0.0612	909	0.978	0.939	16315	0.991
MDC1	-4.18	6	-1.54	0.0614	910	0.978	0.939	16314	0.991
SIN3B	-4.18	6	-1.54	0.0614	911	0.978	0.939	16313	0.991
DNAJC8	-2.41	2	-1.54	0.0615	912	0.978	0.939	16312	0.991
SMIM10	-2.41	2	-1.54	0.0617	913	0.978	0.938	16311	0.991
EFNB3	-4.18	6	-1.54	0.0618	914	0.978	0.938	16310	0.991
ERCC4	-4.17	6	-1.54	0.0618	915	0.978	0.938	16309	0.991
OR2Z1	-4.17	6	-1.54	0.0619	916	0.978	0.938	16308	0.991
NLRC4	-4.17	6	-1.54	0.0619	917	0.978	0.938	16307	0.991
MAVS	-4.17	6	-1.54	0.062	918	0.978	0.938	16306	0.991
ARVCF	-4.17	6	-1.54	0.062	919	0.978	0.938	16305	0.991
OTUD7A	-4.17	6	-1.54	0.0621	920	0.978	0.938	16304	0.991
CAMK2D	-2.94	3	-1.54	0.0623	921	0.978	0.938	16303	0.991
GTF2B	-4.16	6	-1.54	0.0623	922	0.978	0.938	16302	0.991
RAD51B	-4.16	6	-1.54	0.0623	923	0.978	0.938	16301	0.991
CDHR1	-4.16	6	-1.54	0.0624	924	0.978	0.938	16300	0.991
MBOAT4	-4.16	6	-1.53	0.0624	925	0.978	0.938	16299	0.991
GREB1L	-4.16	6	-1.53	0.0624	926	0.978	0.938	16298	0.991
RABGEF1	-2.4	2	-1.53	0.0624	927	0.978	0.938	16297	0.991
KCNA7	-4.16	6	-1.53	0.0626	928	0.978	0.937	16296	0.991
XAF1	-4.16	6	-1.53	0.0626	929	0.978	0.937	16295	0.991
GPR101	-4.16	6	-1.53	0.0626	930	0.978	0.937	16294	0.991
CYP4F3	-2.94	3	-1.53	0.0628	931	0.978	0.937	16293	0.991
BAG3	-4.15	6	-1.53	0.0628	932	0.978	0.937	16292	0.991
EFCAB4B	-4.15	6	-1.53	0.0628	933	0.978	0.937	16291	0.991
PDZD2	-4.15	6	-1.53	0.0629	934	0.978	0.937	16290	0.991
NME3	-4.15	6	-1.53	0.063	935	0.978	0.937	16289	0.991
FGFR3	-4.15	6	-1.53	0.063	936	0.978	0.937	16288	0.991
TMEM235	-4.15	6	-1.53	0.063	937	0.978	0.937	16287	0.991
SEC16A	-4.15	6	-1.53	0.0632	938	0.978	0.937	16286	0.991
PEX1	-4.14	6	-1.53	0.0635	939	0.978	0.937	16285	0.99
PRRG2	-4.14	6	-1.53	0.0635	940	0.978	0.937	16284	0.99
IRF7	-4.14	6	-1.53	0.0635	941	0.978	0.937	16283	0.99
BRD4	-4.14	6	-1.53	0.0635	942	0.978	0.937	16282	0.99
GINM1	-3.38	4	-1.52	0.0637	943	0.978	0.936	16281	0.99
TTC23L	-4.13	6	-1.52	0.0638	944	0.978	0.936	16280	0.99
RNASE10	-2.92	3	-1.52	0.0638	945	0.978	0.936	16279	0.99
SUSD2	-4.13	6	-1.52	0.0639	946	0.978	0.936	16278	0.99
CA8	-3.77	5	-1.52	0.064	947	0.978	0.936	16277	0.99
ARL6IP1	-2.92	3	-1.52	0.064	948	0.978	0.936	16276	0.99
DAO	-4.13	6	-1.52	0.0641	949	0.978	0.936	16275	0.99
TRPM6	-4.12	6	-1.52	0.0642	950	0.978	0.936	16274	0.99
APOF	-3.76	5	-1.52	0.0643	951	0.978	0.936	16273	0.99
EFCC1	-4.12	6	-1.52	0.0644	952	0.978	0.936	16272	0.99
NUP43	-4.12	6	-1.52	0.0645	953	0.978	0.936	16271	0.99
FAM114A2	-3.76	5	-1.52	0.0645	954	0.978	0.935	16270	0.99
STRA8	-4.11	6	-1.52	0.0647	955	0.978	0.935	16269	0.99
TRDN	-3.76	5	-1.52	0.0647	956	0.978	0.935	16268	0.99
C15orf27	-4.11	6	-1.52	0.0649	957	0.978	0.935	16267	0.99
RELL1	-4.11	6	-1.52	0.0649	958	0.978	0.935	16266	0.99
CDT1	-4.11	6	-1.51	0.0649	959	0.978	0.935	16265	0.99
GTF2H4	-4.11	6	-1.51	0.0649	960	0.978	0.935	16264	0.99
MFSD10	-4.11	6	-1.51	0.0649	961	0.978	0.935	16263	0.99
RPS6KL1	-4.11	6	-1.51	0.065	962	0.978	0.935	16262	0.99
DKKL1	-4.11	6	-1.51	0.065	963	0.978	0.935	16261	0.99
OR52W1	-3.35	4	-1.51	0.065	964	0.978	0.935	16260	0.99
MCCD1	-1.68	1	-1.51	0.065	965	0.978	0.935	16259	0.99
UBQLN3	-4.11	6	-1.51	0.0651	966	0.978	0.935	16258	0.99
TXNDC8	-2.37	2	-1.51	0.0651	967	0.978	0.935	16257	0.99
ANO7	-4.1	6	-1.51	0.0651	968	0.978	0.935	16256	0.99
GATAD2B	-4.1	6	-1.51	0.0653	969	0.978	0.935	16255	0.99
BAI3	-4.1	6	-1.51	0.0654	970	0.978	0.935	16254	0.99
C14orf166B	-4.1	6	-1.51	0.0655	971	0.978	0.935	16253	0.99
ITGB8	-4.1	6	-1.51	0.0655	972	0.978	0.935	16252	0.99
ZNF205	-4.09	6	-1.51	0.0657	973	0.978	0.934	16251	0.99
PPP3R1	-4.09	6	-1.51	0.0657	974	0.978	0.934	16250	0.99
KANSL2	-4.09	6	-1.51	0.0658	975	0.978	0.934	16249	0.99
C11orf88	-3.34	4	-1.51	0.066	976	0.978	0.934	16248	0.99
MNX1	-4.09	6	-1.51	0.066	977	0.978	0.934	16247	0.99
METAP2	-4.08	6	-1.5	0.0663	978	0.978	0.934	16246	0.99
TAS2R42	-1.67	1	-1.5	0.0663	979	0.978	0.934	16245	0.99
TRIM5	-3.33	4	-1.5	0.0663	980	0.978	0.934	16244	0.99
RAD23A	-4.08	6	-1.5	0.0664	981	0.978	0.934	16243	0.99
TOP1	-4.08	6	-1.5	0.0664	982	0.978	0.934	16242	0.99
CLDN14	-4.08	6	-1.5	0.0664	983	0.978	0.934	16241	0.99
HEXA	-4.08	6	-1.5	0.0665	984	0.978	0.933	16240	0.99
CACNA1F	-4.07	6	-1.5	0.0667	985	0.978	0.933	16239	0.99
WDR33	-3.72	5	-1.5	0.0667	986	0.978	0.933	16238	0.99
NMT1	-4.07	6	-1.5	0.0668	987	0.978	0.933	16237	0.99
SAT1	-2.88	3	-1.5	0.0669	988	0.978	0.933	16236	0.99
FAM126B	-4.07	6	-1.5	0.0671	989	0.978	0.933	16235	0.99
STAG1	-4.06	6	-1.5	0.0672	990	0.978	0.933	16234	0.99
ITFG3	-4.06	6	-1.5	0.0673	991	0.978	0.933	16233	0.99
NCL	-4.06	6	-1.5	0.0674	992	0.978	0.933	16232	0.99
DNM2	-3.71	5	-1.5	0.0674	993	0.978	0.933	16231	0.99
SDCBP	-2.34	2	-1.49	0.0675	994	0.978	0.932	16230	0.99
CNOT7	-2.34	2	-1.49	0.0675	995	0.978	0.932	16229	0.99
TMEM108	-4.06	6	-1.49	0.0676	996	0.978	0.932	16228	0.99
PILRA	-3.31	4	-1.49	0.0676	997	0.978	0.932	16227	0.99
KCNIP1	-4.06	6	-1.49	0.0676	998	0.978	0.932	16226	0.99
PPP1R3D	-4.05	6	-1.49	0.0676	999	0.978	0.932	16225	0.99
OLFM2	-4.05	6	-1.49	0.0677	1000	0.978	0.932	16224	0.99
RCAN1	-4.05	6	-1.49	0.0678	1001	0.978	0.932	16223	0.99
DNAL1	-3.7	5	-1.49	0.0678	1002	0.978	0.932	16222	0.99
NOL12	-4.05	6	-1.49	0.0678	1003	0.978	0.932	16221	0.99
USP18	-1.65	1	-1.49	0.0678	1004	0.978	0.932	16220	0.99
HIST1H4I	-2.86	3	-1.49	0.0679	1005	0.978	0.932	16219	0.99
GPR162	-4.05	6	-1.49	0.0679	1006	0.978	0.932	16218	0.99
NUDT16L1	-4.05	6	-1.49	0.0679	1007	0.978	0.932	16217	0.99
KHDRBS2	-4.05	6	-1.49	0.068	1008	0.978	0.932	16216	0.99
STK24	-1.65	1	-1.49	0.068	1009	0.978	0.932	16215	0.99
JDP2	-3.3	4	-1.49	0.068	1010	0.978	0.932	16214	0.99
MCCC1	-4.05	6	-1.49	0.0681	1011	0.978	0.932	16213	0.99
TMEM132E	-4.04	6	-1.49	0.0683	1012	0.978	0.932	16212	0.99
TRIM26	-4.04	6	-1.49	0.0683	1013	0.978	0.932	16211	0.99
VSTM1	-3.69	5	-1.49	0.0684	1014	0.978	0.932	16210	0.99
ZNF831	-4.04	6	-1.49	0.0684	1015	0.978	0.932	16209	0.99
LGI1	-4.04	6	-1.49	0.0685	1016	0.978	0.932	16208	0.99
TFEC	-4.04	6	-1.49	0.0685	1017	0.978	0.931	16207	0.99
DLG3	-4.04	6	-1.49	0.0686	1018	0.978	0.931	16206	0.99
PAK4	-4.04	6	-1.49	0.0686	1019	0.978	0.931	16205	0.99
C19orf57	-4.04	6	-1.49	0.0686	1020	0.978	0.931	16204	0.99
FAM194B	-4.04	6	-1.49	0.0686	1021	0.978	0.931	16203	0.99
C4orf21	-4.04	6	-1.49	0.0686	1022	0.978	0.931	16202	0.99
DOK4	-4.04	6	-1.49	0.0686	1023	0.978	0.931	16201	0.99
ANKS1B	-4.03	6	-1.48	0.0688	1024	0.978	0.931	16200	0.99
OR52D1	-3.68	5	-1.48	0.0689	1025	0.978	0.931	16199	0.99
TXNIP	-4.03	6	-1.48	0.0689	1026	0.978	0.931	16198	0.99
ZIK1	-3.29	4	-1.48	0.069	1027	0.978	0.931	16197	0.99
CASP6	-4.03	6	-1.48	0.069	1028	0.978	0.931	16196	0.99
SPAG8	-4.03	6	-1.48	0.0691	1029	0.978	0.931	16195	0.99
ABAT	-4.02	6	-1.48	0.0692	1030	0.978	0.931	16194	0.99
ACVRL1	-4.02	6	-1.48	0.0692	1031	0.978	0.931	16193	0.99
PIK3AP1	-4.02	6	-1.48	0.0693	1032	0.978	0.931	16192	0.99
MKKS	-4.02	6	-1.48	0.0693	1033	0.978	0.931	16191	0.99
OR4D11	-2.84	3	-1.48	0.0695	1034	0.978	0.931	16190	0.99
IL12A	-3.67	5	-1.48	0.0695	1035	0.978	0.93	16189	0.99
MED7	-2.84	3	-1.48	0.0695	1036	0.978	0.93	16188	0.99
MAN2A2	-4.02	6	-1.48	0.0696	1037	0.978	0.93	16187	0.99
DUS3L	-4.02	6	-1.48	0.0697	1038	0.978	0.93	16186	0.99
ZNF652	-3.66	5	-1.48	0.0698	1039	0.978	0.93	16185	0.99
CD177	-3.66	5	-1.48	0.0698	1040	0.978	0.93	16184	0.99
SLC35B2	-4.01	6	-1.48	0.0699	1041	0.978	0.93	16183	0.99
FMR1	-4.01	6	-1.48	0.07	1042	0.978	0.93	16182	0.99
SERPINA9	-4.01	6	-1.48	0.07	1043	0.978	0.93	16181	0.99
MASP2	-4.01	6	-1.48	0.07	1044	0.978	0.93	16180	0.99
REEP5	-4.01	6	-1.48	0.0701	1045	0.978	0.93	16179	0.99
SZT2	-4.01	6	-1.47	0.0701	1046	0.978	0.93	16178	0.99
TRPV1	-4.01	6	-1.47	0.0701	1047	0.978	0.93	16177	0.99
LCN8	-4.01	6	-1.47	0.0701	1048	0.978	0.93	16176	0.99
CD69	-3.27	4	-1.47	0.0702	1049	0.978	0.93	16175	0.99
DNAJC12	-3.27	4	-1.47	0.0702	1050	0.978	0.93	16174	0.99
KALRN	-4	6	-1.47	0.0706	1051	0.978	0.929	16173	0.99
CAPS2	-2.83	3	-1.47	0.0706	1052	0.978	0.929	16172	0.99
KCNK1	-4	6	-1.47	0.0707	1053	0.978	0.929	16171	0.99
POLI	-3.65	5	-1.47	0.0707	1054	0.978	0.929	16170	0.99
TREX1	-3.65	5	-1.47	0.0708	1055	0.978	0.929	16169	0.99
TNS1	-3.99	6	-1.47	0.0709	1056	0.978	0.929	16168	0.99
ANKRD12	-3.99	6	-1.47	0.0709	1057	0.978	0.929	16167	0.99
CHRNB4	-3.99	6	-1.47	0.071	1058	0.978	0.929	16166	0.99
TMPRSS6	-3.99	6	-1.47	0.071	1059	0.978	0.929	16165	0.99
ATMIN	-2.82	3	-1.47	0.0711	1060	0.978	0.929	16164	0.99
CDK9	-2.82	3	-1.47	0.0711	1061	0.978	0.929	16163	0.99
ETS1	-3.99	6	-1.47	0.0713	1062	0.978	0.929	16162	0.99
C2orf53	-3.98	6	-1.47	0.0713	1063	0.978	0.929	16161	0.99
SEC61B	-2.3	2	-1.47	0.0713	1064	0.978	0.929	16160	0.99
C12orf45	-2.82	3	-1.47	0.0714	1065	0.978	0.929	16159	0.99
STRIP2	-3.98	6	-1.47	0.0714	1066	0.978	0.929	16158	0.99
ABT1	-3.98	6	-1.47	0.0714	1067	0.978	0.929	16157	0.99
ITCH	-3.98	6	-1.47	0.0715	1068	0.978	0.929	16156	0.99
MAGEB10	-3.63	5	-1.46	0.0715	1069	0.978	0.928	16155	0.99
CASQ1	-3.98	6	-1.46	0.0716	1070	0.978	0.928	16154	0.99
PF4V1	-1.62	1	-1.46	0.0716	1071	0.978	0.928	16153	0.99
TRMT2B	-3.98	6	-1.46	0.0717	1072	0.978	0.928	16152	0.99
KLK15	-3.98	6	-1.46	0.0717	1073	0.978	0.928	16151	0.99
LURAP1L	-3.24	4	-1.46	0.072	1074	0.978	0.928	16150	0.99
KCNMA1	-3.97	6	-1.46	0.072	1075	0.978	0.928	16149	0.99
MCHR2	-3.97	6	-1.46	0.0721	1076	0.978	0.928	16148	0.99
PHF2	-3.97	6	-1.46	0.0722	1077	0.978	0.928	16147	0.99
RPRM	-3.97	6	-1.46	0.0723	1078	0.978	0.928	16146	0.99
DRG2	-3.97	6	-1.46	0.0723	1079	0.978	0.928	16145	0.99
GPX8	-3.24	4	-1.46	0.0724	1080	0.978	0.928	16144	0.99
SYAP1	-3.96	6	-1.46	0.0725	1081	0.978	0.928	16143	0.99
SETD9	-2.8	3	-1.46	0.0725	1082	0.978	0.927	16142	0.99
TMEM201	-3.96	6	-1.46	0.0726	1083	0.978	0.927	16141	0.99
LRP2	-3.96	6	-1.46	0.0726	1084	0.978	0.927	16140	0.99
TTC33	-3.61	5	-1.46	0.0727	1085	0.978	0.927	16139	0.99
FBXO36	-3.23	4	-1.46	0.0727	1086	0.978	0.927	16138	0.99
IL17RC	-3.96	6	-1.46	0.0728	1087	0.978	0.927	16137	0.99
TXNDC12	-3.95	6	-1.45	0.0729	1088	0.978	0.927	16136	0.99
MCM6	-3.61	5	-1.45	0.0729	1089	0.978	0.927	16135	0.99
MRFAP1L1	-3.23	4	-1.45	0.073	1090	0.978	0.927	16134	0.99
PARD6A	-3.95	6	-1.45	0.0732	1091	0.978	0.927	16133	0.989
EFCAB14	-3.95	6	-1.45	0.0732	1092	0.978	0.927	16132	0.989
TBPL2	-3.6	5	-1.45	0.0733	1093	0.978	0.927	16131	0.989
TSPAN31	-3.22	4	-1.45	0.0733	1094	0.978	0.927	16130	0.989
TNS4	-3.95	6	-1.45	0.0733	1095	0.978	0.927	16129	0.989
KIAA1468	-3.95	6	-1.45	0.0734	1096	0.978	0.927	16128	0.989
CYBB	-3.94	6	-1.45	0.0734	1097	0.978	0.927	16127	0.989
GIGYF2	-3.94	6	-1.45	0.0735	1098	0.978	0.927	16126	0.989
KCTD16	-3.94	6	-1.45	0.0735	1099	0.978	0.927	16125	0.989
DNAJC17	-3.94	6	-1.45	0.0735	1100	0.978	0.927	16124	0.989
NWD1	-3.94	6	-1.45	0.0735	1101	0.978	0.926	16123	0.989
INSL5	-3.22	4	-1.45	0.0736	1102	0.978	0.926	16122	0.989
CRYGA	-3.94	6	-1.45	0.0737	1103	0.978	0.926	16121	0.989
WISP3	-3.94	6	-1.45	0.0738	1104	0.978	0.926	16120	0.989
TNFRSF14	-3.94	6	-1.45	0.0738	1105	0.978	0.926	16119	0.989
TRIM54	-3.94	6	-1.45	0.0739	1106	0.978	0.926	16118	0.989
SLC1A4	-3.94	6	-1.45	0.0739	1107	0.978	0.926	16117	0.989
NRP1	-3.93	6	-1.45	0.0741	1108	0.978	0.926	16116	0.989
FOXD1	-3.21	4	-1.45	0.0741	1109	0.978	0.926	16115	0.989
YIF1A	-3.93	6	-1.44	0.0743	1110	0.978	0.926	16114	0.989
SBSN	-3.92	6	-1.44	0.0745	1111	0.978	0.925	16113	0.989
CUX1	-3.92	6	-1.44	0.0746	1112	0.978	0.925	16112	0.989
EP400	-3.92	6	-1.44	0.0746	1113	0.978	0.925	16111	0.989
NELFB	-3.92	6	-1.44	0.0747	1114	0.978	0.925	16110	0.989
MAGEB1	-3.58	5	-1.44	0.0747	1115	0.978	0.925	16109	0.989
FGF11	-3.92	6	-1.44	0.0748	1116	0.978	0.925	16108	0.989
LRRC18	-3.92	6	-1.44	0.0748	1117	0.978	0.925	16107	0.989
ZSCAN1	-3.92	6	-1.44	0.0749	1118	0.978	0.925	16106	0.989
DYNC1LI2	-3.92	6	-1.44	0.0749	1119	0.978	0.925	16105	0.989
PTER	-3.92	6	-1.44	0.075	1120	0.978	0.925	16104	0.989
CPA4	-3.91	6	-1.44	0.0751	1121	0.978	0.925	16103	0.989
OS9	-3.91	6	-1.44	0.0751	1122	0.978	0.925	16102	0.989
GSG2	-3.91	6	-1.44	0.0751	1123	0.978	0.925	16101	0.989
MED21	-3.2	4	-1.44	0.0751	1124	0.978	0.925	16100	0.989
RPS24	-3.57	5	-1.44	0.0751	1125	0.978	0.925	16099	0.989
TXLNA	-3.91	6	-1.44	0.0751	1126	0.978	0.925	16098	0.989
FRMD4B	-3.91	6	-1.44	0.0752	1127	0.978	0.925	16097	0.989
GNAO1	-3.91	6	-1.44	0.0752	1128	0.978	0.925	16096	0.989
TMEM257	-1.6	1	-1.44	0.0753	1129	0.978	0.925	16095	0.989
SLBP	-3.57	5	-1.44	0.0755	1130	0.978	0.924	16094	0.989
EPHA1	-3.91	6	-1.44	0.0756	1131	0.978	0.924	16093	0.989
WFDC1	-3.9	6	-1.43	0.0758	1132	0.978	0.924	16092	0.989
PABPC3	-3.19	4	-1.43	0.0758	1133	0.978	0.924	16091	0.989
OR14I1	-3.56	5	-1.43	0.0759	1134	0.978	0.924	16090	0.989
SLC39A1	-3.9	6	-1.43	0.076	1135	0.978	0.924	16089	0.989
SYT10	-3.9	6	-1.43	0.0761	1136	0.978	0.924	16088	0.989
UQCRH	-1.59	1	-1.43	0.0762	1137	0.978	0.924	16087	0.989
AAGAB	-3.89	6	-1.43	0.0763	1138	0.978	0.924	16086	0.989
CHST14	-3.55	5	-1.43	0.0764	1139	0.978	0.924	16085	0.989
NYX	-3.55	5	-1.43	0.0766	1140	0.978	0.923	16084	0.989
SPINT3	-1.59	1	-1.43	0.0766	1141	0.978	0.923	16083	0.989
CHRDL2	-3.89	6	-1.43	0.0767	1142	0.978	0.923	16082	0.989
HEBP2	-3.88	6	-1.43	0.0767	1143	0.978	0.923	16081	0.989
SPIB	-3.88	6	-1.43	0.0768	1144	0.978	0.923	16080	0.989
NDUFAF5	-3.88	6	-1.43	0.0768	1145	0.978	0.923	16079	0.989
ADAMTS15	-3.88	6	-1.43	0.0768	1146	0.978	0.923	16078	0.989
FAM65B	-3.88	6	-1.43	0.0768	1147	0.978	0.923	16077	0.989
IL5	-2.24	2	-1.43	0.0768	1148	0.978	0.923	16076	0.989
DMAP1	-3.88	6	-1.43	0.0769	1149	0.978	0.923	16075	0.989
SYN1	-3.88	6	-1.43	0.077	1150	0.978	0.923	16074	0.989
PRDM5	-3.88	6	-1.43	0.077	1151	0.978	0.923	16073	0.989
ARL13B	-3.88	6	-1.43	0.0771	1152	0.978	0.923	16072	0.989
KIAA0020	-3.17	4	-1.42	0.0771	1153	0.978	0.923	16071	0.989
ADAM33	-3.88	6	-1.42	0.0772	1154	0.978	0.923	16070	0.989
C1orf109	-3.54	5	-1.42	0.0773	1155	0.978	0.923	16069	0.989
TRPV2	-3.87	6	-1.42	0.0773	1156	0.978	0.923	16068	0.989
ILF3	-3.87	6	-1.42	0.0774	1157	0.978	0.923	16067	0.989
TRIM62	-3.87	6	-1.42	0.0775	1158	0.978	0.922	16066	0.989
CD44	-3.87	6	-1.42	0.0776	1159	0.978	0.922	16065	0.989
MEOX1	-3.16	4	-1.42	0.0776	1160	0.978	0.922	16064	0.989
MARCH10	-3.87	6	-1.42	0.0777	1161	0.978	0.922	16063	0.989
ATP6V1E2	-3.16	4	-1.42	0.0779	1162	0.978	0.922	16062	0.989
TSTD1	-3.86	6	-1.42	0.078	1163	0.978	0.922	16061	0.989
SCGB1C1	-3.15	4	-1.42	0.0781	1164	0.978	0.922	16060	0.989
SF3B5	-3.15	4	-1.42	0.0782	1165	0.978	0.922	16059	0.989
SLC2A4RG	-3.86	6	-1.42	0.0783	1166	0.978	0.922	16058	0.989
TEKT2	-3.86	6	-1.42	0.0783	1167	0.978	0.922	16057	0.989
WIZ	-3.85	6	-1.42	0.0784	1168	0.978	0.922	16056	0.989
F8	-3.85	6	-1.42	0.0785	1169	0.978	0.922	16055	0.989
MMP23B	-2.22	2	-1.42	0.0785	1170	0.978	0.922	16054	0.989
MCOLN2	-3.85	6	-1.42	0.0785	1171	0.978	0.922	16053	0.989
PPAPDC1B	-3.85	6	-1.42	0.0785	1172	0.978	0.921	16052	0.989
LMAN2	-3.85	6	-1.42	0.0785	1173	0.978	0.921	16051	0.989
ZBTB8B	-3.85	6	-1.41	0.0786	1174	0.978	0.921	16050	0.989
CREB3L3	-3.85	6	-1.41	0.0786	1175	0.978	0.921	16049	0.989
RING1	-3.85	6	-1.41	0.0786	1176	0.978	0.921	16048	0.989
PDF	-3.85	6	-1.41	0.0788	1177	0.978	0.921	16047	0.989
PLG	-3.51	5	-1.41	0.0788	1178	0.978	0.921	16046	0.989
RALGAPA2	-3.85	6	-1.41	0.0789	1179	0.978	0.921	16045	0.989
TCP11L2	-3.85	6	-1.41	0.0789	1180	0.978	0.921	16044	0.989
PPP1R1B	-3.84	6	-1.41	0.079	1181	0.978	0.921	16043	0.989
TIFAB	-3.51	5	-1.41	0.0792	1182	0.978	0.921	16042	0.989
NCAM1	-3.84	6	-1.41	0.0793	1183	0.978	0.921	16041	0.989
SERPINB7	-3.84	6	-1.41	0.0794	1184	0.978	0.921	16040	0.989
DUSP1	-3.84	6	-1.41	0.0794	1185	0.978	0.921	16039	0.989
PIF1	-3.84	6	-1.41	0.0795	1186	0.978	0.921	16038	0.989
IGFBP1	-3.83	6	-1.41	0.0798	1187	0.978	0.92	16037	0.988
ZNF704	-3.83	6	-1.4	0.08	1188	0.978	0.92	16036	0.988
GRAMD1C	-3.83	6	-1.4	0.08	1189	0.978	0.92	16035	0.988
CSTF3	-3.49	5	-1.4	0.0802	1190	0.978	0.92	16034	0.988
PCDH18	-3.82	6	-1.4	0.0802	1191	0.978	0.92	16033	0.988
GDAP1	-3.82	6	-1.4	0.0802	1192	0.978	0.92	16032	0.988
CRYM	-3.82	6	-1.4	0.0803	1193	0.978	0.92	16031	0.988
NUCB2	-3.49	5	-1.4	0.0805	1194	0.978	0.92	16030	0.988
TMEM55B	-3.82	6	-1.4	0.0805	1195	0.978	0.919	16029	0.988
SYCE3	-2.7	3	-1.4	0.0808	1196	0.978	0.919	16028	0.988
PDE6A	-3.81	6	-1.4	0.0809	1197	0.978	0.919	16027	0.988
EMC4	-3.81	6	-1.4	0.0809	1198	0.978	0.919	16026	0.988
RABL5	-3.81	6	-1.4	0.081	1199	0.978	0.919	16025	0.988
ITPR3	-3.81	6	-1.4	0.081	1200	0.978	0.919	16024	0.988
WNK1	-3.81	6	-1.4	0.0811	1201	0.978	0.919	16023	0.988
ATP6AP1	-3.81	6	-1.4	0.0811	1202	0.978	0.919	16022	0.988
PIAS1	-3.81	6	-1.4	0.0811	1203	0.978	0.919	16021	0.988
HNRNPUL1	-3.81	6	-1.4	0.0811	1204	0.978	0.919	16020	0.988
GPR35	-3.47	5	-1.4	0.0812	1205	0.978	0.919	16019	0.988
TTC12	-3.81	6	-1.4	0.0812	1206	0.978	0.919	16018	0.988
DFNB31	-3.81	6	-1.4	0.0812	1207	0.978	0.919	16017	0.988
WNT7A	-3.81	6	-1.4	0.0812	1208	0.978	0.919	16016	0.988
KIAA0100	-3.8	6	-1.4	0.0814	1209	0.978	0.919	16015	0.988
TRERF1	-3.8	6	-1.4	0.0815	1210	0.978	0.918	16014	0.988
C18orf21	-3.47	5	-1.39	0.0816	1211	0.978	0.918	16013	0.988
ATAD3B	-1.55	1	-1.39	0.0816	1212	0.978	0.918	16012	0.988
CDH15	-3.8	6	-1.39	0.0817	1213	0.978	0.918	16011	0.988
CEP112	-3.8	6	-1.39	0.0818	1214	0.978	0.918	16010	0.988
NGFR	-3.8	6	-1.39	0.0818	1215	0.978	0.918	16009	0.988
DUSP5	-2.68	3	-1.39	0.082	1216	0.978	0.918	16008	0.988
CHRM4	-3.79	6	-1.39	0.082	1217	0.978	0.918	16007	0.988
DENND4C	-3.79	6	-1.39	0.082	1218	0.978	0.918	16006	0.988
ALOX15B	-3.79	6	-1.39	0.0821	1219	0.978	0.918	16005	0.988
MCHR1	-3.79	6	-1.39	0.0821	1220	0.978	0.918	16004	0.988
CLPP	-3.79	6	-1.39	0.0822	1221	0.978	0.918	16003	0.988
IFT27	-3.79	6	-1.39	0.0822	1222	0.978	0.918	16002	0.988
ATP5L	-2.19	2	-1.39	0.0822	1223	0.978	0.918	16001	0.988
ACSF2	-3.79	6	-1.39	0.0823	1224	0.978	0.918	16000	0.988
BBS9	-3.79	6	-1.39	0.0823	1225	0.978	0.918	15999	0.988
TMEM47	-3.09	4	-1.39	0.0823	1226	0.978	0.918	15998	0.988
WDR4	-3.79	6	-1.39	0.0824	1227	0.978	0.918	15997	0.988
GRIN2B	-3.79	6	-1.39	0.0824	1228	0.978	0.918	15996	0.988
FZR1	-3.78	6	-1.39	0.0826	1229	0.978	0.917	15995	0.988
PEX6	-3.78	6	-1.39	0.0826	1230	0.978	0.917	15994	0.988
SMNDC1	-2.18	2	-1.39	0.0826	1231	0.978	0.917	15993	0.988
CDK12	-3.78	6	-1.39	0.0828	1232	0.978	0.917	15992	0.988
ALAS2	-3.78	6	-1.39	0.0829	1233	0.978	0.917	15991	0.988
COG3	-3.78	6	-1.39	0.0829	1234	0.978	0.917	15990	0.988
RAI2	-3.08	4	-1.39	0.083	1235	0.978	0.917	15989	0.988
TUT1	-3.77	6	-1.38	0.0831	1236	0.978	0.917	15988	0.988
IQCB1	-3.44	5	-1.38	0.0831	1237	0.978	0.917	15987	0.988
C1orf162	-3.44	5	-1.38	0.0832	1238	0.978	0.917	15986	0.988
PHF7	-3.77	6	-1.38	0.0832	1239	0.978	0.917	15985	0.988
PAGR1	-3.77	6	-1.38	0.0834	1240	0.978	0.917	15984	0.988
PRKG2	-3.77	6	-1.38	0.0834	1241	0.978	0.917	15983	0.988
CXADR	-1.54	1	-1.38	0.0835	1242	0.978	0.916	15982	0.988
ZNF737	-1.54	1	-1.38	0.0837	1243	0.978	0.916	15981	0.988
MEIS2	-3.76	6	-1.38	0.0837	1244	0.978	0.916	15980	0.988
ENOSF1	-3.76	6	-1.38	0.0838	1245	0.978	0.916	15979	0.988
C5orf52	-3.76	6	-1.38	0.0839	1246	0.978	0.916	15978	0.987
CD70	-3.76	6	-1.38	0.084	1247	0.978	0.916	15977	0.987
MAGIX	-3.76	6	-1.38	0.0841	1248	0.978	0.916	15976	0.987
LENG8	-3.76	6	-1.38	0.0842	1249	0.978	0.916	15975	0.987
MRGBP	-3.76	6	-1.38	0.0842	1250	0.978	0.916	15974	0.987
TCF19	-3.75	6	-1.38	0.0842	1251	0.978	0.916	15973	0.987
CCDC97	-3.75	6	-1.38	0.0843	1252	0.978	0.916	15972	0.987
HSPB9	-3.43	5	-1.38	0.0844	1253	0.978	0.916	15971	0.987
CPEB1	-3.75	6	-1.38	0.0844	1254	0.978	0.916	15970	0.987
TNFAIP8L2	-3.42	5	-1.38	0.0845	1255	0.978	0.915	15969	0.987
EFCAB4A	-3.75	6	-1.37	0.0846	1256	0.978	0.915	15968	0.987
LRRC56	-3.75	6	-1.37	0.0847	1257	0.978	0.915	15967	0.987
PDCD2L	-3.75	6	-1.37	0.0848	1258	0.978	0.915	15966	0.987
WWC2	-3.75	6	-1.37	0.0848	1259	0.978	0.915	15965	0.987
PANX2	-3.75	6	-1.37	0.0848	1260	0.978	0.915	15964	0.987
CYB5R3	-3.75	6	-1.37	0.0848	1261	0.978	0.915	15963	0.987
CFDP1	-3.74	6	-1.37	0.0849	1262	0.978	0.915	15962	0.987
ZEB1	-3.74	6	-1.37	0.0849	1263	0.978	0.915	15961	0.987
BLOC1S3	-3.74	6	-1.37	0.0849	1264	0.978	0.915	15960	0.987
PTCHD4	-3.74	6	-1.37	0.085	1265	0.978	0.915	15959	0.987
PPARA	-3.74	6	-1.37	0.0851	1266	0.978	0.915	15958	0.987
PIP5K1A	-2.64	3	-1.37	0.0851	1267	0.978	0.915	15957	0.987
TASP1	-3.74	6	-1.37	0.0852	1268	0.978	0.915	15956	0.987
TEX101	-3.74	6	-1.37	0.0853	1269	0.978	0.915	15955	0.987
CPNE9	-3.74	6	-1.37	0.0854	1270	0.978	0.915	15954	0.987
BUB3	-3.05	4	-1.37	0.0855	1271	0.978	0.915	15953	0.987
GPR25	-3.41	5	-1.37	0.0855	1272	0.978	0.914	15952	0.987
GDE1	-3.73	6	-1.37	0.0856	1273	0.978	0.914	15951	0.987
ZNF853	-3.41	5	-1.37	0.0856	1274	0.978	0.914	15950	0.987
EMC6	-3.05	4	-1.37	0.0857	1275	0.978	0.914	15949	0.987
CDH23	-3.73	6	-1.37	0.0857	1276	0.978	0.914	15948	0.987
KIAA1009	-3.73	6	-1.37	0.0857	1277	0.978	0.914	15947	0.987
UFC1	-3.73	6	-1.37	0.0857	1278	0.978	0.914	15946	0.987
GBP7	-3.73	6	-1.37	0.086	1279	0.978	0.914	15945	0.987
ACAP2	-3.72	6	-1.37	0.086	1280	0.978	0.914	15944	0.987
LPCAT4	-3.72	6	-1.37	0.0861	1281	0.978	0.914	15943	0.987
MXD3	-3.72	6	-1.36	0.0864	1282	0.978	0.914	15942	0.987
OR1L3	-2.15	2	-1.36	0.0865	1283	0.978	0.914	15941	0.987
TUBGCP4	-3.71	6	-1.36	0.0868	1284	0.978	0.913	15940	0.987
SERINC1	-3.71	6	-1.36	0.0868	1285	0.978	0.913	15939	0.987
DNMT1	-3.71	6	-1.36	0.087	1286	0.978	0.913	15938	0.987
HOXC12	-3.71	6	-1.36	0.087	1287	0.978	0.913	15937	0.987
ENPP3	-3.71	6	-1.36	0.0871	1288	0.978	0.913	15936	0.987
SLC45A4	-3.71	6	-1.36	0.0872	1289	0.978	0.913	15935	0.987
HAP1	-3.71	6	-1.36	0.0872	1290	0.978	0.913	15934	0.987
DRP2	-3.71	6	-1.36	0.0872	1291	0.978	0.913	15933	0.987
SNAPC4	-3.38	5	-1.36	0.0872	1292	0.978	0.913	15932	0.987
ZKSCAN1	-3.71	6	-1.36	0.0873	1293	0.978	0.913	15931	0.987
RASD1	-3.7	6	-1.36	0.0873	1294	0.978	0.913	15930	0.987
FAIM	-2.14	2	-1.36	0.0873	1295	0.978	0.913	15929	0.987
TNFSF13B	-3.38	5	-1.36	0.0873	1296	0.978	0.913	15928	0.987
FHOD1	-3.7	6	-1.36	0.0874	1297	0.978	0.913	15927	0.987
RGS4	-3.7	6	-1.36	0.0875	1298	0.978	0.913	15926	0.987
HIST1H1A	-3.02	4	-1.36	0.0875	1299	0.978	0.912	15925	0.987
ZC3HAV1	-3.7	6	-1.36	0.0875	1300	0.978	0.912	15924	0.987
EPS8L3	-3.7	6	-1.36	0.0876	1301	0.978	0.912	15923	0.987
WEE1	-3.38	5	-1.36	0.0877	1302	0.978	0.912	15922	0.987
UBA6	-3.02	4	-1.35	0.0878	1303	0.978	0.912	15921	0.987
MSH2	-3.69	6	-1.35	0.0879	1304	0.978	0.912	15920	0.987
TNFSF12	-3.69	6	-1.35	0.088	1305	0.978	0.912	15919	0.987
IQSEC3	-3.69	6	-1.35	0.088	1306	0.978	0.912	15918	0.987
CHMP4B	-2.13	2	-1.35	0.088	1307	0.978	0.912	15917	0.987
ITGA10	-3.69	6	-1.35	0.0883	1308	0.978	0.912	15916	0.987
WFDC3	-3.69	6	-1.35	0.0883	1309	0.978	0.912	15915	0.987
CCNB1	-3.69	6	-1.35	0.0884	1310	0.978	0.912	15914	0.987
PCNXL3	-3.69	6	-1.35	0.0885	1311	0.978	0.912	15913	0.987
CYP2A13	-1.5	1	-1.35	0.0886	1312	0.978	0.911	15912	0.987
GPAA1	-3.68	6	-1.35	0.0888	1313	0.978	0.911	15911	0.986
ZNF385B	-3.68	6	-1.35	0.0888	1314	0.978	0.911	15910	0.986
KCTD13	-3.68	6	-1.35	0.089	1315	0.978	0.911	15909	0.986
POLQ	-3.68	6	-1.35	0.0891	1316	0.978	0.911	15908	0.986
KCTD5	-3	4	-1.35	0.0892	1317	0.978	0.911	15907	0.986
OVOL3	-3.67	6	-1.34	0.0896	1318	0.978	0.91	15906	0.986
RNF185	-2.99	4	-1.34	0.0896	1319	0.978	0.91	15905	0.986
GCN1L1	-3.67	6	-1.34	0.0897	1320	0.978	0.91	15904	0.986
UPP2	-3.66	6	-1.34	0.0898	1321	0.978	0.91	15903	0.986
CRB1	-3.66	6	-1.34	0.0898	1322	0.978	0.91	15902	0.986
PIGS	-3.66	6	-1.34	0.09	1323	0.978	0.91	15901	0.986
TAS2R46	-1.49	1	-1.34	0.09	1324	0.978	0.91	15900	0.986
ZACN	-3.66	6	-1.34	0.09	1325	0.978	0.91	15899	0.986
OR6M1	-2.59	3	-1.34	0.0903	1326	0.978	0.91	15898	0.986
LIPM	-3.66	6	-1.34	0.0904	1327	0.978	0.91	15897	0.986
ARMC6	-3.65	6	-1.34	0.0904	1328	0.978	0.91	15896	0.986
AGXT2	-3.65	6	-1.34	0.0905	1329	0.978	0.91	15895	0.985
GALNS	-3.65	6	-1.34	0.0906	1330	0.978	0.909	15894	0.985
DEF6	-3.65	6	-1.34	0.0907	1331	0.978	0.909	15893	0.985
KISS1R	-3.65	6	-1.34	0.0907	1332	0.978	0.909	15892	0.985
LSM4	-3.65	6	-1.34	0.0909	1333	0.978	0.909	15891	0.985
DIEXF	-3.64	6	-1.33	0.0912	1334	0.978	0.909	15890	0.985
QRICH1	-3.64	6	-1.33	0.0912	1335	0.978	0.909	15889	0.985
TBX2	-3.64	6	-1.33	0.0912	1336	0.978	0.909	15888	0.985
NUP37	-2.57	3	-1.33	0.0912	1337	0.978	0.909	15887	0.985
PKN3	-3.64	6	-1.33	0.0913	1338	0.978	0.909	15886	0.985
GAS2L2	-3.64	6	-1.33	0.0913	1339	0.978	0.909	15885	0.985
ZFAT	-3.64	6	-1.33	0.0913	1340	0.978	0.909	15884	0.985
TMEM33	-2.1	2	-1.33	0.0914	1341	0.978	0.909	15883	0.985
PMFBP1	-3.64	6	-1.33	0.0915	1342	0.978	0.909	15882	0.985
PSMC3IP	-3.64	6	-1.33	0.0915	1343	0.978	0.908	15881	0.985
NOC4L	-3.32	5	-1.33	0.0915	1344	0.978	0.908	15880	0.985
C19orf12	-2.97	4	-1.33	0.0916	1345	0.978	0.908	15879	0.985
XPO5	-3.63	6	-1.33	0.0918	1346	0.978	0.908	15878	0.985
MLN	-2.57	3	-1.33	0.0918	1347	0.978	0.908	15877	0.985
MKL1	-3.63	6	-1.33	0.0918	1348	0.978	0.908	15876	0.985
TCF12	-3.63	6	-1.33	0.0918	1349	0.978	0.908	15875	0.985
GCM2	-3.63	6	-1.33	0.0919	1350	0.978	0.908	15874	0.985
TMEM53	-3.63	6	-1.33	0.0919	1351	0.978	0.908	15873	0.985
VPS37C	-3.63	6	-1.33	0.0919	1352	0.978	0.908	15872	0.985
HSDL1	-3.63	6	-1.33	0.0919	1353	0.978	0.908	15871	0.985
IGF2BP2	-3.63	6	-1.33	0.0919	1354	0.978	0.908	15870	0.985
ARNTL	-3.63	6	-1.33	0.092	1355	0.978	0.908	15869	0.985
GLRB	-3.31	5	-1.33	0.0921	1356	0.978	0.908	15868	0.985
SRRT	-3.63	6	-1.33	0.0921	1357	0.978	0.908	15867	0.985
PLK4	-3.31	5	-1.33	0.0921	1358	0.978	0.908	15866	0.985
FBXL17	-3.63	6	-1.33	0.0922	1359	0.978	0.908	15865	0.985
THOC7	-1.48	1	-1.33	0.0922	1360	0.978	0.908	15864	0.985
RALGPS1	-3.62	6	-1.33	0.0923	1361	0.978	0.908	15863	0.985
SLC25A27	-3.62	6	-1.33	0.0923	1362	0.978	0.908	15862	0.985
RARG	-3.62	6	-1.33	0.0925	1363	0.978	0.908	15861	0.985
TSPAN3	-3.62	6	-1.32	0.0927	1364	0.978	0.907	15860	0.985
KDM4A	-3.62	6	-1.32	0.0928	1365	0.978	0.907	15859	0.985
SPAM1	-2.09	2	-1.32	0.0928	1366	0.978	0.907	15858	0.985
GLIS2	-3.62	6	-1.32	0.0928	1367	0.978	0.907	15857	0.985
NOM1	-3.62	6	-1.32	0.0929	1368	0.978	0.907	15856	0.985
WEE2	-3.62	6	-1.32	0.0929	1369	0.978	0.907	15855	0.985
BCAS1	-3.61	6	-1.32	0.0929	1370	0.978	0.907	15854	0.985
TMEM212	-3.3	5	-1.32	0.0932	1371	0.978	0.907	15853	0.985
ITPRIPL2	-3.3	5	-1.32	0.0932	1372	0.978	0.907	15852	0.985
GUSB	-3.61	6	-1.32	0.0933	1373	0.978	0.907	15851	0.985
KCNJ2	-3.61	6	-1.32	0.0934	1374	0.978	0.907	15850	0.985
TRIM37	-3.61	6	-1.32	0.0935	1375	0.978	0.907	15849	0.985
DNAL4	-3.61	6	-1.32	0.0935	1376	0.978	0.907	15848	0.985
FREM1	-3.61	6	-1.32	0.0935	1377	0.978	0.906	15847	0.985
LURAP1	-3.29	5	-1.32	0.0936	1378	0.978	0.906	15846	0.985
KLC4	-3.6	6	-1.32	0.0937	1379	0.978	0.906	15845	0.985
IDI1	-3.29	5	-1.32	0.0937	1380	0.978	0.906	15844	0.985
EMC7	-3.29	5	-1.32	0.0937	1381	0.978	0.906	15843	0.985
NCAPD3	-3.6	6	-1.32	0.0938	1382	0.978	0.906	15842	0.985
LYAR	-3.6	6	-1.32	0.0938	1383	0.978	0.906	15841	0.985
HOMER1	-3.29	5	-1.32	0.0939	1384	0.978	0.906	15840	0.985
PPIB	-3.6	6	-1.32	0.0939	1385	0.978	0.906	15839	0.985
MDH1	-2.55	3	-1.32	0.0939	1386	0.978	0.906	15838	0.985
OR2A25	-1.47	1	-1.32	0.094	1387	0.978	0.906	15837	0.985
REEP4	-3.6	6	-1.32	0.094	1388	0.978	0.906	15836	0.985
SMIM7	-2.08	2	-1.32	0.0941	1389	0.978	0.906	15835	0.985
MIIP	-3.59	6	-1.32	0.0942	1390	0.978	0.906	15834	0.985
RDX	-1.47	1	-1.31	0.0943	1391	0.978	0.906	15833	0.985
TAB3	-3.59	6	-1.31	0.0943	1392	0.978	0.906	15832	0.985
VAC14	-3.59	6	-1.31	0.0944	1393	0.978	0.906	15831	0.985
MYH9	-3.59	6	-1.31	0.0945	1394	0.978	0.905	15830	0.985
PIH1D1	-3.59	6	-1.31	0.0946	1395	0.978	0.905	15829	0.985
HEATR2	-3.59	6	-1.31	0.0946	1396	0.978	0.905	15828	0.985
ZBTB39	-3.28	5	-1.31	0.0946	1397	0.978	0.905	15827	0.985
GPD1	-3.59	6	-1.31	0.0946	1398	0.978	0.905	15826	0.985
DCAF12L1	-3.28	5	-1.31	0.0947	1399	0.978	0.905	15825	0.985
DNAJA3	-3.59	6	-1.31	0.0947	1400	0.978	0.905	15824	0.985
ALDH5A1	-3.59	6	-1.31	0.0948	1401	0.978	0.905	15823	0.985
FERMT3	-3.27	5	-1.31	0.0948	1402	0.978	0.905	15822	0.985
FN3K	-3.59	6	-1.31	0.0948	1403	0.978	0.905	15821	0.985
SPRR3	-2.07	2	-1.31	0.0949	1404	0.978	0.905	15820	0.985
SUMF2	-3.58	6	-1.31	0.095	1405	0.978	0.905	15819	0.985
SHISA3	-3.58	6	-1.31	0.095	1406	0.978	0.905	15818	0.985
TCN2	-3.58	6	-1.31	0.0952	1407	0.978	0.905	15817	0.985
GPR176	-3.58	6	-1.31	0.0952	1408	0.978	0.905	15816	0.985
SLC36A3	-3.58	6	-1.31	0.0953	1409	0.978	0.905	15815	0.985
SGTA	-3.58	6	-1.31	0.0953	1410	0.978	0.905	15814	0.985
DFNB59	-2.07	2	-1.31	0.0954	1411	0.978	0.905	15813	0.985
ST5	-3.58	6	-1.31	0.0954	1412	0.978	0.905	15812	0.985
TMEM68	-2.06	2	-1.31	0.0955	1413	0.978	0.905	15811	0.985
LYPD1	-3.58	6	-1.31	0.0955	1414	0.978	0.904	15810	0.985
RIC3	-3.57	6	-1.31	0.0956	1415	0.978	0.904	15809	0.985
COQ6	-3.57	6	-1.31	0.0958	1416	0.978	0.904	15808	0.985
PPT1	-3.57	6	-1.31	0.0958	1417	0.978	0.904	15807	0.985
GAP43	-2.92	4	-1.31	0.0958	1418	0.978	0.904	15806	0.985
OR10K1	-3.26	5	-1.31	0.0959	1419	0.978	0.904	15805	0.985
MTMR8	-3.57	6	-1.3	0.0961	1420	0.978	0.904	15804	0.985
BRI3BP	-3.57	6	-1.3	0.0961	1421	0.978	0.904	15803	0.985
ULBP1	-1.46	1	-1.3	0.0962	1422	0.978	0.904	15802	0.985
NLE1	-2.91	4	-1.3	0.0962	1423	0.978	0.904	15801	0.985
CIRH1A	-3.25	5	-1.3	0.0963	1424	0.978	0.904	15800	0.985
PRF1	-3.56	6	-1.3	0.0963	1425	0.978	0.904	15799	0.985
UBE2QL1	-3.56	6	-1.3	0.0964	1426	0.978	0.904	15798	0.985
TTC31	-3.56	6	-1.3	0.0965	1427	0.978	0.904	15797	0.985
SORBS2	-3.56	6	-1.3	0.0966	1428	0.978	0.903	15796	0.985
C1orf100	-2.05	2	-1.3	0.0967	1429	0.978	0.903	15795	0.985
CRNN	-3.56	6	-1.3	0.0968	1430	0.978	0.903	15794	0.985
PACS1	-3.55	6	-1.3	0.0969	1431	0.978	0.903	15793	0.985
MYRFL	-3.55	6	-1.3	0.0969	1432	0.978	0.903	15792	0.985
CT47B1	-2.05	2	-1.3	0.097	1433	0.978	0.903	15791	0.985
FAM151B	-3.55	6	-1.3	0.0972	1434	0.978	0.903	15790	0.985
BAI1	-3.55	6	-1.3	0.0972	1435	0.978	0.903	15789	0.985
ZNF606	-3.24	5	-1.3	0.0972	1436	0.978	0.903	15788	0.985
YEATS4	-2.05	2	-1.3	0.0973	1437	0.978	0.903	15787	0.985
ZFP92	-3.24	5	-1.3	0.0974	1438	0.978	0.903	15786	0.985
C1QTNF5	-3.24	5	-1.3	0.0974	1439	0.978	0.903	15785	0.985
YPEL4	-3.55	6	-1.3	0.0974	1440	0.978	0.903	15784	0.985
ZNF710	-3.55	6	-1.3	0.0974	1441	0.978	0.903	15783	0.985
WDR70	-2.51	3	-1.3	0.0974	1442	0.978	0.903	15782	0.985
EGR1	-3.55	6	-1.3	0.0974	1443	0.978	0.903	15781	0.985
PARVB	-3.55	6	-1.3	0.0975	1444	0.978	0.903	15780	0.985
HOXC6	-2.89	4	-1.3	0.0975	1445	0.978	0.903	15779	0.985
NODAL	-3.55	6	-1.3	0.0975	1446	0.978	0.902	15778	0.985
SYPL2	-3.55	6	-1.3	0.0975	1447	0.978	0.902	15777	0.985
TMEM74	-2.89	4	-1.3	0.0976	1448	0.978	0.902	15776	0.985
PRR23A	-1.45	1	-1.3	0.0976	1449	0.978	0.902	15775	0.985
GLB1L3	-3.54	6	-1.3	0.0976	1450	0.978	0.902	15774	0.985
MYL2	-3.54	6	-1.29	0.0977	1451	0.978	0.902	15773	0.985
HR	-3.54	6	-1.29	0.0977	1452	0.978	0.902	15772	0.985
FAM228B	-2.51	3	-1.29	0.0977	1453	0.978	0.902	15771	0.985
PIK3R1	-3.54	6	-1.29	0.0978	1454	0.978	0.902	15770	0.985
PRDM11	-3.54	6	-1.29	0.0979	1455	0.978	0.902	15769	0.985
PRSS38	-3.54	6	-1.29	0.0979	1456	0.978	0.902	15768	0.985
PHLDB1	-3.54	6	-1.29	0.098	1457	0.978	0.902	15767	0.985
CST2	-1.44	1	-1.29	0.098	1458	0.978	0.902	15766	0.985
ANKRD13B	-3.54	6	-1.29	0.0981	1459	0.978	0.902	15765	0.985
SH3GLB2	-3.54	6	-1.29	0.0981	1460	0.978	0.902	15764	0.985
MOG	-3.54	6	-1.29	0.0981	1461	0.978	0.902	15763	0.985
NUP35	-2.5	3	-1.29	0.0982	1462	0.978	0.902	15762	0.985
SETBP1	-3.53	6	-1.29	0.0983	1463	0.978	0.902	15761	0.985
PKHD1L1	-3.53	6	-1.29	0.0985	1464	0.978	0.902	15760	0.985
DLL1	-3.53	6	-1.29	0.0985	1465	0.978	0.902	15759	0.985
MAP2K5	-3.53	6	-1.29	0.0985	1466	0.978	0.901	15758	0.985
IL1RN	-3.53	6	-1.29	0.0986	1467	0.978	0.901	15757	0.985
KCNT1	-3.53	6	-1.29	0.0986	1468	0.978	0.901	15756	0.985
THRB	-3.53	6	-1.29	0.0987	1469	0.978	0.901	15755	0.985
ADAMTS6	-3.53	6	-1.29	0.0988	1470	0.978	0.901	15754	0.985
MT1M	-1.44	1	-1.29	0.099	1471	0.978	0.901	15753	0.985
KIRREL2	-3.52	6	-1.29	0.099	1472	0.978	0.901	15752	0.985
EPB41L4A	-3.52	6	-1.29	0.099	1473	0.978	0.901	15751	0.985
KRTAP29-1	-2.88	4	-1.29	0.0991	1474	0.978	0.901	15750	0.985
TRIM17	-3.52	6	-1.29	0.0991	1475	0.978	0.901	15749	0.985
EPPIN	-3.21	5	-1.29	0.0991	1476	0.978	0.901	15748	0.985
PARD6G	-3.52	6	-1.29	0.0991	1477	0.978	0.901	15747	0.985
ABI3BP	-3.52	6	-1.29	0.0992	1478	0.978	0.901	15746	0.985
BCL2L14	-3.52	6	-1.29	0.0993	1479	0.978	0.901	15745	0.985
RAP2A	-2.87	4	-1.29	0.0993	1480	0.978	0.901	15744	0.985
PPRC1	-3.52	6	-1.29	0.0993	1481	0.978	0.901	15743	0.985
OR13H1	-2.87	4	-1.29	0.0994	1482	0.978	0.901	15742	0.985
MYRF	-3.52	6	-1.28	0.0994	1483	0.978	0.901	15741	0.985
SLC35C2	-3.52	6	-1.28	0.0995	1484	0.978	0.901	15740	0.985
SURF2	-3.52	6	-1.28	0.0995	1485	0.978	0.9	15739	0.985
RDH14	-3.21	5	-1.28	0.0996	1486	0.978	0.9	15738	0.985
CHST13	-3.21	5	-1.28	0.0996	1487	0.978	0.9	15737	0.985
KCNA6	-3.21	5	-1.28	0.0996	1488	0.978	0.9	15736	0.985
PRIM1	-2.03	2	-1.28	0.0996	1489	0.978	0.9	15735	0.985
UGT8	-3.21	5	-1.28	0.0997	1490	0.978	0.9	15734	0.985
NR0B1	-3.51	6	-1.28	0.0998	1491	0.978	0.9	15733	0.985
MBTPS1	-3.51	6	-1.28	0.0998	1492	0.978	0.9	15732	0.985
FLYWCH2	-3.21	5	-1.28	0.0998	1493	0.978	0.9	15731	0.985
CSTF2	-3.51	6	-1.28	0.0999	1494	0.978	0.9	15730	0.985
ZNF397	-2.87	4	-1.28	0.0999	1495	0.978	0.9	15729	0.985
LIG4	-2.03	2	-1.28	0.1	1496	0.978	0.9	15728	0.985
PEX7	-3.2	5	-1.28	0.1	1497	0.978	0.9	15727	0.985
KRT83	-2.02	2	-1.28	0.1	1498	0.978	0.9	15726	0.985
HTR1B	-2.86	4	-1.28	0.1	1499	0.978	0.9	15725	0.985
HUWE1	-3.2	5	-1.28	0.1	1500	0.978	0.9	15724	0.985
YEATS2	-3.2	5	-1.28	0.1	1501	0.978	0.9	15723	0.985
CNBD2	-3.5	6	-1.28	0.1	1502	0.978	0.9	15722	0.985
PPP4C	-3.5	6	-1.28	0.1	1503	0.978	0.9	15721	0.985
ADAT1	-3.5	6	-1.28	0.1	1504	0.978	0.9	15720	0.985
PIAS4	-3.5	6	-1.28	0.101	1505	0.978	0.899	15719	0.985
CX3CL1	-3.2	5	-1.28	0.101	1506	0.978	0.899	15718	0.985
SYNPO2L	-3.5	6	-1.28	0.101	1507	0.978	0.899	15717	0.985
C8G	-3.5	6	-1.28	0.101	1508	0.978	0.899	15716	0.985
EIF2B2	-3.2	5	-1.28	0.101	1509	0.978	0.899	15715	0.985
NAF1	-3.5	6	-1.28	0.101	1510	0.978	0.899	15714	0.985
AIG1	-3.5	6	-1.28	0.101	1511	0.978	0.899	15713	0.985
SMYD1	-3.5	6	-1.28	0.101	1512	0.978	0.899	15712	0.985
VPS28	-3.5	6	-1.28	0.101	1513	0.978	0.899	15711	0.985
CIAO1	-2.85	4	-1.28	0.101	1514	0.978	0.899	15710	0.985
TXNDC2	-3.19	5	-1.28	0.101	1515	0.978	0.899	15709	0.985
LSM14B	-3.49	6	-1.28	0.101	1516	0.978	0.899	15708	0.985
CASC5	-3.49	6	-1.28	0.101	1517	0.978	0.899	15707	0.985
CYFIP2	-3.49	6	-1.27	0.101	1518	0.978	0.899	15706	0.985
KLHL22	-3.49	6	-1.27	0.101	1519	0.978	0.899	15705	0.985
TBP	-3.19	5	-1.27	0.101	1520	0.978	0.899	15704	0.985
C3orf38	-2.85	4	-1.27	0.101	1521	0.978	0.899	15703	0.985
SHARPIN	-3.49	6	-1.27	0.101	1522	0.978	0.899	15702	0.985
CELF4	-3.49	6	-1.27	0.101	1523	0.978	0.899	15701	0.985
MED10	-2.85	4	-1.27	0.101	1524	0.978	0.899	15700	0.985
CEP85	-3.49	6	-1.27	0.101	1525	0.978	0.899	15699	0.985
NPR2	-3.49	6	-1.27	0.101	1526	0.978	0.899	15698	0.985
GFI1	-3.49	6	-1.27	0.101	1527	0.978	0.899	15697	0.985
USHBP1	-3.18	5	-1.27	0.101	1528	0.978	0.899	15696	0.985
TRIM39	-3.49	6	-1.27	0.102	1529	0.978	0.898	15695	0.985
KCNJ6	-3.18	5	-1.27	0.102	1530	0.978	0.898	15694	0.985
EPHA7	-3.48	6	-1.27	0.102	1531	0.978	0.898	15693	0.985
CCDC170	-3.48	6	-1.27	0.102	1532	0.978	0.898	15692	0.985
ZNF879	-2.46	3	-1.27	0.102	1533	0.978	0.898	15691	0.985
AZI2	-2.01	2	-1.27	0.102	1534	0.978	0.898	15690	0.985
PRPS2	-3.48	6	-1.27	0.102	1535	0.978	0.898	15689	0.985
RNF41	-3.48	6	-1.27	0.102	1536	0.978	0.898	15688	0.985
SGTB	-2.84	4	-1.27	0.102	1537	0.978	0.898	15687	0.985
CXorf66	-2.84	4	-1.27	0.102	1538	0.978	0.898	15686	0.985
UBE2K	-2.84	4	-1.27	0.102	1539	0.978	0.898	15685	0.985
SCMH1	-3.48	6	-1.27	0.102	1540	0.978	0.898	15684	0.985
RPS27	-2.01	2	-1.27	0.102	1541	0.978	0.898	15683	0.985
CEACAM4	-2.46	3	-1.27	0.102	1542	0.978	0.898	15682	0.985
BPHL	-3.48	6	-1.27	0.102	1543	0.978	0.898	15681	0.985
MAEL	-3.48	6	-1.27	0.102	1544	0.978	0.898	15680	0.985
KRR1	-2.01	2	-1.27	0.102	1545	0.978	0.898	15679	0.985
NEMF	-3.48	6	-1.27	0.102	1546	0.978	0.898	15678	0.985
SPAG6	-3.47	6	-1.27	0.103	1547	0.978	0.897	15677	0.985
ZNF432	-2.45	3	-1.27	0.103	1548	0.978	0.897	15676	0.985
TBX18	-3.47	6	-1.27	0.103	1549	0.978	0.897	15675	0.985
RABGGTB	-3.17	5	-1.27	0.103	1550	0.978	0.897	15674	0.985
MAP2K4	-3.17	5	-1.27	0.103	1551	0.978	0.897	15673	0.985
TNFSF8	-2.45	3	-1.27	0.103	1552	0.978	0.897	15672	0.985
SNAI1	-3.16	5	-1.27	0.103	1553	0.978	0.897	15671	0.985
LIX1L	-3.47	6	-1.26	0.103	1554	0.978	0.897	15670	0.985
MTRF1L	-1.41	1	-1.26	0.103	1555	0.978	0.897	15669	0.985
CLEC10A	-3.46	6	-1.26	0.103	1556	0.978	0.897	15668	0.985
CDC73	-3.16	5	-1.26	0.103	1557	0.978	0.897	15667	0.985
ABCA12	-3.46	6	-1.26	0.103	1558	0.978	0.897	15666	0.985
P2RY1	-3.46	6	-1.26	0.103	1559	0.978	0.897	15665	0.985
OR52N2	-2.83	4	-1.26	0.103	1560	0.978	0.897	15664	0.985
HPCAL1	-2.83	4	-1.26	0.103	1561	0.978	0.897	15663	0.985
SLC35E3	-3.46	6	-1.26	0.103	1562	0.978	0.897	15662	0.985
C1QTNF3	-3.46	6	-1.26	0.103	1563	0.978	0.897	15661	0.985
WDR35	-3.46	6	-1.26	0.103	1564	0.978	0.897	15660	0.985
ATF5	-3.46	6	-1.26	0.104	1565	0.978	0.896	15659	0.985
RBP4	-3.46	6	-1.26	0.104	1566	0.978	0.896	15658	0.985
C1orf200	-2.44	3	-1.26	0.104	1567	0.978	0.896	15657	0.985
RTN4RL2	-3.45	6	-1.26	0.104	1568	0.978	0.896	15656	0.985
DBF4B	-3.45	6	-1.26	0.104	1569	0.978	0.896	15655	0.985
NKTR	-3.45	6	-1.26	0.104	1570	0.978	0.896	15654	0.985
GTF2F1	-3.45	6	-1.26	0.104	1571	0.978	0.896	15653	0.985
OSTF1	-3.15	5	-1.26	0.104	1572	0.978	0.896	15652	0.985
PTOV1	-3.45	6	-1.26	0.104	1573	0.978	0.896	15651	0.985
ZIC1	-3.45	6	-1.26	0.104	1574	0.978	0.896	15650	0.985
ZNF547	-1.41	1	-1.26	0.104	1575	0.978	0.896	15649	0.985
RALGPS2	-3.44	6	-1.26	0.104	1576	0.978	0.896	15648	0.985
SLAIN1	-3.44	6	-1.26	0.104	1577	0.978	0.896	15647	0.985
RAPGEF1	-3.44	6	-1.26	0.104	1578	0.978	0.896	15646	0.985
TRIM41	-3.44	6	-1.26	0.105	1579	0.978	0.895	15645	0.985
FAM171B	-3.44	6	-1.26	0.105	1580	0.978	0.895	15644	0.985
NAB2	-3.44	6	-1.26	0.105	1581	0.978	0.895	15643	0.985
PRKAG1	-3.44	6	-1.25	0.105	1582	0.978	0.895	15642	0.985
ANKLE1	-3.44	6	-1.25	0.105	1583	0.978	0.895	15641	0.985
NRG3	-3.44	6	-1.25	0.105	1584	0.978	0.895	15640	0.985
UBE2T	-2.81	4	-1.25	0.105	1585	0.978	0.895	15639	0.985
KRT33A	-2.43	3	-1.25	0.105	1586	0.978	0.895	15638	0.985
NUDT15	-1.4	1	-1.25	0.105	1587	0.978	0.895	15637	0.985
TMEM52	-3.43	6	-1.25	0.105	1588	0.978	0.895	15636	0.985
TAGLN3	-3.43	6	-1.25	0.105	1589	0.978	0.895	15635	0.985
TGFB1	-3.43	6	-1.25	0.105	1590	0.978	0.895	15634	0.985
HNRNPL	-1.4	1	-1.25	0.105	1591	0.978	0.895	15633	0.985
ECE2	-3.43	6	-1.25	0.105	1592	0.978	0.895	15632	0.985
ATP5D	-3.43	6	-1.25	0.105	1593	0.978	0.895	15631	0.985
KCND1	-3.43	6	-1.25	0.105	1594	0.978	0.895	15630	0.985
KATNA1	-3.43	6	-1.25	0.105	1595	0.978	0.895	15629	0.985
SPRN	-2.8	4	-1.25	0.105	1596	0.978	0.895	15628	0.985
CHGA	-3.43	6	-1.25	0.106	1597	0.978	0.894	15627	0.985
FAM168B	-3.43	6	-1.25	0.106	1598	0.978	0.894	15626	0.985
TNS3	-3.43	6	-1.25	0.106	1599	0.978	0.894	15625	0.985
PLIN5	-3.43	6	-1.25	0.106	1600	0.978	0.894	15624	0.985
ZBTB40	-3.43	6	-1.25	0.106	1601	0.978	0.894	15623	0.985
EPHX2	-3.43	6	-1.25	0.106	1602	0.978	0.894	15622	0.985
OR7G3	-1.98	2	-1.25	0.106	1603	0.978	0.894	15621	0.985
ECHDC3	-3.13	5	-1.25	0.106	1604	0.978	0.894	15620	0.985
HIST1H2AG	-1.4	1	-1.25	0.106	1605	0.978	0.894	15619	0.985
CDC7	-2.42	3	-1.25	0.106	1606	0.978	0.894	15618	0.985
FAM110A	-3.42	6	-1.25	0.106	1607	0.978	0.894	15617	0.985
KIAA1161	-3.12	5	-1.25	0.106	1608	0.978	0.894	15616	0.985
GAS6	-3.42	6	-1.25	0.106	1609	0.978	0.894	15615	0.985
MRGPRG	-3.12	5	-1.25	0.106	1610	0.978	0.894	15614	0.985
DNAJA4	-3.42	6	-1.25	0.106	1611	0.978	0.894	15613	0.985
TNFRSF18	-3.42	6	-1.25	0.106	1612	0.978	0.894	15612	0.985
ZNRD1	-3.42	6	-1.25	0.106	1613	0.978	0.894	15611	0.985
ARHGEF6	-3.42	6	-1.25	0.106	1614	0.978	0.894	15610	0.985
DEGS2	-3.42	6	-1.25	0.106	1615	0.978	0.894	15609	0.985
SOSTDC1	-2.42	3	-1.25	0.106	1616	0.978	0.894	15608	0.985
SAE1	-3.42	6	-1.25	0.107	1617	0.978	0.893	15607	0.985
EIF4ENIF1	-3.41	6	-1.25	0.107	1618	0.978	0.893	15606	0.985
DCDC2	-3.41	6	-1.24	0.107	1619	0.978	0.893	15605	0.985
SLC6A20	-3.41	6	-1.24	0.107	1620	0.978	0.893	15604	0.985
ZNF426	-3.41	6	-1.24	0.107	1621	0.978	0.893	15603	0.985
MSLNL	-3.41	6	-1.24	0.107	1622	0.978	0.893	15602	0.985
RBKS	-3.41	6	-1.24	0.107	1623	0.978	0.893	15601	0.985
XG	-2.41	3	-1.24	0.107	1624	0.978	0.893	15600	0.985
PEX14	-3.41	6	-1.24	0.107	1625	0.978	0.893	15599	0.985
SLC37A3	-3.41	6	-1.24	0.107	1626	0.978	0.893	15598	0.985
CREB1	-3.41	6	-1.24	0.107	1627	0.978	0.893	15597	0.985
RSL1D1	-2.41	3	-1.24	0.107	1628	0.978	0.893	15596	0.985
FBLN1	-3.4	6	-1.24	0.107	1629	0.978	0.893	15595	0.985
CDK2	-3.4	6	-1.24	0.108	1630	0.978	0.892	15594	0.985
TP63	-3.4	6	-1.24	0.108	1631	0.978	0.892	15593	0.985
SLC26A8	-3.4	6	-1.24	0.108	1632	0.978	0.892	15592	0.985
CTDSP1	-3.4	6	-1.24	0.108	1633	0.978	0.892	15591	0.985
UFD1L	-2.78	4	-1.24	0.108	1634	0.978	0.892	15590	0.985
PRSS57	-3.4	6	-1.24	0.108	1635	0.978	0.892	15589	0.985
LRRC41	-3.4	6	-1.24	0.108	1636	0.978	0.892	15588	0.985
COX11	-1.39	1	-1.24	0.108	1637	0.978	0.892	15587	0.985
PRDM8	-3.4	6	-1.24	0.108	1638	0.978	0.892	15586	0.985
NFATC3	-3.4	6	-1.24	0.108	1639	0.978	0.892	15585	0.985
BEX4	-2.77	4	-1.24	0.108	1640	0.978	0.892	15584	0.985
KHNYN	-3.4	6	-1.24	0.108	1641	0.978	0.892	15583	0.985
F12	-3.4	6	-1.24	0.108	1642	0.978	0.892	15582	0.985
OR52M1	-2.4	3	-1.24	0.108	1643	0.978	0.892	15581	0.985
HERC4	-3.39	6	-1.24	0.108	1644	0.978	0.892	15580	0.985
ZFPL1	-3.39	6	-1.24	0.108	1645	0.978	0.892	15579	0.985
CBX4	-3.39	6	-1.24	0.108	1646	0.978	0.892	15578	0.985
WNT7B	-3.39	6	-1.24	0.108	1647	0.978	0.892	15577	0.985
REV3L	-3.39	6	-1.23	0.109	1648	0.978	0.891	15576	0.985
VASH1	-3.38	6	-1.23	0.109	1649	0.978	0.891	15575	0.985
FAM193B	-3.38	6	-1.23	0.109	1650	0.978	0.891	15574	0.985
STX2	-3.38	6	-1.23	0.109	1651	0.978	0.891	15573	0.985
AJUBA	-3.38	6	-1.23	0.109	1652	0.978	0.891	15572	0.985
FBXO45	-2.76	4	-1.23	0.109	1653	0.978	0.891	15571	0.985
SREK1	-3.38	6	-1.23	0.109	1654	0.978	0.891	15570	0.985
NSFL1C	-3.08	5	-1.23	0.109	1655	0.978	0.891	15569	0.985
PRR3	-3.08	5	-1.23	0.109	1656	0.978	0.891	15568	0.985
ZCCHC12	-3.38	6	-1.23	0.109	1657	0.978	0.891	15567	0.985
ZNF559	-1.95	2	-1.23	0.109	1658	0.978	0.891	15566	0.985
SSTR2	-3.38	6	-1.23	0.109	1659	0.978	0.891	15565	0.985
TMOD1	-3.38	6	-1.23	0.109	1660	0.978	0.891	15564	0.985
BCOR	-3.38	6	-1.23	0.109	1661	0.978	0.891	15563	0.985
RRP12	-3.38	6	-1.23	0.109	1662	0.978	0.891	15562	0.985
KIAA1614	-3.37	6	-1.23	0.109	1663	0.978	0.891	15561	0.985
HCFC1R1	-2.76	4	-1.23	0.109	1664	0.978	0.891	15560	0.985
GBE1	-3.37	6	-1.23	0.109	1665	0.978	0.891	15559	0.985
LIPK	-3.37	6	-1.23	0.11	1666	0.978	0.89	15558	0.985
FZD9	-3.08	5	-1.23	0.11	1667	0.978	0.89	15557	0.985
TOPBP1	-3.37	6	-1.23	0.11	1668	0.978	0.89	15556	0.985
C17orf58	-1.38	1	-1.23	0.11	1669	0.978	0.89	15555	0.985
RAP1GAP	-3.37	6	-1.23	0.11	1670	0.978	0.89	15554	0.985
SCRN2	-3.37	6	-1.23	0.11	1671	0.978	0.89	15553	0.985
PPP4R4	-3.37	6	-1.23	0.11	1672	0.978	0.89	15552	0.985
HAGHL	-3.37	6	-1.23	0.11	1673	0.978	0.89	15551	0.985
IFT74	-3.37	6	-1.23	0.11	1674	0.978	0.89	15550	0.985
RBM38	-3.37	6	-1.23	0.11	1675	0.978	0.89	15549	0.985
RND2	-3.37	6	-1.23	0.11	1676	0.978	0.89	15548	0.985
TNFRSF8	-3.36	6	-1.23	0.11	1677	0.978	0.89	15547	0.985
ACIN1	-3.36	6	-1.23	0.11	1678	0.978	0.89	15546	0.985
SIAH3	-3.36	6	-1.22	0.111	1679	0.978	0.889	15545	0.985
DOCK6	-3.36	6	-1.22	0.111	1680	0.978	0.889	15544	0.985
ACOT6	-1.94	2	-1.22	0.111	1681	0.978	0.889	15543	0.985
BACH1	-3.36	6	-1.22	0.111	1682	0.978	0.889	15542	0.985
KIAA1598	-3.36	6	-1.22	0.111	1683	0.978	0.889	15541	0.985
UNC13C	-3.36	6	-1.22	0.111	1684	0.978	0.889	15540	0.985
MEIS1	-3.36	6	-1.22	0.111	1685	0.978	0.889	15539	0.985
ANAPC4	-3.06	5	-1.22	0.111	1686	0.978	0.889	15538	0.985
TMEM255A	-3.35	6	-1.22	0.111	1687	0.978	0.889	15537	0.985
ZNF670	-1.93	2	-1.22	0.111	1688	0.978	0.889	15536	0.985
TAF1	-3.35	6	-1.22	0.111	1689	0.978	0.889	15535	0.985
NCF1	-1.37	1	-1.22	0.112	1690	0.978	0.888	15534	0.985
OR6Q1	-2.36	3	-1.22	0.112	1691	0.978	0.888	15533	0.985
SYS1	-3.34	6	-1.22	0.112	1692	0.978	0.888	15532	0.985
ELP4	-3.05	5	-1.22	0.112	1693	0.978	0.888	15531	0.985
SFRP1	-3.34	6	-1.22	0.112	1694	0.978	0.888	15530	0.985
JRKL	-2.73	4	-1.22	0.112	1695	0.978	0.888	15529	0.985
RAB1B	-1.36	1	-1.22	0.112	1696	0.978	0.888	15528	0.985
MDK	-3.05	5	-1.22	0.112	1697	0.978	0.888	15527	0.985
CROT	-3.34	6	-1.22	0.112	1698	0.978	0.888	15526	0.985
RHOC	-3.34	6	-1.22	0.112	1699	0.978	0.888	15525	0.985
ERI1	-3.05	5	-1.22	0.112	1700	0.978	0.888	15524	0.985
GPC4	-3.34	6	-1.22	0.112	1701	0.978	0.888	15523	0.985
NGRN	-3.05	5	-1.21	0.112	1702	0.978	0.888	15522	0.985
PRCC	-3.34	6	-1.21	0.112	1703	0.978	0.888	15521	0.985
SCGB3A1	-2.36	3	-1.21	0.112	1704	0.978	0.888	15520	0.985
SHOX2	-3.34	6	-1.21	0.112	1705	0.978	0.888	15519	0.985
C2CD4B	-3.04	5	-1.21	0.112	1706	0.978	0.888	15518	0.985
GATAD2A	-3.33	6	-1.21	0.112	1707	0.978	0.888	15517	0.985
ADAMTS8	-3.33	6	-1.21	0.113	1708	0.978	0.887	15516	0.985
H2AFX	-2.36	3	-1.21	0.113	1709	0.978	0.887	15515	0.985
RTDR1	-3.33	6	-1.21	0.113	1710	0.978	0.887	15514	0.985
FAM84B	-3.04	5	-1.21	0.113	1711	0.978	0.887	15513	0.985
C4orf3	-3.33	6	-1.21	0.113	1712	0.978	0.887	15512	0.985
DMXL1	-3.33	6	-1.21	0.113	1713	0.978	0.887	15511	0.985
PHF19	-3.33	6	-1.21	0.113	1714	0.978	0.887	15510	0.985
CENPE	-3.04	5	-1.21	0.113	1715	0.978	0.887	15509	0.985
HRASLS	-3.33	6	-1.21	0.113	1716	0.978	0.887	15508	0.985
CCDC113	-3.33	6	-1.21	0.113	1717	0.978	0.887	15507	0.985
EXT1	-3.33	6	-1.21	0.113	1718	0.978	0.887	15506	0.985
CST3	-3.04	5	-1.21	0.113	1719	0.978	0.887	15505	0.985
FLYWCH1	-3.33	6	-1.21	0.113	1720	0.978	0.887	15504	0.985
OR1Q1	-1.36	1	-1.21	0.113	1721	0.978	0.887	15503	0.985
PSMG2	-2.72	4	-1.21	0.113	1722	0.978	0.887	15502	0.985
SEMA3G	-3.33	6	-1.21	0.113	1723	0.978	0.887	15501	0.985
RRM2B	-3.04	5	-1.21	0.113	1724	0.978	0.887	15500	0.985
RAB36	-3.32	6	-1.21	0.113	1725	0.978	0.887	15499	0.985
CHFR	-3.32	6	-1.21	0.113	1726	0.978	0.887	15498	0.985
RPF1	-2.71	4	-1.21	0.113	1727	0.978	0.887	15497	0.985
DIMT1	-3.32	6	-1.21	0.114	1728	0.978	0.886	15496	0.985
SCN2A	-3.32	6	-1.21	0.114	1729	0.978	0.886	15495	0.985
FBXO33	-3.32	6	-1.21	0.114	1730	0.978	0.886	15494	0.985
SLC6A14	-2.35	3	-1.21	0.114	1731	0.978	0.886	15493	0.985
FBXL12	-3.32	6	-1.21	0.114	1732	0.978	0.886	15492	0.985
SSNA1	-3.03	5	-1.21	0.114	1733	0.978	0.886	15491	0.985
GABPB1	-3.31	6	-1.21	0.114	1734	0.978	0.886	15490	0.985
TAS2R14	-1.35	1	-1.21	0.114	1735	0.978	0.886	15489	0.985
KIAA1279	-3.31	6	-1.21	0.114	1736	0.978	0.886	15488	0.985
SIGLEC11	-3.31	6	-1.21	0.114	1737	0.978	0.886	15487	0.985
POLR3C	-3.31	6	-1.2	0.114	1738	0.978	0.886	15486	0.985
OR51E2	-2.7	4	-1.2	0.114	1739	0.978	0.886	15485	0.985
LAGE3	-1.91	2	-1.2	0.114	1740	0.978	0.886	15484	0.985
TDP2	-3.31	6	-1.2	0.114	1741	0.978	0.886	15483	0.985
PDE1A	-3.31	6	-1.2	0.114	1742	0.978	0.886	15482	0.985
PRSS42	-3.31	6	-1.2	0.115	1743	0.978	0.885	15481	0.985
PDGFC	-3.31	6	-1.2	0.115	1744	0.978	0.885	15480	0.985
B4GALT1	-3.3	6	-1.2	0.115	1745	0.978	0.885	15479	0.985
BMI1	-1.91	2	-1.2	0.115	1746	0.978	0.885	15478	0.985
MB21D2	-3.3	6	-1.2	0.115	1747	0.978	0.885	15477	0.985
PPAPDC3	-3.3	6	-1.2	0.115	1748	0.978	0.885	15476	0.985
BAHD1	-3.3	6	-1.2	0.115	1749	0.978	0.885	15475	0.985
SMC5	-3.02	5	-1.2	0.115	1750	0.978	0.885	15474	0.985
LMOD1	-3.3	6	-1.2	0.115	1751	0.978	0.885	15473	0.985
PUM2	-3.3	6	-1.2	0.115	1752	0.978	0.885	15472	0.985
PHOX2A	-3.3	6	-1.2	0.115	1753	0.978	0.885	15471	0.985
KRTAP24-1	-2.33	3	-1.2	0.115	1754	0.978	0.885	15470	0.985
WASF1	-3.3	6	-1.2	0.115	1755	0.978	0.885	15469	0.985
C3orf52	-3.01	5	-1.2	0.115	1756	0.978	0.885	15468	0.985
ARFGAP1	-3.3	6	-1.2	0.115	1757	0.978	0.885	15467	0.985
CYP39A1	-3.29	6	-1.2	0.115	1758	0.978	0.885	15466	0.985
COBL	-3.29	6	-1.2	0.115	1759	0.978	0.885	15465	0.985
SGSM3	-3.29	6	-1.2	0.116	1760	0.978	0.884	15464	0.985
PCGF2	-3.29	6	-1.2	0.116	1761	0.978	0.884	15463	0.985
BAZ1A	-3.29	6	-1.2	0.116	1762	0.978	0.884	15462	0.985
PNKP	-3.29	6	-1.2	0.116	1763	0.978	0.884	15461	0.985
CYP27A1	-3.29	6	-1.2	0.116	1764	0.978	0.884	15460	0.985
IFT88	-3.29	6	-1.2	0.116	1765	0.978	0.884	15459	0.985
C5orf38	-3.29	6	-1.2	0.116	1766	0.978	0.884	15458	0.985
EPHA4	-3.29	6	-1.2	0.116	1767	0.978	0.884	15457	0.985
OR13C3	-1.9	2	-1.2	0.116	1768	0.978	0.884	15456	0.985
ZNF689	-3.29	6	-1.2	0.116	1769	0.978	0.884	15455	0.985
CYP11A1	-3	5	-1.2	0.116	1770	0.978	0.884	15454	0.985
ZNF454	-3.29	6	-1.2	0.116	1771	0.978	0.884	15453	0.985
GYG2	-3.29	6	-1.2	0.116	1772	0.978	0.884	15452	0.985
ADH4	-3	5	-1.2	0.116	1773	0.978	0.884	15451	0.985
WDR81	-3.29	6	-1.2	0.116	1774	0.978	0.884	15450	0.985
HLA-DMA	-3.29	6	-1.2	0.116	1775	0.978	0.884	15449	0.985
ARSB	-3.28	6	-1.19	0.116	1776	0.978	0.884	15448	0.985
RGR	-3.28	6	-1.19	0.116	1777	0.978	0.884	15447	0.985
RTKN	-3.28	6	-1.19	0.116	1778	0.978	0.884	15446	0.985
DSCC1	-2.68	4	-1.19	0.116	1779	0.978	0.884	15445	0.985
PRKCH	-3.28	6	-1.19	0.117	1780	0.978	0.883	15444	0.985
EGFLAM	-3.28	6	-1.19	0.117	1781	0.978	0.883	15443	0.985
ARRDC2	-3.28	6	-1.19	0.117	1782	0.978	0.883	15442	0.985
TRAF2	-3.28	6	-1.19	0.117	1783	0.978	0.883	15441	0.985
APOL2	-3.27	6	-1.19	0.117	1784	0.978	0.883	15440	0.985
DNAH8	-3.27	6	-1.19	0.117	1785	0.978	0.883	15439	0.985
LTA	-2.99	5	-1.19	0.117	1786	0.978	0.883	15438	0.985
POLE	-3.27	6	-1.19	0.117	1787	0.978	0.883	15437	0.985
C3orf37	-3.27	6	-1.19	0.117	1788	0.978	0.883	15436	0.985
GDI2	-1.34	1	-1.19	0.117	1789	0.978	0.883	15435	0.985
FGF3	-3.27	6	-1.19	0.117	1790	0.978	0.883	15434	0.985
IKBIP	-1.89	2	-1.19	0.117	1791	0.978	0.883	15433	0.985
ZNF740	-3.27	6	-1.19	0.117	1792	0.978	0.883	15432	0.985
C11orf31	-2.98	5	-1.19	0.117	1793	0.978	0.883	15431	0.985
C15orf62	-2.98	5	-1.19	0.118	1794	0.978	0.882	15430	0.985
PRICKLE3	-3.26	6	-1.19	0.118	1795	0.978	0.882	15429	0.985
ZDHHC13	-2.98	5	-1.19	0.118	1796	0.978	0.882	15428	0.985
CBR1	-3.26	6	-1.19	0.118	1797	0.978	0.882	15427	0.985
ZNF786	-3.26	6	-1.19	0.118	1798	0.978	0.882	15426	0.985
ARR3	-3.26	6	-1.19	0.118	1799	0.978	0.882	15425	0.985
XPR1	-3.26	6	-1.19	0.118	1800	0.978	0.882	15424	0.985
QRICH2	-3.26	6	-1.19	0.118	1801	0.978	0.882	15423	0.985
CCL21	-1.88	2	-1.19	0.118	1802	0.978	0.882	15422	0.985
NXT1	-2.31	3	-1.19	0.118	1803	0.978	0.882	15421	0.985
USP16	-3.26	6	-1.18	0.118	1804	0.978	0.882	15420	0.985
PNMA3	-3.26	6	-1.18	0.118	1805	0.978	0.882	15419	0.985
OGFRL1	-3.26	6	-1.18	0.118	1806	0.978	0.882	15418	0.985
TCTE3	-2.97	5	-1.18	0.118	1807	0.978	0.882	15417	0.985
ECM1	-3.26	6	-1.18	0.118	1808	0.978	0.882	15416	0.985
CCT8L2	-1.33	1	-1.18	0.118	1809	0.978	0.882	15415	0.985
SAMD4A	-3.25	6	-1.18	0.118	1810	0.978	0.882	15414	0.985
ECI1	-3.25	6	-1.18	0.118	1811	0.978	0.882	15413	0.985
COMTD1	-3.25	6	-1.18	0.119	1812	0.978	0.881	15412	0.985
MYLK2	-3.25	6	-1.18	0.119	1813	0.978	0.881	15411	0.985
DUSP14	-2.65	4	-1.18	0.119	1814	0.978	0.881	15410	0.985
SGPP1	-3.25	6	-1.18	0.119	1815	0.978	0.881	15409	0.985
PET100	-2.3	3	-1.18	0.119	1816	0.978	0.881	15408	0.985
ADCY6	-3.25	6	-1.18	0.119	1817	0.978	0.881	15407	0.985
NGB	-3.25	6	-1.18	0.119	1818	0.978	0.881	15406	0.985
SPAG17	-3.24	6	-1.18	0.119	1819	0.978	0.881	15405	0.985
SLC35G1	-3.24	6	-1.18	0.119	1820	0.978	0.881	15404	0.985
DZANK1	-3.24	6	-1.18	0.119	1821	0.978	0.881	15403	0.985
RETSAT	-3.24	6	-1.18	0.119	1822	0.978	0.881	15402	0.985
C1orf122	-2.96	5	-1.18	0.12	1823	0.978	0.88	15401	0.985
PRDM10	-3.24	6	-1.18	0.12	1824	0.978	0.88	15400	0.985
MMP28	-3.24	6	-1.18	0.12	1825	0.978	0.88	15399	0.985
TCF7L1	-3.24	6	-1.18	0.12	1826	0.978	0.88	15398	0.985
C1orf65	-3.24	6	-1.18	0.12	1827	0.978	0.88	15397	0.985
MPZL1	-1.87	2	-1.18	0.12	1828	0.978	0.88	15396	0.984
C9orf139	-3.23	6	-1.18	0.12	1829	0.978	0.88	15395	0.984
HOXD8	-3.23	6	-1.17	0.12	1830	0.978	0.88	15394	0.984
FASTK	-3.23	6	-1.17	0.12	1831	0.978	0.88	15393	0.984
TMEM130	-3.23	6	-1.17	0.12	1832	0.978	0.88	15392	0.984
ATOH1	-2.95	5	-1.17	0.12	1833	0.978	0.88	15391	0.984
TMEM208	-3.23	6	-1.17	0.12	1834	0.978	0.88	15390	0.984
OCSTAMP	-3.23	6	-1.17	0.12	1835	0.978	0.88	15389	0.984
SLC35F1	-3.23	6	-1.17	0.12	1836	0.978	0.88	15388	0.984
C9orf173	-3.23	6	-1.17	0.12	1837	0.978	0.88	15387	0.984
SDC4	-3.23	6	-1.17	0.12	1838	0.978	0.88	15386	0.984
ABCB5	-3.23	6	-1.17	0.121	1839	0.978	0.879	15385	0.984
VOPP1	-1.86	2	-1.17	0.121	1840	0.978	0.879	15384	0.984
IGHMBP2	-3.23	6	-1.17	0.121	1841	0.978	0.879	15383	0.984
IRF2BP1	-3.22	6	-1.17	0.121	1842	0.978	0.879	15382	0.984
CHPF2	-3.22	6	-1.17	0.121	1843	0.978	0.879	15381	0.984
CRYAB	-3.22	6	-1.17	0.121	1844	0.978	0.879	15380	0.984
SLCO2B1	-3.22	6	-1.17	0.121	1845	0.978	0.879	15379	0.984
CD5L	-3.22	6	-1.17	0.121	1846	0.978	0.879	15378	0.984
CORO6	-3.22	6	-1.17	0.121	1847	0.978	0.879	15377	0.984
TRDMT1	-3.22	6	-1.17	0.121	1848	0.978	0.879	15376	0.984
CPA5	-3.22	6	-1.17	0.121	1849	0.978	0.879	15375	0.984
NAA40	-3.22	6	-1.17	0.121	1850	0.978	0.879	15374	0.984
TPPP3	-2.63	4	-1.17	0.121	1851	0.978	0.879	15373	0.984
GTF3C3	-3.21	6	-1.17	0.121	1852	0.978	0.879	15372	0.984
OCEL1	-3.21	6	-1.17	0.122	1853	0.978	0.878	15371	0.984
CAMK2N1	-2.62	4	-1.17	0.122	1854	0.978	0.878	15370	0.984
RBCK1	-3.21	6	-1.17	0.122	1855	0.978	0.878	15369	0.984
RNF180	-3.21	6	-1.17	0.122	1856	0.978	0.878	15368	0.984
POLB	-3.21	6	-1.17	0.122	1857	0.978	0.878	15367	0.984
PPM1G	-3.21	6	-1.17	0.122	1858	0.978	0.878	15366	0.984
CTTNBP2NL	-2.62	4	-1.17	0.122	1859	0.978	0.878	15365	0.984
UTP18	-2.93	5	-1.17	0.122	1860	0.978	0.878	15364	0.984
STEAP3	-3.21	6	-1.17	0.122	1861	0.978	0.878	15363	0.984
DPAGT1	-3.21	6	-1.16	0.122	1862	0.978	0.878	15362	0.984
MXRA5	-3.2	6	-1.16	0.122	1863	0.978	0.878	15361	0.984
WDR37	-3.2	6	-1.16	0.122	1864	0.978	0.878	15360	0.984
STRADA	-3.2	6	-1.16	0.122	1865	0.978	0.878	15359	0.984
NTNG2	-3.2	6	-1.16	0.123	1866	0.978	0.877	15358	0.984
SEMA3A	-3.2	6	-1.16	0.123	1867	0.978	0.877	15357	0.984
EID2	-2.61	4	-1.16	0.123	1868	0.978	0.877	15356	0.984
GBP1	-1.31	1	-1.16	0.123	1869	0.978	0.877	15355	0.984
FAU	-1.85	2	-1.16	0.123	1870	0.978	0.877	15354	0.984
C4orf40	-2.26	3	-1.16	0.123	1871	0.978	0.877	15353	0.984
SLC25A42	-3.2	6	-1.16	0.123	1872	0.978	0.877	15352	0.984
ZMYND8	-3.19	6	-1.16	0.123	1873	0.978	0.877	15351	0.984
POLR2H	-2.61	4	-1.16	0.123	1874	0.978	0.877	15350	0.984
KCTD4	-2.92	5	-1.16	0.123	1875	0.978	0.877	15349	0.984
KIF1C	-3.19	6	-1.16	0.123	1876	0.978	0.877	15348	0.984
CRABP2	-3.19	6	-1.16	0.123	1877	0.978	0.877	15347	0.984
DUSP7	-3.19	6	-1.16	0.123	1878	0.978	0.877	15346	0.984
E4F1	-3.19	6	-1.16	0.123	1879	0.978	0.877	15345	0.984
ZNF562	-1.3	1	-1.16	0.123	1880	0.978	0.877	15344	0.984
FIGN	-3.19	6	-1.16	0.123	1881	0.978	0.877	15343	0.984
HMX2	-3.19	6	-1.16	0.123	1882	0.978	0.877	15342	0.984
ZNF408	-3.19	6	-1.16	0.123	1883	0.978	0.877	15341	0.984
GPRIN3	-2.91	5	-1.16	0.124	1884	0.978	0.876	15340	0.984
TCTN2	-3.19	6	-1.16	0.124	1885	0.978	0.876	15339	0.984
COX7B2	-1.3	1	-1.16	0.124	1886	0.978	0.876	15338	0.984
PIGT	-3.19	6	-1.16	0.124	1887	0.978	0.876	15337	0.984
C14orf119	-2.25	3	-1.16	0.124	1888	0.978	0.876	15336	0.984
OLA1	-1.3	1	-1.16	0.124	1889	0.978	0.876	15335	0.984
KIF7	-3.18	6	-1.16	0.124	1890	0.978	0.876	15334	0.984
GCFC2	-3.18	6	-1.16	0.124	1891	0.978	0.876	15333	0.984
KLK13	-3.18	6	-1.15	0.124	1892	0.978	0.876	15332	0.984
MUT	-3.18	6	-1.15	0.124	1893	0.978	0.876	15331	0.984
RNF7	-1.84	2	-1.15	0.124	1894	0.978	0.876	15330	0.984
TRIM3	-3.18	6	-1.15	0.124	1895	0.978	0.876	15329	0.984
RAPH1	-3.18	6	-1.15	0.124	1896	0.978	0.876	15328	0.984
FAM186A	-3.18	6	-1.15	0.125	1897	0.978	0.875	15327	0.984
KRTAP10-5	-1.3	1	-1.15	0.125	1898	0.978	0.875	15326	0.984
FAM50B	-3.17	6	-1.15	0.125	1899	0.978	0.875	15325	0.984
BCORL1	-3.17	6	-1.15	0.125	1900	0.978	0.875	15324	0.984
NDST1	-3.17	6	-1.15	0.125	1901	0.978	0.875	15323	0.984
ZHX1	-2.89	5	-1.15	0.125	1902	0.978	0.875	15322	0.984
PCDH17	-3.17	6	-1.15	0.125	1903	0.978	0.875	15321	0.984
CLEC11A	-3.17	6	-1.15	0.125	1904	0.978	0.875	15320	0.984
IGFALS	-2.89	5	-1.15	0.125	1905	0.978	0.875	15319	0.984
ZDHHC22	-3.17	6	-1.15	0.125	1906	0.978	0.875	15318	0.984
BTNL8	-3.16	6	-1.15	0.125	1907	0.978	0.875	15317	0.983
SNRNP70	-3.16	6	-1.15	0.126	1908	0.978	0.874	15316	0.983
WDR6	-3.16	6	-1.15	0.126	1909	0.978	0.874	15315	0.983
ATP13A4	-3.16	6	-1.15	0.126	1910	0.978	0.874	15314	0.983
BOLL	-3.16	6	-1.15	0.126	1911	0.978	0.874	15313	0.983
FLNC	-3.16	6	-1.15	0.126	1912	0.978	0.874	15312	0.983
TTC28	-3.16	6	-1.15	0.126	1913	0.978	0.874	15311	0.983
SF3B3	-3.16	6	-1.14	0.126	1914	0.978	0.874	15310	0.983
ZNF124	-2.23	3	-1.14	0.126	1915	0.978	0.874	15309	0.983
DAOA	-2.88	5	-1.14	0.126	1916	0.978	0.874	15308	0.983
GPR39	-3.16	6	-1.14	0.126	1917	0.978	0.874	15307	0.983
CCDC158	-3.16	6	-1.14	0.126	1918	0.978	0.874	15306	0.983
MBOAT2	-1.29	1	-1.14	0.126	1919	0.978	0.874	15305	0.983
PIWIL3	-3.15	6	-1.14	0.126	1920	0.978	0.874	15304	0.983
WDR76	-3.15	6	-1.14	0.127	1921	0.978	0.873	15303	0.983
CISH	-3.15	6	-1.14	0.127	1922	0.978	0.873	15302	0.983
IQCF2	-2.23	3	-1.14	0.127	1923	0.978	0.873	15301	0.983
ATG4B	-3.15	6	-1.14	0.127	1924	0.978	0.873	15300	0.983
RASL10A	-3.15	6	-1.14	0.127	1925	0.978	0.873	15299	0.983
TOLLIP	-3.15	6	-1.14	0.127	1926	0.978	0.873	15298	0.983
TSSC1	-3.15	6	-1.14	0.127	1927	0.978	0.873	15297	0.983
DARS	-2.87	5	-1.14	0.127	1928	0.978	0.873	15296	0.983
THEMIS	-2.87	5	-1.14	0.127	1929	0.978	0.873	15295	0.983
RTP2	-2.23	3	-1.14	0.127	1930	0.978	0.873	15294	0.983
UBE2L6	-3.15	6	-1.14	0.127	1931	0.978	0.873	15293	0.983
FBXO24	-3.15	6	-1.14	0.127	1932	0.978	0.873	15292	0.983
CMTM5	-3.15	6	-1.14	0.127	1933	0.978	0.873	15291	0.983
SLC7A6OS	-3.15	6	-1.14	0.127	1934	0.978	0.873	15290	0.983
GPX6	-3.15	6	-1.14	0.127	1935	0.978	0.873	15289	0.983
KIAA1210	-3.15	6	-1.14	0.127	1936	0.978	0.873	15288	0.983
CGN	-3.14	6	-1.14	0.127	1937	0.978	0.873	15287	0.983
MANF	-2.22	3	-1.14	0.127	1938	0.978	0.873	15286	0.983
UTP6	-3.14	6	-1.14	0.127	1939	0.978	0.873	15285	0.983
RASIP1	-3.14	6	-1.14	0.127	1940	0.978	0.873	15284	0.983
DPEP3	-3.14	6	-1.14	0.127	1941	0.978	0.873	15283	0.983
ZNF516	-3.14	6	-1.14	0.127	1942	0.978	0.873	15282	0.983
FBRSL1	-3.14	6	-1.14	0.127	1943	0.978	0.873	15281	0.983
SSUH2	-3.14	6	-1.14	0.127	1944	0.978	0.873	15280	0.983
MBD5	-3.14	6	-1.14	0.127	1945	0.978	0.873	15279	0.983
BCKDK	-3.14	6	-1.14	0.128	1946	0.978	0.872	15278	0.983
PRKCI	-2.22	3	-1.14	0.128	1947	0.978	0.872	15277	0.983
ANK3	-3.14	6	-1.14	0.128	1948	0.978	0.872	15276	0.983
NDUFS8	-3.13	6	-1.14	0.128	1949	0.978	0.872	15275	0.983
DBX1	-3.13	6	-1.14	0.128	1950	0.978	0.872	15274	0.983
TMPPE	-2.86	5	-1.14	0.128	1951	0.978	0.872	15273	0.983
IGF2R	-3.13	6	-1.14	0.128	1952	0.978	0.872	15272	0.983
MIF	-3.13	6	-1.13	0.128	1953	0.978	0.872	15271	0.983
ZYX	-3.13	6	-1.13	0.128	1954	0.978	0.872	15270	0.983
ZNF106	-3.13	6	-1.13	0.128	1955	0.978	0.872	15269	0.983
NICN1	-3.13	6	-1.13	0.128	1956	0.978	0.872	15268	0.983
ADCYAP1	-3.13	6	-1.13	0.128	1957	0.978	0.872	15267	0.983
MOB2	-3.13	6	-1.13	0.129	1958	0.978	0.871	15266	0.983
SPATA16	-2.85	5	-1.13	0.129	1959	0.978	0.871	15265	0.983
STRA13	-3.12	6	-1.13	0.129	1960	0.978	0.871	15264	0.983
CYP1A2	-3.12	6	-1.13	0.129	1961	0.978	0.871	15263	0.983
DCD	-2.85	5	-1.13	0.129	1962	0.978	0.871	15262	0.983
RAB5B	-2.85	5	-1.13	0.129	1963	0.978	0.871	15261	0.983
SYNJ2	-3.12	6	-1.13	0.129	1964	0.978	0.871	15260	0.983
ENPP6	-3.12	6	-1.13	0.129	1965	0.978	0.871	15259	0.983
NOXO1	-3.12	6	-1.13	0.129	1966	0.978	0.871	15258	0.983
ZNF202	-3.12	6	-1.13	0.129	1967	0.978	0.871	15257	0.983
HIGD2B	-2.2	3	-1.13	0.13	1968	0.978	0.87	15256	0.983
ZMYM1	-2.84	5	-1.13	0.13	1969	0.978	0.87	15255	0.983
NUPR1	-2.54	4	-1.13	0.13	1970	0.978	0.87	15254	0.983
AMD1	-1.27	1	-1.13	0.13	1971	0.978	0.87	15253	0.983
RAB12	-2.54	4	-1.13	0.13	1972	0.978	0.87	15252	0.983
IGLL5	-2.2	3	-1.13	0.13	1973	0.978	0.87	15251	0.983
C5orf46	-1.8	2	-1.13	0.13	1974	0.978	0.87	15250	0.983
ACVR1C	-3.11	6	-1.13	0.13	1975	0.978	0.87	15249	0.983
COL22A1	-3.11	6	-1.13	0.13	1976	0.978	0.87	15248	0.983
SNX33	-3.11	6	-1.13	0.13	1977	0.978	0.87	15247	0.983
EFNA3	-2.84	5	-1.13	0.13	1978	0.978	0.87	15246	0.983
TH	-3.1	6	-1.12	0.13	1979	0.978	0.87	15245	0.982
HOOK2	-3.1	6	-1.12	0.13	1980	0.978	0.87	15244	0.982
TMCC2	-3.1	6	-1.12	0.13	1981	0.978	0.87	15243	0.982
DAGLB	-3.1	6	-1.12	0.13	1982	0.978	0.87	15242	0.982
DEFB1	-1.27	1	-1.12	0.131	1983	0.978	0.869	15241	0.982
RNF8	-2.83	5	-1.12	0.131	1984	0.978	0.869	15240	0.982
MYEOV	-3.1	6	-1.12	0.131	1985	0.978	0.869	15239	0.982
SLC25A22	-3.1	6	-1.12	0.131	1986	0.978	0.869	15238	0.982
ACVR1B	-3.1	6	-1.12	0.131	1987	0.978	0.869	15237	0.982
RFC1	-3.1	6	-1.12	0.131	1988	0.978	0.869	15236	0.982
DPF3	-3.1	6	-1.12	0.131	1989	0.978	0.869	15235	0.982
C10orf35	-2.83	5	-1.12	0.131	1990	0.978	0.869	15234	0.982
PIGU	-3.1	6	-1.12	0.131	1991	0.978	0.869	15233	0.982
DHRS4	-1.79	2	-1.12	0.131	1992	0.978	0.869	15232	0.982
NUMB	-3.1	6	-1.12	0.131	1993	0.978	0.869	15231	0.982
SERTAD4	-2.53	4	-1.12	0.131	1994	0.978	0.869	15230	0.982
AURKA	-2.19	3	-1.12	0.131	1995	0.978	0.869	15229	0.982
TM6SF2	-3.1	6	-1.12	0.131	1996	0.978	0.869	15228	0.982
SYNGAP1	-3.1	6	-1.12	0.131	1997	0.978	0.869	15227	0.982
ZCCHC5	-2.83	5	-1.12	0.131	1998	0.978	0.869	15226	0.982
MKI67	-3.1	6	-1.12	0.131	1999	0.978	0.869	15225	0.982
[truncated: 15,224 more rows]

## Sheet: DrugZ T9 R1_R2
GENE	sumZ	numObs	normZ	pval_synth	rank_synth	fdr_synth	pval_supp	rank_supp	fdr_supp
ERCC8	-66.96	12	-17.52	4.99e-69	1	8.59e-65	1	17229	1
ERCC6	-55.39	12	-14.48	8.49e-48	2	7.31e-44	1	17228	1
UVSSA	-38.28	12	-9.97	9.84e-24	3	5.25e-20	1	17227	1
FANCF	-34.87	10	-9.95	1.22e-23	4	5.25e-20	1	17226	1
ESD	-30.4	8	-9.7	1.53e-22	5	5.04e-19	1	17225	1
ADH5	-21.47	4	-9.68	1.75e-22	6	5.04e-19	1	17224	1
ERCC5	-35.04	12	-9.12	3.68e-20	7	9.06e-17	1	17223	1
C19orf40	-26.73	12	-6.93	2.04e-12	8	4.39e-09	1	17222	1
CBFB	-25.91	12	-6.72	9.26e-12	9	1.77e-08	1	17221	1
FANCA	-25.82	12	-6.69	1.09e-11	10	1.88e-08	1	17220	1
FANCC	-24	12	-6.21	2.57e-10	11	4.03e-07	1	17219	1
EXO1	-23.9	12	-6.19	3.05e-10	12	4.37e-07	1	17218	1
C17orf70	-23.21	12	-6.01	9.35e-10	13	1.24e-06	1	17217	1
FANCG	-22.71	12	-5.88	2.1e-09	14	2.58e-06	1	17216	1
MED16	-22.07	12	-5.71	5.73e-09	15	6.58e-06	1	17215	1
PGBD3	-20.26	12	-5.23	8.42e-08	16	9.06e-05	1	17214	1
PPP2R4	-20.04	12	-5.17	1.15e-07	17	0.000116	1	17213	1
HSD17B12	-16.03	8	-5.07	2.02e-07	18	0.000185	1	17212	1
DAZAP1	-19.63	12	-5.07	2.04e-07	19	0.000185	1	17211	1
RFWD3	-19.43	12	-5.01	2.7e-07	20	0.000233	1	17210	1
FANCE	-19.29	12	-4.98	3.26e-07	21	0.000267	1	17209	1
BRIP1	-18.84	12	-4.86	5.92e-07	22	0.000464	1	17208	1
STIP1	-17.07	12	-4.39	5.65e-06	23	0.00423	1	17207	1
TNFRSF19	-16.62	12	-4.27	9.69e-06	24	0.00695	1	17206	1
FANCI	-16	12	-4.11	1.97e-05	25	0.0136	1	17205	1
SAMD1	-15.06	12	-3.86	5.58e-05	26	0.037	1	17204	1
TGFBR1	-14.73	12	-3.78	7.94e-05	27	0.0507	1	17203	1
ANKRD65	-14.57	12	-3.73	9.46e-05	28	0.0582	1	17202	1
RAD9A	-14.42	12	-3.69	0.000111	29	0.0658	1	17201	1
VCPIP1	-14.03	12	-3.59	0.000164	30	0.0941	1	17200	1
BBX	-13.83	12	-3.54	0.000202	31	0.112	1	17199	1
SLC16A6	-9.53	6	-3.44	0.000286	32	0.154	1	17198	1
SFMBT1	-13.42	12	-3.43	0.000301	33	0.157	1	17197	1
FANCB	-13.2	12	-3.37	0.000371	34	0.183	1	17196	1
MCM8	-13.2	12	-3.37	0.000372	35	0.183	1	17195	1
SIVA1	-12.88	12	-3.29	0.000503	36	0.241	0.999	17194	1
EID2	-10.44	8	-3.26	0.00055	37	0.252	0.999	17193	1
CDH4	-12.77	12	-3.26	0.000556	38	0.252	0.999	17192	1
FOXK1	-12.71	12	-3.24	0.000588	39	0.26	0.999	17191	1
RBBP8	-12.68	12	-3.24	0.000604	40	0.26	0.999	17190	1
IL17D	-11.51	10	-3.22	0.000649	41	0.273	0.999	17189	1
ANKRD32	-12.56	12	-3.2	0.000679	42	0.278	0.999	17188	1
COPS8	-5.1	2	-3.19	0.000713	43	0.283	0.999	17187	1
MSL3	-12.49	12	-3.19	0.000723	44	0.283	0.999	17186	1
DR1	-10.72	9	-3.16	0.000798	45	0.305	0.999	17185	1
ACTR5	-12.32	12	-3.14	0.00084	46	0.315	0.999	17184	1
GNMT	-12.13	12	-3.09	0.000998	47	0.358	0.999	17183	1
TXNDC17	-12.1	12	-3.08	0.00102	48	0.358	0.999	17182	1
UBE2O	-12.09	12	-3.08	0.00103	49	0.358	0.999	17181	1
DRAXIN	-12.07	12	-3.08	0.00105	50	0.358	0.999	17180	1
PRSS33	-12.06	12	-3.07	0.00106	51	0.358	0.999	17179	1
SMYD2	-11.96	12	-3.05	0.00116	52	0.385	0.999	17178	1
LRRC45	-11.91	12	-3.03	0.00121	53	0.392	0.999	17177	1
RAD1	-4.83	2	-3.01	0.00129	54	0.41	0.999	17176	1
FRYL	-11.74	12	-2.99	0.0014	55	0.439	0.999	17175	1
SLC17A7	-11.64	12	-2.96	0.00152	56	0.46	0.998	17174	1
OTUD5	-11.64	12	-2.96	0.00153	57	0.46	0.998	17173	1
RNF224	-10.61	10	-2.96	0.00155	58	0.46	0.998	17172	1
ZNF23	-8.18	6	-2.94	0.00163	59	0.46	0.998	17171	1
ADRB2	-11.55	12	-2.94	0.00165	60	0.46	0.998	17170	1
OR5J2	-6.66	4	-2.94	0.00167	61	0.46	0.998	17169	1
HCFC1R1	-9.41	8	-2.93	0.00168	62	0.46	0.998	17168	1
RPRD1B	-11.52	12	-2.93	0.00168	63	0.46	0.998	17167	1
SNRK	-11.48	12	-2.92	0.00174	64	0.469	0.998	17166	1
RECQL5	-11.45	12	-2.91	0.0018	65	0.477	0.998	17165	1
RNF4	-8.07	6	-2.9	0.00184	66	0.481	0.998	17164	1
TIMP4	-11.39	12	-2.9	0.00188	67	0.485	0.998	17163	1
SLC29A1	-11.36	12	-2.89	0.00193	68	0.488	0.998	17162	1
MAN2A2	-11.28	12	-2.87	0.00206	69	0.511	0.998	17161	1
TMEM120B	-11.28	12	-2.87	0.00207	70	0.511	0.998	17160	1
STK19	-11.23	12	-2.86	0.00215	71	0.521	0.998	17159	1
PDE10A	-11.18	12	-2.84	0.00224	72	0.537	0.998	17158	1
SHARPIN	-11.16	12	-2.84	0.00229	73	0.54	0.998	17157	1
CERS6	-11.1	12	-2.82	0.00241	74	0.558	0.998	17156	1
UXS1	-11.09	12	-2.82	0.00243	75	0.558	0.998	17155	1
OR10P1	-11.02	12	-2.8	0.00256	76	0.58	0.997	17154	1
NEUROG1	-7.78	6	-2.79	0.00261	77	0.581	0.997	17153	1
PPL	-10.98	12	-2.79	0.00264	78	0.581	0.997	17152	1
CIC	-10.97	12	-2.79	0.00267	79	0.581	0.997	17151	1
COL21A1	-10.95	12	-2.78	0.0027	80	0.581	0.997	17150	1
LURAP1	-9.99	10	-2.78	0.00274	81	0.582	0.997	17149	1
CDON	-10.9	12	-2.77	0.00283	82	0.594	0.997	17148	1
ANAPC15	-10.84	12	-2.75	0.00296	83	0.614	0.997	17147	1
USP42	-10.76	12	-2.73	0.00316	84	0.649	0.997	17146	1
OR11H6	-7.57	6	-2.72	0.00329	85	0.652	0.997	17145	1
TOMM7	-4.35	2	-2.7	0.00342	86	0.652	0.997	17144	1
DYRK1A	-10.65	12	-2.7	0.00344	87	0.652	0.997	17143	1
ERF	-10.64	12	-2.7	0.00346	88	0.652	0.997	17142	1
IQSEC3	-10.64	12	-2.7	0.00347	89	0.652	0.997	17141	1
JMJD7	-10.64	12	-2.7	0.00348	90	0.652	0.997	17140	1
ZNF641	-10.64	12	-2.7	0.00348	91	0.652	0.997	17139	1
PHC3	-10.64	12	-2.7	0.00348	92	0.652	0.997	17138	1
RAB25	-9.7	10	-2.7	0.00352	93	0.652	0.996	17137	1
OR6Q1	-7.46	6	-2.68	0.00372	94	0.681	0.996	17136	1
CHTF18	-10.54	12	-2.67	0.00376	95	0.683	0.996	17135	1
HELQ	-10.52	12	-2.67	0.00383	96	0.685	0.996	17134	1
SAP30BP	-10.51	12	-2.66	0.00386	97	0.685	0.996	17133	1
PLXNB3	-10.49	12	-2.66	0.00391	98	0.687	0.996	17132	1
SIN3B	-10.45	12	-2.65	0.00403	99	0.695	0.996	17131	1
NSUN5	-10.45	12	-2.65	0.00404	100	0.695	0.996	17130	1
LURAP1L	-8.5	8	-2.64	0.00417	101	0.712	0.996	17129	1
ZNF592	-10.39	12	-2.63	0.00424	102	0.715	0.996	17128	1
BTBD10	-9.45	10	-2.62	0.00433	103	0.725	0.996	17127	1
C19orf80	-10.33	12	-2.62	0.00444	104	0.728	0.996	17126	1
SNX15	-10.33	12	-2.62	0.00444	105	0.728	0.996	17125	1
FANCM	-10.27	12	-2.6	0.00464	106	0.754	0.995	17124	1
CSNK1G2	-10.24	12	-2.6	0.00473	107	0.757	0.995	17123	1
ANKRD11	-10.24	12	-2.59	0.00474	108	0.757	0.995	17122	1
CUL5	-10.22	12	-2.59	0.00482	109	0.76	0.995	17121	1
PIGT	-10.2	12	-2.58	0.00489	110	0.76	0.995	17120	1
FBXW11	-8.32	8	-2.58	0.00492	111	0.76	0.995	17119	1
AGR2	-7.18	6	-2.57	0.00505	112	0.76	0.995	17118	1
ARFGAP1	-10.16	12	-2.57	0.00506	113	0.76	0.995	17117	1
DDX39B	-10.14	12	-2.57	0.00511	114	0.76	0.995	17116	1
KRT38	-9.26	10	-2.57	0.00511	115	0.76	0.995	17115	1
TADA2B	-10.13	12	-2.56	0.00517	116	0.76	0.995	17114	1
IRX5	-10.12	12	-2.56	0.00519	117	0.76	0.995	17113	1
STXBP6	-10.12	12	-2.56	0.0052	118	0.76	0.995	17112	1
MARC2	-10.09	12	-2.56	0.0053	119	0.764	0.995	17111	1
C5orf48	-5.81	4	-2.55	0.0054	120	0.764	0.995	17110	1
LY75	-10.07	12	-2.55	0.00541	121	0.764	0.995	17109	1
MTHFR	-10.05	12	-2.54	0.00549	122	0.764	0.995	17108	1
KIAA0825	-10.04	12	-2.54	0.00551	123	0.764	0.994	17107	1
MED13	-10.03	12	-2.54	0.00554	124	0.764	0.994	17106	1
ATXN1L	-10.03	12	-2.54	0.00557	125	0.764	0.994	17105	1
SOLH	-10.02	12	-2.54	0.00559	126	0.764	0.994	17104	1
DNAJC21	-10.01	12	-2.53	0.00563	127	0.764	0.994	17103	1
LMBR1	-9.1	10	-2.52	0.00581	128	0.782	0.994	17102	1
FAM129A	-9.94	12	-2.51	0.00595	129	0.787	0.994	17101	1
ASB7	-9.07	10	-2.51	0.00597	130	0.787	0.994	17100	1
CMTM7	-9.93	12	-2.51	0.00601	131	0.787	0.994	17099	1
CELF2	-9.91	12	-2.51	0.00609	132	0.787	0.994	17098	1
MOB1A	-4.04	2	-2.51	0.00611	133	0.787	0.994	17097	1
RBBP7	-9.9	12	-2.51	0.00612	134	0.787	0.994	17096	1
PAIP1	-9.02	10	-2.5	0.00622	135	0.792	0.994	17095	1
PRDM12	-9.87	12	-2.5	0.00625	136	0.792	0.994	17094	1
RAB31	-8.97	10	-2.48	0.00648	137	0.809	0.994	17093	1
DUSP7	-9.81	12	-2.48	0.00653	138	0.809	0.993	17092	1
NAB2	-9.81	12	-2.48	0.00653	139	0.809	0.993	17091	1
SOCS4	-7.98	8	-2.47	0.00671	140	0.823	0.993	17090	1
GALNT12	-9.77	12	-2.47	0.00676	141	0.823	0.993	17089	1
ACTN3	-9.76	12	-2.47	0.00682	142	0.823	0.993	17088	1
CBX4	-9.74	12	-2.46	0.00689	143	0.823	0.993	17087	1
ACHE	-9.73	12	-2.46	0.00694	144	0.823	0.993	17086	1
OPN4	-9.72	12	-2.46	0.00701	145	0.823	0.993	17085	1
RRM2B	-8.86	10	-2.45	0.00707	146	0.823	0.993	17084	1
NDUFAF1	-3.96	2	-2.45	0.00709	147	0.823	0.993	17083	1
PTPLA	-6.85	6	-2.45	0.00713	148	0.823	0.993	17082	1
VAMP5	-7.91	8	-2.45	0.00718	149	0.823	0.993	17081	1
FNDC1	-9.68	12	-2.45	0.00719	150	0.823	0.993	17080	1
CRH	-7.9	8	-2.45	0.00722	151	0.823	0.993	17079	1
SLC7A11	-9.65	12	-2.44	0.00739	152	0.823	0.993	17078	1
LSM14A	-9.64	12	-2.44	0.0074	153	0.823	0.993	17077	1
TMEM229A	-9.64	12	-2.44	0.00742	154	0.823	0.993	17076	1
GRIN1	-9.64	12	-2.44	0.00743	155	0.823	0.993	17075	1
FAM167B	-8.79	10	-2.43	0.00746	156	0.823	0.993	17074	1
SWI5	-9.63	12	-2.43	0.0075	157	0.823	0.993	17073	1
CELF5	-9.61	12	-2.43	0.0076	158	0.826	0.992	17072	1
SENP8	-7.83	8	-2.42	0.0077	159	0.826	0.992	17071	1
IQCF1	-6.77	6	-2.42	0.00779	160	0.826	0.992	17070	1
AMBRA1	-9.57	12	-2.42	0.00781	161	0.826	0.992	17069	1
GORASP1	-9.56	12	-2.42	0.00784	162	0.826	0.992	17068	1
BTG2	-9.55	12	-2.41	0.0079	163	0.826	0.992	17067	1
CUX1	-9.54	12	-2.41	0.00797	164	0.826	0.992	17066	1
ARHGAP8	-9.54	12	-2.41	0.00799	165	0.826	0.992	17065	1
BPIFB6	-9.54	12	-2.41	0.008	166	0.826	0.992	17064	1
RNF111	-9.53	12	-2.41	0.00801	167	0.826	0.992	17063	1
PLA2R1	-9.53	12	-2.41	0.00807	168	0.827	0.992	17062	1
SUPT20H	-9.51	12	-2.4	0.00814	169	0.829	0.992	17061	1
SP6	-8.64	10	-2.39	0.00842	170	0.851	0.992	17060	1
ALKBH7	-9.45	12	-2.39	0.00849	171	0.851	0.992	17059	1
A1BG	-9.45	12	-2.39	0.00849	172	0.851	0.992	17058	1
TSPAN5	-7.7	8	-2.38	0.0086	173	0.857	0.991	17057	1
EFCC1	-9.4	12	-2.37	0.00884	174	0.874	0.991	17056	1
RETSAT	-9.39	12	-2.37	0.0089	175	0.874	0.991	17055	1
TCTE3	-8.56	10	-2.37	0.00896	176	0.874	0.991	17054	1
INHBA	-9.37	12	-2.37	0.00901	177	0.874	0.991	17053	1
PHF7	-9.37	12	-2.36	0.00903	178	0.874	0.991	17052	1
CHD1	-9.33	12	-2.36	0.00926	179	0.884	0.991	17051	1
AIFM3	-9.33	12	-2.35	0.00928	180	0.884	0.991	17050	1
EED	-8.51	10	-2.35	0.00931	181	0.884	0.991	17049	1
HIRA	-9.32	12	-2.35	0.00934	182	0.884	0.991	17048	1
PARP1	-9.24	12	-2.33	0.00987	183	0.923	0.99	17047	1
FOXQ1	-8.41	10	-2.32	0.01	184	0.923	0.99	17046	1
PDZRN4	-9.21	12	-2.32	0.0101	185	0.923	0.99	17045	1
PTBP1	-9.21	12	-2.32	0.0101	186	0.923	0.99	17044	1
C11orf30	-9.21	12	-2.32	0.0101	187	0.923	0.99	17043	1
JMJD6	-9.21	12	-2.32	0.0101	188	0.923	0.99	17042	1
GTF2E1	-9.19	12	-2.32	0.0102	189	0.923	0.99	17041	1
FAM221A	-9.19	12	-2.32	0.0102	190	0.923	0.99	17040	1
FANCD2	-9.18	12	-2.32	0.0103	191	0.923	0.99	17039	1
ADAMTS15	-9.16	12	-2.31	0.0104	192	0.923	0.99	17038	1
UBR5	-9.16	12	-2.31	0.0105	193	0.923	0.99	17037	1
SYNGR2	-7.47	8	-2.31	0.0105	194	0.923	0.99	17036	1
TBP	-8.35	10	-2.31	0.0105	195	0.923	0.989	17035	1
CCDC12	-9.14	12	-2.3	0.0106	196	0.923	0.989	17034	1
PDCL	-9.14	12	-2.3	0.0106	197	0.923	0.989	17033	1
COLEC11	-9.13	12	-2.3	0.0107	198	0.923	0.989	17032	1
GPAA1	-9.13	12	-2.3	0.0107	199	0.923	0.989	17031	1
UBR4	-9.12	12	-2.3	0.0107	200	0.923	0.989	17030	1
TOR4A	-8.29	10	-2.29	0.011	201	0.942	0.989	17029	1
CLPP	-9.08	12	-2.29	0.011	202	0.942	0.989	17028	1
XPC	-9.06	12	-2.28	0.0112	203	0.942	0.989	17027	1
RTN4RL1	-9.06	12	-2.28	0.0112	204	0.942	0.989	17026	1
SUPT3H	-6.41	6	-2.28	0.0112	205	0.942	0.989	17025	1
EPHA10	-9.03	12	-2.27	0.0115	206	0.951	0.989	17024	1
SLCO1C1	-9.02	12	-2.27	0.0115	207	0.951	0.988	17023	1
UMPS	-9.02	12	-2.27	0.0115	208	0.951	0.988	17022	1
DHRS7B	-9.01	12	-2.27	0.0116	209	0.951	0.988	17021	1
LEPROT	-5.2	4	-2.27	0.0116	210	0.951	0.988	17020	1
RAD21	-5.2	4	-2.27	0.0116	211	0.951	0.988	17019	1
PSME3	-8.98	12	-2.26	0.0118	212	0.957	0.988	17018	1
TIPRL	-7.33	8	-2.26	0.0118	213	0.957	0.988	17017	1
UIMC1	-8.96	12	-2.26	0.012	214	0.959	0.988	17016	1
ZNF311	-8.96	12	-2.26	0.012	215	0.959	0.988	17015	1
PLEKHJ1	-8.94	12	-2.25	0.0122	216	0.969	0.988	17014	1
HOXA1	-8.94	12	-2.25	0.0122	217	0.969	0.988	17013	1
GRID1	-8.91	12	-2.24	0.0124	218	0.978	0.988	17012	1
PPP1R3G	-8.9	12	-2.24	0.0125	219	0.978	0.988	17011	1
ZSCAN18	-8.88	12	-2.24	0.0127	220	0.978	0.987	17010	1
ZKSCAN1	-8.87	12	-2.23	0.0128	221	0.978	0.987	17009	1
C16orf72	-8.86	12	-2.23	0.0129	222	0.978	0.987	17008	1
C19orf25	-8.08	10	-2.23	0.0129	223	0.978	0.987	17007	1
TTC12	-8.84	12	-2.23	0.013	224	0.978	0.987	17006	1
C18orf25	-5.1	4	-2.23	0.013	225	0.978	0.987	17005	1
POLE3	-6.24	6	-2.22	0.0131	226	0.978	0.987	17004	1
TOPORS	-8.82	12	-2.22	0.0132	227	0.978	0.987	17003	1
FOXH1	-8.82	12	-2.22	0.0132	228	0.978	0.987	17002	1
SPOP	-8.81	12	-2.22	0.0133	229	0.978	0.987	17001	1
HMHA1	-8.81	12	-2.22	0.0133	230	0.978	0.987	17000	1
ADAM29	-7.19	8	-2.22	0.0134	231	0.978	0.987	16999	1
ESPNL	-8.79	12	-2.21	0.0135	232	0.978	0.987	16998	1
SMOC1	-8.78	12	-2.21	0.0135	233	0.978	0.986	16997	1
TK1	-8.78	12	-2.21	0.0135	234	0.978	0.986	16996	1
SNRPA	-8.77	12	-2.21	0.0136	235	0.978	0.986	16995	1
ACVR2A	-8.76	12	-2.21	0.0137	236	0.978	0.986	16994	1
DHRS7C	-8.75	12	-2.2	0.0139	237	0.978	0.986	16993	1
SEC11A	-3.57	2	-2.2	0.0139	238	0.978	0.986	16992	1
CX3CL1	-7.97	10	-2.2	0.014	239	0.978	0.986	16991	1
TMEM108	-8.73	12	-2.2	0.0141	240	0.978	0.986	16990	1
SLC25A22	-8.72	12	-2.19	0.0142	241	0.978	0.986	16989	1
CCS	-8.71	12	-2.19	0.0142	242	0.978	0.986	16988	1
CCDC103	-8.71	12	-2.19	0.0142	243	0.978	0.986	16987	1
MFSD10	-8.7	12	-2.19	0.0143	244	0.978	0.986	16986	1
GFAP	-8.68	12	-2.18	0.0145	245	0.978	0.986	16985	1
EPN3	-8.67	12	-2.18	0.0146	246	0.978	0.985	16984	1
CEACAM5	-7.07	8	-2.18	0.0147	247	0.978	0.985	16983	1
DIRAS1	-6.12	6	-2.18	0.0147	248	0.978	0.985	16982	1
GMEB1	-8.66	12	-2.18	0.0147	249	0.978	0.985	16981	1
VPRBP	-7.87	10	-2.17	0.015	250	0.978	0.985	16980	0.999
ASIC1	-8.61	12	-2.17	0.0151	251	0.978	0.985	16979	0.999
TNIP1	-8.6	12	-2.16	0.0153	252	0.978	0.985	16978	0.999
CCDC179	-3.51	2	-2.16	0.0153	253	0.978	0.985	16977	0.999
ATP2A1	-8.6	12	-2.16	0.0153	254	0.978	0.985	16976	0.999
UBN1	-8.59	12	-2.16	0.0153	255	0.978	0.985	16975	0.999
PAQR6	-8.58	12	-2.16	0.0155	256	0.978	0.985	16974	0.999
ODF3L2	-8.56	12	-2.15	0.0157	257	0.978	0.984	16973	0.999
ITIH6	-8.55	12	-2.15	0.0158	258	0.978	0.984	16972	0.999
ARPP21	-8.54	12	-2.15	0.0159	259	0.978	0.984	16971	0.999
SLC20A1	-8.53	12	-2.15	0.016	260	0.978	0.984	16970	0.999
MCHR2	-8.53	12	-2.14	0.016	261	0.978	0.984	16969	0.999
EHMT2	-8.52	12	-2.14	0.0161	262	0.978	0.984	16968	0.999
NLRP2	-8.5	12	-2.14	0.0163	263	0.978	0.984	16967	0.999
NUP133	-8.5	12	-2.14	0.0163	264	0.978	0.984	16966	0.999
PYDC1	-6.94	8	-2.13	0.0164	265	0.978	0.984	16965	0.999
L3MBTL3	-8.49	12	-2.13	0.0165	266	0.978	0.984	16964	0.999
PPAP2B	-8.49	12	-2.13	0.0165	267	0.978	0.984	16963	0.999
RAD52	-8.48	12	-2.13	0.0165	268	0.978	0.983	16962	0.999
DCAF4	-8.48	12	-2.13	0.0165	269	0.978	0.983	16961	0.999
CRISPLD2	-8.48	12	-2.13	0.0165	270	0.978	0.983	16960	0.999
SPSB3	-8.48	12	-2.13	0.0165	271	0.978	0.983	16959	0.999
ANKRD12	-8.48	12	-2.13	0.0165	272	0.978	0.983	16958	0.999
XG	-5.99	6	-2.13	0.0167	273	0.978	0.983	16957	0.999
EMC10	-8.47	12	-2.13	0.0167	274	0.978	0.983	16956	0.999
FANCL	-5.97	6	-2.12	0.0169	275	0.978	0.983	16955	0.999
CAPN1	-8.44	12	-2.12	0.017	276	0.978	0.983	16954	0.999
GFER	-8.42	12	-2.12	0.0172	277	0.978	0.983	16953	0.999
ZNF551	-6.87	8	-2.12	0.0172	278	0.978	0.983	16952	0.999
SCNM1	-8.41	12	-2.11	0.0173	279	0.978	0.983	16951	0.999
CACNG4	-8.39	12	-2.11	0.0175	280	0.978	0.982	16950	0.999
CDH15	-8.38	12	-2.1	0.0177	281	0.978	0.982	16949	0.999
SRSF5	-8.38	12	-2.1	0.0177	282	0.978	0.982	16948	0.999
ENO4	-8.37	12	-2.1	0.0178	283	0.978	0.982	16947	0.999
C12orf44	-8.37	12	-2.1	0.0178	284	0.978	0.982	16946	0.999
GCA	-8.37	12	-2.1	0.0178	285	0.978	0.982	16945	0.999
KIAA1598	-8.36	12	-2.1	0.0179	286	0.978	0.982	16944	0.999
FLNC	-8.35	12	-2.1	0.018	287	0.978	0.982	16943	0.999
GGN	-8.35	12	-2.1	0.0181	288	0.978	0.982	16942	0.999
N4BP1	-8.33	12	-2.09	0.0182	289	0.978	0.982	16941	0.998
UBE2Q1	-8.33	12	-2.09	0.0183	290	0.978	0.982	16940	0.998
ART3	-4.81	4	-2.09	0.0183	291	0.978	0.982	16939	0.998
OR6B3	-5.88	6	-2.09	0.0184	292	0.978	0.982	16938	0.998
JAG1	-8.32	12	-2.09	0.0184	293	0.978	0.982	16937	0.998
HPDL	-8.32	12	-2.09	0.0184	294	0.978	0.982	16936	0.998
GNA13	-8.31	12	-2.09	0.0185	295	0.978	0.982	16935	0.998
TMPRSS6	-8.31	12	-2.09	0.0185	296	0.978	0.981	16934	0.998
ADRA2C	-8.31	12	-2.09	0.0185	297	0.978	0.981	16933	0.998
TRAIP	-8.3	12	-2.08	0.0186	298	0.978	0.981	16932	0.998
CABIN1	-8.29	12	-2.08	0.0188	299	0.978	0.981	16931	0.998
NACAD	-8.28	12	-2.08	0.0188	300	0.978	0.981	16930	0.998
NAE1	-8.25	12	-2.07	0.0192	301	0.978	0.981	16929	0.998
TFIP11	-8.25	12	-2.07	0.0192	302	0.978	0.981	16928	0.998
CACNB3	-8.23	12	-2.07	0.0194	303	0.978	0.981	16927	0.998
C7orf73	-3.36	2	-2.06	0.0195	304	0.978	0.981	16926	0.998
RANBP3L	-6.71	8	-2.06	0.0196	305	0.978	0.98	16925	0.998
CCNYL1	-5.81	6	-2.06	0.0197	306	0.978	0.98	16924	0.998
OTX1	-8.21	12	-2.06	0.0197	307	0.978	0.98	16923	0.998
PKN3	-8.2	12	-2.06	0.0198	308	0.978	0.98	16922	0.998
GTF2H5	-3.35	2	-2.06	0.0198	309	0.978	0.98	16921	0.998
ZNF317	-8.2	12	-2.06	0.0198	310	0.978	0.98	16920	0.998
ARVCF	-8.2	12	-2.06	0.0199	311	0.978	0.98	16919	0.998
DNAH17	-8.19	12	-2.06	0.0199	312	0.978	0.98	16918	0.998
DEGS1	-7.47	10	-2.05	0.02	313	0.978	0.98	16917	0.998
PPP4R4	-8.19	12	-2.05	0.02	314	0.978	0.98	16916	0.998
KCTD7	-8.18	12	-2.05	0.0201	315	0.978	0.98	16915	0.998
CCDC27	-8.18	12	-2.05	0.0201	316	0.978	0.98	16914	0.998
SLC36A4	-7.47	10	-2.05	0.0201	317	0.978	0.98	16913	0.998
GPR148	-6.67	8	-2.05	0.0202	318	0.978	0.98	16912	0.998
A2ML1	-8.17	12	-2.05	0.0203	319	0.978	0.98	16911	0.998
PHF12	-8.15	12	-2.04	0.0204	320	0.978	0.98	16910	0.998
C2orf69	-6.66	8	-2.04	0.0205	321	0.978	0.98	16909	0.998
PLAC9	-4.7	4	-2.04	0.0205	322	0.978	0.979	16908	0.998
PELI2	-8.14	12	-2.04	0.0206	323	0.978	0.979	16907	0.998
DHX8	-8.14	12	-2.04	0.0206	324	0.978	0.979	16906	0.998
MTSS1L	-8.13	12	-2.04	0.0207	325	0.978	0.979	16905	0.998
C20orf96	-8.12	12	-2.04	0.0209	326	0.978	0.979	16904	0.998
SCAMP5	-8.12	12	-2.04	0.0209	327	0.978	0.979	16903	0.998
ZUFSP	-5.74	6	-2.04	0.0209	328	0.978	0.979	16902	0.998
SLC35B2	-8.11	12	-2.03	0.0209	329	0.978	0.979	16901	0.998
SLC29A4	-7.4	10	-2.03	0.0211	330	0.978	0.979	16900	0.998
ACOT7	-8.1	12	-2.03	0.0212	331	0.978	0.979	16899	0.998
PLEKHA2	-8.09	12	-2.03	0.0212	332	0.978	0.979	16898	0.998
NEK9	-8.08	12	-2.03	0.0213	333	0.978	0.979	16897	0.998
NAA60	-8.08	12	-2.03	0.0214	334	0.978	0.979	16896	0.998
DNAJC17	-8.08	12	-2.02	0.0215	335	0.978	0.979	16895	0.998
PHF8	-8.06	12	-2.02	0.0217	336	0.978	0.978	16894	0.998
C17orf85	-8.05	12	-2.02	0.0218	337	0.978	0.978	16893	0.998
RNF128	-8.04	12	-2.01	0.022	338	0.978	0.978	16892	0.998
ATG4B	-8.03	12	-2.01	0.0221	339	0.978	0.978	16891	0.998
BDH1	-8.03	12	-2.01	0.0221	340	0.978	0.978	16890	0.998
CHPF2	-8.03	12	-2.01	0.0221	341	0.978	0.978	16889	0.998
GSR	-8.03	12	-2.01	0.0221	342	0.978	0.978	16888	0.998
ALPI	-8.02	12	-2.01	0.0222	343	0.978	0.978	16887	0.998
CHMP4C	-7.32	10	-2.01	0.0223	344	0.978	0.978	16886	0.998
EMC3	-4.62	4	-2.01	0.0224	345	0.978	0.978	16885	0.998
MIIP	-8	12	-2	0.0225	346	0.978	0.977	16884	0.997
TAF5L	-7.98	12	-2	0.0228	347	0.978	0.977	16883	0.997
KALRN	-7.98	12	-2	0.0228	348	0.978	0.977	16882	0.997
ATP6AP1L	-7.97	12	-2	0.0229	349	0.978	0.977	16881	0.997
DTD2	-6.51	8	-2	0.0229	350	0.978	0.977	16880	0.997
HOXD11	-7.96	12	-1.99	0.023	351	0.978	0.977	16879	0.997
SUSD5	-7.95	12	-1.99	0.0233	352	0.978	0.977	16878	0.997
FGF23	-7.94	12	-1.99	0.0234	353	0.978	0.977	16877	0.997
DENND4A	-7.94	12	-1.99	0.0234	354	0.978	0.977	16876	0.997
KCNJ11	-7.92	12	-1.98	0.0236	355	0.978	0.976	16875	0.997
CIT	-7.92	12	-1.98	0.0237	356	0.978	0.976	16874	0.997
GLA	-7.92	12	-1.98	0.0237	357	0.978	0.976	16873	0.997
ABCC3	-7.9	12	-1.98	0.0239	358	0.978	0.976	16872	0.997
MED12	-7.9	12	-1.98	0.0239	359	0.978	0.976	16871	0.997
LHPP	-7.9	12	-1.98	0.0239	360	0.978	0.976	16870	0.997
SLC35G1	-7.9	12	-1.98	0.0239	361	0.978	0.976	16869	0.997
HDAC8	-7.9	12	-1.98	0.0239	362	0.978	0.976	16868	0.997
CLK3	-7.9	12	-1.98	0.024	363	0.978	0.976	16867	0.997
UBE2F	-5.58	6	-1.98	0.024	364	0.978	0.976	16866	0.997
GLYCTK	-7.89	12	-1.98	0.024	365	0.978	0.976	16865	0.997
SLC18A1	-7.89	12	-1.98	0.0241	366	0.978	0.976	16864	0.997
UBE2T	-6.44	8	-1.98	0.0241	367	0.978	0.976	16863	0.997
KLHL35	-7.89	12	-1.97	0.0242	368	0.978	0.976	16862	0.997
PNISR	-7.88	12	-1.97	0.0242	369	0.978	0.976	16861	0.997
GPR150	-7.19	10	-1.97	0.0243	370	0.978	0.976	16860	0.997
NTNG2	-7.87	12	-1.97	0.0243	371	0.978	0.976	16859	0.997
CTNNB1	-7.86	12	-1.97	0.0245	372	0.978	0.975	16858	0.997
ZNF654	-4.53	4	-1.97	0.0247	373	0.978	0.975	16857	0.997
ATAD5	-7.84	12	-1.96	0.0248	374	0.978	0.975	16856	0.997
C1orf27	-6.4	8	-1.96	0.025	375	0.978	0.975	16855	0.997
HUWE1	-7.5	11	-1.96	0.025	376	0.978	0.975	16854	0.997
SDK1	-7.82	12	-1.96	0.0252	377	0.978	0.975	16853	0.997
SRMS	-7.82	12	-1.96	0.0252	378	0.978	0.975	16852	0.997
SUV420H2	-7.8	12	-1.95	0.0254	379	0.978	0.975	16851	0.996
NOLC1	-7.8	12	-1.95	0.0255	380	0.978	0.975	16850	0.996
ANG	-5.52	6	-1.95	0.0255	381	0.978	0.975	16849	0.996
PTRH1	-7.79	12	-1.95	0.0257	382	0.978	0.974	16848	0.996
TP63	-7.78	12	-1.95	0.0258	383	0.978	0.974	16847	0.996
KIAA1009	-7.78	12	-1.95	0.0258	384	0.978	0.974	16846	0.996
DAZAP2	-5.49	6	-1.94	0.026	385	0.978	0.974	16845	0.996
CEP95	-7.76	12	-1.94	0.026	386	0.978	0.974	16844	0.996
SYT10	-7.76	12	-1.94	0.0261	387	0.978	0.974	16843	0.996
VEGFC	-7.76	12	-1.94	0.0262	388	0.978	0.974	16842	0.996
USP16	-7.75	12	-1.94	0.0262	389	0.978	0.974	16841	0.996
KLHDC10	-7.75	12	-1.94	0.0262	390	0.978	0.974	16840	0.996
DDX39A	-7.75	12	-1.94	0.0263	391	0.978	0.974	16839	0.996
MUS81	-7.75	12	-1.94	0.0263	392	0.978	0.974	16838	0.996
GMDS	-7.75	12	-1.94	0.0263	393	0.978	0.974	16837	0.996
TRAF3	-7.74	12	-1.94	0.0264	394	0.978	0.974	16836	0.996
RASSF4	-7.74	12	-1.94	0.0264	395	0.978	0.974	16835	0.996
EXOC3L4	-7.74	12	-1.94	0.0265	396	0.978	0.974	16834	0.996
RAD21L1	-4.46	4	-1.93	0.0267	397	0.978	0.973	16833	0.996
UBL4B	-6.3	8	-1.93	0.0267	398	0.978	0.973	16832	0.996
PDGFA	-7.72	12	-1.93	0.0268	399	0.978	0.973	16831	0.996
IGBP1	-4.46	4	-1.93	0.0268	400	0.978	0.973	16830	0.996
PABPC3	-6.3	8	-1.93	0.0268	401	0.978	0.973	16829	0.996
DOC2A	-7.71	12	-1.93	0.0269	402	0.978	0.973	16828	0.996
PRAM1	-7.71	12	-1.93	0.0269	403	0.978	0.973	16827	0.996
PHF14	-7.71	12	-1.93	0.027	404	0.978	0.973	16826	0.996
NR0B2	-7.7	12	-1.93	0.0271	405	0.978	0.973	16825	0.996
NKX2-4	-7.69	12	-1.92	0.0272	406	0.978	0.973	16824	0.996
MRC2	-7.69	12	-1.92	0.0273	407	0.978	0.973	16823	0.996
TAS1R1	-7.68	12	-1.92	0.0274	408	0.978	0.973	16822	0.996
RNASE10	-5.43	6	-1.92	0.0274	409	0.978	0.973	16821	0.996
CTSL2	-7.01	10	-1.92	0.0274	410	0.978	0.973	16820	0.996
BCKDK	-7.68	12	-1.92	0.0275	411	0.978	0.973	16819	0.996
OR6J1	-6.27	8	-1.92	0.0275	412	0.978	0.973	16818	0.996
OLFM2	-7.67	12	-1.92	0.0275	413	0.978	0.972	16817	0.996
EVC	-7.67	12	-1.92	0.0275	414	0.978	0.972	16816	0.996
FAM49A	-7.66	12	-1.92	0.0277	415	0.978	0.972	16815	0.996
DAGLB	-7.65	12	-1.91	0.028	416	0.978	0.972	16814	0.996
PLXNA2	-7.64	12	-1.91	0.028	417	0.978	0.972	16813	0.996
FZD3	-7.64	12	-1.91	0.028	418	0.978	0.972	16812	0.996
GZMK	-6.23	8	-1.91	0.0282	419	0.978	0.972	16811	0.996
PTGIS	-7.63	12	-1.91	0.0283	420	0.978	0.972	16810	0.996
ZBTB26	-4.4	4	-1.91	0.0283	421	0.978	0.972	16809	0.996
SNX20	-7.63	12	-1.91	0.0283	422	0.978	0.972	16808	0.996
GDAP1	-7.63	12	-1.91	0.0283	423	0.978	0.972	16807	0.996
CC2D1B	-7.62	12	-1.91	0.0283	424	0.978	0.972	16806	0.996
PDGFC	-7.62	12	-1.9	0.0284	425	0.978	0.972	16805	0.996
LTA	-6.95	10	-1.9	0.0285	426	0.978	0.972	16804	0.996
PPP4R2	-3.11	2	-1.9	0.0286	427	0.978	0.971	16803	0.996
C1orf51	-7.6	12	-1.9	0.0287	428	0.978	0.971	16802	0.996
KIAA1328	-7.6	12	-1.9	0.0288	429	0.978	0.971	16801	0.996
ENPP3	-7.6	12	-1.9	0.0288	430	0.978	0.971	16800	0.996
TCOF1	-7.59	12	-1.9	0.0289	431	0.978	0.971	16799	0.996
ADPRH	-7.59	12	-1.9	0.029	432	0.978	0.971	16798	0.996
PIAS3	-7.59	12	-1.9	0.029	433	0.978	0.971	16797	0.996
CC2D1A	-7.58	12	-1.89	0.0291	434	0.978	0.971	16796	0.996
TRAF2	-7.58	12	-1.89	0.0291	435	0.978	0.971	16795	0.996
MXRA5	-7.58	12	-1.89	0.0291	436	0.978	0.971	16794	0.996
DNAL4	-7.57	12	-1.89	0.0292	437	0.978	0.971	16793	0.996
DENND3	-7.57	12	-1.89	0.0293	438	0.978	0.971	16792	0.996
WDR35	-7.57	12	-1.89	0.0293	439	0.978	0.971	16791	0.996
C1orf112	-7.57	12	-1.89	0.0293	440	0.978	0.971	16790	0.996
CD70	-7.56	12	-1.89	0.0294	441	0.978	0.971	16789	0.996
DDX21	-7.56	12	-1.89	0.0294	442	0.978	0.971	16788	0.996
MYH6	-7.56	12	-1.89	0.0294	443	0.978	0.971	16787	0.996
FAM199X	-7.56	12	-1.89	0.0294	444	0.978	0.971	16786	0.996
WDYHV1	-6.9	10	-1.89	0.0294	445	0.978	0.971	16785	0.996
USP11	-7.56	12	-1.89	0.0295	446	0.978	0.97	16784	0.996
ZNF774	-7.55	12	-1.89	0.0296	447	0.978	0.97	16783	0.996
ZNF853	-6.88	10	-1.88	0.0298	448	0.978	0.97	16782	0.996
OTOP3	-7.54	12	-1.88	0.0298	449	0.978	0.97	16781	0.996
PAQR8	-7.53	12	-1.88	0.0299	450	0.978	0.97	16780	0.996
PLEC	-7.53	12	-1.88	0.03	451	0.978	0.97	16779	0.996
FAM187A	-6.14	8	-1.88	0.0301	452	0.978	0.97	16778	0.996
RRP9	-7.52	12	-1.88	0.0301	453	0.978	0.97	16777	0.996
ZSCAN25	-7.52	12	-1.88	0.0301	454	0.978	0.97	16776	0.996
TOP3B	-7.52	12	-1.88	0.0302	455	0.978	0.97	16775	0.996
BECN1	-6.86	10	-1.88	0.0303	456	0.978	0.97	16774	0.996
C17orf53	-7.51	12	-1.88	0.0304	457	0.978	0.97	16773	0.996
ECEL1	-7.51	12	-1.87	0.0304	458	0.978	0.97	16772	0.996
SUZ12	-6.85	10	-1.87	0.0304	459	0.978	0.97	16771	0.996
LRP2	-7.51	12	-1.87	0.0304	460	0.978	0.97	16770	0.996
ALDH3B2	-5.29	6	-1.87	0.0308	461	0.978	0.969	16769	0.996
TMEM169	-7.48	12	-1.87	0.0309	462	0.978	0.969	16768	0.996
FAM151A	-6.82	10	-1.87	0.031	463	0.978	0.969	16767	0.996
RPS6KB1	-6.82	10	-1.87	0.031	464	0.978	0.969	16766	0.996
TSPAN32	-7.46	12	-1.86	0.0312	465	0.978	0.969	16765	0.996
LYPLA1	-3.05	2	-1.86	0.0312	466	0.978	0.969	16764	0.996
IGHMBP2	-7.46	12	-1.86	0.0313	467	0.978	0.969	16763	0.996
VDAC2	-3.05	2	-1.86	0.0313	468	0.978	0.969	16762	0.996
RGR	-7.46	12	-1.86	0.0313	469	0.978	0.969	16761	0.996
BLOC1S2	-3.04	2	-1.86	0.0313	470	0.978	0.969	16760	0.996
SRCIN1	-7.45	12	-1.86	0.0314	471	0.978	0.969	16759	0.996
CXCR1	-6.08	8	-1.86	0.0314	472	0.978	0.969	16758	0.996
NPRL3	-7.45	12	-1.86	0.0315	473	0.978	0.968	16757	0.996
TRAM1	-4.3	4	-1.86	0.0316	474	0.978	0.968	16756	0.996
TPH2	-7.44	12	-1.86	0.0317	475	0.978	0.968	16755	0.996
RASL10A	-7.43	12	-1.86	0.0318	476	0.978	0.968	16754	0.996
ZNF33A	-4.29	4	-1.85	0.0319	477	0.978	0.968	16753	0.996
HELT	-7.43	12	-1.85	0.0319	478	0.978	0.968	16752	0.996
TG	-7.42	12	-1.85	0.0319	479	0.978	0.968	16751	0.996
FAM212A	-7.42	12	-1.85	0.0319	480	0.978	0.968	16750	0.996
PTGDS	-7.42	12	-1.85	0.032	481	0.978	0.968	16749	0.996
TRIP12	-7.42	12	-1.85	0.032	482	0.978	0.968	16748	0.996
TMEM52	-7.42	12	-1.85	0.032	483	0.978	0.968	16747	0.996
NSF	-7.42	12	-1.85	0.032	484	0.978	0.968	16746	0.996
TAGLN3	-7.42	12	-1.85	0.0321	485	0.978	0.968	16745	0.996
IL17RC	-7.41	12	-1.85	0.0321	486	0.978	0.968	16744	0.996
KDELR1	-7.41	12	-1.85	0.0322	487	0.978	0.968	16743	0.996
GOLGA3	-7.41	12	-1.85	0.0323	488	0.978	0.968	16742	0.996
BHLHE23	-6.76	10	-1.85	0.0323	489	0.978	0.968	16741	0.996
AQP5	-7.4	12	-1.85	0.0324	490	0.978	0.968	16740	0.996
CACFD1	-7.39	12	-1.84	0.0327	491	0.978	0.967	16739	0.996
HOXB9	-7.37	12	-1.84	0.033	492	0.978	0.967	16738	0.995
MDK	-6.72	10	-1.84	0.0331	493	0.978	0.967	16737	0.995
MIXL1	-7.36	12	-1.84	0.0331	494	0.978	0.967	16736	0.995
HRNR	-5.2	6	-1.84	0.0332	495	0.978	0.967	16735	0.995
SGPP1	-7.36	12	-1.84	0.0332	496	0.978	0.967	16734	0.995
PPME1	-7.34	12	-1.83	0.0335	497	0.978	0.967	16733	0.995
HOMER1	-6.7	10	-1.83	0.0335	498	0.978	0.966	16732	0.995
C1orf122	-6.69	10	-1.83	0.0337	499	0.978	0.966	16731	0.995
MED30	-5.18	6	-1.83	0.0338	500	0.978	0.966	16730	0.995
SYPL2	-7.33	12	-1.83	0.0338	501	0.978	0.966	16729	0.995
PTPRN	-7.32	12	-1.83	0.0339	502	0.978	0.966	16728	0.995
ABCA9	-7.32	12	-1.83	0.0339	503	0.978	0.966	16727	0.995
CISD2	-5.98	8	-1.83	0.034	504	0.978	0.966	16726	0.995
GABARAP	-2.99	2	-1.82	0.034	505	0.978	0.966	16725	0.995
KLK10	-7.31	12	-1.82	0.0341	506	0.978	0.966	16724	0.995
MYOC	-7.31	12	-1.82	0.0342	507	0.978	0.966	16723	0.995
GPR161	-7.3	12	-1.82	0.0343	508	0.978	0.966	16722	0.995
ALCAM	-7.3	12	-1.82	0.0344	509	0.978	0.966	16721	0.995
TCP11L2	-7.3	12	-1.82	0.0344	510	0.978	0.966	16720	0.995
CDC7	-5.16	6	-1.82	0.0344	511	0.978	0.966	16719	0.995
HAS3	-7.3	12	-1.82	0.0344	512	0.978	0.966	16718	0.995
STX1A	-7.29	12	-1.82	0.0345	513	0.978	0.966	16717	0.995
SLC1A6	-7.29	12	-1.82	0.0345	514	0.978	0.965	16716	0.995
ZBTB20	-7.29	12	-1.82	0.0346	515	0.978	0.965	16715	0.995
AGAP2	-7.29	12	-1.82	0.0346	516	0.978	0.965	16714	0.995
DHRS4	-4.21	4	-1.82	0.0347	517	0.978	0.965	16713	0.995
F8	-7.28	12	-1.82	0.0347	518	0.978	0.965	16712	0.995
SF1	-7.28	12	-1.82	0.0347	519	0.978	0.965	16711	0.995
RBCK1	-7.27	12	-1.81	0.035	520	0.978	0.965	16710	0.995
HSD3B7	-7.27	12	-1.81	0.035	521	0.978	0.965	16709	0.995
KLHL2	-7.27	12	-1.81	0.035	522	0.978	0.965	16708	0.995
ZNF622	-7.26	12	-1.81	0.0351	523	0.978	0.965	16707	0.995
INO80D	-7.25	12	-1.81	0.0353	524	0.978	0.965	16706	0.995
C10orf71	-7.25	12	-1.81	0.0355	525	0.978	0.965	16705	0.995
ZC3H7A	-7.24	12	-1.81	0.0355	526	0.978	0.964	16704	0.995
GPR75	-6.61	10	-1.8	0.0356	527	0.978	0.964	16703	0.995
GDF7	-7.24	12	-1.8	0.0356	528	0.978	0.964	16702	0.995
DOK4	-7.23	12	-1.8	0.0358	529	0.978	0.964	16701	0.995
RGL3	-7.22	12	-1.8	0.0359	530	0.978	0.964	16700	0.995
INTU	-7.22	12	-1.8	0.036	531	0.978	0.964	16699	0.995
SPPL2C	-6.58	10	-1.8	0.0362	532	0.978	0.964	16698	0.994
TRPV2	-7.21	12	-1.8	0.0362	533	0.978	0.964	16697	0.994
EMC7	-6.58	10	-1.8	0.0363	534	0.978	0.964	16696	0.994
MED23	-7.2	12	-1.8	0.0363	535	0.978	0.964	16695	0.994
TPM1	-7.2	12	-1.79	0.0364	536	0.978	0.964	16694	0.994
IFNGR2	-7.2	12	-1.79	0.0364	537	0.978	0.964	16693	0.994
CNIH4	-6.57	10	-1.79	0.0364	538	0.978	0.964	16692	0.994
SFXN2	-7.2	12	-1.79	0.0365	539	0.978	0.964	16691	0.994
THAP4	-7.19	12	-1.79	0.0366	540	0.978	0.963	16690	0.994
CCDC146	-7.19	12	-1.79	0.0366	541	0.978	0.963	16689	0.994
ARHGEF4	-7.19	12	-1.79	0.0367	542	0.978	0.963	16688	0.994
CTXN1	-5.08	6	-1.79	0.0368	543	0.978	0.963	16687	0.994
SFT2D1	-6.56	10	-1.79	0.0368	544	0.978	0.963	16686	0.994
PYGB	-7.18	12	-1.79	0.0368	545	0.978	0.963	16685	0.994
LTBP4	-7.18	12	-1.79	0.0368	546	0.978	0.963	16684	0.994
KRT83	-4.14	4	-1.79	0.0369	547	0.978	0.963	16683	0.994
AJUBA	-7.17	12	-1.79	0.037	548	0.978	0.963	16682	0.994
DNASE1	-7.17	12	-1.79	0.0371	549	0.978	0.963	16681	0.994
CCDC141	-7.16	12	-1.78	0.0372	550	0.978	0.963	16680	0.994
ABCC1	-7.16	12	-1.78	0.0372	551	0.978	0.963	16679	0.994
CTSC	-7.16	12	-1.78	0.0373	552	0.978	0.963	16678	0.994
TFAP4	-7.16	12	-1.78	0.0373	553	0.978	0.963	16677	0.994
KCTD16	-7.16	12	-1.78	0.0373	554	0.978	0.963	16676	0.994
TCF7L2	-7.15	12	-1.78	0.0374	555	0.978	0.963	16675	0.994
KRT78	-5.84	8	-1.78	0.0374	556	0.978	0.963	16674	0.994
C11orf87	-6.53	10	-1.78	0.0375	557	0.978	0.963	16673	0.994
TMEM134	-7.15	12	-1.78	0.0375	558	0.978	0.962	16672	0.994
LECT2	-7.15	12	-1.78	0.0376	559	0.978	0.962	16671	0.994
ICAM3	-7.14	12	-1.78	0.0376	560	0.978	0.962	16670	0.994
TULP3	-7.14	12	-1.78	0.0377	561	0.978	0.962	16669	0.994
EHMT1	-7.13	12	-1.78	0.0378	562	0.978	0.962	16668	0.994
SPRN	-5.82	8	-1.77	0.038	563	0.978	0.962	16667	0.994
C1orf54	-5.82	8	-1.77	0.038	564	0.978	0.962	16666	0.994
CCNO	-7.12	12	-1.77	0.038	565	0.978	0.962	16665	0.994
TEX33	-7.12	12	-1.77	0.0381	566	0.978	0.962	16664	0.994
SOCS6	-5.03	6	-1.77	0.0382	567	0.978	0.962	16663	0.994
CD34	-7.12	12	-1.77	0.0382	568	0.978	0.962	16662	0.994
POLD3	-7.12	12	-1.77	0.0382	569	0.978	0.962	16661	0.994
MANEAL	-7.11	12	-1.77	0.0382	570	0.978	0.962	16660	0.994
PCGF2	-7.11	12	-1.77	0.0383	571	0.978	0.962	16659	0.994
C1QL3	-6.49	10	-1.77	0.0384	572	0.978	0.962	16658	0.994
CDC42EP3	-5.02	6	-1.77	0.0385	573	0.978	0.962	16657	0.994
HIST2H2AB	-5.02	6	-1.77	0.0385	574	0.978	0.962	16656	0.994
MAP3K13	-7.09	12	-1.77	0.0387	575	0.978	0.961	16655	0.994
FLYWCH1	-7.09	12	-1.76	0.0388	576	0.978	0.961	16654	0.994
ABT1	-7.09	12	-1.76	0.0389	577	0.978	0.961	16653	0.994
ZNF267	-2.89	2	-1.76	0.039	578	0.978	0.961	16652	0.994
UCK2	-7.08	12	-1.76	0.039	579	0.978	0.961	16651	0.994
SLC35F4	-7.07	12	-1.76	0.0392	580	0.978	0.961	16650	0.994
FBLN1	-7.07	12	-1.76	0.0392	581	0.978	0.961	16649	0.994
CENPV	-6.45	10	-1.76	0.0393	582	0.978	0.961	16648	0.994
MEOX1	-5.77	8	-1.76	0.0394	583	0.978	0.961	16647	0.994
C19orf44	-7.06	12	-1.76	0.0395	584	0.978	0.961	16646	0.994
SPP2	-7.06	12	-1.76	0.0395	585	0.978	0.96	16645	0.994
PRR3	-6.44	10	-1.76	0.0395	586	0.978	0.96	16644	0.994
RANBP3	-7.06	12	-1.76	0.0395	587	0.978	0.96	16643	0.994
FAM171B	-7.06	12	-1.76	0.0396	588	0.978	0.96	16642	0.994
ENPEP	-7.05	12	-1.76	0.0396	589	0.978	0.96	16641	0.994
BHLHE40	-7.05	12	-1.75	0.0397	590	0.978	0.96	16640	0.994
RNF207	-7.05	12	-1.75	0.0397	591	0.978	0.96	16639	0.994
STYX	-4.07	4	-1.75	0.0397	592	0.978	0.96	16638	0.994
HSD17B11	-4.98	6	-1.75	0.0398	593	0.978	0.96	16637	0.994
BAZ1A	-7.04	12	-1.75	0.0398	594	0.978	0.96	16636	0.994
RAI2	-5.75	8	-1.75	0.0399	595	0.978	0.96	16635	0.994
RBM25	-6.74	11	-1.75	0.0399	596	0.978	0.96	16634	0.994
ANLN	-7.04	12	-1.75	0.0399	597	0.978	0.96	16633	0.994
TOP1	-7.04	12	-1.75	0.04	598	0.978	0.96	16632	0.994
CHRAC1	-5.74	8	-1.75	0.0402	599	0.978	0.96	16631	0.994
DSCAML1	-7.02	12	-1.75	0.0402	600	0.978	0.96	16630	0.994
RLTPR	-7.02	12	-1.75	0.0404	601	0.978	0.96	16629	0.994
FKBP1B	-7.02	12	-1.75	0.0404	602	0.978	0.96	16628	0.994
NR2C2	-7.01	12	-1.74	0.0405	603	0.978	0.959	16627	0.994
ISX	-7.01	12	-1.74	0.0405	604	0.978	0.959	16626	0.994
LEO1	-7.01	12	-1.74	0.0406	605	0.978	0.959	16625	0.994
CYP27B1	-7.01	12	-1.74	0.0406	606	0.978	0.959	16624	0.994
MFAP5	-4.96	6	-1.74	0.0406	607	0.978	0.959	16623	0.994
CCDC135	-7.01	12	-1.74	0.0406	608	0.978	0.959	16622	0.994
CRYM	-7.01	12	-1.74	0.0407	609	0.978	0.959	16621	0.994
PSMB10	-7	12	-1.74	0.0407	610	0.978	0.959	16620	0.994
APBA3	-7	12	-1.74	0.0407	611	0.978	0.959	16619	0.994
ASF1A	-6.99	12	-1.74	0.041	612	0.978	0.959	16618	0.994
FBXO6	-6.99	12	-1.74	0.041	613	0.978	0.959	16617	0.994
TBPL2	-6.38	10	-1.74	0.0411	614	0.978	0.959	16616	0.994
CYP2S1	-6.99	12	-1.74	0.0411	615	0.978	0.959	16615	0.994
YY2	-6.99	12	-1.74	0.0411	616	0.978	0.959	16614	0.994
STMN3	-6.38	10	-1.74	0.0412	617	0.978	0.959	16613	0.994
SLC5A4	-6.98	12	-1.74	0.0413	618	0.978	0.959	16612	0.994
IL11	-6.97	12	-1.73	0.0414	619	0.978	0.959	16611	0.994
EXOSC3	-5.69	8	-1.73	0.0414	620	0.978	0.959	16610	0.994
RPL35	-2.84	2	-1.73	0.0416	621	0.978	0.958	16609	0.994
CNOT3	-6.67	11	-1.73	0.0417	622	0.978	0.958	16608	0.994
PPP1R1A	-6.96	12	-1.73	0.0417	623	0.978	0.958	16607	0.994
GNAO1	-6.96	12	-1.73	0.0418	624	0.978	0.958	16606	0.994
DPY19L1	-4.01	4	-1.73	0.042	625	0.978	0.958	16605	0.994
SNRNP70	-6.95	12	-1.73	0.042	626	0.978	0.958	16604	0.994
ZFP92	-6.34	10	-1.73	0.042	627	0.978	0.958	16603	0.994
HEXA	-6.94	12	-1.73	0.0421	628	0.978	0.958	16602	0.994
ELL2	-6.94	12	-1.73	0.0423	629	0.978	0.958	16601	0.994
BBS9	-6.94	12	-1.72	0.0423	630	0.978	0.958	16600	0.994
GRB14	-6.93	12	-1.72	0.0423	631	0.978	0.958	16599	0.994
DOK2	-6.93	12	-1.72	0.0424	632	0.978	0.958	16598	0.994
PPP1R16A	-6.93	12	-1.72	0.0424	633	0.978	0.958	16597	0.994
FIBCD1	-6.93	12	-1.72	0.0424	634	0.978	0.958	16596	0.994
ERCC3	-6.93	12	-1.72	0.0426	635	0.978	0.957	16595	0.994
ADAMTS18	-6.92	12	-1.72	0.0428	636	0.978	0.957	16594	0.994
AGXT2	-6.92	12	-1.72	0.0428	637	0.978	0.957	16593	0.994
COL11A2	-6.91	12	-1.72	0.0429	638	0.978	0.957	16592	0.994
PTER	-6.91	12	-1.72	0.0429	639	0.978	0.957	16591	0.994
EMC8	-6.91	12	-1.72	0.043	640	0.978	0.957	16590	0.994
JUND	-6.91	12	-1.72	0.043	641	0.978	0.957	16589	0.994
ZNF721	-2.82	2	-1.72	0.0431	642	0.978	0.957	16588	0.994
USHBP1	-6.6	11	-1.71	0.0433	643	0.978	0.957	16587	0.994
EAF1	-6.89	12	-1.71	0.0434	644	0.978	0.957	16586	0.994
CITED2	-4.87	6	-1.71	0.0434	645	0.978	0.957	16585	0.994
LEPREL4	-6.88	12	-1.71	0.0436	646	0.978	0.956	16584	0.994
UCKL1	-6.88	12	-1.71	0.0436	647	0.978	0.956	16583	0.994
SOX17	-6.28	10	-1.71	0.0436	648	0.978	0.956	16582	0.994
TCF7L1	-6.88	12	-1.71	0.0437	649	0.978	0.956	16581	0.994
CD5	-6.88	12	-1.71	0.0437	650	0.978	0.956	16580	0.994
CCDC97	-6.88	12	-1.71	0.0437	651	0.978	0.956	16579	0.994
CAPSL	-3.97	4	-1.71	0.0438	652	0.978	0.956	16578	0.994
EHBP1L1	-6.87	12	-1.71	0.0438	653	0.978	0.956	16577	0.994
MTMR9	-6.87	12	-1.71	0.0439	654	0.978	0.956	16576	0.994
MAPK8IP1	-6.87	12	-1.71	0.0439	655	0.978	0.956	16575	0.994
PLS1	-6.87	12	-1.71	0.0439	656	0.978	0.956	16574	0.994
RAB40C	-6.87	12	-1.71	0.044	657	0.978	0.956	16573	0.994
TMEM47	-5.6	8	-1.71	0.044	658	0.978	0.956	16572	0.994
STXBP4	-6.86	12	-1.71	0.0441	659	0.978	0.956	16571	0.994
FAN1	-6.86	12	-1.71	0.0441	660	0.978	0.956	16570	0.994
ACCSL	-6.86	12	-1.71	0.0441	661	0.978	0.956	16569	0.994
ATF5	-6.86	12	-1.7	0.0442	662	0.978	0.956	16568	0.994
NAA38	-2.8	2	-1.7	0.0442	663	0.978	0.956	16567	0.994
AQP3	-6.85	12	-1.7	0.0444	664	0.978	0.956	16566	0.994
SEPT8	-6.85	12	-1.7	0.0444	665	0.978	0.956	16565	0.994
ZNF697	-6.85	12	-1.7	0.0444	666	0.978	0.956	16564	0.994
MCM9	-6.84	12	-1.7	0.0446	667	0.978	0.955	16563	0.994
KCNC3	-6.84	12	-1.7	0.0446	668	0.978	0.955	16562	0.994
GPD1	-6.83	12	-1.7	0.0448	669	0.978	0.955	16561	0.994
TXNIP	-6.83	12	-1.7	0.045	670	0.978	0.955	16560	0.994
PRR12	-6.82	12	-1.7	0.045	671	0.978	0.955	16559	0.994
DNAJC12	-5.57	8	-1.69	0.0451	672	0.978	0.955	16558	0.994
GPRASP1	-6.22	10	-1.69	0.0452	673	0.978	0.955	16557	0.994
PAQR4	-6.81	12	-1.69	0.0454	674	0.978	0.955	16556	0.993
RC3H1	-6.81	12	-1.69	0.0455	675	0.978	0.955	16555	0.993
SETBP1	-6.8	12	-1.69	0.0455	676	0.978	0.954	16554	0.993
PLEKHG4	-6.8	12	-1.69	0.0456	677	0.978	0.954	16553	0.993
LOXL1	-6.8	12	-1.69	0.0456	678	0.978	0.954	16552	0.993
PRR26	-6.8	12	-1.69	0.0457	679	0.978	0.954	16551	0.993
BCOR	-6.8	12	-1.69	0.0457	680	0.978	0.954	16550	0.993
ZFYVE28	-6.79	12	-1.69	0.0459	681	0.978	0.954	16549	0.993
FEM1B	-6.79	12	-1.69	0.0459	682	0.978	0.954	16548	0.993
REV3L	-6.79	12	-1.69	0.046	683	0.978	0.954	16547	0.993
ADAM33	-6.79	12	-1.69	0.046	684	0.978	0.954	16546	0.993
TTBK2	-6.78	12	-1.68	0.046	685	0.978	0.954	16545	0.993
MSLNL	-6.78	12	-1.68	0.0461	686	0.978	0.954	16544	0.993
CD69	-5.54	8	-1.68	0.0461	687	0.978	0.954	16543	0.993
DHX32	-6.78	12	-1.68	0.0462	688	0.978	0.954	16542	0.993
C4orf46	-2.77	2	-1.68	0.0462	689	0.978	0.954	16541	0.993
PEX3	-3.91	4	-1.68	0.0463	690	0.978	0.954	16540	0.993
NDST4	-6.77	12	-1.68	0.0463	691	0.978	0.954	16539	0.993
TMC8	-6.75	12	-1.67	0.047	692	0.978	0.953	16538	0.993
CHST13	-6.15	10	-1.67	0.0471	693	0.978	0.953	16537	0.993
SH3BGRL3	-3.89	4	-1.67	0.0472	694	0.978	0.953	16536	0.993
RSPH9	-6.74	12	-1.67	0.0472	695	0.978	0.953	16535	0.993
BAZ1B	-6.73	12	-1.67	0.0473	696	0.978	0.953	16534	0.993
KTI12	-6.14	10	-1.67	0.0475	697	0.978	0.953	16533	0.993
SLC4A1AP	-6.73	12	-1.67	0.0475	698	0.978	0.952	16532	0.993
TMEM216	-6.14	10	-1.67	0.0475	699	0.978	0.952	16531	0.993
PPP1R14C	-5.49	8	-1.67	0.0476	700	0.978	0.952	16530	0.993
NSUN7	-6.72	12	-1.67	0.0477	701	0.978	0.952	16529	0.993
GCNT3	-6.13	10	-1.66	0.048	702	0.978	0.952	16528	0.992
PARD6G	-6.71	12	-1.66	0.048	703	0.978	0.952	16527	0.992
VANGL1	-6.71	12	-1.66	0.048	704	0.978	0.952	16526	0.992
GPSM1	-6.71	12	-1.66	0.0481	705	0.978	0.952	16525	0.992
LDLRAD2	-6.7	12	-1.66	0.0483	706	0.978	0.952	16524	0.992
SLC2A4RG	-6.7	12	-1.66	0.0483	707	0.978	0.952	16523	0.992
GAS7	-6.69	12	-1.66	0.0485	708	0.978	0.952	16522	0.992
RAD54L	-6.69	12	-1.66	0.0485	709	0.978	0.951	16521	0.992
ZNF616	-2.73	2	-1.66	0.0487	710	0.978	0.951	16520	0.992
S100PBP	-6.68	12	-1.66	0.0487	711	0.978	0.951	16519	0.992
RBPJL	-6.68	12	-1.66	0.0487	712	0.978	0.951	16518	0.992
SYAP1	-6.68	12	-1.66	0.0488	713	0.978	0.951	16517	0.992
PLEKHA5	-6.68	12	-1.66	0.0488	714	0.978	0.951	16516	0.992
FGD5	-6.67	12	-1.66	0.0489	715	0.978	0.951	16515	0.992
SPRY2	-6.67	12	-1.66	0.0489	716	0.978	0.951	16514	0.992
OR2Y1	-4.72	6	-1.66	0.0489	717	0.978	0.951	16513	0.992
PM20D2	-6.67	12	-1.66	0.049	718	0.978	0.951	16512	0.992
FNBP1L	-6.67	12	-1.66	0.049	719	0.978	0.951	16511	0.992
GLB1L3	-6.67	12	-1.65	0.049	720	0.978	0.951	16510	0.992
OR2A25	-2.72	2	-1.65	0.049	721	0.978	0.951	16509	0.992
TP53INP1	-6.67	12	-1.65	0.0491	722	0.978	0.951	16508	0.992
SIPA1	-6.67	12	-1.65	0.0491	723	0.978	0.951	16507	0.992
SLC16A5	-6.66	12	-1.65	0.0492	724	0.978	0.951	16506	0.992
NIPAL2	-4.71	6	-1.65	0.0492	725	0.978	0.951	16505	0.992
CRNN	-6.66	12	-1.65	0.0494	726	0.978	0.951	16504	0.992
CISD3	-6.08	10	-1.65	0.0494	727	0.978	0.951	16503	0.992
MEDAG	-6.65	12	-1.65	0.0496	728	0.978	0.95	16502	0.992
LIN37	-6.65	12	-1.65	0.0496	729	0.978	0.95	16501	0.992
NR2F1	-6.64	12	-1.65	0.0497	730	0.978	0.95	16500	0.992
EFCAB13	-3.84	4	-1.65	0.0497	731	0.978	0.95	16499	0.992
PPP1CC	-5.42	8	-1.65	0.0497	732	0.978	0.95	16498	0.992
NHEJ1	-6.06	10	-1.65	0.0498	733	0.978	0.95	16497	0.992
GNAT2	-6.64	12	-1.65	0.0499	734	0.978	0.95	16496	0.992
ARMC5	-6.64	12	-1.65	0.0499	735	0.978	0.95	16495	0.992
ZNF653	-6.63	12	-1.64	0.05	736	0.978	0.95	16494	0.992
GPRIN3	-6.05	10	-1.64	0.0501	737	0.978	0.95	16493	0.992
ZNF689	-6.63	12	-1.64	0.0501	738	0.978	0.95	16492	0.992
TXNDC8	-3.83	4	-1.64	0.0501	739	0.978	0.95	16491	0.992
CPD	-6.63	12	-1.64	0.0502	740	0.978	0.95	16490	0.992
JAM2	-5.41	8	-1.64	0.0502	741	0.978	0.95	16489	0.992
SETD9	-4.68	6	-1.64	0.0503	742	0.978	0.95	16488	0.992
CRISP2	-4.68	6	-1.64	0.0503	743	0.978	0.95	16487	0.992
ASIC4	-6.62	12	-1.64	0.0503	744	0.978	0.95	16486	0.992
BAG3	-6.61	12	-1.64	0.0505	745	0.978	0.949	16485	0.992
ASPHD1	-6.04	10	-1.64	0.0505	746	0.978	0.949	16484	0.992
SPRYD7	-6.03	10	-1.64	0.0507	747	0.978	0.949	16483	0.992
PPM1M	-6.61	12	-1.64	0.0508	748	0.978	0.949	16482	0.992
PRKACA	-6.6	12	-1.64	0.0508	749	0.978	0.949	16481	0.992
CYHR1	-6.6	12	-1.64	0.0509	750	0.978	0.949	16480	0.992
FAM110A	-6.6	12	-1.64	0.0509	751	0.978	0.949	16479	0.992
SLCO1B1	-3.81	4	-1.64	0.051	752	0.978	0.949	16478	0.992
DNAJA3	-6.6	12	-1.64	0.051	753	0.978	0.949	16477	0.992
UBALD1	-6.02	10	-1.63	0.0511	754	0.978	0.949	16476	0.992
TNFRSF14	-6.59	12	-1.63	0.0511	755	0.978	0.949	16475	0.992
RASSF1	-6.59	12	-1.63	0.0513	756	0.978	0.949	16474	0.992
ARHGEF11	-6.59	12	-1.63	0.0513	757	0.978	0.949	16473	0.992
TPM2	-6.59	12	-1.63	0.0513	758	0.978	0.949	16472	0.992
PSMD5	-6.58	12	-1.63	0.0514	759	0.978	0.949	16471	0.992
C1orf106	-6.58	12	-1.63	0.0514	760	0.978	0.949	16470	0.992
SLC6A16	-6.57	12	-1.63	0.0517	761	0.978	0.948	16469	0.992
HOXC11	-6.57	12	-1.63	0.0518	762	0.978	0.948	16468	0.992
TNFRSF10B	-6.57	12	-1.63	0.0519	763	0.978	0.948	16467	0.992
WHSC1L1	-6.56	12	-1.63	0.052	764	0.978	0.948	16466	0.992
RFC5	-6.56	12	-1.63	0.052	765	0.978	0.948	16465	0.992
SPAG8	-6.55	12	-1.62	0.0523	766	0.978	0.948	16464	0.992
C14orf178	-2.67	2	-1.62	0.0523	767	0.978	0.948	16463	0.992
CDC42EP1	-5.97	10	-1.62	0.0524	768	0.978	0.948	16462	0.992
TRIM62	-6.54	12	-1.62	0.0524	769	0.978	0.948	16461	0.992
ARMC6	-6.54	12	-1.62	0.0525	770	0.978	0.948	16460	0.992
EN1	-5.97	10	-1.62	0.0525	771	0.978	0.948	16459	0.992
HOXB2	-6.54	12	-1.62	0.0526	772	0.978	0.947	16458	0.992
HOXC6	-5.34	8	-1.62	0.0527	773	0.978	0.947	16457	0.992
C12orf55	-6.52	12	-1.62	0.053	774	0.978	0.947	16456	0.991
KCND1	-6.52	12	-1.62	0.0531	775	0.978	0.947	16455	0.991
OR56B4	-4.61	6	-1.62	0.0531	776	0.978	0.947	16454	0.991
HOXA5	-6.52	12	-1.61	0.0532	777	0.978	0.947	16453	0.991
FAM189A2	-6.52	12	-1.61	0.0533	778	0.978	0.947	16452	0.991
RPS29	-2.66	2	-1.61	0.0533	779	0.978	0.947	16451	0.991
CDK2AP1	-3.76	4	-1.61	0.0534	780	0.978	0.947	16450	0.991
RPP25	-6.51	12	-1.61	0.0534	781	0.978	0.947	16449	0.991
RBM46	-6.51	12	-1.61	0.0535	782	0.978	0.947	16448	0.991
ZFPL1	-6.51	12	-1.61	0.0535	783	0.978	0.947	16447	0.991
RPGRIP1	-6.51	12	-1.61	0.0535	784	0.978	0.946	16446	0.991
INPP4A	-6.5	12	-1.61	0.0537	785	0.978	0.946	16445	0.991
VTI1A	-6.5	12	-1.61	0.0538	786	0.978	0.946	16444	0.991
NOD1	-6.49	12	-1.61	0.0539	787	0.978	0.946	16443	0.991
EMC4	-6.49	12	-1.61	0.0539	788	0.978	0.946	16442	0.991
SOCS1	-5.93	10	-1.61	0.0539	789	0.978	0.946	16441	0.991
DUS3L	-6.49	12	-1.61	0.0539	790	0.978	0.946	16440	0.991
SH2B1	-6.49	12	-1.61	0.054	791	0.978	0.946	16439	0.991
CST9L	-4.59	6	-1.61	0.0541	792	0.978	0.946	16438	0.991
RHBDF2	-6.49	12	-1.61	0.0541	793	0.978	0.946	16437	0.991
NES	-6.49	12	-1.61	0.0541	794	0.978	0.946	16436	0.991
CWF19L1	-6.48	12	-1.6	0.0544	795	0.978	0.946	16435	0.991
RIPK4	-6.2	11	-1.6	0.0544	796	0.978	0.946	16434	0.991
DNM2	-6.2	11	-1.6	0.0545	797	0.978	0.945	16433	0.991
FBXL3	-6.47	12	-1.6	0.0546	798	0.978	0.945	16432	0.991
KDM4A	-6.47	12	-1.6	0.0547	799	0.978	0.945	16431	0.991
DBNL	-6.47	12	-1.6	0.0547	800	0.978	0.945	16430	0.991
CCDC178	-3.73	4	-1.6	0.0547	801	0.978	0.945	16429	0.991
EXT1	-6.46	12	-1.6	0.0547	802	0.978	0.945	16428	0.991
POM121L2	-5.9	10	-1.6	0.0548	803	0.978	0.945	16427	0.991
DCTD	-6.46	12	-1.6	0.0548	804	0.978	0.945	16426	0.991
DDX54	-6.46	12	-1.6	0.0549	805	0.978	0.945	16425	0.991
PIAS4	-6.45	12	-1.6	0.0551	806	0.978	0.945	16424	0.991
NLRP3	-6.45	12	-1.6	0.0552	807	0.978	0.945	16423	0.991
KLHL22	-6.45	12	-1.6	0.0552	808	0.978	0.945	16422	0.991
ZC3H10	-5.89	10	-1.6	0.0552	809	0.978	0.945	16421	0.991
BEX4	-5.26	8	-1.59	0.0555	810	0.978	0.944	16420	0.991
TH	-6.44	12	-1.59	0.0556	811	0.978	0.944	16419	0.991
HSF2	-4.55	6	-1.59	0.0557	812	0.978	0.944	16418	0.991
OR52W1	-5.25	8	-1.59	0.0557	813	0.978	0.944	16417	0.991
ZNF319	-5.25	8	-1.59	0.0557	814	0.978	0.944	16416	0.991
SPAG6	-6.43	12	-1.59	0.0558	815	0.978	0.944	16415	0.991
RPAIN	-5.87	10	-1.59	0.0558	816	0.978	0.944	16414	0.991
MCCD1	-2.62	2	-1.59	0.0558	817	0.978	0.944	16413	0.991
BAZ2B	-6.43	12	-1.59	0.0559	818	0.978	0.944	16412	0.991
MFAP1	-6.42	12	-1.59	0.056	819	0.978	0.944	16411	0.991
PIGF	-3.71	4	-1.59	0.056	820	0.978	0.944	16410	0.991
MED7	-4.54	6	-1.59	0.0561	821	0.978	0.944	16409	0.991
DYNC1LI2	-6.41	12	-1.59	0.0562	822	0.978	0.944	16408	0.991
TMEM175	-6.41	12	-1.59	0.0563	823	0.978	0.944	16407	0.991
CCDC136	-6.41	12	-1.59	0.0563	824	0.978	0.944	16406	0.991
NFAM1	-6.41	12	-1.59	0.0564	825	0.978	0.944	16405	0.991
SPIB	-6.41	12	-1.59	0.0564	826	0.978	0.944	16404	0.991
TBX22	-6.4	12	-1.58	0.0567	827	0.978	0.943	16403	0.991
GCN1L1	-6.4	12	-1.58	0.0567	828	0.978	0.943	16402	0.991
RAB12	-5.22	8	-1.58	0.0568	829	0.978	0.943	16401	0.991
SLC5A2	-6.39	12	-1.58	0.0568	830	0.978	0.943	16400	0.991
KRT13	-6.39	12	-1.58	0.0569	831	0.978	0.943	16399	0.991
ZNF226	-5.22	8	-1.58	0.057	832	0.978	0.943	16398	0.991
NUDCD3	-6.39	12	-1.58	0.0571	833	0.978	0.943	16397	0.991
BCL2L1	-6.38	12	-1.58	0.0571	834	0.978	0.943	16396	0.991
CELF4	-6.38	12	-1.58	0.0572	835	0.978	0.943	16395	0.991
SLX4	-6.38	12	-1.58	0.0572	836	0.978	0.943	16394	0.991
STX5	-6.38	12	-1.58	0.0572	837	0.978	0.943	16393	0.991
DNAJA2	-6.38	12	-1.58	0.0573	838	0.978	0.943	16392	0.991
SUMF2	-6.38	12	-1.58	0.0573	839	0.978	0.943	16391	0.991
SLX4IP	-6.38	12	-1.58	0.0574	840	0.978	0.943	16390	0.991
NUDC	-4.5	6	-1.58	0.0576	841	0.978	0.942	16389	0.991
GSG2	-6.37	12	-1.57	0.0577	842	0.978	0.942	16388	0.991
BACH1	-6.37	12	-1.57	0.0577	843	0.978	0.942	16387	0.991
GMNN	-3.67	4	-1.57	0.0579	844	0.978	0.942	16386	0.991
CRYGA	-6.36	12	-1.57	0.0579	845	0.978	0.942	16385	0.991
SPTBN2	-6.36	12	-1.57	0.0579	846	0.978	0.942	16384	0.991
PLEKHB1	-6.36	12	-1.57	0.058	847	0.978	0.942	16383	0.991
RIF1	-6.35	12	-1.57	0.058	848	0.978	0.942	16382	0.991
FGF14	-6.35	12	-1.57	0.0581	849	0.978	0.942	16381	0.991
DDO	-6.35	12	-1.57	0.0583	850	0.978	0.942	16380	0.991
CALHM1	-6.34	12	-1.57	0.0584	851	0.978	0.942	16379	0.99
FN3K	-6.34	12	-1.57	0.0585	852	0.978	0.941	16378	0.99
MAPK8	-6.34	12	-1.57	0.0586	853	0.978	0.941	16377	0.99
CRLF3	-6.34	12	-1.57	0.0586	854	0.978	0.941	16376	0.99
NOB1	-4.48	6	-1.57	0.0586	855	0.978	0.941	16375	0.99
SYT2	-6.34	12	-1.57	0.0586	856	0.978	0.941	16374	0.99
PDCD6	-6.33	12	-1.57	0.0587	857	0.978	0.941	16373	0.99
KLF16	-6.33	12	-1.57	0.0587	858	0.978	0.941	16372	0.99
SON	-6.33	12	-1.56	0.0588	859	0.978	0.941	16371	0.99
FAM104B	-2.58	2	-1.56	0.0589	860	0.978	0.941	16370	0.99
ZNF281	-6.33	12	-1.56	0.0589	861	0.978	0.941	16369	0.99
SEPT4	-6.32	12	-1.56	0.059	862	0.978	0.941	16368	0.99
CCDC64B	-6.32	12	-1.56	0.059	863	0.978	0.941	16367	0.99
WWC2	-6.32	12	-1.56	0.059	864	0.978	0.941	16366	0.99
C11orf88	-5.16	8	-1.56	0.0591	865	0.978	0.941	16365	0.99
THEMIS	-5.76	10	-1.56	0.0593	866	0.978	0.941	16364	0.99
CACNG6	-6.31	12	-1.56	0.0594	867	0.978	0.941	16363	0.99
DLG4	-6.04	11	-1.56	0.0594	868	0.978	0.941	16362	0.99
CXCL6	-3.64	4	-1.56	0.0595	869	0.978	0.94	16361	0.99
TMEM51	-6.3	12	-1.56	0.0597	870	0.978	0.94	16360	0.99
ZNF521	-6.3	12	-1.56	0.0597	871	0.978	0.94	16359	0.99
DCX	-6.3	12	-1.56	0.0598	872	0.978	0.94	16358	0.99
FXYD7	-4.45	6	-1.56	0.06	873	0.978	0.94	16357	0.99
GYS1	-6.29	12	-1.56	0.06	874	0.978	0.94	16356	0.99
ZNF606	-5.74	10	-1.55	0.06	875	0.978	0.94	16355	0.99
RABGEF1	-3.63	4	-1.55	0.06	876	0.978	0.94	16354	0.99
GALR1	-6.29	12	-1.55	0.06	877	0.978	0.94	16353	0.99
OR5AU1	-5.74	10	-1.55	0.0601	878	0.978	0.94	16352	0.99
EIF5B	-6.29	12	-1.55	0.0602	879	0.978	0.94	16351	0.99
FZD9	-5.74	10	-1.55	0.0602	880	0.978	0.94	16350	0.99
FBXO28	-6.28	12	-1.55	0.0603	881	0.978	0.94	16349	0.99
C17orf50	-6.28	12	-1.55	0.0603	882	0.978	0.94	16348	0.99
PLD4	-6.28	12	-1.55	0.0604	883	0.978	0.94	16347	0.99
MPPE1	-6.28	12	-1.55	0.0605	884	0.978	0.94	16346	0.99
PTPRG	-6.27	12	-1.55	0.0607	885	0.978	0.939	16345	0.99
ARHGEF18	-6.27	12	-1.55	0.0608	886	0.978	0.939	16344	0.99
POLB	-6.26	12	-1.55	0.0608	887	0.978	0.939	16343	0.99
OR11A1	-3.62	4	-1.55	0.0608	888	0.978	0.939	16342	0.99
C20orf112	-6.26	12	-1.55	0.0609	889	0.978	0.939	16341	0.99
CKMT2	-6.26	12	-1.55	0.0609	890	0.978	0.939	16340	0.99
FAU	-3.61	4	-1.55	0.061	891	0.978	0.939	16339	0.99
KCMF1	-6.26	12	-1.55	0.061	892	0.978	0.939	16338	0.99
PIWIL3	-6.26	12	-1.55	0.061	893	0.978	0.939	16337	0.99
TRIM16	-4.42	6	-1.54	0.0612	894	0.978	0.939	16336	0.99
TSPAN9	-6.25	12	-1.54	0.0613	895	0.978	0.939	16335	0.99
TMEM160	-6.25	12	-1.54	0.0613	896	0.978	0.939	16334	0.99
ZDHHC23	-6.25	12	-1.54	0.0613	897	0.978	0.939	16333	0.99
SEPT6	-6.25	12	-1.54	0.0613	898	0.978	0.939	16332	0.99
ZNF41	-4.42	6	-1.54	0.0614	899	0.978	0.939	16331	0.99
ULK3	-6.25	12	-1.54	0.0614	900	0.978	0.939	16330	0.99
SMARCAL1	-6.25	12	-1.54	0.0615	901	0.978	0.939	16329	0.99
PDP1	-5.7	10	-1.54	0.0615	902	0.978	0.938	16328	0.99
NLRP6	-6.24	12	-1.54	0.0616	903	0.978	0.938	16327	0.99
C1orf115	-6.24	12	-1.54	0.0616	904	0.978	0.938	16326	0.99
DNAH2	-6.24	12	-1.54	0.0616	905	0.978	0.938	16325	0.99
ZNF236	-6.24	12	-1.54	0.0617	906	0.978	0.938	16324	0.99
AKAP4	-6.24	12	-1.54	0.0617	907	0.978	0.938	16323	0.99
C11orf89	-6.24	12	-1.54	0.0617	908	0.978	0.938	16322	0.99
PLLP	-5.69	10	-1.54	0.0617	909	0.978	0.938	16321	0.99
ANKRD35	-6.23	12	-1.54	0.0618	910	0.978	0.938	16320	0.99
NBN	-5.09	8	-1.54	0.0618	911	0.978	0.938	16319	0.99
NARFL	-6.23	12	-1.54	0.0619	912	0.978	0.938	16318	0.99
HECTD3	-6.23	12	-1.54	0.062	913	0.978	0.938	16317	0.99
TFPT	-5.96	11	-1.54	0.0621	914	0.978	0.938	16316	0.99
CEP192	-6.21	12	-1.53	0.0626	915	0.978	0.937	16315	0.99
UTP14A	-6.21	12	-1.53	0.0627	916	0.978	0.937	16314	0.99
APOL1	-5.66	10	-1.53	0.0628	917	0.978	0.937	16313	0.99
TMEM194B	-5.66	10	-1.53	0.0629	918	0.978	0.937	16312	0.99
COQ6	-6.2	12	-1.53	0.0629	919	0.978	0.937	16311	0.99
AMIGO3	-6.2	12	-1.53	0.0629	920	0.978	0.937	16310	0.99
RABGAP1L	-6.2	12	-1.53	0.063	921	0.978	0.937	16309	0.99
KCTD4	-5.66	10	-1.53	0.0631	922	0.978	0.937	16308	0.99
PRDX2	-3.58	4	-1.53	0.0631	923	0.978	0.937	16307	0.99
TRAPPC10	-6.19	12	-1.53	0.0631	924	0.978	0.937	16306	0.99
PTPRK	-6.19	12	-1.53	0.0631	925	0.978	0.937	16305	0.99
AKNA	-6.19	12	-1.53	0.0632	926	0.978	0.937	16304	0.99
GFOD1	-6.19	12	-1.53	0.0632	927	0.978	0.937	16303	0.99
MAP3K4	-6.19	12	-1.53	0.0632	928	0.978	0.937	16302	0.99
ITPR3	-6.19	12	-1.53	0.0632	929	0.978	0.937	16301	0.99
CHGB	-6.19	12	-1.53	0.0633	930	0.978	0.937	16300	0.99
PKP2	-6.19	12	-1.53	0.0633	931	0.978	0.937	16299	0.99
FAM114A2	-5.65	10	-1.53	0.0634	932	0.978	0.937	16298	0.99
IRX4	-6.18	12	-1.53	0.0634	933	0.978	0.937	16297	0.99
TMEM182	-5.05	8	-1.53	0.0635	934	0.978	0.937	16296	0.99
LHFPL5	-6.18	12	-1.53	0.0636	935	0.978	0.936	16295	0.99
F10	-6.18	12	-1.53	0.0636	936	0.978	0.936	16294	0.99
NABP2	-5.63	10	-1.52	0.0638	937	0.978	0.936	16293	0.99
TAF6L	-6.17	12	-1.52	0.0638	938	0.978	0.936	16292	0.99
B3GALT5	-5.04	8	-1.52	0.0639	939	0.978	0.936	16291	0.99
GABRA3	-6.17	12	-1.52	0.0639	940	0.978	0.936	16290	0.99
ADCY10	-6.17	12	-1.52	0.0639	941	0.978	0.936	16289	0.99
TMEM14E	-4.36	6	-1.52	0.064	942	0.978	0.936	16288	0.99
EME1	-6.16	12	-1.52	0.0642	943	0.978	0.936	16287	0.99
C9	-5.03	8	-1.52	0.0642	944	0.978	0.936	16286	0.99
NT5C3B	-6.16	12	-1.52	0.0643	945	0.978	0.936	16285	0.99
SSSCA1	-6.16	12	-1.52	0.0643	946	0.978	0.936	16284	0.99
GRB10	-6.16	12	-1.52	0.0643	947	0.978	0.936	16283	0.99
KLHL6	-6.15	12	-1.52	0.0644	948	0.978	0.936	16282	0.99
PDZD7	-6.15	12	-1.52	0.0645	949	0.978	0.936	16281	0.99
DDX5	-6.15	12	-1.52	0.0645	950	0.978	0.935	16280	0.99
STRAP	-2.51	2	-1.52	0.0647	951	0.978	0.935	16279	0.99
LTB4R2	-6.14	12	-1.52	0.0648	952	0.978	0.935	16278	0.99
COL18A1	-6.14	12	-1.52	0.0648	953	0.978	0.935	16277	0.99
NUDT5	-5.01	8	-1.51	0.0649	954	0.978	0.935	16276	0.99
SNAI1	-5.6	10	-1.51	0.0649	955	0.978	0.935	16275	0.99
CSTF3	-5.87	11	-1.51	0.0651	956	0.978	0.935	16274	0.99
DNAL1	-5.59	10	-1.51	0.0654	957	0.978	0.935	16273	0.99
CLIC1	-5	8	-1.51	0.0655	958	0.978	0.934	16272	0.989
ARSF	-6.12	12	-1.51	0.0655	959	0.978	0.934	16271	0.989
SLC35E3	-6.12	12	-1.51	0.0657	960	0.978	0.934	16270	0.989
PCGF1	-6.11	12	-1.51	0.0659	961	0.978	0.934	16269	0.989
RORC	-6.11	12	-1.51	0.0659	962	0.978	0.934	16268	0.989
DKK2	-6.11	12	-1.51	0.066	963	0.978	0.934	16267	0.989
TGM5	-6.1	12	-1.51	0.0662	964	0.978	0.934	16266	0.989
ARHGAP11A	-4.31	6	-1.5	0.0662	965	0.978	0.934	16265	0.989
RPL8	-4.31	6	-1.5	0.0663	966	0.978	0.934	16264	0.989
LY6G6F	-6.1	12	-1.5	0.0663	967	0.978	0.934	16263	0.989
NBEAL1	-6.1	12	-1.5	0.0664	968	0.978	0.934	16262	0.989
MAGEA1	-2.49	2	-1.5	0.0664	969	0.978	0.934	16261	0.989
CCL18	-4.31	6	-1.5	0.0664	970	0.978	0.934	16260	0.989
PVRL3	-6.09	12	-1.5	0.0665	971	0.978	0.934	16259	0.989
PNKP	-6.09	12	-1.5	0.0665	972	0.978	0.933	16258	0.989
MPZL1	-3.51	4	-1.5	0.0669	973	0.978	0.933	16257	0.989
PPAN	-6.08	12	-1.5	0.0669	974	0.978	0.933	16256	0.989
KCNK3	-6.07	12	-1.5	0.0672	975	0.978	0.933	16255	0.989
ZNF395	-6.06	12	-1.49	0.0675	976	0.978	0.933	16254	0.988
KIAA1211L	-6.06	12	-1.49	0.0675	977	0.978	0.932	16253	0.988
PIK3AP1	-6.06	12	-1.49	0.0675	978	0.978	0.932	16252	0.988
VPS37D	-6.06	12	-1.49	0.0676	979	0.978	0.932	16251	0.988
SAMD10	-6.06	12	-1.49	0.0676	980	0.978	0.932	16250	0.988
VASH1	-6.05	12	-1.49	0.0679	981	0.978	0.932	16249	0.988
SEPHS1	-4.94	8	-1.49	0.0679	982	0.978	0.932	16248	0.988
ZNF710	-6.05	12	-1.49	0.0679	983	0.978	0.932	16247	0.988
KRT79	-6.05	12	-1.49	0.068	984	0.978	0.932	16246	0.988
SPANXD	-2.47	2	-1.49	0.0682	985	0.978	0.932	16245	0.988
PDZD11	-2.47	2	-1.49	0.0683	986	0.978	0.932	16244	0.988
ADAMTS8	-6.04	12	-1.49	0.0683	987	0.978	0.932	16243	0.988
SNIP1	-5.78	11	-1.49	0.0683	988	0.978	0.932	16242	0.988
CLSTN3	-6.04	12	-1.49	0.0684	989	0.978	0.932	16241	0.988
ATP6V0E2	-6.04	12	-1.49	0.0684	990	0.978	0.932	16240	0.988
COL8A2	-5.51	10	-1.49	0.0685	991	0.978	0.932	16239	0.988
ZNF556	-5.51	10	-1.49	0.0685	992	0.978	0.931	16238	0.988
RNLS	-6.03	12	-1.49	0.0685	993	0.978	0.931	16237	0.988
KIAA1210	-6.03	12	-1.49	0.0686	994	0.978	0.931	16236	0.988
NWD1	-6.03	12	-1.49	0.0686	995	0.978	0.931	16235	0.988
THOC7	-2.46	2	-1.49	0.0686	996	0.978	0.931	16234	0.988
LRRC14B	-6.03	12	-1.48	0.0688	997	0.978	0.931	16233	0.988
WNT7A	-6.03	12	-1.48	0.0688	998	0.978	0.931	16232	0.988
RARG	-6.02	12	-1.48	0.0689	999	0.978	0.931	16231	0.988
FAM196A	-5.5	10	-1.48	0.0689	1000	0.978	0.931	16230	0.988
TEKT1	-6.02	12	-1.48	0.0689	1001	0.978	0.931	16229	0.988
UFM1	-3.48	4	-1.48	0.069	1002	0.978	0.931	16228	0.988
CEACAM21	-5.49	10	-1.48	0.0691	1003	0.978	0.931	16227	0.988
ITIH2	-6.01	12	-1.48	0.0692	1004	0.978	0.931	16226	0.988
DHFR	-4.25	6	-1.48	0.0692	1005	0.978	0.931	16225	0.988
GPR39	-6.01	12	-1.48	0.0692	1006	0.978	0.931	16224	0.988
ZBTB4	-6.01	12	-1.48	0.0693	1007	0.978	0.931	16223	0.988
PDE7B	-6.01	12	-1.48	0.0693	1008	0.978	0.931	16222	0.988
ZCCHC11	-6.01	12	-1.48	0.0694	1009	0.978	0.931	16221	0.988
SSNA1	-5.48	10	-1.48	0.0695	1010	0.978	0.931	16220	0.988
OSBPL8	-6.01	12	-1.48	0.0695	1011	0.978	0.931	16219	0.988
B3GNT4	-5.48	10	-1.48	0.0696	1012	0.978	0.93	16218	0.988
CSTL1	-4.89	8	-1.48	0.0699	1013	0.978	0.93	16217	0.988
RBM19	-5.99	12	-1.47	0.0701	1014	0.978	0.93	16216	0.988
GJD3	-5.98	12	-1.47	0.0705	1015	0.978	0.93	16215	0.988
KIAA1199	-5.98	12	-1.47	0.0705	1016	0.978	0.93	16214	0.988
VSX2	-5.98	12	-1.47	0.0705	1017	0.978	0.93	16213	0.988
FBXO27	-5.97	12	-1.47	0.0706	1018	0.978	0.929	16212	0.988
MED25	-5.97	12	-1.47	0.0707	1019	0.978	0.929	16211	0.988
NADSYN1	-5.97	12	-1.47	0.0707	1020	0.978	0.929	16210	0.988
RNF168	-5.97	12	-1.47	0.0707	1021	0.978	0.929	16209	0.988
CHST14	-5.45	10	-1.47	0.0708	1022	0.978	0.929	16208	0.988
ITPRIPL2	-5.45	10	-1.47	0.0708	1023	0.978	0.929	16207	0.988
PDHA1	-5.97	12	-1.47	0.0709	1024	0.978	0.929	16206	0.988
CLUH	-5.96	12	-1.47	0.0709	1025	0.978	0.929	16205	0.988
PTP4A3	-5.96	12	-1.47	0.071	1026	0.978	0.929	16204	0.988
C4orf21	-5.96	12	-1.47	0.071	1027	0.978	0.929	16203	0.988
ZSWIM7	-3.44	4	-1.47	0.071	1028	0.978	0.929	16202	0.988
FAM89A	-5.96	12	-1.47	0.0711	1029	0.978	0.929	16201	0.988
TGM2	-5.95	12	-1.47	0.0713	1030	0.978	0.929	16200	0.988
ERCC1	-5.95	12	-1.47	0.0714	1031	0.978	0.929	16199	0.988
FBRSL1	-5.95	12	-1.46	0.0715	1032	0.978	0.928	16198	0.988
TBX1	-5.95	12	-1.46	0.0715	1033	0.978	0.928	16197	0.988
OCEL1	-5.95	12	-1.46	0.0716	1034	0.978	0.928	16196	0.988
CNOT6	-5.94	12	-1.46	0.0717	1035	0.978	0.928	16195	0.988
OR2W1	-2.43	2	-1.46	0.0717	1036	0.978	0.928	16194	0.988
ZMYM4	-5.94	12	-1.46	0.0717	1037	0.978	0.928	16193	0.988
ETS2	-5.94	12	-1.46	0.0719	1038	0.978	0.928	16192	0.988
LRRC61	-5.42	10	-1.46	0.0719	1039	0.978	0.928	16191	0.988
ZNF18	-5.94	12	-1.46	0.0719	1040	0.978	0.928	16190	0.988
DNALI1	-5.94	12	-1.46	0.0719	1041	0.978	0.928	16189	0.988
BMI1	-3.43	4	-1.46	0.072	1042	0.978	0.928	16188	0.988
ONECUT1	-5.42	10	-1.46	0.072	1043	0.978	0.928	16187	0.988
MSRA	-5.93	12	-1.46	0.0721	1044	0.978	0.928	16186	0.988
GREB1L	-5.93	12	-1.46	0.0721	1045	0.978	0.928	16185	0.988
UFSP2	-5.93	12	-1.46	0.0721	1046	0.978	0.928	16184	0.988
SOX30	-5.93	12	-1.46	0.0722	1047	0.978	0.928	16183	0.988
STRIP2	-5.93	12	-1.46	0.0722	1048	0.978	0.928	16182	0.988
C2orf53	-5.93	12	-1.46	0.0722	1049	0.978	0.928	16181	0.988
SCGB1C1	-4.84	8	-1.46	0.0723	1050	0.978	0.928	16180	0.988
ASPDH	-5.93	12	-1.46	0.0723	1051	0.978	0.928	16179	0.988
PIF1	-5.93	12	-1.46	0.0723	1052	0.978	0.928	16178	0.988
ECHDC3	-5.41	10	-1.46	0.0724	1053	0.978	0.928	16177	0.988
DIP2C	-5.92	12	-1.46	0.0724	1054	0.978	0.928	16176	0.988
GJB1	-4.84	8	-1.46	0.0725	1055	0.978	0.928	16175	0.988
PPM1F	-5.92	12	-1.46	0.0726	1056	0.978	0.927	16174	0.988
SRPR	-5.92	12	-1.46	0.0726	1057	0.978	0.927	16173	0.988
HAUS5	-5.92	12	-1.46	0.0726	1058	0.978	0.927	16172	0.988
STK3	-5.91	12	-1.45	0.0728	1059	0.978	0.927	16171	0.988
COX7A2L	-3.41	4	-1.45	0.0729	1060	0.978	0.927	16170	0.988
ALDH4A1	-5.91	12	-1.45	0.0729	1061	0.978	0.927	16169	0.988
RQCD1	-5.91	12	-1.45	0.073	1062	0.978	0.927	16168	0.988
PRDM11	-5.91	12	-1.45	0.0731	1063	0.978	0.927	16167	0.988
CAPN13	-5.91	12	-1.45	0.0731	1064	0.978	0.927	16166	0.988
HOXC12	-5.9	12	-1.45	0.0732	1065	0.978	0.927	16165	0.988
XRN2	-5.65	11	-1.45	0.0733	1066	0.978	0.927	16164	0.988
FAM151B	-5.9	12	-1.45	0.0733	1067	0.978	0.927	16163	0.988
NOXO1	-5.9	12	-1.45	0.0733	1068	0.978	0.927	16162	0.988
GXYLT1	-4.82	8	-1.45	0.0733	1069	0.978	0.927	16161	0.988
GIMAP8	-5.9	12	-1.45	0.0734	1070	0.978	0.927	16160	0.988
CDHR1	-5.89	12	-1.45	0.0735	1071	0.978	0.927	16159	0.988
CREB3L1	-5.89	12	-1.45	0.0735	1072	0.978	0.926	16158	0.988
FABP7	-3.4	4	-1.45	0.0736	1073	0.978	0.926	16157	0.988
TPBG	-5.89	12	-1.45	0.0736	1074	0.978	0.926	16156	0.988
TSC22D1	-5.89	12	-1.45	0.0737	1075	0.978	0.926	16155	0.988
AKT1S1	-5.89	12	-1.45	0.0737	1076	0.978	0.926	16154	0.988
PANK4	-5.89	12	-1.45	0.0738	1077	0.978	0.926	16153	0.988
PTPRN2	-5.89	12	-1.45	0.0738	1078	0.978	0.926	16152	0.988
KIAA1161	-5.37	10	-1.45	0.0739	1079	0.978	0.926	16151	0.988
C2orf88	-3.4	4	-1.45	0.074	1080	0.978	0.926	16150	0.988
CECR6	-5.37	10	-1.45	0.074	1081	0.978	0.926	16149	0.988
DNTTIP2	-5.63	11	-1.45	0.0741	1082	0.978	0.926	16148	0.988
HK3	-5.88	12	-1.45	0.0741	1083	0.978	0.926	16147	0.988
T	-5.87	12	-1.45	0.0742	1084	0.978	0.926	16146	0.988
IGSF11	-5.87	12	-1.44	0.0744	1085	0.978	0.926	16145	0.988
RANGAP1	-5.62	11	-1.44	0.0744	1086	0.978	0.926	16144	0.988
FBRS	-5.87	12	-1.44	0.0745	1087	0.978	0.926	16143	0.988
ANKRD63	-5.86	12	-1.44	0.0746	1088	0.978	0.925	16142	0.988
GPR176	-5.86	12	-1.44	0.0746	1089	0.978	0.925	16141	0.988
GPR12	-5.86	12	-1.44	0.0748	1090	0.978	0.925	16140	0.988
IFT172	-5.86	12	-1.44	0.0749	1091	0.978	0.925	16139	0.988
SIRPB1	-5.34	10	-1.44	0.075	1092	0.978	0.925	16138	0.988
CHDH	-5.85	12	-1.44	0.075	1093	0.978	0.925	16137	0.988
NONO	-4.14	6	-1.44	0.075	1094	0.978	0.925	16136	0.988
PDE2A	-5.85	12	-1.44	0.0751	1095	0.978	0.925	16135	0.988
APP	-5.85	12	-1.44	0.0751	1096	0.978	0.925	16134	0.988
RABEPK	-5.85	12	-1.44	0.0752	1097	0.978	0.925	16133	0.988
HIPK4	-5.85	12	-1.44	0.0752	1098	0.978	0.925	16132	0.988
POLQ	-5.85	12	-1.44	0.0752	1099	0.978	0.925	16131	0.988
AP1G2	-5.85	12	-1.44	0.0753	1100	0.978	0.925	16130	0.988
FAM46C	-4.77	8	-1.44	0.0753	1101	0.978	0.925	16129	0.988
RGS4	-5.84	12	-1.44	0.0754	1102	0.978	0.925	16128	0.988
METTL2A	-2.39	2	-1.44	0.0754	1103	0.978	0.925	16127	0.988
C6orf201	-5.33	10	-1.44	0.0754	1104	0.978	0.925	16126	0.988
TXNRD3NB	-4.77	8	-1.44	0.0755	1105	0.978	0.925	16125	0.988
C15orf62	-5.33	10	-1.44	0.0756	1106	0.978	0.924	16124	0.988
LRRC43	-5.84	12	-1.44	0.0756	1107	0.978	0.924	16123	0.988
HES7	-5.84	12	-1.44	0.0756	1108	0.978	0.924	16122	0.988
PITPNM2	-5.84	12	-1.44	0.0756	1109	0.978	0.924	16121	0.988
CREB3L3	-5.84	12	-1.43	0.0757	1110	0.978	0.924	16120	0.988
CCNC	-2.38	2	-1.43	0.0757	1111	0.978	0.924	16119	0.988
HEBP2	-5.83	12	-1.43	0.0757	1112	0.978	0.924	16118	0.988
OR51Q1	-5.32	10	-1.43	0.0758	1113	0.978	0.924	16117	0.988
RDH5	-5.83	12	-1.43	0.0758	1114	0.978	0.924	16116	0.988
STAU1	-5.83	12	-1.43	0.076	1115	0.978	0.924	16115	0.988
PCYT1A	-5.83	12	-1.43	0.076	1116	0.978	0.924	16114	0.988
RNASE8	-3.36	4	-1.43	0.076	1117	0.978	0.924	16113	0.988
TMEM141	-4.12	6	-1.43	0.076	1118	0.978	0.924	16112	0.988
PEF1	-5.82	12	-1.43	0.0761	1119	0.978	0.924	16111	0.988
PTGER4	-5.31	10	-1.43	0.0763	1120	0.978	0.924	16110	0.988
PAN2	-5.82	12	-1.43	0.0763	1121	0.978	0.924	16109	0.988
ENOSF1	-5.82	12	-1.43	0.0763	1122	0.978	0.924	16108	0.988
RALB	-5.82	12	-1.43	0.0764	1123	0.978	0.924	16107	0.988
UTS2R	-5.82	12	-1.43	0.0764	1124	0.978	0.924	16106	0.988
DDX20	-5.81	12	-1.43	0.0765	1125	0.978	0.923	16105	0.988
CXXC4	-5.81	12	-1.43	0.0766	1126	0.978	0.923	16104	0.988
FGF4	-5.81	12	-1.43	0.0767	1127	0.978	0.923	16103	0.988
DCAF12L1	-5.3	10	-1.43	0.0767	1128	0.978	0.923	16102	0.988
KIAA1107	-5.81	12	-1.43	0.0768	1129	0.978	0.923	16101	0.988
CYP27C1	-5.81	12	-1.43	0.0768	1130	0.978	0.923	16100	0.988
CYP27A1	-5.8	12	-1.43	0.0768	1131	0.978	0.923	16099	0.988
TDRD10	-5.8	12	-1.42	0.0771	1132	0.978	0.923	16098	0.988
SMYD3	-5.8	12	-1.42	0.0771	1133	0.978	0.923	16097	0.988
PPP1R3D	-5.79	12	-1.42	0.0772	1134	0.978	0.923	16096	0.988
SCRN2	-5.55	11	-1.42	0.0773	1135	0.978	0.923	16095	0.988
MCCC1	-5.79	12	-1.42	0.0774	1136	0.978	0.923	16094	0.988
CTAGE5	-4.73	8	-1.42	0.0775	1137	0.978	0.923	16093	0.988
GTF2B	-5.79	12	-1.42	0.0775	1138	0.978	0.923	16092	0.988
RPS24	-5.28	10	-1.42	0.0775	1139	0.978	0.923	16091	0.988
SERPINE1	-5.79	12	-1.42	0.0775	1140	0.978	0.923	16090	0.988
EVX1	-5.79	12	-1.42	0.0775	1141	0.978	0.922	16089	0.988
OR1A2	-2.36	2	-1.42	0.0776	1142	0.978	0.922	16088	0.988
CCNG2	-4.09	6	-1.42	0.0777	1143	0.978	0.922	16087	0.988
LPHN1	-5.78	12	-1.42	0.0777	1144	0.978	0.922	16086	0.988
TM6SF2	-5.78	12	-1.42	0.0777	1145	0.978	0.922	16085	0.988
BICD2	-5.78	12	-1.42	0.0778	1146	0.978	0.922	16084	0.988
UPK1B	-5.27	10	-1.42	0.0779	1147	0.978	0.922	16083	0.988
FAT2	-5.78	12	-1.42	0.0779	1148	0.978	0.922	16082	0.988
CHFR	-5.77	12	-1.42	0.078	1149	0.978	0.922	16081	0.988
SCIN	-5.77	12	-1.42	0.078	1150	0.978	0.922	16080	0.988
PPIB	-5.77	12	-1.42	0.078	1151	0.978	0.922	16079	0.988
BAHD1	-5.77	12	-1.42	0.078	1152	0.978	0.922	16078	0.988
SASH3	-5.77	12	-1.42	0.078	1153	0.978	0.922	16077	0.988
STPG1	-5.77	12	-1.42	0.078	1154	0.978	0.922	16076	0.988
ZNF703	-5.77	12	-1.42	0.0782	1155	0.978	0.922	16075	0.988
WIZ	-5.77	12	-1.42	0.0783	1156	0.978	0.922	16074	0.988
NAGLU	-5.76	12	-1.42	0.0784	1157	0.978	0.922	16073	0.988
GTSE1	-5.76	12	-1.41	0.0786	1158	0.978	0.921	16072	0.988
GTF2H1	-2.35	2	-1.41	0.0786	1159	0.978	0.921	16071	0.988
CDK5	-5.25	10	-1.41	0.0787	1160	0.978	0.921	16070	0.988
ACTRT3	-5.76	12	-1.41	0.0787	1161	0.978	0.921	16069	0.988
DEGS2	-5.75	12	-1.41	0.0788	1162	0.978	0.921	16068	0.988
GGA1	-5.51	11	-1.41	0.0788	1163	0.978	0.921	16067	0.988
HIF3A	-5.75	12	-1.41	0.0788	1164	0.978	0.921	16066	0.988
CCT8L2	-2.35	2	-1.41	0.0789	1165	0.978	0.921	16065	0.988
OR1B1	-5.25	10	-1.41	0.0789	1166	0.978	0.921	16064	0.988
HIPK2	-5.75	12	-1.41	0.079	1167	0.978	0.921	16063	0.988
PSMB9	-5.75	12	-1.41	0.079	1168	0.978	0.921	16062	0.988
DCDC2	-5.75	12	-1.41	0.0791	1169	0.978	0.921	16061	0.988
ALDH9A1	-5.75	12	-1.41	0.0791	1170	0.978	0.921	16060	0.988
ILF3	-5.5	11	-1.41	0.0792	1171	0.978	0.921	16059	0.988
PPARD	-5.74	12	-1.41	0.0792	1172	0.978	0.921	16058	0.988
HSPB2	-5.74	12	-1.41	0.0793	1173	0.978	0.921	16057	0.988
ZNF584	-5.74	12	-1.41	0.0793	1174	0.978	0.921	16056	0.988
LRRC6	-2.34	2	-1.41	0.0794	1175	0.978	0.921	16055	0.988
TECPR1	-5.73	12	-1.41	0.0795	1176	0.978	0.92	16054	0.988
SYT4	-4.68	8	-1.41	0.0797	1177	0.978	0.92	16053	0.988
FAM83E	-5.73	12	-1.41	0.0797	1178	0.978	0.92	16052	0.988
TNFRSF18	-5.73	12	-1.41	0.0797	1179	0.978	0.92	16051	0.988
RBX1	-2.34	2	-1.41	0.0797	1180	0.978	0.92	16050	0.988
INSR	-5.73	12	-1.41	0.0798	1181	0.978	0.92	16049	0.988
MRI1	-5.73	12	-1.41	0.0799	1182	0.978	0.92	16048	0.988
EPS15L1	-5.72	12	-1.41	0.0799	1183	0.978	0.92	16047	0.988
ZDHHC13	-5.22	10	-1.4	0.08	1184	0.978	0.92	16046	0.988
RASEF	-5.72	12	-1.4	0.08	1185	0.978	0.92	16045	0.988
TRIM14	-5.72	12	-1.4	0.0801	1186	0.978	0.92	16044	0.988
OR1Q1	-2.33	2	-1.4	0.0803	1187	0.978	0.92	16043	0.988
MOCS2	-3.3	4	-1.4	0.0803	1188	0.978	0.92	16042	0.988
CST2	-2.33	2	-1.4	0.0803	1189	0.978	0.92	16041	0.988
CDKL2	-5.71	12	-1.4	0.0804	1190	0.978	0.92	16040	0.988
TLR2	-5.21	10	-1.4	0.0805	1191	0.978	0.92	16039	0.988
NHP2	-2.33	2	-1.4	0.0805	1192	0.978	0.92	16038	0.988
JDP2	-4.66	8	-1.4	0.0807	1193	0.978	0.919	16037	0.988
FOXD1	-4.66	8	-1.4	0.0807	1194	0.978	0.919	16036	0.988
KLF2	-5.7	12	-1.4	0.0808	1195	0.978	0.919	16035	0.988
ANKRD37	-5.2	10	-1.4	0.0808	1196	0.978	0.919	16034	0.988
PRKAG2	-5.7	12	-1.4	0.0808	1197	0.978	0.919	16033	0.988
HNF4G	-5.7	12	-1.4	0.0808	1198	0.978	0.919	16032	0.988
IDH1	-2.33	2	-1.4	0.0809	1199	0.978	0.919	16031	0.988
NXT1	-4.03	6	-1.4	0.081	1200	0.978	0.919	16030	0.988
NOP14	-5.7	12	-1.4	0.081	1201	0.978	0.919	16029	0.988
NR3C1	-5.69	12	-1.4	0.0811	1202	0.978	0.919	16028	0.988
GLE1	-5.69	12	-1.4	0.0811	1203	0.978	0.919	16027	0.988
STK17B	-4.02	6	-1.4	0.0812	1204	0.978	0.919	16026	0.988
MAGI2	-5.69	12	-1.4	0.0812	1205	0.978	0.919	16025	0.988
ARHGAP15	-4.64	8	-1.4	0.0813	1206	0.978	0.919	16024	0.988
CDK12	-5.69	12	-1.4	0.0813	1207	0.978	0.919	16023	0.988
ASNSD1	-5.69	12	-1.4	0.0814	1208	0.978	0.919	16022	0.988
SOX2	-5.69	12	-1.4	0.0814	1209	0.978	0.919	16021	0.988
SLC2A4	-5.69	12	-1.4	0.0814	1210	0.978	0.919	16020	0.988
HTR5A	-5.19	10	-1.4	0.0814	1211	0.978	0.919	16019	0.988
BIRC7	-5.68	12	-1.4	0.0815	1212	0.978	0.919	16018	0.988
KAT5	-5.44	11	-1.39	0.0816	1213	0.978	0.918	16017	0.988
GYG2	-5.68	12	-1.39	0.0816	1214	0.978	0.918	16016	0.988
KRTAP13-3	-2.32	2	-1.39	0.0818	1215	0.978	0.918	16015	0.988
RBM22	-5.67	12	-1.39	0.0819	1216	0.978	0.918	16014	0.988
OR51F1	-4.01	6	-1.39	0.0819	1217	0.978	0.918	16013	0.988
SOAT2	-5.67	12	-1.39	0.0819	1218	0.978	0.918	16012	0.988
NUP37	-4.01	6	-1.39	0.082	1219	0.978	0.918	16011	0.988
EDC3	-5.67	12	-1.39	0.0821	1220	0.978	0.918	16010	0.988
ARFGAP3	-5.67	12	-1.39	0.0821	1221	0.978	0.918	16009	0.988
SDF2L1	-5.67	12	-1.39	0.0821	1222	0.978	0.918	16008	0.988
ATP6V1E2	-4.63	8	-1.39	0.0821	1223	0.978	0.918	16007	0.988
ELAVL3	-5.66	12	-1.39	0.0823	1224	0.978	0.918	16006	0.988
PPM1H	-5.66	12	-1.39	0.0824	1225	0.978	0.918	16005	0.988
TNFSF4	-5.17	10	-1.39	0.0825	1226	0.978	0.917	16004	0.988
TRADD	-5.66	12	-1.39	0.0826	1227	0.978	0.917	16003	0.988
CYP4F11	-5.66	12	-1.39	0.0826	1228	0.978	0.917	16002	0.988
H2AFX	-4	6	-1.39	0.0826	1229	0.978	0.917	16001	0.988
SUGP1	-5.65	12	-1.39	0.0827	1230	0.978	0.917	16000	0.988
NPHS1	-5.65	12	-1.39	0.0827	1231	0.978	0.917	15999	0.988
MAGIX	-5.65	12	-1.39	0.0828	1232	0.978	0.917	15998	0.988
ICK	-5.64	12	-1.38	0.0831	1233	0.978	0.917	15997	0.988
ARHGEF40	-5.64	12	-1.38	0.0831	1234	0.978	0.917	15996	0.988
WDR45B	-5.64	12	-1.38	0.0831	1235	0.978	0.917	15995	0.988
P2RX2	-5.64	12	-1.38	0.0832	1236	0.978	0.917	15994	0.988
TLX2	-5.64	12	-1.38	0.0833	1237	0.978	0.917	15993	0.988
SPRED3	-5.64	12	-1.38	0.0833	1238	0.978	0.917	15992	0.988
DMXL1	-5.64	12	-1.38	0.0834	1239	0.978	0.917	15991	0.988
PECR	-5.64	12	-1.38	0.0834	1240	0.978	0.917	15990	0.988
VAC14	-5.63	12	-1.38	0.0835	1241	0.978	0.916	15989	0.988
ZNF100	-2.3	2	-1.38	0.0835	1242	0.978	0.916	15988	0.988
RGS16	-5.14	10	-1.38	0.0835	1243	0.978	0.916	15987	0.988
DAO	-5.63	12	-1.38	0.0836	1244	0.978	0.916	15986	0.988
THRSP	-4.6	8	-1.38	0.0836	1245	0.978	0.916	15985	0.988
DGCR2	-5.63	12	-1.38	0.0836	1246	0.978	0.916	15984	0.988
TRMT12	-5.63	12	-1.38	0.0837	1247	0.978	0.916	15983	0.988
DSC3	-5.63	12	-1.38	0.0838	1248	0.978	0.916	15982	0.988
ITFG3	-5.63	12	-1.38	0.0838	1249	0.978	0.916	15981	0.988
PRL	-5.62	12	-1.38	0.084	1250	0.978	0.916	15980	0.988
FSTL4	-5.62	12	-1.38	0.084	1251	0.978	0.916	15979	0.988
LRRC49	-5.62	12	-1.38	0.0842	1252	0.978	0.916	15978	0.988
MTSS1	-5.62	12	-1.38	0.0842	1253	0.978	0.916	15977	0.988
RBP4	-5.62	12	-1.38	0.0842	1254	0.978	0.916	15976	0.988
LRRC38	-5.62	12	-1.38	0.0842	1255	0.978	0.916	15975	0.988
PVRL4	-5.62	12	-1.38	0.0842	1256	0.978	0.916	15974	0.988
UBXN10	-5.62	12	-1.38	0.0842	1257	0.978	0.916	15973	0.988
INHBC	-5.61	12	-1.38	0.0845	1258	0.978	0.916	15972	0.988
CLCN6	-5.61	12	-1.37	0.0846	1259	0.978	0.915	15971	0.988
TNNI2	-5.12	10	-1.37	0.0847	1260	0.978	0.915	15970	0.987
COLGALT1	-5.6	12	-1.37	0.0848	1261	0.978	0.915	15969	0.987
MFHAS1	-5.11	10	-1.37	0.0849	1262	0.978	0.915	15968	0.987
SMEK1	-5.6	12	-1.37	0.0849	1263	0.978	0.915	15967	0.987
SBSN	-5.6	12	-1.37	0.0849	1264	0.978	0.915	15966	0.987
PET100	-3.96	6	-1.37	0.085	1265	0.978	0.915	15965	0.987
GRIN3B	-5.6	12	-1.37	0.085	1266	0.978	0.915	15964	0.987
SLC1A5	-5.59	12	-1.37	0.0852	1267	0.978	0.915	15963	0.987
CCDC94	-5.59	12	-1.37	0.0852	1268	0.978	0.915	15962	0.987
TIMM44	-5.59	12	-1.37	0.0852	1269	0.978	0.915	15961	0.987
LPA	-5.59	12	-1.37	0.0852	1270	0.978	0.915	15960	0.987
HSPB3	-5.1	10	-1.37	0.0853	1271	0.978	0.915	15959	0.987
MAPK11	-5.59	12	-1.37	0.0855	1272	0.978	0.915	15958	0.987
CROT	-5.59	12	-1.37	0.0855	1273	0.978	0.915	15957	0.987
RFX7	-5.59	12	-1.37	0.0855	1274	0.978	0.915	15956	0.987
NUP93	-5.58	12	-1.37	0.0855	1275	0.978	0.914	15955	0.987
POLE4	-5.58	12	-1.37	0.0856	1276	0.978	0.914	15954	0.987
EGFL7	-5.58	12	-1.37	0.0856	1277	0.978	0.914	15953	0.987
NME3	-5.58	12	-1.37	0.0856	1278	0.978	0.914	15952	0.987
SH3RF2	-5.58	12	-1.37	0.0857	1279	0.978	0.914	15951	0.987
MYO3B	-5.58	12	-1.37	0.0857	1280	0.978	0.914	15950	0.987
CDH23	-5.58	12	-1.37	0.0858	1281	0.978	0.914	15949	0.987
FAM217B	-3.94	6	-1.37	0.0859	1282	0.978	0.914	15948	0.987
FBXO33	-5.58	12	-1.37	0.0859	1283	0.978	0.914	15947	0.987
DRP2	-5.58	12	-1.37	0.0859	1284	0.978	0.914	15946	0.987
NUDT15	-2.27	2	-1.37	0.086	1285	0.978	0.914	15945	0.987
ATM	-5.57	12	-1.37	0.0861	1286	0.978	0.914	15944	0.987
ABLIM1	-5.57	12	-1.36	0.0862	1287	0.978	0.914	15943	0.987
CSNK1A1L	-4.54	8	-1.36	0.0863	1288	0.978	0.914	15942	0.987
LUZP2	-5.56	12	-1.36	0.0864	1289	0.978	0.914	15941	0.987
LRCH3	-5.56	12	-1.36	0.0866	1290	0.978	0.913	15940	0.987
TWF2	-5.56	12	-1.36	0.0866	1291	0.978	0.913	15939	0.987
AGPAT1	-5.56	12	-1.36	0.0867	1292	0.978	0.913	15938	0.987
RSPO3	-3.21	4	-1.36	0.0867	1293	0.978	0.913	15937	0.987
EPB42	-5.55	12	-1.36	0.0868	1294	0.978	0.913	15936	0.987
ZNF385A	-5.55	12	-1.36	0.0868	1295	0.978	0.913	15935	0.987
EYS	-5.55	12	-1.36	0.0869	1296	0.978	0.913	15934	0.987
MAD2L2	-5.55	12	-1.36	0.0869	1297	0.978	0.913	15933	0.987
PREB	-5.55	12	-1.36	0.0869	1298	0.978	0.913	15932	0.987
C5orf22	-4.53	8	-1.36	0.087	1299	0.978	0.913	15931	0.987
NR0B1	-5.54	12	-1.36	0.0872	1300	0.978	0.913	15930	0.987
RNF7	-3.2	4	-1.36	0.0872	1301	0.978	0.913	15929	0.987
PLEKHG2	-5.54	12	-1.36	0.0872	1302	0.978	0.913	15928	0.987
SIRT4	-5.54	12	-1.36	0.0875	1303	0.978	0.912	15927	0.987
HAAO	-5.54	12	-1.36	0.0876	1304	0.978	0.912	15926	0.987
C3orf70	-5.53	12	-1.36	0.0877	1305	0.978	0.912	15925	0.987
STARD3	-5.53	12	-1.36	0.0877	1306	0.978	0.912	15924	0.987
NTRK3	-5.53	12	-1.35	0.0877	1307	0.978	0.912	15923	0.987
AMZ2	-2.26	2	-1.35	0.0878	1308	0.978	0.912	15922	0.987
CD81	-5.53	12	-1.35	0.0879	1309	0.978	0.912	15921	0.987
TMEM201	-5.52	12	-1.35	0.088	1310	0.978	0.912	15920	0.987
KCTD18	-5.52	12	-1.35	0.0882	1311	0.978	0.912	15919	0.987
C17orf47	-5.04	10	-1.35	0.0883	1312	0.978	0.912	15918	0.987
SPATA8	-5.04	10	-1.35	0.0884	1313	0.978	0.912	15917	0.987
KIAA1109	-5.52	12	-1.35	0.0884	1314	0.978	0.912	15916	0.987
RND2	-5.51	12	-1.35	0.0884	1315	0.978	0.912	15915	0.987
DDX42	-5.51	12	-1.35	0.0884	1316	0.978	0.912	15914	0.987
OLIG2	-5.03	10	-1.35	0.0885	1317	0.978	0.911	15913	0.987
ZNF678	-3.18	4	-1.35	0.0886	1318	0.978	0.911	15912	0.987
ATE1	-5.51	12	-1.35	0.0886	1319	0.978	0.911	15911	0.987
BPHL	-5.51	12	-1.35	0.0887	1320	0.978	0.911	15910	0.987
FAM50B	-5.51	12	-1.35	0.0887	1321	0.978	0.911	15909	0.987
MAVS	-5.51	12	-1.35	0.0887	1322	0.978	0.911	15908	0.987
SLC29A2	-5.51	12	-1.35	0.0888	1323	0.978	0.911	15907	0.987
PAN3	-5.51	12	-1.35	0.0888	1324	0.978	0.911	15906	0.987
SLC11A1	-5.5	12	-1.35	0.0889	1325	0.978	0.911	15905	0.987
HEMK1	-5.5	12	-1.35	0.0891	1326	0.978	0.911	15904	0.987
WDR54	-5.5	12	-1.35	0.0891	1327	0.978	0.911	15903	0.987
INSIG1	-5.5	12	-1.35	0.0892	1328	0.978	0.911	15902	0.987
HNRNPH3	-5.5	12	-1.35	0.0892	1329	0.978	0.911	15901	0.987
LHX2	-5.49	12	-1.34	0.0893	1330	0.978	0.911	15900	0.987
ANKS1A	-5.49	12	-1.34	0.0895	1331	0.978	0.911	15899	0.987
PCYOX1L	-5.49	12	-1.34	0.0895	1332	0.978	0.91	15898	0.987
IFNB1	-3.88	6	-1.34	0.0895	1333	0.978	0.91	15897	0.987
TNFSF14	-5.49	12	-1.34	0.0896	1334	0.978	0.91	15896	0.987
FNDC9	-4.48	8	-1.34	0.0896	1335	0.978	0.91	15895	0.987
FAM162A	-3.17	4	-1.34	0.0897	1336	0.978	0.91	15894	0.987
SHISA7	-5.48	12	-1.34	0.0898	1337	0.978	0.91	15893	0.987
GALNT6	-5.48	12	-1.34	0.0898	1338	0.978	0.91	15892	0.987
ANKMY2	-5.48	12	-1.34	0.0898	1339	0.978	0.91	15891	0.987
SOWAHA	-5	10	-1.34	0.0898	1340	0.978	0.91	15890	0.987
ETS1	-5.48	12	-1.34	0.0901	1341	0.978	0.91	15889	0.987
CLEC10A	-5.47	12	-1.34	0.0901	1342	0.978	0.91	15888	0.987
HRC	-5.47	12	-1.34	0.0902	1343	0.978	0.91	15887	0.987
DNAH11	-5.47	12	-1.34	0.0902	1344	0.978	0.91	15886	0.987
MTDH	-4.47	8	-1.34	0.0903	1345	0.978	0.91	15885	0.987
OSBP2	-5.47	12	-1.34	0.0903	1346	0.978	0.91	15884	0.987
ATP6AP1	-5.47	12	-1.34	0.0904	1347	0.978	0.91	15883	0.987
CLDN2	-5.47	12	-1.34	0.0905	1348	0.978	0.91	15882	0.987
C22orf23	-5.47	12	-1.34	0.0905	1349	0.978	0.909	15881	0.987
CDK16	-5.46	12	-1.34	0.0906	1350	0.978	0.909	15880	0.987
WDR48	-5.46	12	-1.34	0.0906	1351	0.978	0.909	15879	0.987
PAGR1	-5.46	12	-1.34	0.0906	1352	0.978	0.909	15878	0.987
DYNC2H1	-5.46	12	-1.34	0.0907	1353	0.978	0.909	15877	0.987
ITGAE	-5.46	12	-1.34	0.0907	1354	0.978	0.909	15876	0.987
FOXRED2	-5.46	12	-1.34	0.0907	1355	0.978	0.909	15875	0.987
RNPEPL1	-5.46	12	-1.34	0.0908	1356	0.978	0.909	15874	0.987
DYNAP	-3.15	4	-1.34	0.0908	1357	0.978	0.909	15873	0.987
CYP26A1	-5.45	12	-1.33	0.091	1358	0.978	0.909	15872	0.987
NUP43	-5.45	12	-1.33	0.0911	1359	0.978	0.909	15871	0.987
TCP10L	-2.23	2	-1.33	0.0911	1360	0.978	0.909	15870	0.987
SLC26A8	-5.45	12	-1.33	0.0912	1361	0.978	0.909	15869	0.987
LRFN2	-5.45	12	-1.33	0.0913	1362	0.978	0.909	15868	0.987
KCNJ8	-5.45	12	-1.33	0.0913	1363	0.978	0.909	15867	0.987
SNTB1	-5.44	12	-1.33	0.0915	1364	0.978	0.909	15866	0.987
TRPM5	-5.44	12	-1.33	0.0915	1365	0.978	0.909	15865	0.987
OR8S1	-5.44	12	-1.33	0.0916	1366	0.978	0.908	15864	0.987
LCN8	-5.44	12	-1.33	0.0916	1367	0.978	0.908	15863	0.987
KRT1	-5.44	12	-1.33	0.0917	1368	0.978	0.908	15862	0.987
AGPS	-5.44	12	-1.33	0.0917	1369	0.978	0.908	15861	0.987
TP53INP2	-5.44	12	-1.33	0.0917	1370	0.978	0.908	15860	0.987
SF3A2	-5.44	12	-1.33	0.0918	1371	0.978	0.908	15859	0.987
TCTN1	-5.43	12	-1.33	0.0919	1372	0.978	0.908	15858	0.987
IKBIP	-3.14	4	-1.33	0.0919	1373	0.978	0.908	15857	0.987
GADD45A	-5.43	12	-1.33	0.092	1374	0.978	0.908	15856	0.987
WASF1	-5.43	12	-1.33	0.092	1375	0.978	0.908	15855	0.987
CXorf61	-2.22	2	-1.33	0.0921	1376	0.978	0.908	15854	0.987
TUBE1	-3.84	6	-1.33	0.0921	1377	0.978	0.908	15853	0.987
CCDC170	-5.43	12	-1.33	0.0923	1378	0.978	0.908	15852	0.987
VWC2	-5.42	12	-1.33	0.0923	1379	0.978	0.908	15851	0.987
VSTM2A	-5.42	12	-1.33	0.0923	1380	0.978	0.908	15850	0.987
ANKRD16	-5.42	12	-1.33	0.0924	1381	0.978	0.908	15849	0.987
SLAIN2	-5.42	12	-1.33	0.0925	1382	0.978	0.907	15848	0.987
GTF2F1	-5.42	12	-1.33	0.0926	1383	0.978	0.907	15847	0.987
GJB6	-5.42	12	-1.32	0.0926	1384	0.978	0.907	15846	0.987
GP1BB	-4.94	10	-1.32	0.0927	1385	0.978	0.907	15845	0.987
YEATS4	-3.5	5	-1.32	0.0927	1386	0.978	0.907	15844	0.987
MRGPRG	-4.94	10	-1.32	0.0929	1387	0.978	0.907	15843	0.986
GTPBP1	-5.41	12	-1.32	0.0929	1388	0.978	0.907	15842	0.986
NR2F2	-5.41	12	-1.32	0.0931	1389	0.978	0.907	15841	0.986
CLEC4G	-5.4	12	-1.32	0.0932	1390	0.978	0.907	15840	0.986
VIM	-5.4	12	-1.32	0.0932	1391	0.978	0.907	15839	0.986
ABCG5	-5.4	12	-1.32	0.0933	1392	0.978	0.907	15838	0.986
CA13	-5.4	12	-1.32	0.0935	1393	0.978	0.906	15837	0.986
DGUOK	-5.4	12	-1.32	0.0936	1394	0.978	0.906	15836	0.986
CRYAB	-5.39	12	-1.32	0.0937	1395	0.978	0.906	15835	0.986
CCDC85B	-4.92	10	-1.32	0.094	1396	0.978	0.906	15834	0.986
ZNF607	-3.81	6	-1.32	0.0941	1397	0.978	0.906	15833	0.986
THBS3	-5.38	12	-1.32	0.0941	1398	0.978	0.906	15832	0.986
THPO	-5.38	12	-1.32	0.0942	1399	0.978	0.906	15831	0.986
PHF2	-5.38	12	-1.32	0.0942	1400	0.978	0.906	15830	0.986
NPAS4	-5.38	12	-1.31	0.0943	1401	0.978	0.906	15829	0.986
NXT2	-4.91	10	-1.31	0.0943	1402	0.978	0.906	15828	0.986
ZBTB22	-4.91	10	-1.31	0.0943	1403	0.978	0.906	15827	0.986
KCNQ5	-5.38	12	-1.31	0.0944	1404	0.978	0.906	15826	0.986
UQCRH	-2.19	2	-1.31	0.0944	1405	0.978	0.906	15825	0.986
E2F4	-5.37	12	-1.31	0.0945	1406	0.978	0.905	15824	0.986
REPIN1	-5.37	12	-1.31	0.0947	1407	0.978	0.905	15823	0.986
ARF5	-4.38	8	-1.31	0.0947	1408	0.978	0.905	15822	0.986
RRP12	-5.37	12	-1.31	0.0947	1409	0.978	0.905	15821	0.986
ZACN	-5.37	12	-1.31	0.0948	1410	0.978	0.905	15820	0.986
ATP5F1	-3.79	6	-1.31	0.095	1411	0.978	0.905	15819	0.986
FAM46B	-5.36	12	-1.31	0.095	1412	0.978	0.905	15818	0.986
PHACTR2	-5.36	12	-1.31	0.095	1413	0.978	0.905	15817	0.986
ASB12	-4.9	10	-1.31	0.095	1414	0.978	0.905	15816	0.986
AHCYL2	-5.36	12	-1.31	0.0951	1415	0.978	0.905	15815	0.986
ACTRT2	-4.89	10	-1.31	0.0952	1416	0.978	0.905	15814	0.986
LRFN3	-5.35	12	-1.31	0.0954	1417	0.978	0.905	15813	0.986
TANGO6	-5.35	12	-1.31	0.0954	1418	0.978	0.905	15812	0.986
NXF1	-5.35	12	-1.31	0.0955	1419	0.978	0.905	15811	0.986
ZNF454	-5.35	12	-1.31	0.0956	1420	0.978	0.904	15810	0.986
ADCYAP1	-5.34	12	-1.31	0.0958	1421	0.978	0.904	15809	0.985
FBXO10	-5.34	12	-1.31	0.0958	1422	0.978	0.904	15808	0.985
DACH2	-5.34	12	-1.3	0.096	1423	0.978	0.904	15807	0.985
TNS4	-5.34	12	-1.3	0.0961	1424	0.978	0.904	15806	0.985
GINM1	-4.36	8	-1.3	0.0961	1425	0.978	0.904	15805	0.985
SERINC1	-5.34	12	-1.3	0.0961	1426	0.978	0.904	15804	0.985
NKPD1	-5.34	12	-1.3	0.0962	1427	0.978	0.904	15803	0.985
SLCO1A2	-4.36	8	-1.3	0.0963	1428	0.978	0.904	15802	0.985
PRKCD	-5.33	12	-1.3	0.0963	1429	0.978	0.904	15801	0.985
MAPRE1	-2.18	2	-1.3	0.0964	1430	0.978	0.904	15800	0.985
TLR1	-3.77	6	-1.3	0.0964	1431	0.978	0.904	15799	0.985
TUSC1	-4.35	8	-1.3	0.0965	1432	0.978	0.904	15798	0.985
ILDR1	-5.33	12	-1.3	0.0966	1433	0.978	0.903	15797	0.985
SPINK8	-4.86	10	-1.3	0.0967	1434	0.978	0.903	15796	0.985
SPDYE3	-3.07	4	-1.3	0.0967	1435	0.978	0.903	15795	0.985
CAMK2N2	-5.32	12	-1.3	0.097	1436	0.978	0.903	15794	0.985
USP37	-5.09	11	-1.3	0.097	1437	0.978	0.903	15793	0.985
ZHX2	-5.32	12	-1.3	0.0971	1438	0.978	0.903	15792	0.985
MYH4	-5.32	12	-1.3	0.0971	1439	0.978	0.903	15791	0.985
EFCAB11	-3.07	4	-1.3	0.0971	1440	0.978	0.903	15790	0.985
TOLLIP	-5.32	12	-1.3	0.0971	1441	0.978	0.903	15789	0.985
CDK5RAP1	-5.32	12	-1.3	0.0971	1442	0.978	0.903	15788	0.985
KIF16B	-5.31	12	-1.3	0.0973	1443	0.978	0.903	15787	0.985
MYO15A	-5.31	12	-1.3	0.0973	1444	0.978	0.903	15786	0.985
TANK	-5.31	12	-1.3	0.0973	1445	0.978	0.903	15785	0.985
KIAA0556	-5.31	12	-1.3	0.0974	1446	0.978	0.903	15784	0.985
PBLD	-5.31	12	-1.3	0.0974	1447	0.978	0.903	15783	0.985
TTK	-3.07	4	-1.3	0.0974	1448	0.978	0.903	15782	0.985
CHML	-3.07	4	-1.3	0.0974	1449	0.978	0.903	15781	0.985
B3GNT6	-5.31	12	-1.3	0.0974	1450	0.978	0.903	15780	0.985
TMEM190	-5.31	12	-1.3	0.0975	1451	0.978	0.903	15779	0.985
IKBKE	-5.31	12	-1.3	0.0975	1452	0.978	0.902	15778	0.985
EFNB2	-5.31	12	-1.3	0.0976	1453	0.978	0.902	15777	0.985
SLC7A14	-5.3	12	-1.29	0.0978	1454	0.978	0.902	15776	0.985
ITPR1	-5.3	12	-1.29	0.0979	1455	0.978	0.902	15775	0.985
KRT76	-4.33	8	-1.29	0.0979	1456	0.978	0.902	15774	0.985
MKNK2	-5.3	12	-1.29	0.098	1457	0.978	0.902	15773	0.985
PCID2	-5.29	12	-1.29	0.0981	1458	0.978	0.902	15772	0.985
ITM2C	-5.29	12	-1.29	0.0981	1459	0.978	0.902	15771	0.985
PAGE4	-2.16	2	-1.29	0.0981	1460	0.978	0.902	15770	0.985
GCFC2	-5.29	12	-1.29	0.0982	1461	0.978	0.902	15769	0.985
TCHH	-5.29	12	-1.29	0.0982	1462	0.978	0.902	15768	0.985
GUCY2C	-5.29	12	-1.29	0.0982	1463	0.978	0.902	15767	0.985
MED22	-5.29	12	-1.29	0.0983	1464	0.978	0.902	15766	0.985
SLC31A1	-2.16	2	-1.29	0.0984	1465	0.978	0.902	15765	0.985
FAM173B	-5.29	12	-1.29	0.0985	1466	0.978	0.902	15764	0.985
NPPB	-5.28	12	-1.29	0.0985	1467	0.978	0.901	15763	0.985
RHOBTB1	-5.28	12	-1.29	0.0985	1468	0.978	0.901	15762	0.985
LPAR3	-5.28	12	-1.29	0.0986	1469	0.978	0.901	15761	0.985
ADAD2	-5.28	12	-1.29	0.0986	1470	0.978	0.901	15760	0.985
CAND1	-5.28	12	-1.29	0.0987	1471	0.978	0.901	15759	0.985
ZMYND10	-5.28	12	-1.29	0.0987	1472	0.978	0.901	15758	0.985
CNR1	-5.28	12	-1.29	0.0987	1473	0.978	0.901	15757	0.985
CTSO	-3.05	4	-1.29	0.0987	1474	0.978	0.901	15756	0.985
MADCAM1	-4.82	10	-1.29	0.0988	1475	0.978	0.901	15755	0.985
C10orf32	-3.73	6	-1.29	0.0988	1476	0.978	0.901	15754	0.985
RIOK3	-4.57	9	-1.29	0.0989	1477	0.978	0.901	15753	0.985
KLHL31	-5.27	12	-1.29	0.099	1478	0.978	0.901	15752	0.985
SENP3	-5.27	12	-1.29	0.099	1479	0.978	0.901	15751	0.985
GAS2L2	-5.27	12	-1.29	0.0991	1480	0.978	0.901	15750	0.985
IRF8	-5.27	12	-1.29	0.0993	1481	0.978	0.901	15749	0.985
SETD1A	-5.27	12	-1.29	0.0993	1482	0.978	0.901	15748	0.985
CPSF2	-5.27	12	-1.29	0.0993	1483	0.978	0.901	15747	0.985
CLDN14	-5.27	12	-1.29	0.0993	1484	0.978	0.901	15746	0.985
C14orf166B	-5.27	12	-1.29	0.0994	1485	0.978	0.901	15745	0.985
FZR1	-5.26	12	-1.28	0.0995	1486	0.978	0.901	15744	0.985
CNTF	-4.8	10	-1.28	0.0997	1487	0.978	0.9	15743	0.985
LY6G6C	-3.04	4	-1.28	0.0997	1488	0.978	0.9	15742	0.985
ACVR1B	-5.26	12	-1.28	0.0997	1489	0.978	0.9	15741	0.985
SLC25A19	-5.26	12	-1.28	0.0999	1490	0.978	0.9	15740	0.985
RRP15	-4.29	8	-1.28	0.0999	1491	0.978	0.9	15739	0.985
C9orf72	-3.03	4	-1.28	0.0999	1492	0.978	0.9	15738	0.985
APBB1	-5.25	12	-1.28	0.0999	1493	0.978	0.9	15737	0.985
ATRIP	-5.25	12	-1.28	0.1	1494	0.978	0.9	15736	0.985
OR13C3	-3.03	4	-1.28	0.1	1495	0.978	0.9	15735	0.985
C2orf81	-5.25	12	-1.28	0.1	1496	0.978	0.9	15734	0.985
OR7C1	-3.71	6	-1.28	0.1	1497	0.978	0.9	15733	0.985
C11orf53	-4.79	10	-1.28	0.1	1498	0.978	0.9	15732	0.985
C5orf52	-5.25	12	-1.28	0.1	1499	0.978	0.9	15731	0.985
KLK13	-5.25	12	-1.28	0.1	1500	0.978	0.9	15730	0.985
TTC9B	-5.25	12	-1.28	0.1	1501	0.978	0.9	15729	0.985
PNLIPRP1	-5.25	12	-1.28	0.1	1502	0.978	0.9	15728	0.985
IL1R2	-5.25	12	-1.28	0.1	1503	0.978	0.9	15727	0.985
LYZL6	-4.28	8	-1.28	0.101	1504	0.978	0.899	15726	0.985
RSAD2	-5.24	12	-1.28	0.101	1505	0.978	0.899	15725	0.985
CREB3L2	-5.24	12	-1.28	0.101	1506	0.978	0.899	15724	0.985
TACC3	-5.24	12	-1.28	0.101	1507	0.978	0.899	15723	0.985
PRKACG	-4.78	10	-1.28	0.101	1508	0.978	0.899	15722	0.985
GNG13	-4.27	8	-1.28	0.101	1509	0.978	0.899	15721	0.985
GPX8	-4.27	8	-1.28	0.101	1510	0.978	0.899	15720	0.985
PCBP3	-5.23	12	-1.28	0.101	1511	0.978	0.899	15719	0.985
ACTL6A	-5.23	12	-1.28	0.101	1512	0.978	0.899	15718	0.985
HAUS7	-5.23	12	-1.28	0.101	1513	0.978	0.899	15717	0.985
XKRX	-5.23	12	-1.28	0.101	1514	0.978	0.899	15716	0.985
LCMT2	-5.23	12	-1.28	0.101	1515	0.978	0.899	15715	0.985
NLRC4	-5.23	12	-1.28	0.101	1516	0.978	0.899	15714	0.985
CYP4F2	-2.13	2	-1.27	0.101	1517	0.978	0.899	15713	0.985
ANKRD27	-5.23	12	-1.27	0.101	1518	0.978	0.899	15712	0.985
B3GNT3	-5.22	12	-1.27	0.101	1519	0.978	0.899	15711	0.985
RIBC1	-5.22	12	-1.27	0.101	1520	0.978	0.899	15710	0.985
RGS11	-5.22	12	-1.27	0.101	1521	0.978	0.899	15709	0.985
TAL1	-5.22	12	-1.27	0.101	1522	0.978	0.899	15708	0.985
STARD9	-5.22	12	-1.27	0.102	1523	0.978	0.898	15707	0.985
ZFP37	-5.22	12	-1.27	0.102	1524	0.978	0.898	15706	0.985
MICALL2	-5.22	12	-1.27	0.102	1525	0.978	0.898	15705	0.985
TFF1	-5.22	12	-1.27	0.102	1526	0.978	0.898	15704	0.985
UNC93A	-5.22	12	-1.27	0.102	1527	0.978	0.898	15703	0.985
HDAC5	-5.22	12	-1.27	0.102	1528	0.978	0.898	15702	0.985
CDT1	-5.21	12	-1.27	0.102	1529	0.978	0.898	15701	0.985
TMEM56	-3.01	4	-1.27	0.102	1530	0.978	0.898	15700	0.985
GNAS	-5.21	12	-1.27	0.102	1531	0.978	0.898	15699	0.985
RDX	-2.13	2	-1.27	0.102	1532	0.978	0.898	15698	0.985
SLAIN1	-5.2	12	-1.27	0.102	1533	0.978	0.898	15697	0.985
CHRM4	-5.2	12	-1.27	0.102	1534	0.978	0.898	15696	0.985
USP18	-2.12	2	-1.27	0.102	1535	0.978	0.898	15695	0.985
RAB8B	-5.2	12	-1.27	0.102	1536	0.978	0.898	15694	0.985
CWC27	-5.2	12	-1.27	0.102	1537	0.978	0.898	15693	0.985
KIRREL3	-5.2	12	-1.27	0.102	1538	0.978	0.898	15692	0.985
TNFRSF8	-5.2	12	-1.27	0.103	1539	0.978	0.897	15691	0.985
PAXBP1	-4.98	11	-1.27	0.103	1540	0.978	0.897	15690	0.985
PLEKHG5	-5.2	12	-1.27	0.103	1541	0.978	0.897	15689	0.985
GPER	-4.74	10	-1.27	0.103	1542	0.978	0.897	15688	0.985
FAM161B	-5.2	12	-1.27	0.103	1543	0.978	0.897	15687	0.985
PTCHD4	-5.19	12	-1.27	0.103	1544	0.978	0.897	15686	0.985
CMAS	-5.19	12	-1.27	0.103	1545	0.978	0.897	15685	0.985
LCLAT1	-5.19	12	-1.27	0.103	1546	0.978	0.897	15684	0.985
PODXL	-5.19	12	-1.26	0.103	1547	0.978	0.897	15683	0.985
PRDM8	-5.19	12	-1.26	0.103	1548	0.978	0.897	15682	0.985
SNTB2	-5.19	12	-1.26	0.103	1549	0.978	0.897	15681	0.985
ACOX1	-5.18	12	-1.26	0.103	1550	0.978	0.897	15680	0.985
DNASE1L3	-4.73	10	-1.26	0.103	1551	0.978	0.897	15679	0.985
KLK9	-4.73	10	-1.26	0.104	1552	0.978	0.896	15678	0.985
TINAG	-4.23	8	-1.26	0.104	1553	0.978	0.896	15677	0.985
HSD17B3	-5.18	12	-1.26	0.104	1554	0.978	0.896	15676	0.985
CAPN9	-5.18	12	-1.26	0.104	1555	0.978	0.896	15675	0.985
PRDM14	-5.18	12	-1.26	0.104	1556	0.978	0.896	15674	0.985
PALM	-5.18	12	-1.26	0.104	1557	0.978	0.896	15673	0.985
KAZN	-5.17	12	-1.26	0.104	1558	0.978	0.896	15672	0.985
OR4K17	-2.99	4	-1.26	0.104	1559	0.978	0.896	15671	0.985
ABCA12	-5.17	12	-1.26	0.104	1560	0.978	0.896	15670	0.985
ITGB8	-5.17	12	-1.26	0.104	1561	0.978	0.896	15669	0.985
NAGS	-5.17	12	-1.26	0.104	1562	0.978	0.896	15668	0.985
DENND4C	-5.17	12	-1.26	0.104	1563	0.978	0.896	15667	0.985
PKDREJ	-4.72	10	-1.26	0.104	1564	0.978	0.896	15666	0.985
BEND2	-5.17	12	-1.26	0.104	1565	0.978	0.896	15665	0.985
PCDH9	-5.17	12	-1.26	0.104	1566	0.978	0.896	15664	0.985
UBE2QL1	-5.16	12	-1.26	0.104	1567	0.978	0.896	15663	0.985
FAM200A	-2.11	2	-1.26	0.104	1568	0.978	0.896	15662	0.985
ERGIC1	-5.16	12	-1.26	0.104	1569	0.978	0.896	15661	0.985
DDN	-5.16	12	-1.26	0.104	1570	0.978	0.896	15660	0.985
MRGBP	-5.16	12	-1.26	0.104	1571	0.978	0.896	15659	0.985
TSKS	-5.16	12	-1.26	0.104	1572	0.978	0.896	15658	0.985
LRRC3B	-3.65	6	-1.26	0.105	1573	0.978	0.895	15657	0.985
ADORA2B	-5.15	12	-1.26	0.105	1574	0.978	0.895	15656	0.985
AWAT1	-5.15	12	-1.26	0.105	1575	0.978	0.895	15655	0.985
TYW3	-5.15	12	-1.25	0.105	1576	0.978	0.895	15654	0.985
C12orf66	-5.15	12	-1.25	0.105	1577	0.978	0.895	15653	0.985
GSTM4	-2.97	4	-1.25	0.105	1578	0.978	0.895	15652	0.985
MEGF6	-5.15	12	-1.25	0.105	1579	0.978	0.895	15651	0.985
MLPH	-5.14	12	-1.25	0.105	1580	0.978	0.895	15650	0.985
GPR98	-5.14	12	-1.25	0.105	1581	0.978	0.895	15649	0.985
SLC30A7	-5.14	12	-1.25	0.105	1582	0.978	0.895	15648	0.985
STAT5A	-5.14	12	-1.25	0.105	1583	0.978	0.895	15647	0.985
DDIT3	-4.2	8	-1.25	0.105	1584	0.978	0.895	15646	0.985
UNC13C	-5.14	12	-1.25	0.105	1585	0.978	0.895	15645	0.985
WDR76	-5.14	12	-1.25	0.105	1586	0.978	0.895	15644	0.985
PNN	-5.14	12	-1.25	0.105	1587	0.978	0.895	15643	0.985
HSP90AB1	-4.2	8	-1.25	0.105	1588	0.978	0.895	15642	0.985
IP6K1	-5.14	12	-1.25	0.105	1589	0.978	0.895	15641	0.985
TMCC3	-5.14	12	-1.25	0.105	1590	0.978	0.895	15640	0.985
VNN1	-5.14	12	-1.25	0.105	1591	0.978	0.895	15639	0.985
ADH4	-4.69	10	-1.25	0.105	1592	0.978	0.895	15638	0.985
RAPGEF3	-5.14	12	-1.25	0.105	1593	0.978	0.895	15637	0.985
FRMD8	-5.13	12	-1.25	0.106	1594	0.978	0.894	15636	0.985
GSE1	-5.13	12	-1.25	0.106	1595	0.978	0.894	15635	0.985
MCRS1	-5.13	12	-1.25	0.106	1596	0.978	0.894	15634	0.985
IKZF2	-5.13	12	-1.25	0.106	1597	0.978	0.894	15633	0.985
FAM196B	-5.13	12	-1.25	0.106	1598	0.978	0.894	15632	0.985
PRKAG1	-5.13	12	-1.25	0.106	1599	0.978	0.894	15631	0.985
MRFAP1	-4.18	8	-1.25	0.106	1600	0.978	0.894	15630	0.985
C1QTNF4	-3.62	6	-1.25	0.106	1601	0.978	0.894	15629	0.985
C11orf48	-5.12	12	-1.25	0.106	1602	0.978	0.894	15628	0.985
DPEP3	-5.12	12	-1.25	0.106	1603	0.978	0.894	15627	0.985
P2RY1	-5.12	12	-1.25	0.106	1604	0.978	0.894	15626	0.985
NUCB2	-4.67	10	-1.25	0.106	1605	0.978	0.894	15625	0.985
TMEM233	-5.12	12	-1.25	0.106	1606	0.978	0.894	15624	0.985
AKAP12	-4.67	10	-1.25	0.106	1607	0.978	0.894	15623	0.985
CASC5	-5.12	12	-1.25	0.107	1608	0.978	0.893	15622	0.985
KCNC4	-5.12	12	-1.25	0.107	1609	0.978	0.893	15621	0.985
GPR101	-5.11	12	-1.24	0.107	1610	0.978	0.893	15620	0.985
CHRNA9	-5.11	12	-1.24	0.107	1611	0.978	0.893	15619	0.985
CDKAL1	-5.11	12	-1.24	0.107	1612	0.978	0.893	15618	0.985
TMEM200B	-4.17	8	-1.24	0.107	1613	0.978	0.893	15617	0.985
RNF32	-5.11	12	-1.24	0.107	1614	0.978	0.893	15616	0.985
VEZT	-5.11	12	-1.24	0.107	1615	0.978	0.893	15615	0.985
MARCH11	-4.66	10	-1.24	0.107	1616	0.978	0.893	15614	0.985
EXOC8	-5.1	12	-1.24	0.107	1617	0.978	0.893	15613	0.985
CELF3	-5.1	12	-1.24	0.107	1618	0.978	0.893	15612	0.985
DBF4B	-5.1	12	-1.24	0.107	1619	0.978	0.893	15611	0.985
SCNN1B	-5.1	12	-1.24	0.107	1620	0.978	0.893	15610	0.985
ECI1	-5.1	12	-1.24	0.107	1621	0.978	0.893	15609	0.985
AHSA2	-2.94	4	-1.24	0.107	1622	0.978	0.893	15608	0.985
PDF	-5.09	12	-1.24	0.108	1623	0.978	0.892	15607	0.985
POLR1E	-5.09	12	-1.24	0.108	1624	0.978	0.892	15606	0.985
TAF3	-5.09	12	-1.24	0.108	1625	0.978	0.892	15605	0.985
ACTR6	-4.65	10	-1.24	0.108	1626	0.978	0.892	15604	0.985
TPRG1L	-5.09	12	-1.24	0.108	1627	0.978	0.892	15603	0.985
KLRG2	-5.09	12	-1.24	0.108	1628	0.978	0.892	15602	0.985
RPS15A	-1.47	1	-1.24	0.108	1629	0.978	0.892	15601	0.985
EXD2	-5.08	12	-1.24	0.108	1630	0.978	0.892	15600	0.985
PANX1	-5.08	12	-1.23	0.108	1631	0.978	0.892	15599	0.985
JRKL	-4.14	8	-1.23	0.108	1632	0.978	0.892	15598	0.985
KCNA7	-5.07	12	-1.23	0.108	1633	0.978	0.892	15597	0.985
ALKBH6	-5.07	12	-1.23	0.108	1634	0.978	0.892	15596	0.985
POLR2I	-4.86	11	-1.23	0.109	1635	0.978	0.891	15595	0.985
STEAP3	-5.07	12	-1.23	0.109	1636	0.978	0.891	15594	0.985
ZNF260	-2.93	4	-1.23	0.109	1637	0.978	0.891	15593	0.985
NPFFR1	-4.86	11	-1.23	0.109	1638	0.978	0.891	15592	0.985
MLXIP	-5.07	12	-1.23	0.109	1639	0.978	0.891	15591	0.985
IFT140	-5.07	12	-1.23	0.109	1640	0.978	0.891	15590	0.985
MERTK	-5.07	12	-1.23	0.109	1641	0.978	0.891	15589	0.985
NTRK1	-5.07	12	-1.23	0.109	1642	0.978	0.891	15588	0.985
OR51A7	-2.92	4	-1.23	0.109	1643	0.978	0.891	15587	0.985
SAAL1	-4.62	10	-1.23	0.109	1644	0.978	0.891	15586	0.985
FAM92B	-5.06	12	-1.23	0.109	1645	0.978	0.891	15585	0.985
MAGEA11	-3.58	6	-1.23	0.109	1646	0.978	0.891	15584	0.985
ANKRD39	-5.06	12	-1.23	0.109	1647	0.978	0.891	15583	0.985
APBA2	-5.06	12	-1.23	0.109	1648	0.978	0.891	15582	0.985
F2R	-5.06	12	-1.23	0.109	1649	0.978	0.891	15581	0.985
HUS1	-5.05	12	-1.23	0.109	1650	0.978	0.891	15580	0.985
MKL1	-5.05	12	-1.23	0.11	1651	0.978	0.89	15579	0.985
VPS51	-5.05	12	-1.23	0.11	1652	0.978	0.89	15578	0.985
HSPB8	-4.61	10	-1.23	0.11	1653	0.978	0.89	15577	0.984
KDM4E	-4.12	8	-1.23	0.11	1654	0.978	0.89	15576	0.984
C7	-5.05	12	-1.23	0.11	1655	0.978	0.89	15575	0.984
C16orf54	-4.12	8	-1.23	0.11	1656	0.978	0.89	15574	0.984
MYLK2	-5.04	12	-1.23	0.11	1657	0.978	0.89	15573	0.984
MOG	-5.04	12	-1.23	0.11	1658	0.978	0.89	15572	0.984
TECTA	-5.04	12	-1.23	0.11	1659	0.978	0.89	15571	0.984
FA2H	-5.04	12	-1.23	0.11	1660	0.978	0.89	15570	0.984
RFWD2	-2.91	4	-1.23	0.11	1661	0.978	0.89	15569	0.984
PIGL	-5.04	12	-1.22	0.11	1662	0.978	0.89	15568	0.984
CLPX	-5.04	12	-1.22	0.11	1663	0.978	0.89	15567	0.984
KISS1R	-5.04	12	-1.22	0.11	1664	0.978	0.89	15566	0.984
PUM1	-5.03	12	-1.22	0.111	1665	0.978	0.889	15565	0.984
OR14I1	-4.59	10	-1.22	0.111	1666	0.978	0.889	15564	0.984
PFKL	-5.03	12	-1.22	0.111	1667	0.978	0.889	15563	0.984
IFT27	-5.03	12	-1.22	0.111	1668	0.978	0.889	15562	0.984
GBA2	-5.03	12	-1.22	0.111	1669	0.978	0.889	15561	0.984
MTMR7	-5.02	12	-1.22	0.111	1670	0.978	0.889	15560	0.984
SOGA1	-5.02	12	-1.22	0.111	1671	0.978	0.889	15559	0.984
SPIRE1	-5.02	12	-1.22	0.111	1672	0.978	0.889	15558	0.984
CISH	-5.02	12	-1.22	0.111	1673	0.978	0.889	15557	0.984
CENPE	-4.58	10	-1.22	0.111	1674	0.978	0.889	15556	0.984
PRDM6	-5.02	12	-1.22	0.111	1675	0.978	0.889	15555	0.984
MIF	-5.02	12	-1.22	0.111	1676	0.978	0.889	15554	0.984
ZNF605	-3.55	6	-1.22	0.111	1677	0.978	0.889	15553	0.984
FBXL15	-5.02	12	-1.22	0.111	1678	0.978	0.889	15552	0.984
DTNB	-5.01	12	-1.22	0.111	1679	0.978	0.889	15551	0.984
POLR2B	-4.8	11	-1.22	0.111	1680	0.978	0.889	15550	0.984
ZNF8	-5.01	12	-1.22	0.112	1681	0.978	0.888	15549	0.984
IGFBP4	-5.01	12	-1.22	0.112	1682	0.978	0.888	15548	0.984
B3GAT1	-5.01	12	-1.22	0.112	1683	0.978	0.888	15547	0.984
TMOD3	-3.54	6	-1.22	0.112	1684	0.978	0.888	15546	0.984
KLF11	-5	12	-1.22	0.112	1685	0.978	0.888	15545	0.984
IGFLR1	-5	12	-1.22	0.112	1686	0.978	0.888	15544	0.984
SLC44A4	-5	12	-1.22	0.112	1687	0.978	0.888	15543	0.984
LIPA	-5	12	-1.22	0.112	1688	0.978	0.888	15542	0.984
FAM170A	-5	12	-1.21	0.112	1689	0.978	0.888	15541	0.984
RAVER1	-5	12	-1.21	0.112	1690	0.978	0.888	15540	0.984
MAGEF1	-4.08	8	-1.21	0.113	1691	0.978	0.887	15539	0.984
PHC2	-4.99	12	-1.21	0.113	1692	0.978	0.887	15538	0.984
GDF2	-4.99	12	-1.21	0.113	1693	0.978	0.887	15537	0.984
LAMB1	-4.99	12	-1.21	0.113	1694	0.978	0.887	15536	0.984
NCALD	-4.99	12	-1.21	0.113	1695	0.978	0.887	15535	0.984
TOP2B	-4.99	12	-1.21	0.113	1696	0.978	0.887	15534	0.984
SENP1	-4.99	12	-1.21	0.113	1697	0.978	0.887	15533	0.984
SIX1	-4.99	12	-1.21	0.113	1698	0.978	0.887	15532	0.984
SLC9A7	-4.99	12	-1.21	0.113	1699	0.978	0.887	15531	0.984
BARX2	-4.98	12	-1.21	0.113	1700	0.978	0.887	15530	0.984
MAN1C1	-4.98	12	-1.21	0.113	1701	0.978	0.887	15529	0.984
SEPN1	-4.98	12	-1.21	0.113	1702	0.978	0.887	15528	0.984
STIL	-4.98	12	-1.21	0.113	1703	0.978	0.887	15527	0.984
RBFOX3	-4.98	12	-1.21	0.113	1704	0.978	0.887	15526	0.984
CHCHD10	-3.52	6	-1.21	0.113	1705	0.978	0.887	15525	0.984
FYCO1	-4.98	12	-1.21	0.113	1706	0.978	0.887	15524	0.984
TPPP2	-4.98	12	-1.21	0.113	1707	0.978	0.887	15523	0.984
ZMYM1	-4.54	10	-1.21	0.114	1708	0.978	0.886	15522	0.984
PTPRH	-4.97	12	-1.21	0.114	1709	0.978	0.886	15521	0.984
KCNA6	-4.54	10	-1.21	0.114	1710	0.978	0.886	15520	0.984
CCDC168	-4.54	10	-1.21	0.114	1711	0.978	0.886	15519	0.984
WRN	-4.97	12	-1.21	0.114	1712	0.978	0.886	15518	0.984
WDR70	-3.51	6	-1.21	0.114	1713	0.978	0.886	15517	0.984
FMN2	-4.96	12	-1.21	0.114	1714	0.978	0.886	15516	0.984
ERAP2	-4.96	12	-1.21	0.114	1715	0.978	0.886	15515	0.984
TMEM147	-4.96	12	-1.2	0.114	1716	0.978	0.886	15514	0.984
ACSF2	-4.96	12	-1.2	0.114	1717	0.978	0.886	15513	0.984
TBCCD1	-4.53	10	-1.2	0.114	1718	0.978	0.886	15512	0.984
TEX101	-4.96	12	-1.2	0.114	1719	0.978	0.886	15511	0.984
FRRS1L	-4.96	12	-1.2	0.114	1720	0.978	0.886	15510	0.984
SLC11A2	-4.95	12	-1.2	0.114	1721	0.978	0.886	15509	0.984
AAED1	-3.5	6	-1.2	0.115	1722	0.978	0.885	15508	0.984
LIPK	-4.95	12	-1.2	0.115	1723	0.978	0.885	15507	0.984
TDRD6	-4.52	10	-1.2	0.115	1724	0.978	0.885	15506	0.984
PSMD4	-2.86	4	-1.2	0.115	1725	0.978	0.885	15505	0.984
LHFP	-4.52	10	-1.2	0.115	1726	0.978	0.885	15504	0.984
SLC14A1	-4.95	12	-1.2	0.115	1727	0.978	0.885	15503	0.984
KLB	-4.94	12	-1.2	0.115	1728	0.978	0.885	15502	0.984
NKAIN2	-4.04	8	-1.2	0.115	1729	0.978	0.885	15501	0.984
KBTBD11	-4.94	12	-1.2	0.115	1730	0.978	0.885	15500	0.984
CXCR7	-3.49	6	-1.2	0.115	1731	0.978	0.885	15499	0.984
TAB3	-4.94	12	-1.2	0.115	1732	0.978	0.885	15498	0.984
ZNF304	-4.94	12	-1.2	0.115	1733	0.978	0.885	15497	0.984
KHDRBS1	-4.94	12	-1.2	0.115	1734	0.978	0.885	15496	0.984
LSR	-4.94	12	-1.2	0.115	1735	0.978	0.885	15495	0.984
TDRKH	-4.94	12	-1.2	0.115	1736	0.978	0.885	15494	0.984
CBR1	-4.93	12	-1.2	0.115	1737	0.978	0.885	15493	0.984
MAP3K10	-4.93	12	-1.2	0.116	1738	0.978	0.884	15492	0.983
FRMD4B	-4.93	12	-1.2	0.116	1739	0.978	0.884	15491	0.983
GTF2E2	-4.02	8	-1.2	0.116	1740	0.978	0.884	15490	0.983
AP3S2	-4.93	12	-1.2	0.116	1741	0.978	0.884	15489	0.983
SEC22A	-4.5	10	-1.2	0.116	1742	0.978	0.884	15488	0.983
ZNF385B	-4.92	12	-1.19	0.116	1743	0.978	0.884	15487	0.983
NOTO	-4.92	12	-1.19	0.116	1744	0.978	0.884	15486	0.983
ITCH	-4.92	12	-1.19	0.116	1745	0.978	0.884	15485	0.983
MED10	-4.01	8	-1.19	0.117	1746	0.978	0.883	15484	0.983
BTBD1	-4.91	12	-1.19	0.117	1747	0.978	0.883	15483	0.983
IGFALS	-4.48	10	-1.19	0.117	1748	0.978	0.883	15482	0.983
OR5AR1	-4.48	10	-1.19	0.117	1749	0.978	0.883	15481	0.983
HAGHL	-4.91	12	-1.19	0.117	1750	0.978	0.883	15480	0.983
FAM120B	-4.91	12	-1.19	0.117	1751	0.978	0.883	15479	0.983
MIER2	-4.9	12	-1.19	0.117	1752	0.978	0.883	15478	0.983
CKAP2L	-4.9	12	-1.19	0.117	1753	0.978	0.883	15477	0.983
DARS	-4.47	10	-1.19	0.117	1754	0.978	0.883	15476	0.983
TACR2	-4.9	12	-1.19	0.117	1755	0.978	0.883	15475	0.983
CNBP	-4.9	12	-1.19	0.117	1756	0.978	0.883	15474	0.983
CHRDL2	-4.9	12	-1.19	0.117	1757	0.978	0.883	15473	0.983
NTSR2	-4.9	12	-1.19	0.117	1758	0.978	0.883	15472	0.983
AKAP11	-4.47	10	-1.19	0.118	1759	0.978	0.882	15471	0.983
PLSCR2	-2.82	4	-1.19	0.118	1760	0.978	0.882	15470	0.983
OR51E2	-3.99	8	-1.19	0.118	1761	0.978	0.882	15469	0.983
SLC26A11	-4.89	12	-1.19	0.118	1762	0.978	0.882	15468	0.983
MAEL	-4.89	12	-1.19	0.118	1763	0.978	0.882	15467	0.983
TNF	-4.89	12	-1.19	0.118	1764	0.978	0.882	15466	0.983
DAZL	-2.82	4	-1.19	0.118	1765	0.978	0.882	15465	0.983
SLC17A8	-4.89	12	-1.19	0.118	1766	0.978	0.882	15464	0.983
ZAR1	-4.46	10	-1.18	0.118	1767	0.978	0.882	15463	0.983
SHH	-4.88	12	-1.18	0.118	1768	0.978	0.882	15462	0.983
KANSL2	-4.88	12	-1.18	0.118	1769	0.978	0.882	15461	0.983
BAIAP2	-4.88	12	-1.18	0.118	1770	0.978	0.882	15460	0.983
SERPINF1	-4.88	12	-1.18	0.118	1771	0.978	0.882	15459	0.983
TKT	-4.88	12	-1.18	0.118	1772	0.978	0.882	15458	0.983
ZFAT	-4.88	12	-1.18	0.118	1773	0.978	0.882	15457	0.983
FCF1	-2.82	4	-1.18	0.119	1774	0.978	0.881	15456	0.983
BCORL1	-4.87	12	-1.18	0.119	1775	0.978	0.881	15455	0.983
CD109	-4.87	12	-1.18	0.119	1776	0.978	0.881	15454	0.982
EQTN	-2.81	4	-1.18	0.119	1777	0.978	0.881	15453	0.982
SAGE1	-3.98	8	-1.18	0.119	1778	0.978	0.881	15452	0.982
ABCC8	-4.87	12	-1.18	0.119	1779	0.978	0.881	15451	0.982
PMM1	-4.87	12	-1.18	0.119	1780	0.978	0.881	15450	0.982
GPR84	-4.87	12	-1.18	0.119	1781	0.978	0.881	15449	0.982
WRNIP1	-4.86	12	-1.18	0.119	1782	0.978	0.881	15448	0.982
EXD1	-4.86	12	-1.18	0.119	1783	0.978	0.881	15447	0.982
EDARADD	-4.44	10	-1.18	0.119	1784	0.978	0.881	15446	0.982
CLEC11A	-4.86	12	-1.18	0.119	1785	0.978	0.881	15445	0.982
CFTR	-4.86	12	-1.18	0.119	1786	0.978	0.881	15444	0.982
ANKRD10	-4.86	12	-1.18	0.119	1787	0.978	0.881	15443	0.982
AGT	-4.44	10	-1.18	0.119	1788	0.978	0.881	15442	0.982
LACRT	-4.86	12	-1.18	0.119	1789	0.978	0.881	15441	0.982
WBSCR28	-3.44	6	-1.18	0.119	1790	0.978	0.881	15440	0.982
TRIM5	-3.96	8	-1.18	0.12	1791	0.978	0.88	15439	0.982
NKX3-1	-4.85	12	-1.18	0.12	1792	0.978	0.88	15438	0.982
ACAD8	-4.85	12	-1.18	0.12	1793	0.978	0.88	15437	0.982
PSD	-4.85	12	-1.18	0.12	1794	0.978	0.88	15436	0.982
VWA5A	-4.85	12	-1.18	0.12	1795	0.978	0.88	15435	0.982
MAGEB10	-4.43	10	-1.18	0.12	1796	0.978	0.88	15434	0.982
SEMA4A	-4.85	12	-1.18	0.12	1797	0.978	0.88	15433	0.982
GVQW1	-2.8	4	-1.17	0.12	1798	0.978	0.88	15432	0.982
NDUFB2	-4.42	10	-1.17	0.12	1799	0.978	0.88	15431	0.982
ZDHHC16	-4.85	12	-1.17	0.12	1800	0.978	0.88	15430	0.982
NDST1	-4.85	12	-1.17	0.12	1801	0.978	0.88	15429	0.982
PDLIM5	-4.85	12	-1.17	0.12	1802	0.978	0.88	15428	0.982
FASTKD2	-3.43	6	-1.17	0.12	1803	0.978	0.88	15427	0.982
HLTF	-3.43	6	-1.17	0.12	1804	0.978	0.88	15426	0.982
SPAG5	-4.84	12	-1.17	0.12	1805	0.978	0.88	15425	0.982
HIF1AN	-4.84	12	-1.17	0.12	1806	0.978	0.88	15424	0.982
MAST1	-4.84	12	-1.17	0.12	1807	0.978	0.88	15423	0.982
PKD1	-4.84	12	-1.17	0.12	1808	0.978	0.88	15422	0.982
ZBTB7A	-4.84	12	-1.17	0.12	1809	0.978	0.88	15421	0.982
TNS3	-4.84	12	-1.17	0.121	1810	0.978	0.879	15420	0.982
LGI3	-4.84	12	-1.17	0.121	1811	0.978	0.879	15419	0.982
RARRES2	-4.41	10	-1.17	0.121	1812	0.978	0.879	15418	0.982
GFOD2	-4.83	12	-1.17	0.121	1813	0.978	0.879	15417	0.982
UTF1	-4.83	12	-1.17	0.121	1814	0.978	0.879	15416	0.982
MASP2	-4.83	12	-1.17	0.121	1815	0.978	0.879	15415	0.982
CDKN1C	-4.83	12	-1.17	0.121	1816	0.978	0.879	15414	0.982
FAM228B	-3.41	6	-1.17	0.121	1817	0.978	0.879	15413	0.982
SFRP1	-4.82	12	-1.17	0.121	1818	0.978	0.879	15412	0.982
GPR119	-4.4	10	-1.17	0.121	1819	0.978	0.879	15411	0.982
PIAS2	-4.82	12	-1.17	0.121	1820	0.978	0.879	15410	0.982
TMEM238	-4.4	10	-1.17	0.122	1821	0.978	0.878	15409	0.982
ARSE	-4.82	12	-1.17	0.122	1822	0.978	0.878	15408	0.982
ZNF232	-4.4	10	-1.17	0.122	1823	0.978	0.878	15407	0.982
FLT4	-4.82	12	-1.17	0.122	1824	0.978	0.878	15406	0.982
ZNF484	-1.97	2	-1.17	0.122	1825	0.978	0.878	15405	0.982
PIGZ	-4.81	12	-1.17	0.122	1826	0.978	0.878	15404	0.982
FAM47A	-3.93	8	-1.17	0.122	1827	0.978	0.878	15403	0.982
ZNF766	-1.96	2	-1.17	0.122	1828	0.978	0.878	15402	0.982
SLC38A6	-2.78	4	-1.17	0.122	1829	0.978	0.878	15401	0.982
OGFRL1	-4.81	12	-1.16	0.122	1830	0.978	0.878	15400	0.982
RIMS3	-4.81	12	-1.16	0.122	1831	0.978	0.878	15399	0.982
JOSD1	-4.39	10	-1.16	0.122	1832	0.978	0.878	15398	0.982
SSRP1	-4.6	11	-1.16	0.122	1833	0.978	0.878	15397	0.982
TAF1	-4.8	12	-1.16	0.122	1834	0.978	0.878	15396	0.982
PTX4	-4.8	12	-1.16	0.123	1835	0.978	0.877	15395	0.982
ARIH2	-3.92	8	-1.16	0.123	1836	0.978	0.877	15394	0.982
SNX13	-3.92	8	-1.16	0.123	1837	0.978	0.877	15393	0.982
FASTK	-4.8	12	-1.16	0.123	1838	0.978	0.877	15392	0.982
LIN7C	-4.38	10	-1.16	0.123	1839	0.978	0.877	15391	0.982
NRAS	-2.77	4	-1.16	0.123	1840	0.978	0.877	15390	0.982
CCNA2	-4.8	12	-1.16	0.123	1841	0.978	0.877	15389	0.982
HPCAL4	-4.38	10	-1.16	0.123	1842	0.978	0.877	15388	0.982
ATP8A2	-4.8	12	-1.16	0.123	1843	0.978	0.877	15387	0.982
ZBTB12	-3.39	6	-1.16	0.123	1844	0.978	0.877	15386	0.982
HSD17B14	-4.79	12	-1.16	0.123	1845	0.978	0.877	15385	0.982
GINS3	-4.59	11	-1.16	0.123	1846	0.978	0.877	15384	0.982
RPS2	-1.96	2	-1.16	0.123	1847	0.978	0.877	15383	0.982
C5orf51	-4.37	10	-1.16	0.123	1848	0.978	0.877	15382	0.982
TIMM8B	-3.39	6	-1.16	0.123	1849	0.978	0.877	15381	0.982
TNFSF13B	-4.37	10	-1.16	0.123	1850	0.978	0.877	15380	0.982
TEAD4	-4.78	12	-1.16	0.123	1851	0.978	0.877	15379	0.982
ARRDC2	-4.78	12	-1.16	0.124	1852	0.978	0.876	15378	0.982
MNX1	-4.78	12	-1.16	0.124	1853	0.978	0.876	15377	0.982
F2RL1	-3.38	6	-1.16	0.124	1854	0.978	0.876	15376	0.982
FOXP4	-4.78	12	-1.16	0.124	1855	0.978	0.876	15375	0.982
C7orf63	-4.77	12	-1.16	0.124	1856	0.978	0.876	15374	0.982
ATP8B1	-4.77	12	-1.16	0.124	1857	0.978	0.876	15373	0.982
TCEANC2	-4.77	12	-1.16	0.124	1858	0.978	0.876	15372	0.982
CHST7	-4.77	12	-1.15	0.124	1859	0.978	0.876	15371	0.982
JMY	-4.77	12	-1.15	0.124	1860	0.978	0.876	15370	0.982
TOM1	-4.77	12	-1.15	0.124	1861	0.978	0.876	15369	0.982
FSHB	-2.75	4	-1.15	0.125	1862	0.978	0.875	15368	0.981
DYM	-4.76	12	-1.15	0.125	1863	0.978	0.875	15367	0.981
ZSWIM3	-4.76	12	-1.15	0.125	1864	0.978	0.875	15366	0.981
RBMX2	-2.75	4	-1.15	0.125	1865	0.978	0.875	15365	0.981
NAIF1	-4.75	12	-1.15	0.125	1866	0.978	0.875	15364	0.981
KRT74	-4.75	12	-1.15	0.125	1867	0.978	0.875	15363	0.981
SYNGAP1	-4.75	12	-1.15	0.125	1868	0.978	0.875	15362	0.981
ARV1	-4.75	12	-1.15	0.125	1869	0.978	0.875	15361	0.981
DUSP10	-4.75	12	-1.15	0.125	1870	0.978	0.875	15360	0.981
PTGES2	-4.75	12	-1.15	0.125	1871	0.978	0.875	15359	0.981
MMP28	-4.75	12	-1.15	0.125	1872	0.978	0.875	15358	0.981
WNT6	-4.74	12	-1.15	0.126	1873	0.978	0.874	15357	0.981
COX4I2	-4.74	12	-1.15	0.126	1874	0.978	0.874	15356	0.981
EFHC2	-4.74	12	-1.15	0.126	1875	0.978	0.874	15355	0.981
HIST1H4L	-1.94	2	-1.15	0.126	1876	0.978	0.874	15354	0.981
VOPP1	-2.73	4	-1.15	0.126	1877	0.978	0.874	15353	0.981
BRF2	-4.53	11	-1.15	0.126	1878	0.978	0.874	15352	0.981
CDCA2	-4.74	12	-1.15	0.126	1879	0.978	0.874	15351	0.981
TENM3	-4.74	12	-1.15	0.126	1880	0.978	0.874	15350	0.981
RABL5	-4.73	12	-1.15	0.126	1881	0.978	0.874	15349	0.981
CDK6	-4.73	12	-1.15	0.126	1882	0.978	0.874	15348	0.981
KCNK1	-4.73	12	-1.14	0.126	1883	0.978	0.874	15347	0.981
RCAN1	-4.73	12	-1.14	0.126	1884	0.978	0.874	15346	0.981
TCAIM	-4.73	12	-1.14	0.126	1885	0.978	0.874	15345	0.981
TSSC1	-4.73	12	-1.14	0.126	1886	0.978	0.874	15344	0.981
KRT25	-4.31	10	-1.14	0.127	1887	0.978	0.873	15343	0.981
SPEF1	-4.72	12	-1.14	0.127	1888	0.978	0.873	15342	0.981
HRH3	-4.72	12	-1.14	0.127	1889	0.978	0.873	15341	0.981
SUV420H1	-4.72	12	-1.14	0.127	1890	0.978	0.873	15340	0.981
SYCN	-4.72	12	-1.14	0.127	1891	0.978	0.873	15339	0.981
RXFP4	-4.72	12	-1.14	0.127	1892	0.978	0.873	15338	0.981
GPATCH4	-4.72	12	-1.14	0.127	1893	0.978	0.873	15337	0.981
C9orf47	-4.72	12	-1.14	0.127	1894	0.978	0.873	15336	0.981
CYP2A13	-1.93	2	-1.14	0.127	1895	0.978	0.873	15335	0.981
ADCY7	-4.72	12	-1.14	0.127	1896	0.978	0.873	15334	0.981
INPP5E	-4.72	12	-1.14	0.127	1897	0.978	0.873	15333	0.981
TNRC18	-4.71	12	-1.14	0.127	1898	0.978	0.873	15332	0.981
LYPD3	-4.71	12	-1.14	0.127	1899	0.978	0.873	15331	0.981
HPCAL1	-3.85	8	-1.14	0.127	1900	0.978	0.873	15330	0.981
CLDN11	-4.71	12	-1.14	0.127	1901	0.978	0.873	15329	0.981
NLRP5	-4.71	12	-1.14	0.127	1902	0.978	0.873	15328	0.981
ZNF598	-4.71	12	-1.14	0.128	1903	0.978	0.872	15327	0.981
MDC1	-4.71	12	-1.14	0.128	1904	0.978	0.872	15326	0.981
VNN3	-4.7	12	-1.14	0.128	1905	0.978	0.872	15325	0.981
CES5A	-4.7	12	-1.14	0.128	1906	0.978	0.872	15324	0.981
C8orf31	-4.7	12	-1.14	0.128	1907	0.978	0.872	15323	0.981
TBC1D22A	-4.7	12	-1.14	0.128	1908	0.978	0.872	15322	0.981
GATAD1	-3.32	6	-1.14	0.128	1909	0.978	0.872	15321	0.981
PARVG	-4.7	12	-1.14	0.128	1910	0.978	0.872	15320	0.981
CAMP	-4.29	10	-1.14	0.128	1911	0.978	0.872	15319	0.981
DEFB118	-2.71	4	-1.13	0.128	1912	0.978	0.872	15318	0.981
HCRTR2	-4.69	12	-1.13	0.128	1913	0.978	0.872	15317	0.981
FUT5	-2.71	4	-1.13	0.128	1914	0.978	0.872	15316	0.981
NYX	-4.28	10	-1.13	0.128	1915	0.978	0.872	15315	0.981
GUCY1B3	-4.69	12	-1.13	0.128	1916	0.978	0.872	15314	0.981
SYNE2	-4.69	12	-1.13	0.128	1917	0.978	0.872	15313	0.981
TRMT10C	-2.71	4	-1.13	0.129	1918	0.978	0.871	15312	0.981
SMPD3	-4.69	12	-1.13	0.129	1919	0.978	0.871	15311	0.981
GIF	-4.69	12	-1.13	0.129	1920	0.978	0.871	15310	0.981
ASB16	-4.69	12	-1.13	0.129	1921	0.978	0.871	15309	0.981
DCD	-4.28	10	-1.13	0.129	1922	0.978	0.871	15308	0.981
DSCR3	-4.68	12	-1.13	0.129	1923	0.978	0.871	15307	0.98
GOLGA1	-4.68	12	-1.13	0.129	1924	0.978	0.871	15306	0.98
RNF186	-4.27	10	-1.13	0.129	1925	0.978	0.871	15305	0.98
GLTPD1	-4.68	12	-1.13	0.129	1926	0.978	0.871	15304	0.98
C6orf70	-4.68	12	-1.13	0.129	1927	0.978	0.871	15303	0.98
QSER1	-4.27	10	-1.13	0.129	1928	0.978	0.871	15302	0.98
ATXN1	-4.68	12	-1.13	0.129	1929	0.978	0.871	15301	0.98
NOX5	-4.68	12	-1.13	0.129	1930	0.978	0.871	15300	0.98
C11orf21	-4.68	12	-1.13	0.129	1931	0.978	0.871	15299	0.98
ACTL6B	-4.68	12	-1.13	0.129	1932	0.978	0.871	15298	0.98
CHST6	-4.67	12	-1.13	0.129	1933	0.978	0.871	15297	0.98
PEAR1	-4.67	12	-1.13	0.129	1934	0.978	0.871	15296	0.98
HECA	-4.67	12	-1.13	0.129	1935	0.978	0.871	15295	0.98
LMOD1	-4.67	12	-1.13	0.129	1936	0.978	0.871	15294	0.98
C17orf80	-3.82	8	-1.13	0.129	1937	0.978	0.871	15293	0.98
LRRIQ3	-2.7	4	-1.13	0.13	1938	0.978	0.87	15292	0.98
TRIM72	-4.67	12	-1.13	0.13	1939	0.978	0.87	15291	0.98
CAMKK1	-4.67	12	-1.13	0.13	1940	0.978	0.87	15290	0.98
DPM2	-3.81	8	-1.13	0.13	1941	0.978	0.87	15289	0.98
CA8	-4.26	10	-1.13	0.13	1942	0.978	0.87	15288	0.98
RING1	-4.66	12	-1.13	0.13	1943	0.978	0.87	15287	0.98
SLC22A18	-4.66	12	-1.13	0.13	1944	0.978	0.87	15286	0.98
HES6	-4.66	12	-1.13	0.13	1945	0.978	0.87	15285	0.98
ADRA1D	-4.66	12	-1.13	0.13	1946	0.978	0.87	15284	0.98
TBC1D10B	-4.26	10	-1.13	0.13	1947	0.978	0.87	15283	0.98
ZNF559	-2.69	4	-1.13	0.13	1948	0.978	0.87	15282	0.98
CALML5	-4.25	10	-1.12	0.13	1949	0.978	0.87	15281	0.98
TREX1	-4.25	10	-1.12	0.13	1950	0.978	0.87	15280	0.98
C1orf162	-4.25	10	-1.12	0.131	1951	0.978	0.869	15279	0.98
NR2C1	-4.65	12	-1.12	0.131	1952	0.978	0.869	15278	0.98
ZW10	-4.65	12	-1.12	0.131	1953	0.978	0.869	15277	0.98
OR2B6	-1.9	2	-1.12	0.131	1954	0.978	0.869	15276	0.98
KRT32	-4.65	12	-1.12	0.131	1955	0.978	0.869	15275	0.98
MAK16	-4.25	10	-1.12	0.131	1956	0.978	0.869	15274	0.98
PRPF4B	-4.45	11	-1.12	0.131	1957	0.978	0.869	15273	0.98
OR10K1	-4.24	10	-1.12	0.131	1958	0.978	0.869	15272	0.98
PRKAR2B	-4.64	12	-1.12	0.131	1959	0.978	0.869	15271	0.98
TRIM11	-4.64	12	-1.12	0.131	1960	0.978	0.869	15270	0.98
ZNF35	-4.23	10	-1.12	0.131	1961	0.978	0.869	15269	0.98
GSS	-4.64	12	-1.12	0.131	1962	0.978	0.869	15268	0.98
HOXD8	-4.63	12	-1.12	0.132	1963	0.978	0.868	15267	0.98
ELL3	-4.63	12	-1.12	0.132	1964	0.978	0.868	15266	0.98
APOL2	-4.63	12	-1.12	0.132	1965	0.978	0.868	15265	0.98
CSTF2	-4.63	12	-1.12	0.132	1966	0.978	0.868	15264	0.98
ASIC3	-4.63	12	-1.12	0.132	1967	0.978	0.868	15263	0.98
OR1M1	-3.78	8	-1.12	0.132	1968	0.978	0.868	15262	0.98
METTL6	-3.27	6	-1.12	0.132	1969	0.978	0.868	15261	0.98
GPR173	-4.22	10	-1.12	0.132	1970	0.978	0.868	15260	0.98
ZNF662	-3.27	6	-1.12	0.132	1971	0.978	0.868	15259	0.98
CYP2B6	-3.27	6	-1.12	0.132	1972	0.978	0.868	15258	0.98
ATP5D	-4.62	12	-1.12	0.132	1973	0.978	0.868	15257	0.98
DIS3L2	-4.62	12	-1.12	0.132	1974	0.978	0.868	15256	0.98
EPHA8	-4.62	12	-1.12	0.132	1975	0.978	0.868	15255	0.98
L2HGDH	-4.62	12	-1.12	0.132	1976	0.978	0.868	15254	0.98
RARS	-4.22	10	-1.12	0.132	1977	0.978	0.868	15253	0.98
MSH2	-4.62	12	-1.12	0.132	1978	0.978	0.868	15252	0.98
CCDC42B	-4.62	12	-1.12	0.132	1979	0.978	0.868	15251	0.98
GPR56	-4.62	12	-1.12	0.132	1980	0.978	0.868	15250	0.98
ANKRD33	-4.62	12	-1.11	0.132	1981	0.978	0.868	15249	0.98
SLC4A10	-4.62	12	-1.11	0.132	1982	0.978	0.868	15248	0.98
DNAJB12	-4.62	12	-1.11	0.133	1983	0.978	0.867	15247	0.98
PI4K2A	-4.61	12	-1.11	0.133	1984	0.978	0.867	15246	0.98
ARFIP2	-4.61	12	-1.11	0.133	1985	0.978	0.867	15245	0.98
DEFB134	-1.88	2	-1.11	0.133	1986	0.978	0.867	15244	0.98
KMO	-4.21	10	-1.11	0.133	1987	0.978	0.867	15243	0.98
C1orf74	-4.21	10	-1.11	0.133	1988	0.978	0.867	15242	0.98
SERPINA9	-4.61	12	-1.11	0.133	1989	0.978	0.867	15241	0.98
ZFP91	-4.61	12	-1.11	0.133	1990	0.978	0.867	15240	0.98
OR13A1	-4.61	12	-1.11	0.133	1991	0.978	0.867	15239	0.98
CHPF	-4.6	12	-1.11	0.134	1992	0.978	0.866	15238	0.98
C1D	-1.88	2	-1.11	0.134	1993	0.978	0.866	15237	0.98
MTCH1	-4.6	12	-1.11	0.134	1994	0.978	0.866	15236	0.98
NIPSNAP3B	-2.65	4	-1.11	0.134	1995	0.978	0.866	15235	0.98
SLC39A8	-3.25	6	-1.11	0.134	1996	0.978	0.866	15234	0.98
UFL1	-4.2	10	-1.11	0.134	1997	0.978	0.866	15233	0.98
EVA1C	-4.59	12	-1.11	0.134	1998	0.978	0.866	15232	0.98
HYOU1	-4.59	12	-1.11	0.134	1999	0.978	0.866	15231	0.98
[truncated: 15,230 more rows]

## Sheet: DrugZ T15 R1
GENE	sumZ	numObs	normZ	pval_synth	rank_synth	fdr_synth	pval_supp	rank_supp	fdr_supp
ERCC8	-30.73	6	-11.97	2.6e-33	1	4.47e-29	1	17223	1
ADH5	-11.77	2	-7.9	1.44e-15	2	1.24e-11	1	17222	1
ERCC6	-15.36	6	-5.92	1.66e-09	3	9.52e-06	1	17221	1
ESD	-11.25	4	-5.29	6.03e-08	4	0.000259	1	17220	1
BBX	-11.64	6	-4.45	4.32e-06	5	0.0149	1	17219	1
TADA2B	-11.21	6	-4.28	9.26e-06	6	0.0266	1	17218	1
MCM8	-11.08	6	-4.23	1.17e-05	7	0.0288	1	17217	1
C19orf40	-10.31	6	-3.93	4.3e-05	8	0.0926	1	17216	1
CERS6	-10.11	6	-3.85	6e-05	9	0.107	1	17215	1
DYRK1A	-10.09	6	-3.84	6.2e-05	10	0.107	1	17214	1
TAF6L	-9.93	6	-3.77	8e-05	11	0.119	1	17213	1
FANCA	-9.91	6	-3.77	8.28e-05	12	0.119	1	17212	1
PLD4	-9.72	6	-3.69	0.00011	13	0.136	1	17211	1
CDON	-9.72	6	-3.69	0.00011	14	0.136	1	17210	1
TOR4A	-8.59	5	-3.57	0.000177	15	0.182	1	17209	1
ERCC5	-9.38	6	-3.56	0.000185	16	0.182	1	17208	1
FANCF	-8.5	5	-3.53	0.000206	17	0.182	1	17207	1
C14orf178	-3.8	1	-3.53	0.000208	18	0.182	1	17206	1
HNRNPL	-3.79	1	-3.52	0.000212	19	0.182	1	17205	1
OR10P1	-9.29	6	-3.52	0.000213	20	0.182	1	17204	1
LEO1	-9.25	6	-3.51	0.000224	21	0.182	1	17203	1
UBR4	-9.23	6	-3.5	0.000232	22	0.182	1	17202	1
HEXIM1	-7.37	4	-3.42	0.000315	23	0.236	1	17201	1
KIF16B	-8.98	6	-3.4	0.000333	24	0.239	1	17200	1
TRAF3	-8.95	6	-3.39	0.000351	25	0.242	1	17199	1
CRIPAK	-5.12	2	-3.36	0.000397	26	0.263	1	17198	1
HELQ	-8.83	6	-3.34	0.000415	27	0.265	1	17197	1
FAM187A	-7.14	4	-3.31	0.000466	28	0.276	1	17196	1
FANCI	-7.97	5	-3.3	0.000479	29	0.276	1	17195	1
FLNC	-8.73	6	-3.3	0.000481	30	0.276	1	17194	1
HOXA5	-8.66	6	-3.28	0.000524	31	0.281	0.999	17193	1
PANX3	-8.6	6	-3.25	0.000573	32	0.281	0.999	17192	1
TNFRSF19	-8.58	6	-3.25	0.000586	33	0.281	0.999	17191	1
PRKACG	-7.82	5	-3.24	0.000596	34	0.281	0.999	17190	1
TPM2	-8.57	6	-3.24	0.000599	35	0.281	0.999	17189	1
CCS	-8.56	6	-3.24	0.000602	36	0.281	0.999	17188	1
VCL	-8.56	6	-3.24	0.000603	37	0.281	0.999	17187	1
PRR3	-7.7	5	-3.19	0.000723	38	0.328	0.999	17186	1
SLC20A1	-8.4	6	-3.17	0.000758	39	0.335	0.999	17185	1
ASIP	-6.77	4	-3.13	0.000868	40	0.365	0.999	17184	1
ATXN1	-8.29	6	-3.13	0.00087	41	0.365	0.999	17183	1
LEPROT	-4.73	2	-3.09	0.000988	42	0.398	0.999	17182	1
BPIFB6	-8.18	6	-3.09	0.00101	43	0.398	0.999	17181	1
TMOD2	-8.18	6	-3.09	0.00102	44	0.398	0.999	17180	1
C19orf25	-7.43	5	-3.07	0.00106	45	0.406	0.999	17179	1
HPCAL1	-6.63	4	-3.06	0.0011	46	0.41	0.999	17178	1
KLK10	-8.09	6	-3.05	0.00113	47	0.416	0.999	17177	1
DOK5	-8.07	6	-3.04	0.00117	48	0.418	0.999	17176	1
CLEC4G	-8.05	6	-3.04	0.0012	49	0.421	0.999	17175	1
SOGA1	-8.03	6	-3.03	0.00123	50	0.422	0.999	17174	1
BTG2	-8	6	-3.01	0.00129	51	0.426	0.999	17173	1
SOLH	-8	6	-3.01	0.00129	52	0.426	0.999	17172	1
PEBP4	-7.98	6	-3.01	0.00131	53	0.426	0.999	17171	1
RNF170	-7.93	6	-2.99	0.0014	54	0.433	0.999	17170	1
PCGF1	-7.92	6	-2.98	0.00142	55	0.433	0.999	17169	1
RPRD1B	-7.91	6	-2.98	0.00143	56	0.433	0.999	17168	1
ZER1	-7.91	6	-2.98	0.00143	57	0.433	0.999	17167	1
ZNF329	-6.43	4	-2.97	0.0015	58	0.439	0.998	17166	1
HSD3B7	-7.88	6	-2.97	0.0015	59	0.439	0.998	17165	1
HSD17B11	-5.56	3	-2.96	0.00154	60	0.441	0.998	17164	1
PPARGC1A	-7.82	6	-2.94	0.00162	61	0.457	0.998	17163	1
TAF5L	-7.79	6	-2.93	0.00167	62	0.457	0.998	17162	1
ERCC3	-7.78	6	-2.93	0.00169	63	0.457	0.998	17161	1
TNKS	-7.78	6	-2.93	0.0017	64	0.457	0.998	17160	1
MTMR6	-7.68	6	-2.89	0.00192	65	0.509	0.998	17159	1
FOXD2	-7.65	6	-2.88	0.00201	66	0.513	0.998	17158	1
OR1M1	-6.24	4	-2.87	0.00203	67	0.513	0.998	17157	1
HCRTR2	-7.64	6	-2.87	0.00203	68	0.513	0.998	17156	1
FAM174A	-6.22	4	-2.87	0.00207	69	0.513	0.998	17155	1
PLAC9	-4.4	2	-2.87	0.00208	70	0.513	0.998	17154	1
C18orf25	-4.37	2	-2.85	0.00219	71	0.532	0.998	17153	1
ENG	-7.54	6	-2.83	0.0023	72	0.544	0.998	17152	1
SLAIN2	-7.52	6	-2.83	0.00235	73	0.544	0.998	17151	1
HMMR	-6.13	4	-2.82	0.00237	74	0.544	0.998	17150	1
INTS8	-7.51	6	-2.82	0.00237	75	0.544	0.998	17149	1
HOXA1	-7.47	6	-2.81	0.00249	76	0.563	0.998	17148	1
PPP4R4	-7.44	6	-2.8	0.00258	77	0.574	0.997	17147	1
UBE3A	-4.28	2	-2.78	0.00268	78	0.574	0.997	17146	1
POM121L2	-6.75	5	-2.78	0.00273	79	0.574	0.997	17145	1
ODF3L2	-7.39	6	-2.78	0.00275	80	0.574	0.997	17144	1
GBP6	-6.73	5	-2.77	0.0028	81	0.574	0.997	17143	1
TADA3	-7.36	6	-2.76	0.00285	82	0.574	0.997	17142	1
UTS2R	-7.34	6	-2.76	0.00292	83	0.574	0.997	17141	1
HOXB9	-7.34	6	-2.76	0.00293	84	0.574	0.997	17140	1
RAB32	-7.34	6	-2.75	0.00294	85	0.574	0.997	17139	1
DDX20	-7.33	6	-2.75	0.00296	86	0.574	0.997	17138	1
CCDC65	-7.32	6	-2.75	0.00298	87	0.574	0.997	17137	1
CLCF1	-7.32	6	-2.75	0.00299	88	0.574	0.997	17136	1
CBR3	-6.68	5	-2.75	0.003	89	0.574	0.997	17135	1
SP6	-6.68	5	-2.75	0.003	90	0.574	0.997	17134	1
CASP7	-7.29	6	-2.73	0.00313	91	0.592	0.997	17133	1
INHBC	-7.26	6	-2.72	0.00323	92	0.602	0.997	17132	1
CRYAB	-7.25	6	-2.72	0.00325	93	0.602	0.997	17131	1
SENP6	-7.24	6	-2.72	0.00331	94	0.607	0.997	17130	1
FAM189A2	-7.2	6	-2.7	0.00346	95	0.626	0.997	17129	1
SYT4	-5.87	4	-2.7	0.0035	96	0.626	0.996	17128	1
GLB1	-7.17	6	-2.69	0.00359	97	0.626	0.996	17127	1
HES3	-6.54	5	-2.69	0.00361	98	0.626	0.996	17126	1
FAM92B	-7.16	6	-2.68	0.00363	99	0.626	0.996	17125	1
BCL2L1	-7.15	6	-2.68	0.00366	100	0.626	0.996	17124	1
EXO1	-7.15	6	-2.68	0.00367	101	0.626	0.996	17123	1
HERPUD1	-7.14	6	-2.68	0.00371	102	0.626	0.996	17122	1
VEGFC	-7.13	6	-2.67	0.00377	103	0.631	0.996	17121	1
CCDC154	-7.12	6	-2.67	0.00382	104	0.632	0.996	17120	1
FBXL15	-7.11	6	-2.66	0.00386	105	0.632	0.996	17119	1
IMPACT	-4.09	2	-2.66	0.00395	106	0.636	0.996	17118	1
PLSCR2	-4.09	2	-2.65	0.00398	107	0.636	0.996	17117	1
PPM1F	-7.08	6	-2.65	0.00399	108	0.636	0.996	17116	1
TCTEX1D2	-5.77	4	-2.65	0.00404	109	0.639	0.996	17115	1
C20orf112	-7.05	6	-2.64	0.00411	110	0.641	0.996	17114	1
ATG3	-7.05	6	-2.64	0.00413	111	0.641	0.996	17113	1
NLRP10	-7.01	6	-2.62	0.00435	112	0.647	0.996	17112	1
SUMO3	-7.01	6	-2.62	0.00435	113	0.647	0.996	17111	1
TMC8	-7	6	-2.62	0.00436	114	0.647	0.996	17110	1
C6orf201	-6.39	5	-2.62	0.00438	115	0.647	0.996	17109	1
RBP1	-6.39	5	-2.62	0.00438	116	0.647	0.996	17108	1
SLC6A5	-6.98	6	-2.62	0.00445	117	0.647	0.996	17107	1
CHMP4C	-6.37	5	-2.61	0.00447	118	0.647	0.996	17106	1
DUSP7	-6.98	6	-2.61	0.00449	119	0.647	0.996	17105	1
PPP3CA	-6.97	6	-2.61	0.00451	120	0.647	0.995	17104	1
TOPORS	-6.96	6	-2.61	0.00457	121	0.647	0.995	17103	1
ENPEP	-6.96	6	-2.6	0.0046	122	0.647	0.995	17102	1
SHROOM1	-6.94	6	-2.6	0.00468	123	0.647	0.995	17101	1
SLC5A2	-6.94	6	-2.6	0.0047	124	0.647	0.995	17100	1
UBFD1	-2.83	1	-2.59	0.00477	125	0.647	0.995	17099	1
CCDC173	-6.31	5	-2.59	0.00484	126	0.647	0.995	17098	1
KLHL25	-6.91	6	-2.59	0.00484	127	0.647	0.995	17097	1
RAD21	-3.99	2	-2.58	0.00489	128	0.647	0.995	17096	1
TDRKH	-6.9	6	-2.58	0.0049	129	0.647	0.995	17095	1
C17orf70	-6.89	6	-2.58	0.00498	130	0.647	0.995	17094	1
SNX5	-2.81	1	-2.57	0.00504	131	0.647	0.995	17093	1
ZSCAN18	-6.87	6	-2.57	0.00506	132	0.647	0.995	17092	1
SLC18A1	-6.87	6	-2.57	0.00508	133	0.647	0.995	17091	1
RASSF4	-6.86	6	-2.57	0.00516	134	0.647	0.995	17090	1
TUBA8	-5.59	4	-2.56	0.00523	135	0.647	0.995	17089	1
NTN4	-6.84	6	-2.56	0.00523	136	0.647	0.995	17088	1
HMGCS2	-6.83	6	-2.56	0.00528	137	0.647	0.995	17087	1
SAMD1	-6.83	6	-2.56	0.00529	138	0.647	0.995	17086	1
PANK4	-6.83	6	-2.55	0.00531	139	0.647	0.995	17085	1
CCR2	-3.94	2	-2.55	0.00532	140	0.647	0.995	17084	1
GNLY	-5.57	4	-2.55	0.00538	141	0.647	0.995	17083	1
ARFGAP1	-6.82	6	-2.55	0.00539	142	0.647	0.995	17082	1
LRGUK	-6.81	6	-2.55	0.00542	143	0.647	0.995	17081	1
PRKRA	-5.56	4	-2.55	0.00545	144	0.647	0.995	17080	1
C19orf70	-6.81	6	-2.55	0.00545	145	0.647	0.995	17079	1
ATP1B1	-6.8	6	-2.54	0.00551	146	0.65	0.994	17078	1
GAB4	-6.79	6	-2.54	0.00554	147	0.65	0.994	17077	1
RAB31	-6.19	5	-2.54	0.0056	148	0.652	0.994	17076	1
CCDC64B	-6.76	6	-2.53	0.00572	149	0.661	0.994	17075	1
SLC25A36	-5.52	4	-2.53	0.00578	150	0.664	0.994	17074	1
HIST1H4H	-4.76	3	-2.52	0.0059	151	0.668	0.994	17073	1
LOH12CR1	-6.73	6	-2.51	0.00595	152	0.668	0.994	17072	1
C1orf111	-6.14	5	-2.51	0.00598	153	0.668	0.994	17071	1
UVSSA	-6.72	6	-2.51	0.00599	154	0.668	0.994	17070	1
MAP7D1	-6.72	6	-2.51	0.00604	155	0.668	0.994	17069	1
FANCG	-6.13	5	-2.51	0.00605	156	0.668	0.994	17068	1
ALDH7A1	-6.69	6	-2.5	0.00622	157	0.679	0.994	17067	1
CXorf61	-2.73	1	-2.5	0.00623	158	0.679	0.994	17066	1
SUGP2	-6.68	6	-2.5	0.00628	159	0.68	0.994	17065	1
EED	-6.09	5	-2.49	0.00633	160	0.682	0.994	17064	1
H2BFWT	-5.44	4	-2.49	0.00644	161	0.689	0.994	17063	1
WDR61	-4.7	3	-2.48	0.00649	162	0.69	0.994	17062	1
L3MBTL3	-6.65	6	-2.48	0.00653	163	0.69	0.993	17061	1
CYorf17	-6.64	6	-2.48	0.0066	164	0.692	0.993	17060	1
PGBD3	-6.63	6	-2.48	0.00663	165	0.692	0.993	17059	1
ARF5	-5.4	4	-2.47	0.00678	166	0.697	0.993	17058	1
DAZAP2	-4.67	3	-2.47	0.00681	167	0.697	0.993	17057	1
GMNN	-3.81	2	-2.47	0.00681	168	0.697	0.993	17056	1
ADRA1D	-6.6	6	-2.47	0.00684	169	0.697	0.993	17055	1
FBLN7	-6.59	6	-2.46	0.00693	170	0.701	0.993	17054	1
ZNF345	-3.8	2	-2.45	0.00705	171	0.701	0.993	17053	1
PPY	-4.65	3	-2.45	0.00706	172	0.701	0.993	17052	1
PSENEN	-4.65	3	-2.45	0.00709	173	0.701	0.993	17051	1
WNT2	-6.56	6	-2.45	0.00717	174	0.701	0.993	17050	1
DAZL	-3.79	2	-2.45	0.00719	175	0.701	0.993	17049	1
ERF	-6.55	6	-2.45	0.00724	176	0.701	0.993	17048	1
HAS3	-6.55	6	-2.45	0.00724	177	0.701	0.993	17047	1
CBFB	-6.55	6	-2.44	0.00727	178	0.701	0.993	17046	1
RAB39B	-6.55	6	-2.44	0.00728	179	0.701	0.993	17045	1
SLC35B2	-6.54	6	-2.44	0.00735	180	0.703	0.993	17044	1
EPHB1	-6.53	6	-2.44	0.00741	181	0.704	0.993	17043	1
ZNF669	-5.96	5	-2.44	0.00744	182	0.704	0.993	17042	1
TRAF2	-6.51	6	-2.43	0.00757	183	0.712	0.992	17041	1
TLR1	-4.6	3	-2.43	0.00765	184	0.716	0.992	17040	1
RGR	-6.49	6	-2.42	0.0077	185	0.716	0.992	17039	1
VWF	-6.49	6	-2.42	0.00773	186	0.716	0.992	17038	1
RNF130	-6.48	6	-2.42	0.00779	187	0.716	0.992	17037	1
GPR84	-6.48	6	-2.42	0.00781	188	0.716	0.992	17036	1
KIAA0922	-6.47	6	-2.41	0.00794	189	0.723	0.992	17035	1
COL21A1	-6.45	6	-2.41	0.00808	190	0.732	0.992	17034	1
TCF7L2	-6.44	6	-2.4	0.00813	191	0.733	0.992	17033	1
RALB	-6.43	6	-2.4	0.00823	192	0.738	0.992	17032	1
CDC42BPA	-6.4	6	-2.39	0.00848	193	0.751	0.992	17031	1
SLC24A1	-6.4	6	-2.39	0.0085	194	0.751	0.992	17030	1
TXNRD3NB	-5.22	4	-2.38	0.0086	195	0.751	0.991	17029	1
NCR3LG1	-6.39	6	-2.38	0.00861	196	0.751	0.991	17028	1
PRDM14	-6.38	6	-2.38	0.00869	197	0.751	0.991	17027	1
AHSG	-6.38	6	-2.38	0.00869	198	0.751	0.991	17026	1
TRHR	-5.81	5	-2.37	0.00882	199	0.751	0.991	17025	1
ERC2	-6.37	6	-2.37	0.00884	200	0.751	0.991	17024	1
FNBP1L	-6.36	6	-2.37	0.00887	201	0.751	0.991	17023	1
EXOC3L1	-6.36	6	-2.37	0.00893	202	0.751	0.991	17022	1
GTPBP1	-6.35	6	-2.37	0.00895	203	0.751	0.991	17021	1
ADAMTS18	-6.35	6	-2.37	0.00896	204	0.751	0.991	17020	1
SOCS4	-5.19	4	-2.37	0.00896	205	0.751	0.991	17019	1
UXS1	-6.35	6	-2.36	0.00902	206	0.751	0.991	17018	1
KCNJ11	-6.35	6	-2.36	0.00903	207	0.751	0.991	17017	1
CD69	-5.16	4	-2.35	0.00931	208	0.77	0.991	17016	1
WDR43	-6.31	6	-2.35	0.00937	209	0.77	0.991	17015	1
TENM4	-6.31	6	-2.35	0.00939	210	0.77	0.991	17014	1
PTER	-6.3	6	-2.35	0.00948	211	0.77	0.991	17013	1
C7orf31	-6.29	6	-2.34	0.00956	212	0.77	0.99	17012	1
POLR2I	-5.74	5	-2.34	0.0096	213	0.77	0.99	17011	1
COX6B2	-5.13	4	-2.34	0.00961	214	0.77	0.99	17010	1
GPR123	-6.28	6	-2.34	0.00964	215	0.77	0.99	17009	1
LTB4R	-6.28	6	-2.34	0.00966	216	0.77	0.99	17008	1
YDJC	-6.28	6	-2.34	0.0097	217	0.77	0.99	17007	1
DCLRE1C	-5.71	5	-2.33	0.00991	218	0.775	0.99	17006	1
ZDHHC7	-6.26	6	-2.33	0.00992	219	0.775	0.99	17005	1
MAS1L	-5.11	4	-2.33	0.00994	220	0.775	0.99	17004	1
FN3K	-6.25	6	-2.33	0.00995	221	0.775	0.99	17003	1
GJB1	-5.1	4	-2.32	0.0101	222	0.782	0.99	17002	1
REV3L	-6.23	6	-2.32	0.0102	223	0.783	0.99	17001	1
C19orf54	-6.23	6	-2.32	0.0102	224	0.783	0.99	17000	1
EPS15L1	-6.22	6	-2.32	0.0103	225	0.788	0.99	16999	1
EP400NL	-4.39	3	-2.31	0.0105	226	0.796	0.99	16998	1
PIBF1	-6.2	6	-2.31	0.0105	227	0.796	0.99	16997	1
TTC24	-6.2	6	-2.31	0.0105	228	0.797	0.989	16996	1
XPC	-6.18	6	-2.3	0.0108	229	0.803	0.989	16995	1
SNX22	-6.18	6	-2.3	0.0108	230	0.803	0.989	16994	1
RETSAT	-6.17	6	-2.29	0.0109	231	0.803	0.989	16993	1
STARD9	-6.16	6	-2.29	0.011	232	0.803	0.989	16992	1
GGN	-6.15	6	-2.29	0.011	233	0.803	0.989	16991	1
DRD4	-6.15	6	-2.29	0.0111	234	0.803	0.989	16990	1
DCBLD1	-6.15	6	-2.29	0.0111	235	0.803	0.989	16989	1
RBM46	-6.15	6	-2.29	0.0112	236	0.803	0.989	16988	1
RBCK1	-6.14	6	-2.28	0.0113	237	0.803	0.989	16987	1
ZNF774	-6.13	6	-2.28	0.0113	238	0.803	0.989	16986	1
DAZAP1	-6.13	6	-2.28	0.0113	239	0.803	0.989	16985	1
TNIP1	-6.12	6	-2.28	0.0114	240	0.803	0.989	16984	1
INTU	-6.12	6	-2.28	0.0114	241	0.803	0.989	16983	1
ZFYVE19	-6.12	6	-2.28	0.0114	242	0.803	0.989	16982	1
CSTL1	-4.98	4	-2.27	0.0117	243	0.803	0.988	16981	1
GTF2A1	-6.1	6	-2.27	0.0117	244	0.803	0.988	16980	1
PAQR6	-6.1	6	-2.27	0.0117	245	0.803	0.988	16979	1
RIOK3	-5.56	5	-2.27	0.0117	246	0.803	0.988	16978	1
TRIM55	-6.09	6	-2.26	0.0118	247	0.803	0.988	16977	1
CCNB3	-6.09	6	-2.26	0.0118	248	0.803	0.988	16976	1
CCDC136	-6.09	6	-2.26	0.0119	249	0.803	0.988	16975	1
NKX2-4	-6.08	6	-2.26	0.0119	250	0.803	0.988	16974	1
USP16	-6.08	6	-2.26	0.0119	251	0.803	0.988	16973	1
PDCD6	-6.08	6	-2.26	0.0119	252	0.803	0.988	16972	1
TRAPPC8	-6.08	6	-2.26	0.0119	253	0.803	0.988	16971	1
OR4C16	-2.48	1	-2.26	0.0119	254	0.803	0.988	16970	1
VWA8	-6.08	6	-2.26	0.012	255	0.803	0.988	16969	1
IGFN1	-6.07	6	-2.26	0.012	256	0.803	0.988	16968	1
PEX3	-3.51	2	-2.26	0.012	257	0.803	0.988	16967	1
TICAM1	-5.54	5	-2.25	0.0121	258	0.803	0.988	16966	1
FAM188B	-6.06	6	-2.25	0.0121	259	0.803	0.988	16965	1
SEC23A	-6.06	6	-2.25	0.0121	260	0.803	0.988	16964	1
PNKP	-6.06	6	-2.25	0.0122	261	0.803	0.988	16963	1
SLX4IP	-6.05	6	-2.25	0.0122	262	0.804	0.988	16962	1
HCFC1R1	-4.94	4	-2.25	0.0123	263	0.804	0.988	16961	1
DNAJB11	-6.03	6	-2.24	0.0125	264	0.81	0.987	16960	1
NSF	-6.03	6	-2.24	0.0125	265	0.81	0.987	16959	1
NFYC	-5.51	5	-2.24	0.0125	266	0.81	0.987	16958	1
PLEKHG4	-6.02	6	-2.24	0.0127	267	0.817	0.987	16957	1
SFMBT1	-6.01	6	-2.23	0.0128	268	0.817	0.987	16956	1
ZHX2	-6.01	6	-2.23	0.0129	269	0.817	0.987	16955	1
ARPP21	-6	6	-2.23	0.0129	270	0.817	0.987	16954	1
FXYD7	-4.24	3	-2.23	0.0129	271	0.817	0.987	16953	1
PDGFA	-6	6	-2.23	0.013	272	0.817	0.987	16952	1
OSBP2	-6	6	-2.23	0.013	273	0.817	0.987	16951	1
SCN5A	-5.99	6	-2.23	0.013	274	0.817	0.987	16950	1
PDE10A	-5.99	6	-2.22	0.013	275	0.817	0.987	16949	1
GZMB	-5.98	6	-2.22	0.0132	276	0.821	0.987	16948	1
KLK1	-5.98	6	-2.22	0.0132	277	0.823	0.987	16947	1
WDR88	-5.96	6	-2.21	0.0134	278	0.823	0.987	16946	1
FZR1	-5.96	6	-2.21	0.0134	279	0.823	0.987	16945	1
RPS10	-4.22	3	-2.21	0.0134	280	0.823	0.987	16944	1
DACH2	-5.96	6	-2.21	0.0135	281	0.823	0.986	16943	1
RIC8A	-5.96	6	-2.21	0.0135	282	0.823	0.986	16942	1
APOH	-5.95	6	-2.21	0.0136	283	0.823	0.986	16941	1
FAM78A	-5.95	6	-2.21	0.0136	284	0.823	0.986	16940	1
SYTL4	-5.95	6	-2.21	0.0136	285	0.824	0.986	16939	1
RRM2B	-5.42	5	-2.2	0.0137	286	0.828	0.986	16938	1
RNF168	-5.93	6	-2.2	0.0138	287	0.828	0.986	16937	1
LRRC39	-2.42	1	-2.2	0.0138	288	0.828	0.986	16936	1
CADM1	-5.92	6	-2.2	0.014	289	0.833	0.986	16935	1
SCIN	-5.92	6	-2.2	0.014	290	0.833	0.986	16934	1
KIAA0825	-5.92	6	-2.2	0.0141	291	0.833	0.986	16933	1
VIM	-5.91	6	-2.19	0.0142	292	0.835	0.986	16932	1
INPP4A	-5.9	6	-2.19	0.0143	293	0.839	0.986	16931	1
FGFBP3	-4.17	3	-2.19	0.0144	294	0.845	0.986	16930	1
PISD	-5.89	6	-2.18	0.0145	295	0.845	0.986	16929	1
S100PBP	-5.88	6	-2.18	0.0146	296	0.847	0.985	16928	1
PYDC2	-2.4	1	-2.18	0.0146	297	0.847	0.985	16927	1
C17orf82	-5.36	5	-2.18	0.0147	298	0.848	0.985	16926	1
FBXO5	-5.36	5	-2.18	0.0148	299	0.852	0.985	16925	1
STAT2	-5.86	6	-2.17	0.0149	300	0.854	0.985	16924	1
DGCR8	-5.85	6	-2.17	0.0151	301	0.854	0.985	16923	1
C17orf53	-5.84	6	-2.17	0.0151	302	0.854	0.985	16922	1
RAB33A	-5.84	6	-2.17	0.0152	303	0.854	0.985	16921	1
WDSUB1	-5.33	5	-2.17	0.0152	304	0.854	0.985	16920	1
LHFPL5	-5.84	6	-2.17	0.0152	305	0.854	0.985	16919	1
ANAPC15	-5.84	6	-2.16	0.0153	306	0.854	0.985	16918	1
GCNT4	-3.37	2	-2.16	0.0153	307	0.854	0.985	16917	1
UCP1	-5.83	6	-2.16	0.0154	308	0.854	0.985	16916	1
C20orf173	-5.83	6	-2.16	0.0154	309	0.854	0.985	16915	1
TPRG1	-5.82	6	-2.16	0.0154	310	0.854	0.985	16914	1
PAX2	-5.82	6	-2.16	0.0155	311	0.854	0.985	16913	1
BRD3	-5.82	6	-2.16	0.0155	312	0.854	0.985	16912	1
TCF7L1	-5.8	6	-2.15	0.0158	313	0.866	0.984	16911	1
MYB	-5.8	6	-2.15	0.0158	314	0.866	0.984	16910	1
LLGL2	-5.79	6	-2.15	0.0159	315	0.866	0.984	16909	1
RHBDD1	-5.79	6	-2.15	0.016	316	0.866	0.984	16908	1
CDHR4	-5.79	6	-2.14	0.016	317	0.866	0.984	16907	1
BEND2	-5.79	6	-2.14	0.016	318	0.866	0.984	16906	1
ANKRD33	-5.78	6	-2.14	0.0161	319	0.871	0.984	16905	1
CLASP1	-5.77	6	-2.14	0.0163	320	0.873	0.984	16904	1
OR2Y1	-4.08	3	-2.14	0.0163	321	0.873	0.984	16903	1
LRRC61	-5.27	5	-2.14	0.0163	322	0.873	0.984	16902	1
LIN28A	-2.35	1	-2.14	0.0164	323	0.873	0.984	16901	1
COPS7B	-5.76	6	-2.13	0.0164	324	0.874	0.984	16900	1
PPARD	-5.76	6	-2.13	0.0165	325	0.874	0.984	16899	1
SUDS3	-2.35	1	-2.13	0.0165	326	0.874	0.983	16898	1
SMIM1	-3.31	2	-2.12	0.0169	327	0.887	0.983	16897	1
ADAMTS15	-5.73	6	-2.12	0.0169	328	0.887	0.983	16896	1
GNMT	-5.73	6	-2.12	0.0169	329	0.887	0.983	16895	1
EDAR	-5.71	6	-2.11	0.0172	330	0.897	0.983	16894	1
BTG3	-5.71	6	-2.11	0.0173	331	0.897	0.983	16893	1
OPTC	-5.71	6	-2.11	0.0173	332	0.897	0.983	16892	1
ZNF554	-5.7	6	-2.11	0.0174	333	0.898	0.983	16891	1
ABCA8	-5.69	6	-2.11	0.0175	334	0.898	0.982	16890	1
CTNNB1	-5.69	6	-2.11	0.0175	335	0.898	0.982	16889	1
TMEM216	-5.2	5	-2.11	0.0175	336	0.898	0.982	16888	1
GCDH	-5.69	6	-2.11	0.0176	337	0.898	0.982	16887	1
LHX8	-5.68	6	-2.1	0.0178	338	0.906	0.982	16886	1
HDAC5	-5.67	6	-2.1	0.018	339	0.906	0.982	16885	1
RNF181	-2.31	1	-2.1	0.018	340	0.906	0.982	16884	1
CHRAC1	-4.63	4	-2.1	0.018	341	0.906	0.982	16883	1
COCH	-5.17	5	-2.1	0.018	342	0.906	0.982	16882	1
LDHD	-5.66	6	-2.09	0.0181	343	0.906	0.982	16881	1
RXFP2	-5.66	6	-2.09	0.0181	344	0.906	0.982	16880	1
CELF2	-5.65	6	-2.09	0.0183	345	0.906	0.982	16879	1
LHFP	-5.16	5	-2.09	0.0183	346	0.906	0.982	16878	1
DLG4	-5.65	6	-2.09	0.0183	347	0.906	0.982	16877	1
C12orf52	-5.65	6	-2.09	0.0184	348	0.906	0.982	16876	1
OPN4	-5.65	6	-2.09	0.0184	349	0.906	0.982	16875	1
CCDC83	-4.6	4	-2.09	0.0185	350	0.906	0.981	16874	1
MTNR1B	-5.64	6	-2.08	0.0185	351	0.906	0.981	16873	1
COX7A2L	-3.25	2	-2.08	0.0186	352	0.906	0.981	16872	1
FANCM	-5.63	6	-2.08	0.0186	353	0.906	0.981	16871	1
MAN1A1	-5.63	6	-2.08	0.0187	354	0.906	0.981	16870	1
DDX25	-5.62	6	-2.08	0.0188	355	0.906	0.981	16869	1
FRYL	-5.62	6	-2.08	0.0188	356	0.906	0.981	16868	1
GRID1	-5.62	6	-2.08	0.0188	357	0.906	0.981	16867	1
SNAP91	-5.62	6	-2.08	0.0189	358	0.908	0.981	16866	1
ATG4B	-5.61	6	-2.07	0.019	359	0.908	0.981	16865	1
PRKAG2	-5.61	6	-2.07	0.019	360	0.908	0.981	16864	1
CHRNA5	-5.12	5	-2.07	0.019	361	0.908	0.981	16863	1
SNRK	-5.6	6	-2.07	0.0191	362	0.91	0.981	16862	1
ABCC3	-5.6	6	-2.07	0.0193	363	0.911	0.981	16861	1
ACCSL	-5.59	6	-2.07	0.0194	364	0.911	0.981	16860	1
FBXL7	-5.59	6	-2.07	0.0194	365	0.911	0.981	16859	1
DIS3L2	-5.59	6	-2.07	0.0194	366	0.911	0.981	16858	1
RMI1	-2.28	1	-2.06	0.0195	367	0.911	0.981	16857	1
PRKAA2	-5.58	6	-2.06	0.0195	368	0.911	0.98	16856	1
BCORL1	-5.58	6	-2.06	0.0196	369	0.911	0.98	16855	1
FLRT1	-5.57	6	-2.06	0.0197	370	0.911	0.98	16854	1
TMEM205	-5.57	6	-2.06	0.0197	371	0.911	0.98	16853	1
ZBTB32	-5.56	6	-2.05	0.02	372	0.911	0.98	16852	1
PCYT1A	-5.56	6	-2.05	0.02	373	0.911	0.98	16851	1
CCDC180	-5.56	6	-2.05	0.02	374	0.911	0.98	16850	1
GTSF1L	-3.21	2	-2.05	0.02	375	0.911	0.98	16849	1
B3GNT4	-5.07	5	-2.05	0.02	376	0.911	0.98	16848	1
PRTG	-5.56	6	-2.05	0.02	377	0.911	0.98	16847	1
ARHGAP31	-5.55	6	-2.05	0.0201	378	0.911	0.98	16846	1
C5orf48	-3.2	2	-2.05	0.0202	379	0.911	0.98	16845	1
PDZD7	-5.54	6	-2.05	0.0203	380	0.911	0.98	16844	1
VAMP5	-4.52	4	-2.05	0.0203	381	0.911	0.98	16843	1
TRIP12	-5.54	6	-2.05	0.0204	382	0.911	0.98	16842	1
LURAP1L	-4.52	4	-2.05	0.0204	383	0.911	0.98	16841	1
BHLHE41	-5.05	5	-2.04	0.0204	384	0.911	0.98	16840	1
EIF1	-3.19	2	-2.04	0.0205	385	0.911	0.98	16839	1
FAM208A	-5.53	6	-2.04	0.0205	386	0.911	0.979	16838	1
TRPC4AP	-5.53	6	-2.04	0.0206	387	0.911	0.979	16837	1
WNT9B	-5.53	6	-2.04	0.0206	388	0.911	0.979	16836	1
APOBEC2	-5.04	5	-2.04	0.0207	389	0.911	0.979	16835	1
ACTL7B	-5.04	5	-2.04	0.0207	390	0.911	0.979	16834	1
LRRC8A	-5.52	6	-2.04	0.0208	391	0.911	0.979	16833	1
CBLB	-5.51	6	-2.04	0.0208	392	0.911	0.979	16832	1
C1D	-2.25	1	-2.03	0.021	393	0.911	0.979	16831	1
H2AFY2	-5.51	6	-2.03	0.021	394	0.911	0.979	16830	1
SLC1A5	-5.51	6	-2.03	0.021	395	0.911	0.979	16829	1
MXRA7	-5.51	6	-2.03	0.021	396	0.911	0.979	16828	1
CHD7	-5.5	6	-2.03	0.021	397	0.911	0.979	16827	1
CAMK2N2	-5.5	6	-2.03	0.0212	398	0.911	0.979	16826	1
POU2AF1	-5.5	6	-2.03	0.0212	399	0.911	0.979	16825	1
RNF149	-5.49	6	-2.03	0.0213	400	0.911	0.979	16824	1
CDHR1	-5.49	6	-2.03	0.0214	401	0.911	0.979	16823	1
FAM49A	-5.48	6	-2.03	0.0214	402	0.911	0.979	16822	1
CRISPLD2	-5.48	6	-2.02	0.0214	403	0.911	0.979	16821	1
UCK2	-5.48	6	-2.02	0.0214	404	0.911	0.979	16820	1
PYDC1	-4.47	4	-2.02	0.0215	405	0.911	0.978	16819	1
C12orf44	-5.48	6	-2.02	0.0215	406	0.911	0.978	16818	1
SNTB1	-5.47	6	-2.02	0.0217	407	0.911	0.978	16817	1
SFXN2	-5.47	6	-2.02	0.0218	408	0.911	0.978	16816	1
PRL	-5.47	6	-2.02	0.0218	409	0.911	0.978	16815	1
FADS1	-5.47	6	-2.02	0.0218	410	0.911	0.978	16814	1
PRDM12	-5.46	6	-2.02	0.022	411	0.911	0.978	16813	1
TM6SF2	-5.45	6	-2.01	0.0221	412	0.911	0.978	16812	1
GMIP	-5.45	6	-2.01	0.0221	413	0.911	0.978	16811	1
LYST	-5.45	6	-2.01	0.0222	414	0.911	0.978	16810	1
OR51B5	-4.44	4	-2.01	0.0225	415	0.911	0.978	16809	1
ELOVL7	-5.43	6	-2.01	0.0225	416	0.911	0.978	16808	1
FIZ1	-5.43	6	-2.01	0.0225	417	0.911	0.978	16807	1
MAML1	-5.43	6	-2	0.0225	418	0.911	0.977	16806	1
TYW3	-5.43	6	-2	0.0226	419	0.911	0.977	16805	1
FBLN1	-5.42	6	-2	0.0227	420	0.911	0.977	16804	1
TMEM233	-5.42	6	-2	0.0227	421	0.911	0.977	16803	1
RAX	-5.42	6	-2	0.0228	422	0.911	0.977	16802	1
AADACL2	-3.83	3	-2	0.0228	423	0.911	0.977	16801	1
TACC1	-5.42	6	-2	0.0229	424	0.911	0.977	16800	1
TOR1A	-4.94	5	-2	0.0229	425	0.911	0.977	16799	1
EIF5B	-5.41	6	-2	0.0229	426	0.911	0.977	16798	1
UBXN10	-5.41	6	-2	0.0229	427	0.911	0.977	16797	1
AHSP	-2.21	1	-2	0.0229	428	0.911	0.977	16796	1
NOD1	-5.41	6	-2	0.023	429	0.911	0.977	16795	1
SPINK8	-4.94	5	-2	0.023	430	0.911	0.977	16794	1
TBX21	-5.41	6	-1.99	0.023	431	0.911	0.977	16793	1
LPHN3	-5.41	6	-1.99	0.0231	432	0.911	0.977	16792	1
HES7	-5.4	6	-1.99	0.0231	433	0.911	0.977	16791	1
NUF2	-3.12	2	-1.99	0.0231	434	0.911	0.977	16790	1
CYP4A22	-2.21	1	-1.99	0.0231	435	0.911	0.977	16789	1
CPS1	-5.4	6	-1.99	0.0232	436	0.911	0.977	16788	1
ARL14EP	-3.81	3	-1.99	0.0233	437	0.911	0.977	16787	1
CPEB2	-5.39	6	-1.99	0.0234	438	0.911	0.977	16786	1
KLK14	-5.39	6	-1.99	0.0234	439	0.911	0.977	16785	1
ZNF672	-5.39	6	-1.99	0.0235	440	0.911	0.977	16784	1
SRCIN1	-5.39	6	-1.99	0.0235	441	0.911	0.977	16783	1
ASB7	-4.91	5	-1.98	0.0237	442	0.911	0.976	16782	1
DTD1	-5.38	6	-1.98	0.0237	443	0.911	0.976	16781	1
NLRP11	-5.38	6	-1.98	0.0237	444	0.911	0.976	16780	1
PLAG1	-4.91	5	-1.98	0.0238	445	0.911	0.976	16779	1
PUM1	-5.37	6	-1.98	0.0239	446	0.911	0.976	16778	1
CEP57	-4.9	5	-1.98	0.0239	447	0.911	0.976	16777	1
GYS2	-5.37	6	-1.98	0.0239	448	0.911	0.976	16776	1
C3orf17	-5.36	6	-1.98	0.024	449	0.911	0.976	16775	1
LPA	-5.36	6	-1.98	0.024	450	0.911	0.976	16774	1
LIPK	-5.36	6	-1.98	0.024	451	0.911	0.976	16773	1
GZMK	-4.38	4	-1.98	0.024	452	0.911	0.976	16772	1
BBS2	-5.36	6	-1.98	0.024	453	0.911	0.976	16771	1
GPM6A	-4.89	5	-1.98	0.0241	454	0.911	0.976	16770	1
IQCH	-5.35	6	-1.97	0.0242	455	0.911	0.976	16769	1
NETO2	-2.18	1	-1.97	0.0243	456	0.911	0.976	16768	1
ANGPTL5	-3.09	2	-1.97	0.0243	457	0.911	0.976	16767	1
EN1	-4.88	5	-1.97	0.0244	458	0.911	0.976	16766	1
SMR3B	-2.18	1	-1.97	0.0244	459	0.911	0.976	16765	1
CRHR2	-5.34	6	-1.97	0.0245	460	0.911	0.976	16764	1
OR52E4	-3.78	3	-1.97	0.0245	461	0.911	0.975	16763	1
SLC7A8	-5.34	6	-1.97	0.0245	462	0.911	0.975	16762	1
HNRNPH3	-5.34	6	-1.97	0.0246	463	0.911	0.975	16761	1
SCN2B	-5.34	6	-1.97	0.0246	464	0.911	0.975	16760	1
SLC10A4	-5.34	6	-1.97	0.0246	465	0.911	0.975	16759	1
GYG1	-3.77	3	-1.97	0.0246	466	0.911	0.975	16758	1
PARP1	-5.33	6	-1.96	0.0248	467	0.914	0.975	16757	1
SCN1B	-5.32	6	-1.96	0.0251	468	0.922	0.975	16756	1
ABLIM1	-5.31	6	-1.96	0.0251	469	0.922	0.975	16755	1
TMEM56	-3.07	2	-1.96	0.0252	470	0.922	0.975	16754	1
PRSS21	-5.31	6	-1.96	0.0253	471	0.922	0.975	16753	1
SLC22A24	-5.31	6	-1.95	0.0253	472	0.922	0.975	16752	1
MYH3	-5.31	6	-1.95	0.0253	473	0.922	0.975	16751	1
GPATCH2	-5.3	6	-1.95	0.0255	474	0.922	0.975	16750	1
ACSBG2	-5.3	6	-1.95	0.0255	475	0.922	0.975	16749	1
IQCE	-5.3	6	-1.95	0.0255	476	0.922	0.974	16748	1
HAPLN4	-5.29	6	-1.95	0.0256	477	0.922	0.974	16747	1
DPP7	-5.29	6	-1.95	0.0257	478	0.922	0.974	16746	1
ZMYND10	-4.83	5	-1.95	0.0258	479	0.922	0.974	16745	1
KCMF1	-5.28	6	-1.94	0.0259	480	0.922	0.974	16744	1
RNASE8	-3.05	2	-1.94	0.026	481	0.922	0.974	16743	1
PWP2	-4.82	5	-1.94	0.026	482	0.922	0.974	16742	1
STIL	-5.27	6	-1.94	0.0261	483	0.922	0.974	16741	1
ARL2	-5.27	6	-1.94	0.0261	484	0.922	0.974	16740	1
CYR61	-5.27	6	-1.94	0.0261	485	0.922	0.974	16739	1
PHF1	-5.27	6	-1.94	0.0262	486	0.922	0.974	16738	1
RSC1A1	-3.72	3	-1.94	0.0263	487	0.922	0.974	16737	1
PLEKHG5	-5.26	6	-1.94	0.0263	488	0.922	0.974	16736	1
IVNS1ABP	-5.26	6	-1.93	0.0265	489	0.922	0.974	16735	1
SGPP2	-5.25	6	-1.93	0.0266	490	0.922	0.973	16734	1
RCAN3	-4.79	5	-1.93	0.0267	491	0.922	0.973	16733	1
MED15	-5.25	6	-1.93	0.0267	492	0.922	0.973	16732	1
ARSG	-5.25	6	-1.93	0.0267	493	0.922	0.973	16731	1
ROM1	-4.79	5	-1.93	0.0267	494	0.922	0.973	16730	1
BCL7A	-4.79	5	-1.93	0.0268	495	0.922	0.973	16729	1
BCOR	-5.24	6	-1.93	0.0268	496	0.922	0.973	16728	1
BEX2	-2.14	1	-1.93	0.0268	497	0.922	0.973	16727	1
SHC4	-5.24	6	-1.93	0.027	498	0.922	0.973	16726	1
ADARB2	-5.24	6	-1.93	0.027	499	0.922	0.973	16725	1
MAST2	-5.23	6	-1.93	0.027	500	0.922	0.973	16724	1
KHDRBS1	-5.23	6	-1.92	0.0272	501	0.922	0.973	16723	1
KIF26B	-5.23	6	-1.92	0.0272	502	0.922	0.973	16722	1
TTC39C	-5.22	6	-1.92	0.0273	503	0.922	0.973	16721	1
SEPT3	-5.22	6	-1.92	0.0274	504	0.922	0.973	16720	1
TOPAZ1	-5.22	6	-1.92	0.0274	505	0.922	0.973	16719	1
C14orf80	-5.21	6	-1.92	0.0276	506	0.922	0.972	16718	1
B3GNT6	-5.21	6	-1.92	0.0276	507	0.922	0.972	16717	1
SGPP1	-5.21	6	-1.92	0.0276	508	0.922	0.972	16716	1
EDC4	-5.21	6	-1.92	0.0276	509	0.922	0.972	16715	1
DGCR2	-5.21	6	-1.92	0.0277	510	0.922	0.972	16714	1
UCHL5	-4.25	4	-1.91	0.0278	511	0.922	0.972	16713	1
THEMIS	-4.75	5	-1.91	0.0279	512	0.922	0.972	16712	1
FAM9B	-3	2	-1.91	0.0279	513	0.922	0.972	16711	1
COX4I1	-5.2	6	-1.91	0.028	514	0.922	0.972	16710	1
CDCP1	-5.2	6	-1.91	0.028	515	0.922	0.972	16709	1
RILP	-5.2	6	-1.91	0.028	516	0.922	0.972	16708	1
HRASLS5	-5.2	6	-1.91	0.028	517	0.922	0.972	16707	1
CCNO	-5.2	6	-1.91	0.028	518	0.922	0.972	16706	1
ZC3H12C	-5.19	6	-1.91	0.028	519	0.922	0.972	16705	1
MTR	-5.19	6	-1.91	0.028	520	0.922	0.972	16704	1
MAEL	-5.19	6	-1.91	0.0281	521	0.922	0.972	16703	1
AIF1L	-5.19	6	-1.91	0.0281	522	0.922	0.972	16702	1
CLEC9A	-5.19	6	-1.91	0.0281	523	0.922	0.972	16701	1
ZNF33A	-3	2	-1.91	0.0281	524	0.922	0.972	16700	1
ECE1	-5.19	6	-1.91	0.0282	525	0.922	0.972	16699	1
CGA	-2.99	2	-1.91	0.0282	526	0.922	0.972	16698	1
KCNC3	-5.19	6	-1.91	0.0282	527	0.922	0.972	16697	1
SLITRK4	-5.18	6	-1.91	0.0283	528	0.922	0.972	16696	1
DHX8	-4.73	5	-1.91	0.0283	529	0.922	0.972	16695	1
PKIG	-5.18	6	-1.91	0.0284	530	0.922	0.972	16694	1
USP40	-5.17	6	-1.9	0.0287	531	0.93	0.971	16693	1
TLX3	-5.17	6	-1.9	0.0287	532	0.93	0.971	16692	1
C6orf25	-5.16	6	-1.9	0.029	533	0.935	0.971	16691	1
N4BP1	-5.15	6	-1.89	0.0291	534	0.936	0.971	16690	1
PPAN	-4.7	5	-1.89	0.0291	535	0.936	0.971	16689	1
HDAC11	-5.15	6	-1.89	0.0292	536	0.94	0.971	16688	1
CNDP2	-5.14	6	-1.89	0.0295	537	0.943	0.971	16687	1
TNNI2	-4.69	5	-1.89	0.0295	538	0.943	0.971	16686	1
PHF8	-5.14	6	-1.89	0.0295	539	0.943	0.97	16685	1
FBXO21	-5.13	6	-1.89	0.0296	540	0.943	0.97	16684	1
CELF4	-5.13	6	-1.88	0.0297	541	0.944	0.97	16683	1
RGL3	-5.13	6	-1.88	0.0298	542	0.944	0.97	16682	1
BRIP1	-4.68	5	-1.88	0.0298	543	0.944	0.97	16681	1
CHD3	-5.12	6	-1.88	0.0299	544	0.944	0.97	16680	1
ITIH1	-5.12	6	-1.88	0.0299	545	0.944	0.97	16679	1
SP110	-5.12	6	-1.88	0.03	546	0.944	0.97	16678	1
ABT1	-5.12	6	-1.88	0.03	547	0.944	0.97	16677	1
TADA2A	-4.67	5	-1.88	0.0301	548	0.945	0.97	16676	1
STX6	-5.11	6	-1.88	0.0301	549	0.945	0.97	16675	1
CYP27C1	-5.11	6	-1.88	0.0302	550	0.946	0.97	16674	1
C11orf35	-5.11	6	-1.88	0.0303	551	0.946	0.97	16673	1
GALR1	-5.11	6	-1.88	0.0303	552	0.946	0.97	16672	1
VCP	-4.17	4	-1.88	0.0304	553	0.946	0.97	16671	1
SUCLG2	-3.61	3	-1.87	0.0305	554	0.947	0.97	16670	1
GPR68	-4.66	5	-1.87	0.0305	555	0.947	0.969	16669	1
COX6A2	-3.6	3	-1.87	0.0306	556	0.949	0.969	16668	1
CITED2	-3.6	3	-1.87	0.0308	557	0.949	0.969	16667	1
KCTD6	-4.64	5	-1.87	0.031	558	0.949	0.969	16666	1
BTRC	-5.08	6	-1.87	0.031	559	0.949	0.969	16665	1
CIDEC	-3.59	3	-1.87	0.0311	560	0.949	0.969	16664	1
RPS6KB1	-4.64	5	-1.87	0.0311	561	0.949	0.969	16663	1
ZNF483	-4.15	4	-1.87	0.0311	562	0.949	0.969	16662	1
MGME1	-3.59	3	-1.86	0.0311	563	0.949	0.969	16661	1
CFH	-5.08	6	-1.86	0.0311	564	0.949	0.969	16660	1
C11orf48	-5.07	6	-1.86	0.0313	565	0.949	0.969	16659	1
RNF175	-5.07	6	-1.86	0.0313	566	0.949	0.969	16658	1
STC2	-5.07	6	-1.86	0.0313	567	0.949	0.969	16657	1
CDK5R2	-5.07	6	-1.86	0.0314	568	0.949	0.969	16656	1
GALNT8	-5.07	6	-1.86	0.0315	569	0.949	0.969	16655	1
UBL4B	-4.14	4	-1.86	0.0315	570	0.949	0.969	16654	1
FBXO17	-5.06	6	-1.86	0.0315	571	0.949	0.969	16653	1
IFT46	-5.06	6	-1.86	0.0316	572	0.95	0.968	16652	1
LYPLA1	-2.07	1	-1.86	0.0316	573	0.95	0.968	16651	1
ATP6V1C2	-5.06	6	-1.86	0.0317	574	0.95	0.968	16650	1
CACNB2	-5.05	6	-1.86	0.0317	575	0.95	0.968	16649	1
PLVAP	-5.05	6	-1.86	0.0318	576	0.95	0.968	16648	1
FAM210A	-4.12	4	-1.85	0.032	577	0.951	0.968	16647	1
MIER2	-5.04	6	-1.85	0.0321	578	0.951	0.968	16646	1
LNX1	-5.04	6	-1.85	0.0321	579	0.951	0.968	16645	1
ANKRD11	-5.04	6	-1.85	0.0321	580	0.951	0.968	16644	1
NBEAL1	-5.04	6	-1.85	0.0321	581	0.951	0.968	16643	1
PAXIP1	-5.04	6	-1.85	0.0322	582	0.951	0.968	16642	1
SPATA8	-4.6	5	-1.85	0.0322	583	0.951	0.968	16641	1
SHPRH	-5.03	6	-1.85	0.0323	584	0.951	0.968	16640	1
NOP10	-3.56	3	-1.85	0.0323	585	0.951	0.968	16639	1
ABCC8	-5.03	6	-1.85	0.0324	586	0.951	0.968	16638	1
FAM212A	-5.03	6	-1.85	0.0324	587	0.951	0.968	16637	1
FAM151B	-5.03	6	-1.85	0.0325	588	0.951	0.967	16636	1
NEK4	-5.03	6	-1.84	0.0326	589	0.951	0.967	16635	1
C6orf211	-4.1	4	-1.84	0.0327	590	0.951	0.967	16634	1
KITLG	-3.55	3	-1.84	0.0328	591	0.951	0.967	16633	1
MAP3K13	-5.01	6	-1.84	0.0329	592	0.951	0.967	16632	1
TCP11	-5.01	6	-1.84	0.033	593	0.951	0.967	16631	1
CPSF2	-5.01	6	-1.84	0.033	594	0.951	0.967	16630	1
SSBP4	-5.01	6	-1.84	0.0331	595	0.951	0.967	16629	1
C11orf1	-3.54	3	-1.84	0.0331	596	0.951	0.967	16628	1
VWDE	-5.01	6	-1.84	0.0331	597	0.951	0.967	16627	1
THRSP	-4.09	4	-1.84	0.0332	598	0.951	0.967	16626	1
RFC5	-5	6	-1.84	0.0332	599	0.951	0.967	16625	1
RSRC1	-4.57	5	-1.83	0.0333	600	0.951	0.967	16624	1
CLPX	-5	6	-1.83	0.0334	601	0.951	0.967	16623	1
ANXA11	-5	6	-1.83	0.0334	602	0.951	0.967	16622	1
STK19	-4.99	6	-1.83	0.0335	603	0.951	0.966	16621	1
ZAR1L	-4.56	5	-1.83	0.0336	604	0.951	0.966	16620	1
LDLRAD2	-4.99	6	-1.83	0.0336	605	0.951	0.966	16619	1
C17orf59	-4.55	5	-1.83	0.0336	606	0.951	0.966	16618	1
DLGAP3	-4.99	6	-1.83	0.0336	607	0.951	0.966	16617	1
RNF148	-4.55	5	-1.83	0.0338	608	0.951	0.966	16616	1
ZRANB1	-4.98	6	-1.83	0.0338	609	0.951	0.966	16615	1
TULP3	-4.98	6	-1.83	0.0339	610	0.951	0.966	16614	1
SLC35A3	-3.52	3	-1.83	0.0339	611	0.951	0.966	16613	1
HAGHL	-4.98	6	-1.83	0.0339	612	0.951	0.966	16612	1
NPPC	-4.55	5	-1.83	0.0339	613	0.951	0.966	16611	1
HIST1H2AK	-2.87	2	-1.83	0.034	614	0.951	0.966	16610	1
MED7	-3.51	3	-1.82	0.0342	615	0.951	0.966	16609	1
RDH8	-4.97	6	-1.82	0.0343	616	0.951	0.966	16608	1
RHAG	-4.97	6	-1.82	0.0343	617	0.951	0.966	16607	1
MDH2	-4.97	6	-1.82	0.0343	618	0.951	0.966	16606	1
DDX46	-4.53	5	-1.82	0.0343	619	0.951	0.966	16605	1
SCAMP5	-4.96	6	-1.82	0.0344	620	0.951	0.966	16604	1
SSMEM1	-4.05	4	-1.82	0.0344	621	0.951	0.966	16603	1
RAD21L1	-2.87	2	-1.82	0.0344	622	0.951	0.966	16602	1
ISOC1	-4.96	6	-1.82	0.0344	623	0.951	0.966	16601	1
MTFP1	-4.96	6	-1.82	0.0344	624	0.951	0.966	16600	1
LRWD1	-4.96	6	-1.82	0.0345	625	0.951	0.965	16599	1
PRPH	-4.95	6	-1.82	0.0347	626	0.952	0.965	16598	1
LIME1	-4.95	6	-1.81	0.0348	627	0.952	0.965	16597	1
YY2	-4.95	6	-1.81	0.0348	628	0.952	0.965	16596	1
VNN1	-4.95	6	-1.81	0.0349	629	0.952	0.965	16595	1
AMPH	-4.95	6	-1.81	0.0349	630	0.952	0.965	16594	1
QSOX1	-4.94	6	-1.81	0.035	631	0.952	0.965	16593	1
TBC1D22A	-4.94	6	-1.81	0.035	632	0.952	0.965	16592	1
RBM12	-4.51	5	-1.81	0.0351	633	0.952	0.965	16591	1
TFPT	-4.94	6	-1.81	0.0351	634	0.952	0.965	16590	1
KRT18	-2.02	1	-1.81	0.0351	635	0.952	0.965	16589	1
ADI1	-4.94	6	-1.81	0.0351	636	0.952	0.965	16588	1
MCM9	-4.93	6	-1.81	0.0353	637	0.953	0.965	16587	1
UBALD2	-2.85	2	-1.81	0.0353	638	0.953	0.965	16586	1
PSORS1C2	-4.5	5	-1.81	0.0354	639	0.953	0.965	16585	1
MOB1A	-2.01	1	-1.8	0.0355	640	0.955	0.964	16584	1
ASCC1	-4.5	5	-1.8	0.0355	641	0.955	0.964	16583	1
TBXA2R	-4.92	6	-1.8	0.0358	642	0.96	0.964	16582	1
RFX7	-4.91	6	-1.8	0.036	643	0.963	0.964	16581	1
TMPPE	-4.48	5	-1.8	0.036	644	0.963	0.964	16580	1
TTC21A	-4.91	6	-1.8	0.0361	645	0.963	0.964	16579	1
RAB11FIP1	-4.91	6	-1.8	0.0362	646	0.964	0.964	16578	1
DNASE1L3	-4.48	5	-1.8	0.0363	647	0.965	0.964	16577	1
CACNA1I	-4.9	6	-1.79	0.0364	648	0.965	0.964	16576	1
STXBP4	-4.9	6	-1.79	0.0365	649	0.965	0.964	16575	1
L3MBTL2	-4.9	6	-1.79	0.0365	650	0.965	0.964	16574	1
ZNF449	-4.9	6	-1.79	0.0365	651	0.965	0.964	16573	1
CCDC40	-4.89	6	-1.79	0.0365	652	0.965	0.963	16572	1
ANKMY2	-4.89	6	-1.79	0.0368	653	0.97	0.963	16571	1
NIPAL2	-3.45	3	-1.79	0.0369	654	0.97	0.963	16570	1
SPIRE1	-4.88	6	-1.79	0.037	655	0.97	0.963	16569	1
CEACAM5	-3.98	4	-1.79	0.0371	656	0.97	0.963	16568	1
COA6	-3.98	4	-1.79	0.0371	657	0.97	0.963	16567	1
CDK14	-4.87	6	-1.78	0.0372	658	0.97	0.963	16566	1
ENO4	-4.87	6	-1.78	0.0372	659	0.97	0.963	16565	1
ZNF12	-3.44	3	-1.78	0.0374	660	0.97	0.963	16564	1
ZDHHC3	-4.86	6	-1.78	0.0375	661	0.97	0.963	16563	1
ASPHD1	-4.44	5	-1.78	0.0375	662	0.97	0.963	16562	1
KIAA0556	-4.86	6	-1.78	0.0375	663	0.97	0.963	16561	1
FANCC	-4.86	6	-1.78	0.0375	664	0.97	0.962	16560	1
RHOBTB1	-4.86	6	-1.78	0.0376	665	0.97	0.962	16559	1
PPCS	-4.44	5	-1.78	0.0376	666	0.97	0.962	16558	1
HIATL1	-4.86	6	-1.78	0.0376	667	0.97	0.962	16557	1
LAMB4	-4.86	6	-1.78	0.0377	668	0.97	0.962	16556	1
NAB2	-4.86	6	-1.78	0.0378	669	0.97	0.962	16555	1
USP49	-4.85	6	-1.78	0.0379	670	0.97	0.962	16554	1
RBBP7	-4.85	6	-1.77	0.038	671	0.97	0.962	16553	1
OR10A7	-3.96	4	-1.77	0.038	672	0.97	0.962	16552	1
COL10A1	-4.85	6	-1.77	0.0381	673	0.97	0.962	16551	1
CISD2	-3.96	4	-1.77	0.0381	674	0.97	0.962	16550	1
NOTO	-4.84	6	-1.77	0.0381	675	0.97	0.962	16549	1
ITM2C	-4.84	6	-1.77	0.0382	676	0.97	0.962	16548	1
TECPR2	-4.84	6	-1.77	0.0383	677	0.97	0.962	16547	1
CABLES1	-4.84	6	-1.77	0.0383	678	0.97	0.962	16546	1
EHBP1L1	-4.84	6	-1.77	0.0383	679	0.97	0.962	16545	1
BDKRB1	-4.42	5	-1.77	0.0384	680	0.97	0.962	16544	1
BRF2	-4.84	6	-1.77	0.0384	681	0.97	0.962	16543	1
CDH4	-4.83	6	-1.77	0.0385	682	0.97	0.962	16542	1
SPDYE3	-2.79	2	-1.77	0.0385	683	0.97	0.962	16541	1
TPD52L3	-3.42	3	-1.77	0.0385	684	0.97	0.961	16540	1
NEDD4	-4.83	6	-1.77	0.0386	685	0.971	0.961	16539	1
COQ7	-4.83	6	-1.77	0.0388	686	0.973	0.961	16538	1
CNPY4	-4.82	6	-1.76	0.0389	687	0.975	0.961	16537	1
STXBP6	-4.82	6	-1.76	0.039	688	0.976	0.961	16536	1
FEM1B	-4.82	6	-1.76	0.039	689	0.976	0.961	16535	1
C3orf70	-4.82	6	-1.76	0.0391	690	0.976	0.961	16534	1
COL4A5	-4.81	6	-1.76	0.0392	691	0.976	0.961	16533	1
EMX1	-4.81	6	-1.76	0.0392	692	0.976	0.961	16532	1
ACTN3	-4.8	6	-1.76	0.0395	693	0.983	0.96	16531	1
CD83	-4.38	5	-1.75	0.0397	694	0.984	0.96	16530	1
OR10A3	-3.39	3	-1.75	0.0397	695	0.984	0.96	16529	1
PORCN	-4.8	6	-1.75	0.0398	696	0.984	0.96	16528	1
CSMD2	-4.79	6	-1.75	0.0398	697	0.984	0.96	16527	1
GHRL	-3.38	3	-1.75	0.0402	698	0.986	0.96	16526	1
MALL	-2.76	2	-1.75	0.0402	699	0.986	0.96	16525	1
C2orf82	-4.78	6	-1.75	0.0403	700	0.986	0.96	16524	1
RNF125	-4.78	6	-1.75	0.0403	701	0.986	0.96	16523	1
TNFAIP3	-4.78	6	-1.75	0.0404	702	0.986	0.96	16522	1
BDH1	-4.77	6	-1.75	0.0405	703	0.986	0.96	16521	1
SIRT7	-4.77	6	-1.75	0.0405	704	0.986	0.96	16520	1
METTL2A	-1.95	1	-1.74	0.0405	705	0.986	0.959	16519	1
OR10AG1	-2.76	2	-1.74	0.0405	706	0.986	0.959	16518	1
NLRP8	-4.77	6	-1.74	0.0405	707	0.986	0.959	16517	1
SPSB3	-4.77	6	-1.74	0.0406	708	0.986	0.959	16516	1
APOM	-4.77	6	-1.74	0.0407	709	0.986	0.959	16515	1
C1orf172	-4.77	6	-1.74	0.0408	710	0.986	0.959	16514	1
AMBRA1	-4.76	6	-1.74	0.0409	711	0.986	0.959	16513	1
PIH1D2	-4.35	5	-1.74	0.0409	712	0.986	0.959	16512	1
PRPF4B	-4.35	5	-1.74	0.0409	713	0.986	0.959	16511	1
SNX15	-4.76	6	-1.74	0.041	714	0.986	0.959	16510	1
GDF7	-4.76	6	-1.74	0.0411	715	0.986	0.959	16509	1
PARP6	-4.76	6	-1.74	0.0411	716	0.986	0.959	16508	1
RAI2	-3.88	4	-1.74	0.0413	717	0.986	0.959	16507	1
DCAF15	-4.75	6	-1.74	0.0413	718	0.986	0.959	16506	1
COMP	-4.75	6	-1.73	0.0414	719	0.986	0.959	16505	1
RORA	-4.74	6	-1.73	0.0415	720	0.986	0.959	16504	1
PSTPIP1	-4.74	6	-1.73	0.0415	721	0.986	0.958	16503	1
GGA2	-4.74	6	-1.73	0.0416	722	0.986	0.958	16502	1
TRO	-4.74	6	-1.73	0.0417	723	0.986	0.958	16501	1
STRBP	-4.74	6	-1.73	0.0417	724	0.986	0.958	16500	1
SERTAD1	-3.35	3	-1.73	0.0417	725	0.986	0.958	16499	1
NTS	-1.93	1	-1.73	0.0418	726	0.986	0.958	16498	1
KCNMB1	-4.73	6	-1.73	0.0418	727	0.986	0.958	16497	1
KIF22	-4.73	6	-1.73	0.0422	728	0.986	0.958	16496	1
MOB2	-4.73	6	-1.73	0.0422	729	0.986	0.958	16495	1
CCDC70	-3.86	4	-1.72	0.0423	730	0.986	0.958	16494	1
THEG	-4.72	6	-1.72	0.0424	731	0.986	0.958	16493	1
ZKSCAN1	-4.72	6	-1.72	0.0424	732	0.986	0.958	16492	1
DPH2	-4.72	6	-1.72	0.0424	733	0.986	0.958	16491	1
UFL1	-4.31	5	-1.72	0.0425	734	0.986	0.958	16490	1
C15orf56	-4.31	5	-1.72	0.0425	735	0.986	0.957	16489	1
RNF113B	-4.3	5	-1.72	0.0425	736	0.986	0.957	16488	1
ARHGAP11A	-3.33	3	-1.72	0.0427	737	0.986	0.957	16487	1
DPM2	-3.84	4	-1.72	0.0428	738	0.986	0.957	16486	1
PHF3	-4.71	6	-1.72	0.0428	739	0.986	0.957	16485	1
C16orf97	-3.84	4	-1.72	0.0429	740	0.986	0.957	16484	1
ZFP14	-2.72	2	-1.72	0.0429	741	0.986	0.957	16483	1
BPGM	-4.29	5	-1.72	0.043	742	0.986	0.957	16482	1
DOK3	-4.7	6	-1.72	0.043	743	0.986	0.957	16481	1
TAX1BP1	-4.7	6	-1.72	0.043	744	0.986	0.957	16480	1
GNAZ	-4.7	6	-1.71	0.0432	745	0.986	0.957	16479	1
GDPD2	-4.7	6	-1.71	0.0432	746	0.986	0.957	16478	1
USP37	-4.7	6	-1.71	0.0433	747	0.986	0.957	16477	1
COPE	-4.69	6	-1.71	0.0436	748	0.986	0.956	16476	1
A1BG	-4.68	6	-1.71	0.0438	749	0.986	0.956	16475	1
F11R	-4.68	6	-1.71	0.0439	750	0.986	0.956	16474	1
FAM115A	-3.82	4	-1.71	0.0439	751	0.986	0.956	16473	1
TCTE3	-4.27	5	-1.71	0.0439	752	0.986	0.956	16472	1
POGZ	-4.67	6	-1.71	0.0441	753	0.986	0.956	16471	1
FOXO4	-4.67	6	-1.71	0.0441	754	0.986	0.956	16470	1
ARHGEF9	-4.67	6	-1.7	0.0441	755	0.986	0.956	16469	1
C1orf115	-4.67	6	-1.7	0.0441	756	0.986	0.956	16468	1
WDR55	-4.26	5	-1.7	0.0442	757	0.986	0.956	16467	1
OR6B2	-1.9	1	-1.7	0.0443	758	0.986	0.956	16466	1
IQCF1	-3.3	3	-1.7	0.0444	759	0.986	0.956	16465	1
TSLP	-3.81	4	-1.7	0.0445	760	0.986	0.956	16464	1
SYTL1	-4.66	6	-1.7	0.0445	761	0.986	0.956	16463	1
TASP1	-4.66	6	-1.7	0.0445	762	0.986	0.956	16462	1
ACOT7	-4.66	6	-1.7	0.0445	763	0.986	0.956	16461	1
NCKIPSD	-4.66	6	-1.7	0.0445	764	0.986	0.955	16460	1
ITGA2B	-4.66	6	-1.7	0.0445	765	0.986	0.955	16459	1
IL17D	-4.25	5	-1.7	0.0446	766	0.986	0.955	16458	1
ADAMTS9	-4.66	6	-1.7	0.0446	767	0.986	0.955	16457	1
CYP2W1	-4.66	6	-1.7	0.0447	768	0.986	0.955	16456	1
SPATA25	-4.65	6	-1.7	0.0447	769	0.986	0.955	16455	1
IFI27	-4.65	6	-1.7	0.0447	770	0.986	0.955	16454	1
STX1A	-4.65	6	-1.7	0.0449	771	0.986	0.955	16453	1
TMEM170A	-4.24	5	-1.7	0.045	772	0.986	0.955	16452	1
CEP250	-4.65	6	-1.7	0.045	773	0.986	0.955	16451	1
IFNB1	-3.29	3	-1.69	0.045	774	0.986	0.955	16450	1
SLITRK6	-4.24	5	-1.69	0.0451	775	0.986	0.955	16449	1
FOXH1	-4.64	6	-1.69	0.0451	776	0.986	0.955	16448	1
ADAD2	-4.64	6	-1.69	0.0452	777	0.986	0.955	16447	1
FAM206A	-3.79	4	-1.69	0.0452	778	0.986	0.955	16446	1
LGI3	-4.64	6	-1.69	0.0453	779	0.986	0.955	16445	1
DNAJC21	-4.23	5	-1.69	0.0454	780	0.986	0.955	16444	1
AP1M1	-4.64	6	-1.69	0.0454	781	0.986	0.955	16443	1
CHGB	-4.63	6	-1.69	0.0455	782	0.986	0.954	16442	1
ZNF382	-3.28	3	-1.69	0.0456	783	0.986	0.954	16441	1
OR51T1	-3.27	3	-1.69	0.0456	784	0.986	0.954	16440	1
SRPX	-4.63	6	-1.69	0.0457	785	0.986	0.954	16439	1
CHRNA10	-4.63	6	-1.69	0.0458	786	0.986	0.954	16438	1
USP46	-4.62	6	-1.69	0.046	787	0.986	0.954	16437	1
ZNF502	-2.67	2	-1.69	0.046	788	0.986	0.954	16436	1
EP300	-4.62	6	-1.68	0.0461	789	0.986	0.954	16435	1
POLD4	-3.27	3	-1.68	0.0461	790	0.986	0.954	16434	1
HPDL	-4.62	6	-1.68	0.0462	791	0.986	0.954	16433	1
THBS1	-4.61	6	-1.68	0.0463	792	0.986	0.954	16432	1
RBPJL	-4.61	6	-1.68	0.0464	793	0.986	0.954	16431	1
POLR2D	-2.66	2	-1.68	0.0464	794	0.986	0.954	16430	1
RNF32	-4.61	6	-1.68	0.0465	795	0.986	0.953	16429	1
MED13L	-4.61	6	-1.68	0.0465	796	0.986	0.953	16428	1
USP31	-4.6	6	-1.68	0.0467	797	0.986	0.953	16427	1
APPL1	-4.6	6	-1.68	0.0468	798	0.986	0.953	16426	0.999
TMEM125	-3.76	4	-1.68	0.0468	799	0.986	0.953	16425	0.999
HOXB4	-4.6	6	-1.68	0.0469	800	0.986	0.953	16424	0.999
RAD9A	-4.6	6	-1.68	0.0469	801	0.986	0.953	16423	0.999
ADM5	-4.6	6	-1.68	0.0469	802	0.986	0.953	16422	0.999
ZNF395	-4.6	6	-1.68	0.047	803	0.986	0.953	16421	0.999
CYP2S1	-4.6	6	-1.67	0.047	804	0.986	0.953	16420	0.999
LCAT	-4.59	6	-1.67	0.047	805	0.986	0.953	16419	0.999
TXNDC17	-4.59	6	-1.67	0.047	806	0.986	0.953	16418	0.999
RALGPS2	-4.59	6	-1.67	0.047	807	0.986	0.953	16417	0.999
FTH1	-3.25	3	-1.67	0.0471	808	0.986	0.953	16416	0.999
ZNF226	-3.75	4	-1.67	0.0471	809	0.986	0.953	16415	0.999
OR8D2	-1.87	1	-1.67	0.0471	810	0.986	0.953	16414	0.999
DYRK3	-4.59	6	-1.67	0.0472	811	0.986	0.953	16413	0.999
GAL3ST3	-4.59	6	-1.67	0.0472	812	0.986	0.953	16412	0.999
HNF1B	-4.59	6	-1.67	0.0472	813	0.986	0.953	16411	0.999
PCDH7	-4.59	6	-1.67	0.0472	814	0.986	0.953	16410	0.999
KRTAP13-2	-2.65	2	-1.67	0.0472	815	0.986	0.953	16409	0.999
CHPF2	-4.59	6	-1.67	0.0474	816	0.986	0.953	16408	0.999
ACP1	-2.65	2	-1.67	0.0474	817	0.986	0.953	16407	0.999
B3GAT2	-4.59	6	-1.67	0.0474	818	0.986	0.953	16406	0.999
GPR56	-4.58	6	-1.67	0.0474	819	0.986	0.953	16405	0.999
FBXO34	-4.58	6	-1.67	0.0475	820	0.986	0.953	16404	0.999
PPM1J	-4.58	6	-1.67	0.0475	821	0.986	0.953	16403	0.999
VSTM2A	-4.58	6	-1.67	0.0476	822	0.986	0.952	16402	0.999
IL4R	-4.58	6	-1.67	0.0477	823	0.986	0.952	16401	0.999
LRRC45	-4.57	6	-1.67	0.0478	824	0.986	0.952	16400	0.999
PCDH11X	-2.64	2	-1.67	0.0479	825	0.986	0.952	16399	0.999
UTY	-4.57	6	-1.67	0.0479	826	0.986	0.952	16398	0.999
CCDC115	-4.17	5	-1.67	0.0479	827	0.986	0.952	16397	0.999
PIGT	-4.57	6	-1.67	0.048	828	0.986	0.952	16396	0.999
BTBD18	-4.17	5	-1.66	0.0481	829	0.986	0.952	16395	0.999
ARHGAP44	-4.57	6	-1.66	0.0481	830	0.986	0.952	16394	0.999
HESX1	-2.64	2	-1.66	0.0481	831	0.986	0.952	16393	0.999
CDKN2AIPNL	-1.86	1	-1.66	0.0482	832	0.986	0.952	16392	0.999
GAS7	-4.56	6	-1.66	0.0482	833	0.986	0.952	16391	0.999
PPP2R5D	-4.56	6	-1.66	0.0483	834	0.986	0.952	16390	0.999
RSPO3	-2.63	2	-1.66	0.0484	835	0.986	0.952	16389	0.999
USP13	-4.56	6	-1.66	0.0484	836	0.986	0.952	16388	0.999
EBLN1	-3.72	4	-1.66	0.0484	837	0.986	0.952	16387	0.999
LHPP	-4.56	6	-1.66	0.0484	838	0.986	0.952	16386	0.999
PRR11	-4.56	6	-1.66	0.0484	839	0.986	0.952	16385	0.999
C11orf53	-4.16	5	-1.66	0.0484	840	0.986	0.952	16384	0.999
MLXIPL	-4.56	6	-1.66	0.0484	841	0.986	0.952	16383	0.999
CSE1L	-4.56	6	-1.66	0.0485	842	0.986	0.952	16382	0.999
IKZF2	-4.56	6	-1.66	0.0485	843	0.986	0.951	16381	0.999
CLK3	-4.56	6	-1.66	0.0485	844	0.986	0.951	16380	0.999
HEPN1	-3.72	4	-1.66	0.0487	845	0.986	0.951	16379	0.999
BAG4	-3.22	3	-1.66	0.0487	846	0.986	0.951	16378	0.999
ZDHHC19	-4.55	6	-1.66	0.0489	847	0.986	0.951	16377	0.999
CD9	-4.55	6	-1.66	0.0489	848	0.986	0.951	16376	0.999
C12orf55	-4.55	6	-1.66	0.0489	849	0.986	0.951	16375	0.999
PTGDS	-4.55	6	-1.66	0.049	850	0.986	0.951	16374	0.999
RTP3	-4.15	5	-1.65	0.049	851	0.986	0.951	16373	0.999
KATNA1	-4.54	6	-1.65	0.0491	852	0.986	0.951	16372	0.999
LRRC32	-3.71	4	-1.65	0.0491	853	0.986	0.951	16371	0.999
QARS	-4.15	5	-1.65	0.0491	854	0.986	0.951	16370	0.999
AJUBA	-4.54	6	-1.65	0.0491	855	0.986	0.951	16369	0.999
SLC6A16	-4.54	6	-1.65	0.0492	856	0.986	0.951	16368	0.999
KLHL33	-4.54	6	-1.65	0.0492	857	0.986	0.951	16367	0.999
CAPSL	-2.62	2	-1.65	0.0493	858	0.986	0.951	16366	0.999
FER	-3.7	4	-1.65	0.0493	859	0.986	0.951	16365	0.999
LURAP1	-4.14	5	-1.65	0.0493	860	0.986	0.951	16364	0.999
MUC20	-3.21	3	-1.65	0.0494	861	0.986	0.951	16363	0.999
CLEC12B	-4.53	6	-1.65	0.0494	862	0.986	0.951	16362	0.999
ABLIM2	-4.53	6	-1.65	0.0494	863	0.986	0.951	16361	0.999
PLIN2	-3.2	3	-1.65	0.0495	864	0.987	0.95	16360	0.999
KIF17	-4.53	6	-1.65	0.0496	865	0.987	0.95	16359	0.999
LSR	-4.53	6	-1.65	0.0496	866	0.987	0.95	16358	0.999
L3MBTL1	-4.53	6	-1.65	0.0497	867	0.987	0.95	16357	0.999
TAGLN3	-4.52	6	-1.65	0.05	868	0.989	0.95	16356	0.999
TBC1D25	-4.52	6	-1.64	0.0501	869	0.989	0.95	16355	0.999
C6orf226	-3.69	4	-1.64	0.0501	870	0.989	0.95	16354	0.999
NBR1	-4.52	6	-1.64	0.0502	871	0.989	0.95	16353	0.999
NKX2-8	-4.51	6	-1.64	0.0502	872	0.989	0.95	16352	0.999
NR1I3	-4.51	6	-1.64	0.0502	873	0.989	0.95	16351	0.999
VPS9D1	-4.51	6	-1.64	0.0503	874	0.989	0.95	16350	0.999
GLI1	-4.51	6	-1.64	0.0503	875	0.989	0.95	16349	0.999
TOMM34	-4.51	6	-1.64	0.0505	876	0.989	0.949	16348	0.999
PLXNB2	-4.5	6	-1.64	0.0506	877	0.989	0.949	16347	0.999
PSMA5	-4.11	5	-1.64	0.0506	878	0.989	0.949	16346	0.999
LOXL1	-4.5	6	-1.64	0.0506	879	0.989	0.949	16345	0.999
ZKSCAN2	-4.5	6	-1.64	0.0507	880	0.989	0.949	16344	0.999
GPR141	-4.11	5	-1.64	0.0507	881	0.989	0.949	16343	0.999
ATF6B	-4.5	6	-1.64	0.0508	882	0.989	0.949	16342	0.999
GDF5	-4.5	6	-1.64	0.0508	883	0.989	0.949	16341	0.999
ADPRM	-4.5	6	-1.64	0.0508	884	0.989	0.949	16340	0.999
CHRNB2	-4.5	6	-1.64	0.0509	885	0.989	0.949	16339	0.999
LMOD2	-4.49	6	-1.64	0.051	886	0.989	0.949	16338	0.999
GOLGA1	-4.49	6	-1.63	0.0511	887	0.989	0.949	16337	0.999
PVRL4	-4.49	6	-1.63	0.0512	888	0.989	0.949	16336	0.999
C1orf194	-4.1	5	-1.63	0.0512	889	0.989	0.949	16335	0.999
AGFG2	-4.49	6	-1.63	0.0512	890	0.989	0.949	16334	0.999
STK32B	-4.49	6	-1.63	0.0513	891	0.989	0.949	16333	0.999
VARS	-4.09	5	-1.63	0.0514	892	0.989	0.949	16332	0.999
ATP8B1	-4.48	6	-1.63	0.0514	893	0.989	0.949	16331	0.999
OR2A12	-3.66	4	-1.63	0.0515	894	0.989	0.949	16330	0.999
IZUMO4	-4.48	6	-1.63	0.0516	895	0.989	0.948	16329	0.999
CCL14	-4.09	5	-1.63	0.0516	896	0.989	0.948	16328	0.999
SHPK	-4.48	6	-1.63	0.0516	897	0.989	0.948	16327	0.999
RP1L1	-4.48	6	-1.63	0.0518	898	0.989	0.948	16326	0.999
FRMD6	-4.48	6	-1.63	0.0518	899	0.989	0.948	16325	0.999
TXNRD3	-3.16	3	-1.63	0.0519	900	0.989	0.948	16324	0.999
ITM2A	-4.47	6	-1.63	0.0519	901	0.989	0.948	16323	0.999
SUN3	-4.47	6	-1.63	0.052	902	0.989	0.948	16322	0.999
NPAT	-4.47	6	-1.62	0.0521	903	0.989	0.948	16321	0.999
ANKRD35	-4.47	6	-1.62	0.0522	904	0.989	0.948	16320	0.999
CEP128	-4.47	6	-1.62	0.0522	905	0.989	0.948	16319	0.999
CHAT	-4.47	6	-1.62	0.0522	906	0.989	0.948	16318	0.999
ELAVL2	-4.47	6	-1.62	0.0522	907	0.989	0.948	16317	0.999
EVC	-4.46	6	-1.62	0.0523	908	0.989	0.948	16316	0.999
TTC7B	-4.46	6	-1.62	0.0523	909	0.989	0.948	16315	0.999
CUX1	-4.46	6	-1.62	0.0525	910	0.989	0.948	16314	0.999
SEL1L	-4.46	6	-1.62	0.0525	911	0.989	0.947	16313	0.999
OR51Q1	-4.07	5	-1.62	0.0527	912	0.989	0.947	16312	0.999
ARMC5	-4.45	6	-1.62	0.0528	913	0.989	0.947	16311	0.999
SPINT2	-4.45	6	-1.62	0.0528	914	0.989	0.947	16310	0.999
FBXO38	-4.45	6	-1.62	0.053	915	0.989	0.947	16309	0.999
VAMP4	-1.81	1	-1.61	0.0533	916	0.989	0.947	16308	0.999
GINS3	-4.05	5	-1.61	0.0534	917	0.989	0.947	16307	0.999
RAB3IP	-4.44	6	-1.61	0.0534	918	0.989	0.947	16306	0.999
ST5	-4.44	6	-1.61	0.0534	919	0.989	0.947	16305	0.999
MUM1	-4.44	6	-1.61	0.0535	920	0.989	0.947	16304	0.999
ATAD2	-4.43	6	-1.61	0.0537	921	0.989	0.946	16303	0.999
KCNQ4	-4.43	6	-1.61	0.0538	922	0.989	0.946	16302	0.999
MED26	-4.43	6	-1.61	0.0538	923	0.989	0.946	16301	0.999
DNA2	-4.42	6	-1.61	0.054	924	0.989	0.946	16300	0.999
ZNF83	-1.81	1	-1.61	0.054	925	0.989	0.946	16299	0.999
BTN3A3	-3.13	3	-1.61	0.054	926	0.989	0.946	16298	0.999
PLTP	-4.42	6	-1.61	0.0542	927	0.989	0.946	16297	0.999
SLC35B1	-3.61	4	-1.61	0.0542	928	0.989	0.946	16296	0.999
POSTN	-4.42	6	-1.61	0.0542	929	0.989	0.946	16295	0.999
STK17B	-3.12	3	-1.61	0.0542	930	0.989	0.946	16294	0.999
FAM198A	-4.42	6	-1.61	0.0542	931	0.989	0.946	16293	0.999
MAGEB6	-1.8	1	-1.6	0.0543	932	0.989	0.946	16292	0.999
HS3ST3B1	-4.03	5	-1.6	0.0545	933	0.989	0.946	16291	0.999
NR2C1	-4.41	6	-1.6	0.0545	934	0.989	0.945	16290	0.999
MROH7	-4.41	6	-1.6	0.0545	935	0.989	0.945	16289	0.999
PDGFRL	-4.41	6	-1.6	0.0547	936	0.989	0.945	16288	0.999
NUDT15	-1.8	1	-1.6	0.0547	937	0.989	0.945	16287	0.999
TSC22D2	-4.02	5	-1.6	0.0548	938	0.989	0.945	16286	0.999
POU2F3	-4.4	6	-1.6	0.0551	939	0.989	0.945	16285	0.999
FFAR1	-4.01	5	-1.6	0.0552	940	0.989	0.945	16284	0.999
PTOV1	-4.4	6	-1.6	0.0552	941	0.989	0.945	16283	0.999
NUDT18	-4.4	6	-1.6	0.0552	942	0.989	0.945	16282	0.999
ERLIN1	-4.39	6	-1.6	0.0553	943	0.989	0.945	16281	0.999
TSKS	-4.39	6	-1.6	0.0553	944	0.989	0.945	16280	0.999
USB1	-4.39	6	-1.59	0.0554	945	0.989	0.945	16279	0.999
MYCL1	-4.01	5	-1.59	0.0555	946	0.989	0.945	16278	0.999
RGS20	-4.39	6	-1.59	0.0555	947	0.989	0.945	16277	0.999
DR1	-4.01	5	-1.59	0.0555	948	0.989	0.944	16276	0.999
SIN3B	-4.39	6	-1.59	0.0555	949	0.989	0.944	16275	0.999
ZNF260	-2.53	2	-1.59	0.0558	950	0.989	0.944	16274	0.999
CCDC89	-4.38	6	-1.59	0.0558	951	0.989	0.944	16273	0.999
TAF13	-1.79	1	-1.59	0.0558	952	0.989	0.944	16272	0.999
C15orf61	-4	5	-1.59	0.0558	953	0.989	0.944	16271	0.999
GLI2	-4.38	6	-1.59	0.056	954	0.989	0.944	16270	0.999
SLC24A3	-4.38	6	-1.59	0.0561	955	0.989	0.944	16269	0.999
CORO2A	-4.37	6	-1.59	0.0562	956	0.989	0.944	16268	0.999
KLK13	-4.37	6	-1.59	0.0562	957	0.989	0.944	16267	0.999
ACO2	-3.99	5	-1.59	0.0563	958	0.989	0.944	16266	0.999
CCNB1IP1	-1.78	1	-1.59	0.0564	959	0.989	0.944	16265	0.999
CELSR2	-4.37	6	-1.59	0.0564	960	0.989	0.944	16264	0.999
EPHA5	-4.37	6	-1.59	0.0565	961	0.989	0.944	16263	0.999
OR56B4	-3.09	3	-1.58	0.0566	962	0.989	0.943	16262	0.999
ZNF236	-4.36	6	-1.58	0.0568	963	0.989	0.943	16261	0.999
ZNF2	-4.36	6	-1.58	0.0568	964	0.989	0.943	16260	0.999
COL6A3	-4.36	6	-1.58	0.0569	965	0.989	0.943	16259	0.999
SYNGR1	-4.36	6	-1.58	0.0569	966	0.989	0.943	16258	0.999
GSK3A	-4.36	6	-1.58	0.057	967	0.989	0.943	16257	0.999
APOBR	-4.36	6	-1.58	0.057	968	0.989	0.943	16256	0.999
MTMR14	-4.35	6	-1.58	0.0571	969	0.989	0.943	16255	0.999
CENPE	-3.55	4	-1.58	0.0571	970	0.989	0.943	16254	0.999
HS3ST2	-4.35	6	-1.58	0.0571	971	0.989	0.943	16253	0.999
DBNL	-4.35	6	-1.58	0.0572	972	0.989	0.943	16252	0.999
ZNF521	-4.35	6	-1.58	0.0572	973	0.989	0.943	16251	0.999
SCG3	-3.97	5	-1.58	0.0573	974	0.989	0.943	16250	0.999
TRPV3	-4.34	6	-1.58	0.0575	975	0.989	0.942	16249	0.999
LEPREL4	-4.34	6	-1.57	0.0577	976	0.989	0.942	16248	0.999
TGFB3	-4.34	6	-1.57	0.0577	977	0.989	0.942	16247	0.999
PTPRN2	-4.34	6	-1.57	0.0577	978	0.989	0.942	16246	0.999
PECR	-4.34	6	-1.57	0.0577	979	0.989	0.942	16245	0.999
SUZ12	-3.96	5	-1.57	0.0579	980	0.989	0.942	16244	0.999
PRRT4	-4.33	6	-1.57	0.058	981	0.989	0.942	16243	0.999
L1CAM	-4.33	6	-1.57	0.058	982	0.989	0.942	16242	0.999
TUBD1	-3.96	5	-1.57	0.058	983	0.989	0.942	16241	0.999
VTI1A	-4.33	6	-1.57	0.0581	984	0.989	0.942	16240	0.999
DNAJA1	-1.77	1	-1.57	0.0581	985	0.989	0.942	16239	0.999
CNIH4	-3.95	5	-1.57	0.0582	986	0.989	0.942	16238	0.999
TBC1D8	-4.33	6	-1.57	0.0583	987	0.989	0.942	16237	0.999
ATP5I	-3.06	3	-1.57	0.0583	988	0.989	0.942	16236	0.999
HIST1H1C	-3.53	4	-1.57	0.0585	989	0.989	0.941	16235	0.999
NUP133	-4.32	6	-1.57	0.0586	990	0.989	0.941	16234	0.999
HIST1H4B	-1.76	1	-1.57	0.0586	991	0.989	0.941	16233	0.999
DTD2	-3.53	4	-1.57	0.0588	992	0.989	0.941	16232	0.999
ZBTB47	-4.32	6	-1.57	0.0588	993	0.989	0.941	16231	0.999
BNIP2	-4.32	6	-1.56	0.0588	994	0.989	0.941	16230	0.999
TOP1	-4.32	6	-1.56	0.0588	995	0.989	0.941	16229	0.999
GABRG3	-4.32	6	-1.56	0.0589	996	0.989	0.941	16228	0.999
PAWR	-3.52	4	-1.56	0.0589	997	0.989	0.941	16227	0.999
C4orf46	-1.76	1	-1.56	0.0591	998	0.989	0.941	16226	0.999
LMTK3	-4.31	6	-1.56	0.0592	999	0.989	0.941	16225	0.999
MUC22	-4.31	6	-1.56	0.0592	1000	0.989	0.941	16224	0.999
MAP2K5	-4.31	6	-1.56	0.0593	1001	0.989	0.941	16223	0.999
ACTBL2	-4.31	6	-1.56	0.0593	1002	0.989	0.941	16222	0.999
PSMB10	-4.3	6	-1.56	0.0594	1003	0.989	0.941	16221	0.999
ZNF610	-2.48	2	-1.56	0.0594	1004	0.989	0.941	16220	0.999
GCNT3	-3.93	5	-1.56	0.0594	1005	0.989	0.941	16219	0.999
RNF138	-2.48	2	-1.56	0.0597	1006	0.989	0.94	16218	0.999
TARM1	-4.3	6	-1.56	0.0598	1007	0.989	0.94	16217	0.999
TCEANC2	-4.29	6	-1.56	0.0599	1008	0.989	0.94	16216	0.999
SIGLEC9	-3.51	4	-1.56	0.0599	1009	0.989	0.94	16215	0.999
C1orf54	-3.5	4	-1.55	0.0602	1010	0.989	0.94	16214	0.998
HPSE2	-4.29	6	-1.55	0.0602	1011	0.989	0.94	16213	0.998
GTF3C4	-4.29	6	-1.55	0.0602	1012	0.989	0.94	16212	0.998
IKZF1	-4.28	6	-1.55	0.0603	1013	0.989	0.94	16211	0.998
IHH	-4.28	6	-1.55	0.0604	1014	0.989	0.94	16210	0.998
DOC2A	-4.28	6	-1.55	0.0604	1015	0.989	0.94	16209	0.998
HYAL1	-4.28	6	-1.55	0.0605	1016	0.989	0.94	16208	0.998
CDCA5	-4.28	6	-1.55	0.0605	1017	0.989	0.939	16207	0.998
TTLL5	-4.28	6	-1.55	0.0605	1018	0.989	0.939	16206	0.998
TBC1D19	-4.28	6	-1.55	0.0607	1019	0.989	0.939	16205	0.998
ATRIP	-4.27	6	-1.55	0.0608	1020	0.989	0.939	16204	0.998
CAMK2A	-4.27	6	-1.55	0.0609	1021	0.989	0.939	16203	0.998
MACROD2	-4.27	6	-1.55	0.061	1022	0.989	0.939	16202	0.998
WRAP73	-4.27	6	-1.55	0.0611	1023	0.989	0.939	16201	0.998
TBC1D23	-4.27	6	-1.55	0.0612	1024	0.989	0.939	16200	0.998
CTSK	-4.26	6	-1.54	0.0612	1025	0.989	0.939	16199	0.998
LCMT2	-4.26	6	-1.54	0.0613	1026	0.989	0.939	16198	0.998
C2orf42	-4.26	6	-1.54	0.0613	1027	0.989	0.939	16197	0.998
GPX7	-3.89	5	-1.54	0.0614	1028	0.989	0.939	16196	0.998
IL1R2	-4.26	6	-1.54	0.0614	1029	0.989	0.939	16195	0.998
MOCS3	-3.48	4	-1.54	0.0616	1030	0.989	0.938	16194	0.998
REN	-4.26	6	-1.54	0.0616	1031	0.989	0.938	16193	0.998
BPHL	-4.26	6	-1.54	0.0617	1032	0.989	0.938	16192	0.998
CASP4	-2.46	2	-1.54	0.0617	1033	0.989	0.938	16191	0.998
DCTD	-4.25	6	-1.54	0.0619	1034	0.989	0.938	16190	0.998
RARRES2	-3.88	5	-1.54	0.062	1035	0.989	0.938	16189	0.998
OR5J2	-2.45	2	-1.54	0.062	1036	0.989	0.938	16188	0.998
KDM4C	-4.24	6	-1.53	0.0624	1037	0.989	0.938	16187	0.998
PCDH15	-4.24	6	-1.53	0.0625	1038	0.989	0.937	16186	0.998
LRRC66	-3.87	5	-1.53	0.0626	1039	0.989	0.937	16185	0.998
SMARCAL1	-4.24	6	-1.53	0.0627	1040	0.989	0.937	16184	0.998
RC3H1	-4.23	6	-1.53	0.0627	1041	0.989	0.937	16183	0.998
MCM2	-4.23	6	-1.53	0.0627	1042	0.989	0.937	16182	0.998
WNT9A	-4.23	6	-1.53	0.0627	1043	0.989	0.937	16181	0.998
GJB6	-4.23	6	-1.53	0.0627	1044	0.989	0.937	16180	0.998
FAM71E2	-4.23	6	-1.53	0.0627	1045	0.989	0.937	16179	0.998
GCGR	-4.23	6	-1.53	0.0627	1046	0.989	0.937	16178	0.998
C2orf68	-4.23	6	-1.53	0.0628	1047	0.989	0.937	16177	0.998
GLRX2	-2.44	2	-1.53	0.0628	1048	0.989	0.937	16176	0.998
TMPRSS6	-4.23	6	-1.53	0.0629	1049	0.989	0.937	16175	0.998
CYLD	-4.23	6	-1.53	0.0629	1050	0.989	0.937	16174	0.998
APBA3	-4.23	6	-1.53	0.0629	1051	0.989	0.937	16173	0.998
TMEM160	-4.23	6	-1.53	0.063	1052	0.989	0.937	16172	0.998
DGUOK	-4.23	6	-1.53	0.0631	1053	0.989	0.937	16171	0.998
ST6GAL2	-4.23	6	-1.53	0.0631	1054	0.989	0.937	16170	0.998
HECTD4	-4.23	6	-1.53	0.0631	1055	0.989	0.937	16169	0.998
PM20D2	-4.22	6	-1.53	0.0632	1056	0.989	0.937	16168	0.998
ARTN	-2.99	3	-1.53	0.0633	1057	0.989	0.937	16167	0.998
ZNF350	-2.44	2	-1.53	0.0633	1058	0.989	0.937	16166	0.998
PLA2G3	-4.22	6	-1.53	0.0633	1059	0.989	0.937	16165	0.998
HIST1H2BA	-2.44	2	-1.53	0.0633	1060	0.989	0.937	16164	0.998
HSF5	-4.22	6	-1.53	0.0633	1061	0.989	0.937	16163	0.998
SRPK2	-2.98	3	-1.53	0.0634	1062	0.989	0.937	16162	0.998
HAGH	-4.22	6	-1.53	0.0635	1063	0.989	0.937	16161	0.998
ARSI	-4.22	6	-1.53	0.0636	1064	0.989	0.936	16160	0.998
NSDHL	-4.22	6	-1.53	0.0636	1065	0.989	0.936	16159	0.998
RASSF6	-2.98	3	-1.52	0.0637	1066	0.989	0.936	16158	0.998
CDH5	-4.21	6	-1.52	0.0637	1067	0.989	0.936	16157	0.998
PARVG	-4.21	6	-1.52	0.0638	1068	0.989	0.936	16156	0.998
DECR2	-4.21	6	-1.52	0.0639	1069	0.989	0.936	16155	0.998
SDHAF2	-3.84	5	-1.52	0.064	1070	0.989	0.936	16154	0.998
COG1	-4.21	6	-1.52	0.064	1071	0.989	0.936	16153	0.998
CREBL2	-3.43	4	-1.52	0.064	1072	0.989	0.936	16152	0.998
NHEJ1	-3.84	5	-1.52	0.0642	1073	0.989	0.936	16151	0.998
PCOLCE2	-4.2	6	-1.52	0.0642	1074	0.989	0.936	16150	0.998
FAM102A	-4.2	6	-1.52	0.0642	1075	0.989	0.936	16149	0.998
MRGPRE	-3.84	5	-1.52	0.0643	1076	0.989	0.936	16148	0.998
PAGE3	-2.97	3	-1.52	0.0643	1077	0.989	0.936	16147	0.998
MAST1	-4.2	6	-1.52	0.0643	1078	0.989	0.936	16146	0.998
TMPRSS2	-4.2	6	-1.52	0.0643	1079	0.989	0.936	16145	0.998
HRSP12	-2.97	3	-1.52	0.0643	1080	0.989	0.936	16144	0.998
ANKIB1	-4.2	6	-1.52	0.0644	1081	0.989	0.936	16143	0.998
PHRF1	-4.2	6	-1.52	0.0644	1082	0.989	0.936	16142	0.998
MIER1	-4.2	6	-1.52	0.0645	1083	0.989	0.936	16141	0.998
MEPE	-3.83	5	-1.52	0.0645	1084	0.989	0.935	16140	0.998
CLCA1	-4.2	6	-1.52	0.0645	1085	0.989	0.935	16139	0.998
PCDH9	-4.2	6	-1.52	0.0645	1086	0.989	0.935	16138	0.998
WBSCR28	-2.97	3	-1.52	0.0646	1087	0.989	0.935	16137	0.998
AQP9	-4.19	6	-1.52	0.0647	1088	0.989	0.935	16136	0.998
TCTN3	-4.19	6	-1.52	0.0647	1089	0.989	0.935	16135	0.998
GAS8	-4.19	6	-1.52	0.0648	1090	0.989	0.935	16134	0.998
BGLAP	-4.19	6	-1.52	0.0649	1091	0.989	0.935	16133	0.998
LRFN2	-4.19	6	-1.51	0.0649	1092	0.989	0.935	16132	0.998
FUT1	-3.42	4	-1.51	0.0649	1093	0.989	0.935	16131	0.998
RAD52	-4.19	6	-1.51	0.065	1094	0.989	0.935	16130	0.998
KRT35	-4.19	6	-1.51	0.065	1095	0.989	0.935	16129	0.998
ING3	-4.19	6	-1.51	0.0651	1096	0.989	0.935	16128	0.998
ADIPOR1	-3.42	4	-1.51	0.0652	1097	0.989	0.935	16127	0.998
AQP5	-4.18	6	-1.51	0.0653	1098	0.989	0.935	16126	0.998
NISCH	-4.18	6	-1.51	0.0653	1099	0.989	0.935	16125	0.998
DNAJC12	-3.41	4	-1.51	0.0653	1100	0.989	0.935	16124	0.998
PTH1R	-4.18	6	-1.51	0.0653	1101	0.989	0.935	16123	0.998
FGD6	-4.18	6	-1.51	0.0653	1102	0.989	0.935	16122	0.998
TBC1D10A	-4.18	6	-1.51	0.0654	1103	0.989	0.935	16121	0.998
KIFC3	-4.18	6	-1.51	0.0655	1104	0.989	0.935	16120	0.998
NECAB1	-4.17	6	-1.51	0.0656	1105	0.989	0.934	16119	0.998
SYP	-4.17	6	-1.51	0.0656	1106	0.989	0.934	16118	0.998
ZAR1	-3.81	5	-1.51	0.0656	1107	0.989	0.934	16117	0.998
UBR1	-4.17	6	-1.51	0.0658	1108	0.989	0.934	16116	0.998
EXD1	-4.17	6	-1.51	0.0658	1109	0.989	0.934	16115	0.998
FAT2	-4.17	6	-1.51	0.0658	1110	0.989	0.934	16114	0.998
CALM1	-1.7	1	-1.51	0.0658	1111	0.989	0.934	16113	0.998
MSLN	-4.17	6	-1.51	0.0659	1112	0.989	0.934	16112	0.998
ANKRD27	-4.17	6	-1.51	0.0659	1113	0.989	0.934	16111	0.998
CCDC116	-4.17	6	-1.51	0.0659	1114	0.989	0.934	16110	0.998
SETD9	-2.95	3	-1.51	0.0659	1115	0.989	0.934	16109	0.998
TMEM201	-4.17	6	-1.51	0.066	1116	0.989	0.934	16108	0.998
CD109	-4.17	6	-1.51	0.066	1117	0.989	0.934	16107	0.998
GRN	-4.17	6	-1.51	0.066	1118	0.989	0.934	16106	0.998
GRIPAP1	-4.17	6	-1.51	0.0661	1119	0.989	0.934	16105	0.998
BCO2	-4.17	6	-1.51	0.0661	1120	0.989	0.934	16104	0.998
GUCY1B3	-4.17	6	-1.51	0.0661	1121	0.989	0.934	16103	0.998
SLC22A7	-4.16	6	-1.51	0.0661	1122	0.989	0.934	16102	0.998
CLDN11	-4.16	6	-1.51	0.0661	1123	0.989	0.934	16101	0.998
B3GNT9	-3.4	4	-1.5	0.0662	1124	0.989	0.934	16100	0.998
PHF17	-4.16	6	-1.5	0.0662	1125	0.989	0.934	16099	0.998
WDR81	-4.16	6	-1.5	0.0662	1126	0.989	0.934	16098	0.998
COLEC11	-4.16	6	-1.5	0.0664	1127	0.989	0.934	16097	0.998
AUTS2	-4.16	6	-1.5	0.0664	1128	0.989	0.934	16096	0.998
CISD3	-3.8	5	-1.5	0.0665	1129	0.989	0.934	16095	0.998
RAB27B	-2.4	2	-1.5	0.0665	1130	0.989	0.934	16094	0.998
HRH3	-4.16	6	-1.5	0.0665	1131	0.989	0.933	16093	0.998
SYCN	-4.16	6	-1.5	0.0665	1132	0.989	0.933	16092	0.998
LRBA	-4.16	6	-1.5	0.0665	1133	0.989	0.933	16091	0.998
FCHSD2	-4.16	6	-1.5	0.0666	1134	0.989	0.933	16090	0.998
IP6K2	-4.16	6	-1.5	0.0666	1135	0.989	0.933	16089	0.998
GPX5	-4.15	6	-1.5	0.0666	1136	0.989	0.933	16088	0.998
PALD1	-4.15	6	-1.5	0.0668	1137	0.989	0.933	16087	0.998
KIF2A	-4.15	6	-1.5	0.0668	1138	0.989	0.933	16086	0.998
KRTAP21-3	-1.69	1	-1.5	0.0669	1139	0.989	0.933	16085	0.998
TRPT1	-4.15	6	-1.5	0.0669	1140	0.989	0.933	16084	0.998
KPRP	-4.15	6	-1.5	0.0671	1141	0.989	0.933	16083	0.998
FGFR4	-3.79	5	-1.5	0.0671	1142	0.989	0.933	16082	0.998
MESDC2	-3.38	4	-1.5	0.0672	1143	0.989	0.933	16081	0.998
ADAP2	-4.14	6	-1.5	0.0672	1144	0.989	0.933	16080	0.998
CNOT2	-4.14	6	-1.5	0.0672	1145	0.989	0.933	16079	0.998
POU2F1	-4.14	6	-1.5	0.0672	1146	0.989	0.933	16078	0.998
FNDC1	-4.14	6	-1.5	0.0673	1147	0.989	0.933	16077	0.998
FAM196A	-3.78	5	-1.49	0.0675	1148	0.989	0.933	16076	0.998
ELMO1	-4.14	6	-1.49	0.0675	1149	0.989	0.932	16075	0.998
RBMS2	-2.92	3	-1.49	0.0676	1150	0.989	0.932	16074	0.998
CTTNBP2	-4.14	6	-1.49	0.0676	1151	0.989	0.932	16073	0.998
CD200R1	-2.39	2	-1.49	0.0676	1152	0.989	0.932	16072	0.998
ZBTB21	-4.13	6	-1.49	0.0677	1153	0.989	0.932	16071	0.998
DNAH5	-4.13	6	-1.49	0.0677	1154	0.989	0.932	16070	0.998
HAO2	-4.13	6	-1.49	0.0677	1155	0.989	0.932	16069	0.998
HMOX1	-4.13	6	-1.49	0.0677	1156	0.989	0.932	16068	0.998
EMILIN3	-4.13	6	-1.49	0.0678	1157	0.989	0.932	16067	0.998
SEPHS1	-3.37	4	-1.49	0.0678	1158	0.989	0.932	16066	0.998
ALCAM	-4.13	6	-1.49	0.0679	1159	0.989	0.932	16065	0.998
GTF2IRD1	-4.13	6	-1.49	0.0679	1160	0.989	0.932	16064	0.998
SEPT10	-2.92	3	-1.49	0.0679	1161	0.989	0.932	16063	0.998
ZNF440	-1.69	1	-1.49	0.0679	1162	0.989	0.932	16062	0.998
FOXN4	-4.13	6	-1.49	0.0679	1163	0.989	0.932	16061	0.998
TRIM21	-4.13	6	-1.49	0.068	1164	0.989	0.932	16060	0.998
CHIA	-3.77	5	-1.49	0.068	1165	0.989	0.932	16059	0.998
MADCAM1	-3.77	5	-1.49	0.068	1166	0.989	0.932	16058	0.998
OR6B3	-2.92	3	-1.49	0.0682	1167	0.989	0.932	16057	0.998
ABHD14B	-4.12	6	-1.49	0.0684	1168	0.989	0.932	16056	0.998
RNASE7	-2.91	3	-1.49	0.0684	1169	0.989	0.932	16055	0.998
EIF4EBP1	-2.38	2	-1.49	0.0685	1170	0.989	0.932	16054	0.998
EXOSC4	-3.76	5	-1.49	0.0685	1171	0.989	0.931	16053	0.998
TANK	-4.12	6	-1.49	0.0685	1172	0.989	0.931	16052	0.998
CHD1	-4.12	6	-1.49	0.0686	1173	0.989	0.931	16051	0.998
MED10	-3.36	4	-1.48	0.0688	1174	0.989	0.931	16050	0.998
IL33	-2.37	2	-1.48	0.0689	1175	0.989	0.931	16049	0.998
SNX20	-4.11	6	-1.48	0.0691	1176	0.989	0.931	16048	0.998
PHYHIP	-4.11	6	-1.48	0.0691	1177	0.989	0.931	16047	0.998
MAPKAPK2	-4.11	6	-1.48	0.0692	1178	0.989	0.931	16046	0.998
ALG13	-4.1	6	-1.48	0.0693	1179	0.989	0.931	16045	0.998
RAB25	-3.74	5	-1.48	0.0694	1180	0.989	0.931	16044	0.998
ACCS	-4.1	6	-1.48	0.0694	1181	0.989	0.931	16043	0.998
AFF1	-4.1	6	-1.48	0.0695	1182	0.989	0.931	16042	0.998
DSCAML1	-4.1	6	-1.48	0.0695	1183	0.989	0.93	16041	0.998
TSPAN2	-3.74	5	-1.48	0.0696	1184	0.989	0.93	16040	0.998
ATP2A1	-4.1	6	-1.48	0.0696	1185	0.989	0.93	16039	0.998
TLR10	-2.9	3	-1.48	0.0697	1186	0.989	0.93	16038	0.998
OR2W1	-1.67	1	-1.48	0.0699	1187	0.989	0.93	16037	0.998
PINLYP	-4.09	6	-1.48	0.0699	1188	0.989	0.93	16036	0.998
OR7E24	-1.67	1	-1.48	0.07	1189	0.989	0.93	16035	0.998
LRP1B	-4.09	6	-1.48	0.07	1190	0.989	0.93	16034	0.998
TECR	-4.09	6	-1.48	0.07	1191	0.989	0.93	16033	0.998
UBXN4	-4.09	6	-1.47	0.0702	1192	0.989	0.93	16032	0.998
APLP1	-4.09	6	-1.47	0.0702	1193	0.989	0.93	16031	0.998
CPB2	-4.08	6	-1.47	0.0703	1194	0.989	0.93	16030	0.998
SLC46A3	-2.89	3	-1.47	0.0704	1195	0.989	0.93	16029	0.998
OLFM2	-4.08	6	-1.47	0.0705	1196	0.989	0.93	16028	0.998
FAM171A2	-4.08	6	-1.47	0.0705	1197	0.989	0.93	16027	0.998
MPZL1	-2.36	2	-1.47	0.0705	1198	0.989	0.93	16026	0.998
CSTF2	-4.08	6	-1.47	0.0706	1199	0.989	0.929	16025	0.998
STAM	-4.08	6	-1.47	0.0706	1200	0.989	0.929	16024	0.998
GNA13	-4.08	6	-1.47	0.0708	1201	0.989	0.929	16023	0.998
ZFP28	-4.08	6	-1.47	0.0708	1202	0.989	0.929	16022	0.998
UBE2O	-4.08	6	-1.47	0.0708	1203	0.989	0.929	16021	0.998
SEC14L2	-4.07	6	-1.47	0.0708	1204	0.989	0.929	16020	0.998
ZBTB17	-4.07	6	-1.47	0.0708	1205	0.989	0.929	16019	0.998
ALX1	-4.07	6	-1.47	0.0709	1206	0.989	0.929	16018	0.998
EXT1	-4.07	6	-1.47	0.0709	1207	0.989	0.929	16017	0.998
CLEC3B	-3.72	5	-1.47	0.0709	1208	0.989	0.929	16016	0.998
ERGIC1	-4.07	6	-1.47	0.0711	1209	0.989	0.929	16015	0.998
HPS3	-4.07	6	-1.47	0.0711	1210	0.989	0.929	16014	0.998
CTSL2	-3.71	5	-1.47	0.0712	1211	0.989	0.929	16013	0.998
C6orf100	-2.88	3	-1.47	0.0713	1212	0.989	0.929	16012	0.998
GALNT12	-4.07	6	-1.47	0.0713	1213	0.989	0.929	16011	0.998
PDE2A	-4.07	6	-1.47	0.0713	1214	0.989	0.929	16010	0.998
PPP1R14C	-3.32	4	-1.47	0.0714	1215	0.989	0.929	16009	0.998
RGS7	-4.06	6	-1.47	0.0714	1216	0.989	0.929	16008	0.998
TFF1	-4.06	6	-1.46	0.0716	1217	0.989	0.928	16007	0.998
OR11A1	-2.34	2	-1.46	0.0716	1218	0.989	0.928	16006	0.998
PHLPP2	-4.05	6	-1.46	0.0719	1219	0.989	0.928	16005	0.998
DNAJB13	-4.05	6	-1.46	0.0719	1220	0.989	0.928	16004	0.998
MVB12B	-4.05	6	-1.46	0.0721	1221	0.989	0.928	16003	0.998
C1orf174	-3.7	5	-1.46	0.0721	1222	0.989	0.928	16002	0.998
SLC16A6	-2.86	3	-1.46	0.0722	1223	0.989	0.928	16001	0.998
PAMR1	-4.05	6	-1.46	0.0722	1224	0.989	0.928	16000	0.998
NPHS2	-4.05	6	-1.46	0.0722	1225	0.989	0.928	15999	0.998
LILRA5	-2.34	2	-1.46	0.0723	1226	0.989	0.928	15998	0.998
TRMT12	-4.05	6	-1.46	0.0723	1227	0.989	0.928	15997	0.998
RARRES3	-4.05	6	-1.46	0.0724	1228	0.989	0.928	15996	0.998
RNASEH2C	-3.69	5	-1.46	0.0725	1229	0.989	0.928	15995	0.998
EBLN2	-2.33	2	-1.46	0.0726	1230	0.989	0.927	15994	0.998
SH3GL3	-4.04	6	-1.46	0.0727	1231	0.989	0.927	15993	0.998
C15orf52	-4.04	6	-1.46	0.0727	1232	0.989	0.927	15992	0.998
NOXO1	-4.04	6	-1.46	0.0727	1233	0.989	0.927	15991	0.998
IMPA2	-4.04	6	-1.46	0.0728	1234	0.989	0.927	15990	0.998
GSG2	-4.03	6	-1.45	0.073	1235	0.989	0.927	15989	0.998
CCDC12	-4.03	6	-1.45	0.0731	1236	0.989	0.927	15988	0.998
NOTCH3	-4.03	6	-1.45	0.0731	1237	0.989	0.927	15987	0.998
PLP1	-4.03	6	-1.45	0.0732	1238	0.989	0.927	15986	0.998
ENKD1	-4.03	6	-1.45	0.0734	1239	0.989	0.927	15985	0.998
CCDC142	-4.03	6	-1.45	0.0734	1240	0.989	0.927	15984	0.998
HBQ1	-4.03	6	-1.45	0.0735	1241	0.989	0.927	15983	0.998
SOX15	-4.03	6	-1.45	0.0735	1242	0.989	0.927	15982	0.998
NSUN6	-3.67	5	-1.45	0.0735	1243	0.989	0.927	15981	0.998
TP53I11	-4.03	6	-1.45	0.0735	1244	0.989	0.927	15980	0.998
SZRD1	-3.67	5	-1.45	0.0735	1245	0.989	0.926	15979	0.998
AREL1	-4.02	6	-1.45	0.0736	1246	0.989	0.926	15978	0.998
IQSEC2	-4.02	6	-1.45	0.0736	1247	0.989	0.926	15977	0.998
PLEKHO2	-4.02	6	-1.45	0.0736	1248	0.989	0.926	15976	0.998
CDH16	-4.02	6	-1.45	0.0737	1249	0.989	0.926	15975	0.998
ZNF606	-3.67	5	-1.45	0.0738	1250	0.989	0.926	15974	0.998
KIAA1598	-4.02	6	-1.45	0.0738	1251	0.989	0.926	15973	0.998
PAQR4	-4.02	6	-1.45	0.0738	1252	0.989	0.926	15972	0.998
BMP6	-4.02	6	-1.45	0.0738	1253	0.989	0.926	15971	0.998
NR4A2	-4.02	6	-1.45	0.0739	1254	0.989	0.926	15970	0.998
SMURF1	-4.01	6	-1.45	0.0741	1255	0.989	0.926	15969	0.998
TMEM79	-4.01	6	-1.45	0.0741	1256	0.989	0.926	15968	0.998
REPS1	-4.01	6	-1.45	0.0741	1257	0.989	0.926	15967	0.998
C1orf198	-4.01	6	-1.45	0.0742	1258	0.989	0.926	15966	0.998
IARS2	-3.66	5	-1.44	0.0743	1259	0.989	0.926	15965	0.998
EIF4E3	-3.66	5	-1.44	0.0744	1260	0.989	0.926	15964	0.998
NAA11	-2.83	3	-1.44	0.0744	1261	0.989	0.926	15963	0.998
ARID4A	-3.27	4	-1.44	0.0745	1262	0.989	0.926	15962	0.998
ADRBK2	-4.01	6	-1.44	0.0745	1263	0.989	0.926	15961	0.998
GJC3	-3.66	5	-1.44	0.0746	1264	0.989	0.925	15960	0.998
ALPI	-4	6	-1.44	0.0746	1265	0.989	0.925	15959	0.998
C9orf37	-3.66	5	-1.44	0.0747	1266	0.989	0.925	15958	0.998
IFT172	-4	6	-1.44	0.0747	1267	0.989	0.925	15957	0.998
INO80	-4	6	-1.44	0.0749	1268	0.989	0.925	15956	0.998
HSPB2	-4	6	-1.44	0.0749	1269	0.989	0.925	15955	0.998
ARPC1B	-4	6	-1.44	0.075	1270	0.989	0.925	15954	0.998
C5orf52	-4	6	-1.44	0.0751	1271	0.989	0.925	15953	0.998
BMP2K	-4	6	-1.44	0.0751	1272	0.989	0.925	15952	0.998
MMP19	-4	6	-1.44	0.0751	1273	0.989	0.925	15951	0.998
ZNF281	-4	6	-1.44	0.0752	1274	0.989	0.925	15950	0.998
OTUD5	-3.99	6	-1.44	0.0752	1275	0.989	0.925	15949	0.998
KIAA0754	-3.65	5	-1.44	0.0752	1276	0.989	0.925	15948	0.998
IGSF8	-3.99	6	-1.44	0.0753	1277	0.989	0.925	15947	0.998
ZADH2	-3.99	6	-1.44	0.0753	1278	0.989	0.925	15946	0.998
DESI1	-3.99	6	-1.44	0.0754	1279	0.989	0.925	15945	0.998
IL36B	-3.26	4	-1.44	0.0755	1280	0.989	0.925	15944	0.998
FBXL6	-3.99	6	-1.44	0.0755	1281	0.989	0.925	15943	0.998
CYP27B1	-3.99	6	-1.43	0.0756	1282	0.989	0.924	15942	0.998
GOLGA5	-2.82	3	-1.43	0.0757	1283	0.989	0.924	15941	0.998
PPP3CC	-3.98	6	-1.43	0.0758	1284	0.989	0.924	15940	0.998
PALM2	-3.98	6	-1.43	0.0758	1285	0.989	0.924	15939	0.998
RCC2	-2.3	2	-1.43	0.0761	1286	0.989	0.924	15938	0.998
LCP1	-3.98	6	-1.43	0.0762	1287	0.989	0.924	15937	0.998
RHOU	-2.81	3	-1.43	0.0763	1288	0.989	0.924	15936	0.998
CCDC47	-3.97	6	-1.43	0.0763	1289	0.989	0.924	15935	0.998
GAST	-2.81	3	-1.43	0.0764	1290	0.989	0.924	15934	0.998
NMBR	-3.97	6	-1.43	0.0764	1291	0.989	0.924	15933	0.998
TPH2	-3.97	6	-1.43	0.0765	1292	0.989	0.924	15932	0.998
ZNF160	-3.24	4	-1.43	0.0767	1293	0.989	0.923	15931	0.998
[truncated: 15,930 more rows]

## Sheet: DrugZ T15 R2
GENE	sumZ	numObs	normZ	pval_synth	rank_synth	fdr_synth	pval_supp	rank_supp	fdr_supp
[truncated: 17,218 more rows]

[truncated: 1 more sheets: DrugZ T15 R1_R2]
